# Supplementary material for: N-Triflination of pyrazolones: a new method for N–S bond formation
Source: Royal Society of Chemistry journal article supplement (doi:10.1039/d1ob00862e), 2021-01-01

## Electronic Supplementary Information

### ***N*-Triflination of pyrazolones: A new method for N-S bond formation**

Ahwan Panigrahi, Nachimuthu Muniraj, and Kandikere Ramaiah Prabhu\*

Department of Organic Chemistry,

Indian Institute of Science,

Bangalore 560 012,

Karnataka, India

\*[prabhu@iisc.ac.in](mailto:prabhu@iisc.ac.in)

**Table of contents**

| <b>S.No</b> | <b>Title</b>                                                                      | <b>Page No.</b> |
|-------------|-----------------------------------------------------------------------------------|-----------------|
| 1           | General experimental                                                              | ESI-3           |
| 2           | Characterization data for starting material <b>1n-1v</b>                          | ESI-3           |
| 3           | Typical experimental procedure                                                    | ESI-5           |
| 4           | Scale up experimental procedure                                                   | ESI-5           |
| 5           | Characterization data for products                                                | ESI -6          |
| 6           | Crystal data of <b>3ca</b>                                                        | ESI -11         |
| 7           | References                                                                        | ESI -14         |
| 8           | <sup>1</sup> H and <sup>13</sup> C spectra and <sup>19</sup> F spectra of product | ESI-16          |
| 9           | <sup>1</sup> H and <sup>13</sup> C spectra of starting material <b>1n-1v</b>      | ESI-85          |

## General experimental

All reactions were carried out using commercially available solvents. Reactions were monitored by using precoated silica TLC plates. All  $^1\text{H}$  NMR,  $^{13}\text{C}$  NMR, and  $^{19}\text{F}$  NMR spectra were recorded on a BRUKER-AV400 spectrometer in  $\text{CDCl}_3$  (400 MHz for  $^1\text{H}$  NMR and 100 MHz for  $^{13}\text{C}$  NMR and 376 MHz for  $^{19}\text{F}$  NMR), where tetramethylsilane (TMS;  $\delta = 0.00$  ppm) served as an internal standard. The corresponding residual non-deuterated solvent signal ( $\text{CDCl}_3$ ;  $\delta = 77.00$  ppm) was used as an internal standard for  $^{13}\text{C}$  NMR. IR spectra were measured using a Perkin-Elmer FT-IR Spectrometer. Mass spectra were measured with Micromass Q-ToF (ESI-HRMS). Column chromatography was carried out on silica gel 230-400 mesh or 100-200 mesh (Merck), and thin-layer chromatography was carried out using SILICA GEL GF-254. Chemicals obtained from commercial suppliers were used without further purification.

Starting material 3-Methyl-1-phenyl-2-pyrazolin-5-one was purchased from Alfa Aesar, and 1-(4-chlorophenyl)-3-methyl-5-pyrazolone was purchased from TCI, whereas the rest of the pyrazolone derivatives were prepared according to the reported literature procedure.<sup>1-6</sup> Substrate **1n-1v** were isolated in quantitative yield following the literature report.<sup>1</sup> Sodium triflate was purchased from TCI. PIFA was purchased from a local supplier.

### Characterization data for the starting materials:

- 2-(4-Bromophenyl)-5-propyl-2,4-dihydro-3H-pyrazol-3-one (1n).** Light brown solid; *mp*: 116-120 °C;  $R_f$  (20% EtOAc/petroleum ether) 0.5; **IR** (neat,  $\text{cm}^{-1}$ ): 2963, 1717, 1488, 1325;  **$^1\text{H}$  NMR** (400 MHz,  $\text{CDCl}_3$ )  $\delta$  7.80 (d,  $J = 8.8$  Hz, 2H), 7.48 (d,  $J = 8.8$  Hz, 2H), 3.40 (s, 2H), 2.46 (t,  $J = 7.6$  Hz, 2H), 1.72 – 1.63 (m, 2H), 1.02 (t,  $J = 7.6$  Hz, 3H);  **$^{13}\text{C}$  NMR** (100 MHz,  $\text{CDCl}_3$ )  $\delta$  170.5, 160.3, 137.3, 131.8, 120.2, 117.8, 41.8, 33.2, 20.0, 13.8; **HRESI-MS** ( $m/z$ ): Calculated for  $\text{C}_{12}\text{H}_{14}\text{BrN}_2\text{O}$  ( $M + \text{H}^+$ ): 281.0290, found ( $M + \text{H}^+$ ): 281.0293.

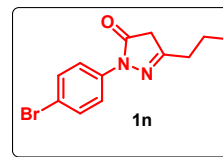

- 4-(5-Oxo-3-propyl-4,5-dihydro-1H-pyrazol-1-yl)benzotrile (1o).** Pale yellow solid; *mp*: 130-134 °C;  $R_f$  (20% EtOAc/petroleum ether) 0.4; **IR** (neat,  $\text{cm}^{-1}$ ): 2963, 2226, 1724, 1600, 1508, 1312;  **$^1\text{H}$  NMR** (400 MHz,  $\text{CDCl}_3$ )  $\delta$  8.05 (d,  $J = 9.2$  Hz, 2H), 7.64 (d,  $J = 8.8$  Hz, 2H), 3.47 (s, 2H), 2.49 (t,  $J = 7.6$  Hz, 2H), 1.75 – 1.65 (m, 2H), 1.03 (t,  $J = 7.2$  Hz, 3H);  **$^{13}\text{C}$  NMR** (100 MHz,  $\text{CDCl}_3$ )  $\delta$  170.9, 161.1, 141.6, 133.0, 118.9, 118.1, 107.4, 41.8, 33.1, 19.7, 13.7; **HRESI-MS** ( $m/z$ ): Calculated for  $\text{C}_{13}\text{H}_{14}\text{N}_3\text{O}$  ( $M + \text{H}^+$ ): 228.1137, found ( $M + \text{H}^+$ ): 228.1139.

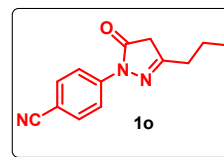

- 2-(3-Nitrophenyl)-5-propyl-2,4-dihydro-3H-pyrazol-3-one (1p).** yellow semi solid,  $R_f$  (20% EtOAc/ petroleum ether) 0.4; **IR** (neat,  $\text{cm}^{-1}$ ): 2965, 1723, 1530, 1483, 1350;  **$^1\text{H}$  NMR** (400 MHz,  $\text{CDCl}_3$ )  $\delta$  8.75 (s, 1H), 8.33 (d,  $J = 8.4$  Hz, 1H) 8.00 ( dd,  $J = 8, 1.2$  Hz, 1H), 7.54 (t,  $J = 8$  Hz, 1H), 3.48 (s, 2H), 2.51 (t,  $J = 7.6$  Hz, 2H), 1.76 – 1.67 (m, 2H), 1.04 (t,  $J = 7.2$  Hz, 3H);  **$^{13}\text{C}$  NMR** (100 MHz,  $\text{CDCl}_3$ )  $\delta$  170.8, 161.0, 148.6, 139.1, 129.7, 123.8, 119.2, 113.3,

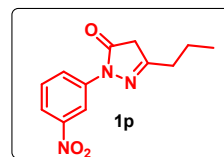

41.9, 33.2, 20.0, 13.8; **HRESI-MS** ( $m/z$ ): Calculated for  $C_{12}H_{14}N_3O_3$  ( $M + H$ )<sup>+</sup>: 248.1035, found ( $M + H$ )<sup>+</sup>: 248.1037.

4. **5-Propyl-2-(m-tolyl)-2,4-dihydro-3H-pyrazol-3-one (1q)**. Colourless oily;  $R_f$  (20% EtOAc/petroleum ether) 0.4; **IR** (neat,  $cm^{-1}$ ): 2967, 1715, 1633, 1491, 1336; **<sup>1</sup>H NMR** (400 MHz,  $CDCl_3$ )  $\delta$  7.67 – 7.65 (m, 2H), 7.26 (td,  $J = 8, 1.2$  Hz, 1H); 6.99 (d,  $J = 7.2$  Hz, 1H), 3.39 (s, 2H), 2.46 (t,  $J = 7.6$  Hz, 2H), 2.37 (s, 3H), 1.72 – 1.63 (m, 2H), 1.01 (t,  $J = 7.2$  Hz, 3H); **<sup>13</sup>C NMR** (100 MHz,  $CDCl_3$ )  $\delta$  170.6, 159.9, 138.8, 138.1, 128.7, 125.9, 119.6, 116.2, 41.8, 33.2, 21.6, 20.1, 13.8; **HRESI-MS** ( $m/z$ ): Calculated for  $C_{13}H_{17}N_2O$  ( $M + H$ )<sup>+</sup>: 217.1341, found ( $M + H$ )<sup>+</sup>: 217.1344.

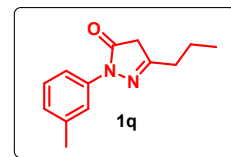

5. **2-Benzyl-5-propyl-2,4-dihydro-3H-pyrazol-3-one (1r)** Colourless solid; **mp**: 116-118 °C;  $R_f$  (20% EtOAc/petroleum ether) 0.1; **IR** (neat,  $cm^{-1}$ ): 2962, 1707, 1599, 1555, 1296; **<sup>1</sup>H NMR** (400 MHz,  $CDCl_3$ )  $\delta$  7.33 – 7.24 (m, 5H), 4.80 (s, 2H), 3.19 (s, 2H), 2.34 (t,  $J = 7.6$  Hz, 2H), 1.62 – 1.53 (m, 2H), 0.94 (t,  $J = 7.2$  Hz, 3H); **<sup>13</sup>C NMR** (100 MHz,  $CDCl_3$ )  $\delta$  172.1, 159.5, 136.7, 128.6, 128.2, 127.7, 47.8, 40.1, 33.1, 20.2, 13.7; **HRESI-MS** ( $m/z$ ): Calculated for  $C_{13}H_{17}N_2O$  ( $M + H$ )<sup>+</sup>: 217.1341, found ( $M + H$ )<sup>+</sup>: 217.1340.

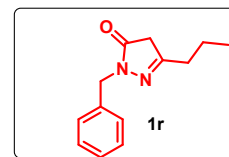

6. **2-(4-Bromophenyl)-5-isopropyl-2,4-dihydro-3H-pyrazol-3-one (1s)**. Brown solid; **mp**: 135-138 °C;  $R_f$  (20% EtOAc/petroleum ether) 0.4; **IR** (neat,  $cm^{-1}$ ): 2968, 1715, 1488, 1333; **<sup>1</sup>H NMR** (400 MHz,  $CDCl_3$ )  $\delta$  7.80 (d,  $J = 8.8$  Hz, 2H), 7.47 (d,  $J = 8.8$  Hz, 2H), 3.41 (s, 2H), 2.82 – 2.72 (m, 1H), 1.24 (d,  $J = 7.2$  Hz, 6H); **<sup>13</sup>C NMR** (100 MHz,  $CDCl_3$ )  $\delta$  170.5, 164.7, 137.3, 131.8, 120.1, 117.6, 39.9, 30.8, 20.1; **HRESI-MS** ( $m/z$ ): Calculated for  $C_{12}H_{14}BrN_2O$  ( $M + H$ )<sup>+</sup>: 281.0290, found ( $M + H$ )<sup>+</sup>: 281.0290.

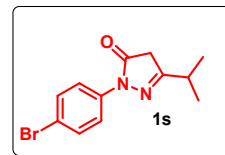

7. **4-(3-Isopropyl-5-oxo-4,5-dihydro-1H-pyrazol-1-yl)benzonitrile (1t)**. Brown solid; **mp**: 124-128 °C;  $R_f$  (20% EtOAc/petroleum ether) 0.3; **IR** (neat,  $cm^{-1}$ ): 2967, 2224, 1718, 1603, 1508, 1337; **<sup>1</sup>H NMR** (400 MHz,  $CDCl_3$ )  $\delta$  8.08 (d,  $J = 8.8$  Hz, 2H); 7.66 (d,  $J = 8.8$  Hz, 2H), 3.47 (s, 2H), 2.86 – 2.75 (m, 1H), 1.27 (d,  $J = 7.2$  Hz, 6H); **<sup>13</sup>C NMR** (100 MHz,  $CDCl_3$ )  $\delta$  171.0, 165.4, 141.7, 133.1, 119.0, 118.3, 107.6, 40.1, 30.9, 20.0; **HRESI-MS** ( $m/z$ ): Calculated for  $C_{13}H_{14}N_3O$  ( $M + H$ )<sup>+</sup>: 228.1137, found ( $M + H$ )<sup>+</sup>: 228.1139.

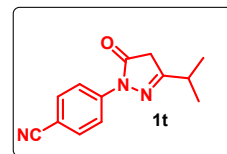

8. **5-Isopropyl-2-(3-nitrophenyl)-2,4-dihydro-3H-pyrazol-3-one (1u)**. yellow oily;  $R_f$  (20% EtOAc/petroleum ether) 0.3; **IR** (neat,  $cm^{-1}$ ): 2971, 1725, 1531, 1483, 1358; **<sup>1</sup>H NMR** (400 MHz,  $CDCl_3$ )  $\delta$  8.74 (s, 1H), 8.32 (dd,  $J = 8, 0.8$  Hz, 1H); 8.00 – 7.97 (m, 1H), 7.53 (t,  $J = 8.4$  Hz, 1H), 3.50 (s, 2H), 2.88 – 2.78 (m, 1H), 1.28 (d,  $J = 6.8$  Hz, 6H); **<sup>13</sup>C NMR** (100 MHz,  $CDCl_3$ )  $\delta$  170.8, 165.4, 148.5, 139.1, 129.7, 123.7, 119.1, 113.2, 40.0, 30.8, 20.0; **HRESI-MS** ( $m/z$ ): Calculated for  $C_{12}H_{14}N_3O_3$  ( $M + H$ )<sup>+</sup>: 248.1035, found ( $M + H$ )<sup>+</sup>: 248.1037.

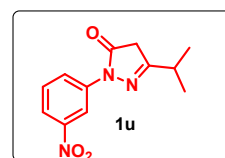

9. **5-Isopropyl-2-(m-tolyl)-2,4-dihydro-3H-pyrazol-3-one (1v)**. Brown oily;  $R_f$  (20% EtOAc/petroleum ether) 0.4; **IR** (neat,  $cm^{-1}$ ): 2962, 1715, 1613, 1490, 1328; **<sup>1</sup>H NMR** (400 MHz,  $CDCl_3$ )  $\delta$  7.68 – 7.66 (m, 2H), 7.25 (t,  $J = 7.6$  Hz, 1H), 6.98 (d,  $J =$

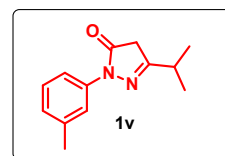

7.2 Hz, 1H), 3.38 (s, 2H), 2.82 – 2.71 (m, 1H), 2.37 (s, 3H), 1.23 (d,  $J = 7.2$  Hz, 6H);  $^{13}\text{C}$  NMR (100 MHz,  $\text{CDCl}_3$ )  $\delta$  170.6, 164.2, 138.7, 138.1, 128.6, 125.8, 119.5, 116.2, 39.8, 30.7, 21.6, 20.1; **HRESI-MS** ( $m/z$ ): Calculated for  $\text{C}_{13}\text{H}_{17}\text{N}_2\text{O}$  ( $\text{M} + \text{H}$ ) $^+$ : 217.1341, found ( $\text{M} + \text{H}$ ) $^+$ : 217.1344.

### Typical experimental procedure for trifluoromethyl sulfonylation of pyrazolones

Pyrazolone derivative (0.30 mmol, 1 equiv), Langlois reagent (0.45 mmol, 1.5 equiv), PIFA (0.60 mmol, 2 equiv) were dissolved in 1 mL of TFE/ $\text{H}_2\text{O}$  mixture (3:1) in a 8-mL screw-cap reaction vial and the reaction mixture was stirred at rt for 5 minutes. After the completion of the reaction (monitored by TLC), the reaction mixture was transferred to a 10mL RB and subjected to a rotary evaporator to remove TFE, followed by extraction of the organic component using DCM water workup. The organic layer was dried over anhydrous  $\text{Na}_2\text{SO}_4$  and concentrated under reduced pressure. The crude product was purified on a silica gel column using EtOAc/petroleum ether to get the pure products.

### Scale-up experimental procedure

Pyrazolone 1a (500mg, 2.87 mmol, 1 equiv), Langlois reagent 2 (672mg, 4.31 mmol, 1.5equiv), PIFA (2.471gm, 5.74 mmol, 2equiv) were dissolved in 10 mL of TFE/ $\text{H}_2\text{O}$  mixture (3:1) in a 24-neck 50ml RB, and the reaction mixture was stirred at the room temperature for 40 minutes. After completing the reaction (monitored by TLC), the TFE was removed under vacuum, followed by extraction of the organic layer using  $\text{CH}_2\text{Cl}_2$  (3  $\times$  20 mL). The organic layer was dried over anhydrous  $\text{Na}_2\text{SO}_4$  and concentrated under reduced pressure. The crude product was purified on a silica gel column using EtOAc/petroleum ether to get pure product **3aa** in 72% (636mg).

## Characterization data for the products:

1. **5-Methyl-2-phenyl-1-((trifluoromethyl)sulfonyl)-1,2-dihydro-3H-pyrazol-3-one (3aa).**

Colourless solid; Yield– (77mg, 83%); *mp*: 130-134 °C; *R<sub>f</sub>* (30% EtOAc/petroleum ether) 0.5; Prepared as shown in general experimental procedure. **IR** (neat, cm<sup>-1</sup>): 1709, 1624, 1419, 1215, 1129; **<sup>1</sup>H NMR** (400 MHz, CDCl<sub>3</sub>) δ 7.48 – 7.41 (m, 2H), 7.39 – 7.30 (m, 3H), 5.91 (s, 1H), 2.55 (d, *J* = 1.1 Hz, 3H); **<sup>13</sup>C NMR** (100 MHz, CDCl<sub>3</sub>) δ 167.5, 157.2, 137.9, 129.1, 128.2, 124.7, 120.0 (q, *J*<sub>C-F</sub> = 329 Hz), 110.1, 15.7; **<sup>19</sup>F NMR** (376 MHz, CDCl<sub>3</sub>) δ -68.8; **HRESI-MS** (*m/z*): Calculated for C<sub>11</sub>H<sub>10</sub>F<sub>3</sub>N<sub>2</sub>O<sub>3</sub>S (M + H)<sup>+</sup>: 307.0364, found (M + H)<sup>+</sup>: 307.0363.

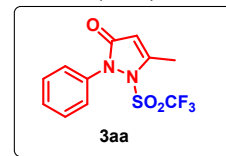2. **2-Phenyl-5-propyl-1-((trifluoromethyl)sulfonyl)-1,2-dihydro-3H-pyrazol-3-one (3ba).**

Yellow solid; Yield– (55mg, 55%); *mp*: 90-94 °C; *R<sub>f</sub>* (20% EtOAc/petroleum ether) 0.7; Prepared as shown in general experimental procedure. **IR** (neat, cm<sup>-1</sup>): 1723, 1623, 1423, 1226, 1130; **<sup>1</sup>H NMR** (400 MHz, CDCl<sub>3</sub>) δ 7.47 – 7.43 (m, 2H), 7.37 – 7.31 (m, 3H), 5.92 (s, 1H), 2.85 (t, *J* = 7.2 Hz, 2H), 1.77-1.86 (m, 2H), 1.08 (t, *J* = 7.3 Hz, 3H); **<sup>13</sup>C NMR** (100 MHz, CDCl<sub>3</sub>) δ 167.7, 161.9, 138.0, 129.1, 128.1, 124.5, 120.0 (q, *J*<sub>C-F</sub> = 329 Hz), 109.3, 31.1, 21.3, 13.6; **<sup>19</sup>F NMR** (376 MHz, CDCl<sub>3</sub>) δ -67.8; **HRESI-MS** (*m/z*): Calculated for C<sub>13</sub>H<sub>14</sub>F<sub>3</sub>N<sub>2</sub>O<sub>3</sub>S (M + H)<sup>+</sup>: 335.0677, found (M + H)<sup>+</sup>: 335.0678.

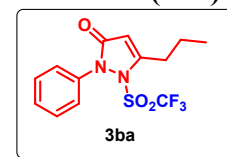3. **5-Isopropyl-2-phenyl-1-((trifluoromethyl)sulfonyl)-1,2-dihydro-3H-pyrazol-3-one (3ca).**

Yellow solid; Yield– (66mg, 66%); *mp*: 127-130 °C; *R<sub>f</sub>* (20% EtOAc/petroleum ether) 0.7; Prepared as shown in general experimental procedure. **IR** (neat, cm<sup>-1</sup>): 1733, 1617, 1420, 1220, 1128; **<sup>1</sup>H NMR** (400 MHz, CDCl<sub>3</sub>) δ 7.47 – 7.43 (m, 2H), 7.36 – 7.31 (m, 3H), 5.92 (s, 1H), 3.40 – 3.30 (m, 1H), 1.39 (d, *J* = 6.8 Hz, 6H); **<sup>13</sup>C NMR** (100 MHz, CDCl<sub>3</sub>) δ 168.4, 167.7, 138.2, 129.1, 128.0, 124.2, 120.0 (q, *J*<sub>C-F</sub> = 329 Hz), 107.7, 28.7, 21.9; **<sup>19</sup>F NMR** (376 MHz, CDCl<sub>3</sub>) δ -67.8; **HRESI-MS** (*m/z*): Calculated for C<sub>13</sub>H<sub>14</sub>F<sub>3</sub>N<sub>2</sub>O<sub>3</sub>S (M + H)<sup>+</sup>: 335.0677, found (M + H)<sup>+</sup>: 335.0674.

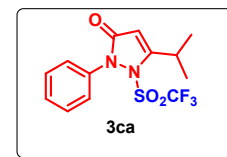4. **2,5-Diphenyl-1-((trifluoromethyl)sulfonyl)-1,2-dihydro-3H-pyrazol-3-one (3da).**

Colourless solid; Yield– (18mg, 16%); *mp*: 113-118 °C; *R<sub>f</sub>* (20% EtOAc/petroleum ether) 0.6; Prepared as shown in general experimental procedure. **IR** (neat, cm<sup>-1</sup>): 1740, 1622, 1424, 1238, 1128; **<sup>1</sup>H NMR** (400 MHz, CDCl<sub>3</sub>) δ 7.64 (d, *J* = 7.2 Hz, 2H), 7.57 – 7.53 (m, 1H), 7.49 – 7.44 (m, 6H), 7.36 – 7.32 (m, 1H), 6.16 (s, 1H); **<sup>13</sup>C NMR** (100 MHz, CDCl<sub>3</sub>) δ 166.7, 159.6, 137.9, 132.3, 129.2, 129.1, 128.7, 127.9, 127.7, 124.1, 120.0 (q, *J*<sub>C-F</sub> = 330 Hz), 110.2; **<sup>19</sup>F NMR** (376 MHz, CDCl<sub>3</sub>) δ -66.3; **HRESI-MS** (*m/z*): Calculated for C<sub>16</sub>H<sub>11</sub>F<sub>3</sub>N<sub>2</sub>O<sub>3</sub>SNa (M + Na)<sup>+</sup>: 391.0340, found (M + Na)<sup>+</sup>: 391.0339.

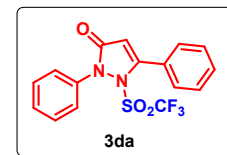5. **2,5-Dimethyl-1-((trifluoromethyl)sulfonyl)-1,2-dihydro-3H-pyrazol-3-one (3ea).**

yellow oily; Yield– (37.5mg, 51%); *R<sub>f</sub>* (30% EtOAc/ petroleum ether) 0.5; Prepared as shown in general experimental procedure. **IR** (neat, cm<sup>-1</sup>): 1726, 1629, 1416, 1230, 1131; **<sup>1</sup>H NMR** (400 MHz, CDCl<sub>3</sub>) δ 5.85 (s, 1H), 3.42 (s, 3H), 2.44 (d, *J*

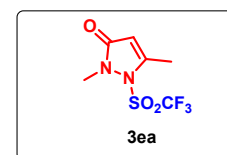

= 1.2 Hz, 3H);  $^{13}\text{C}$  NMR (100 MHz,  $\text{CDCl}_3$ )  $\delta$  169.0, 156.1, 120.0(q,  $J_{\text{C-F}} = 328$  Hz), 110.4, 35.9, 15.4;  $^{19}\text{F}$  NMR (376 MHz,  $\text{CDCl}_3$ )  $\delta$  -63.1; **HRESI-MS** ( $m/z$ ): Calculated for  $\text{C}_6\text{H}_8\text{F}_3\text{N}_2\text{O}_3\text{S}$  ( $\text{M} + \text{H}$ ) $^+$ : 245.0208, found ( $\text{M} + \text{H}$ ) $^+$ : 245.0207.

**6. 2-(4-Bromophenyl)-5-methyl-1-((trifluoromethyl)sulfonyl)-1,2-dihydro-3H-pyrazol-3-one**

**(3fa)**. yellow solid; Yield– (67mg, 58%); *mp*: 125-129 °C;  $R_f$  (30% EtOAc/petroleum ether) 0.7; Prepared as shown in general experimental procedure. **IR** (neat,  $\text{cm}^{-1}$ ): 1729, 1630, 1486, 1422, 1226, 1128;  $^1\text{H}$  NMR (400 MHz,  $\text{CDCl}_3$ )  $\delta$  7.57 (d,  $J = 8.4$  Hz, 2H), 7.21 (d,  $J = 8.8$  Hz, 2H), 5.91 (s, 1H), 2.55 (d,  $J = 1.2$  Hz, 3H);  $^{13}\text{C}$  NMR (100 MHz,  $\text{CDCl}_3$ )  $\delta$  167.1, 157.6, 136.9, 132.3, 126.1, 121.9, 120.0 (q,  $J_{\text{C-F}} = 329$  Hz), 110.1, 15.8;  $^{19}\text{F}$  NMR (376 MHz,  $\text{CDCl}_3$ )  $\delta$  -68.0; **HRESI-MS** ( $m/z$ ): Calculated for  $\text{C}_{12}\text{H}_{12}\text{F}_3\text{N}_2\text{O}_3\text{S}$  ( $\text{M} + \text{H}$ ) $^+$ : 384.9469, found ( $\text{M} + \text{H}$ ) $^+$ : 384.9465.

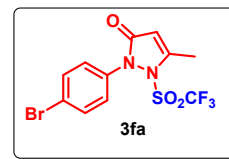

**7. 2-(4-Chlorophenyl)-5-methyl-1-((trifluoromethyl)sulfonyl)-1,2-dihydro-3H-pyrazol-3-one**

**(3ga)**. Pale yellow solid; Yield– (72mg, 71%); *mp*: 130-134 °C;  $R_f$  (30% EtOAc/petroleum ether) 0.6; Prepared as shown in general experimental procedure. **IR** (neat,  $\text{cm}^{-1}$ ): 1725, 1628, 1490, 1418, 1315, 1228, 1131;  $^1\text{H}$  NMR (400 MHz,  $\text{CDCl}_3$ )  $\delta$  7.41 (d,  $J = 8.7$  Hz, 2H), 7.27 (d,  $J = 8.7$  Hz, 2H), 5.91 (s, 1H), 2.56 (d,  $J = 0.8$  Hz, 3H);  $^{13}\text{C}$  NMR (100 MHz,  $\text{CDCl}_3$ )  $\delta$  167.2, 157.6, 136.4, 134.0, 129.4, 125.9, 120.0 (q,  $J_{\text{C-F}} = 329$  Hz), 110.1, 15.8;  $^{19}\text{F}$  NMR (376 MHz,  $\text{CDCl}_3$ )  $\delta$  -68.0; **HRESI-MS** ( $m/z$ ): Calculated for  $\text{C}_{11}\text{H}_8\text{ClF}_3\text{N}_2\text{O}_3\text{SNa}$  ( $\text{M} + \text{Na}$ ) $^+$ : 362.9794, found ( $\text{M} + \text{Na}$ ) $^+$ : 362.9791.

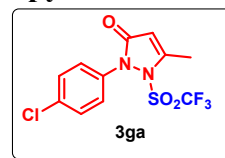

**8. 4-(3-Methyl-5-oxo-2-((trifluoromethyl)sulfonyl)-2,5-dihydro-1H-pyrazol-1-yl)benzonitrile**

**(3ha)**. Pale yellow solid; Yield – (52mg, 52%); *mp*: 146-149 °C;  $R_f$  (30% EtOAc/petroleum ether) 0.4; Prepared as shown in general experimental procedure. **IR** (neat,  $\text{cm}^{-1}$ ): 2230, 1735, 1631, 1419, 1226, 1126;  $^1\text{H}$  NMR (400 MHz,  $\text{CDCl}_3$ )  $\delta$  7.74 (d,  $J = 8.8$  Hz, 2H), 7.51 (d,  $J = 8.8$  Hz, 2H), 5.95 (s, 1H), 2.59 (d,  $J = 1.0$  Hz, 3H);  $^{13}\text{C}$  NMR (100 MHz,  $\text{CDCl}_3$ )  $\delta$  166.4, 158.3, 141.5, 133.0, 124.1, 120.0 (q,  $J_{\text{C-F}} = 329$  Hz), 118.1, 111.3, 110.1, 15.8;  $^{19}\text{F}$  NMR (376 MHz,  $\text{CDCl}_3$ )  $\delta$  -67.6; **HRESI-MS** ( $m/z$ ): Calculated for  $\text{C}_{12}\text{H}_9\text{F}_3\text{N}_3\text{O}_3\text{S}$  ( $\text{M} + \text{H}$ ) $^+$ : 332.0317, found ( $\text{M} + \text{H}$ ) $^+$ : 332.0319.

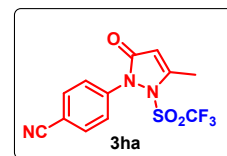

**9. 5-Methyl-2-(3-nitrophenyl)-1-((trifluoromethyl)sulfonyl)-1,2-dihydro-3H-pyrazol-3-one**

**(3ia)**. Yellow solid; Yield– (46mg, 44%); *mp*: 149-154 °C;  $R_f$  (30% EtOAc/petroleum ether) 0.5; Prepared as shown in general experimental procedure. **IR** (neat,  $\text{cm}^{-1}$ ): 1730, 1631, 1533, 1421, 1352, 1226, 1129;  $^1\text{H}$  NMR (400 MHz,  $\text{CDCl}_3$ )  $\delta$  8.23 – 8.21 (m, 2H), 7.74 – 7.71 (m, 1H), 7.67 – 7.62 (m, 1H), 5.96 (s, 1H), 2.61 (d,  $J = 0.8$  Hz, 3H);  $^{13}\text{C}$  NMR (100 MHz,  $\text{CDCl}_3$ )  $\delta$  166.8, 158.5, 148.6, 138.9, 130.1, 130.0, 122.6, 120.0 (q,  $J_{\text{C-F}} = 329$  Hz), 119.0, 109.9, 15.8;  $^{19}\text{F}$  NMR (376 MHz,  $\text{CDCl}_3$ )  $\delta$  -67.7; **HRESI-MS** ( $m/z$ ): Calculated for  $\text{C}_{11}\text{H}_9\text{F}_3\text{N}_3\text{O}_5\text{S}$  ( $\text{M} + \text{H}$ ) $^+$ : 352.0215, found ( $\text{M} + \text{H}$ ) $^+$ : 352.0211.

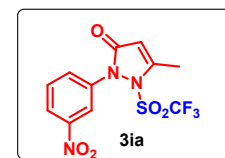

**10. 2-(4-Methoxyphenyl)-5-methyl-1-((trifluoromethyl)sulfonyl)-1,2-dihydro-3H-pyrazol-3-one (3ja).** Pale yellow solid; Yield– (51mg, 51%); *mp*: 105-109 °C;  $R_f$  (30% EtOAc/petroleum ether) 0.4; Prepared as shown in general experimental procedure. **IR** (neat,  $\text{cm}^{-1}$ ): 1730, 1620, 1509, 1421, 1225, 1129;  **$^1\text{H NMR}$**  (400 MHz,  $\text{CDCl}_3$ )  $\delta$  7.22 (d,  $J = 8.8$  Hz, 2H), 6.95 (d,  $J = 8.8$  Hz, 2H), 5.91 (s, 1H), 3.82 (s, 3H), 2.54 (d,  $J = 0.8$  Hz, 3H);  **$^{13}\text{C NMR}$**  (100 MHz,  $\text{CDCl}_3$ )  $\delta$  167.9, 159.6, 156.9, 130.4, 126.9, 120.0(q,  $J_{\text{C-F}} = 329$  Hz), 114.4, 110.0, 55.5, 15.8;  **$^{19}\text{F NMR}$**  (376 MHz,  $\text{CDCl}_3$ )  $\delta$  -68.3; **HRESI-MS** ( $m/z$ ): Calculated for  $\text{C}_{12}\text{H}_{11}\text{F}_3\text{N}_2\text{O}_4\text{SNa}$  ( $\text{M} + \text{Na}$ ) $^+$ : 359.0289, found ( $\text{M} + \text{Na}$ ) $^+$ : 359.0285.

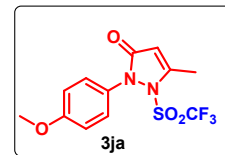

**11. 5-Methyl-2-(o-tolyl)-1-((trifluoromethyl)sulfonyl)-1,2-dihydro-3H-pyrazol-3-one (3ka).** Pale yellow solid; Yield– (70mg, 73%); *mp*: 86-90 °C;  $R_f$  (30% EtOAc/petroleum ether) 0.6; Prepared as shown in general experimental procedure. **IR** (neat,  $\text{cm}^{-1}$ ): 1734, 1631, 1421, 1230, 1130;  **$^1\text{H NMR}$**  (400 MHz,  $\text{CDCl}_3$ )  $\delta$  7.30 (d,  $J = 4.0$  Hz, 2H), 7.27 – 7.22 (m, 1H), 7.13 (d,  $J = 7.6$  Hz, 1H), 5.92 (s, 1H), 2.54 (d,  $J = 1.1$  Hz, 3H), 2.29 (s, 3H);  **$^{13}\text{C NMR}$**  (100 MHz,  $\text{CDCl}_3$ )  $\delta$  167.7, 156.8, 137.3, 136.2, 131.5, 129.3, 126.7, 126.5, 120.1 (q,  $J_{\text{C-F}} = 328$  Hz), 110.1, 17.7, 15.7;  **$^{19}\text{F NMR}$**  (376 MHz,  $\text{CDCl}_3$ )  $\delta$  -68.2; **HRESI-MS** ( $m/z$ ): Calculated for  $\text{C}_{12}\text{H}_{12}\text{F}_3\text{N}_2\text{O}_3\text{S}$  ( $\text{M} + \text{H}$ ) $^+$ : 321.0521, found ( $\text{M} + \text{H}$ ) $^+$ : 321.0517.

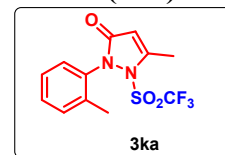

**12. 5-Methyl-2-(m-tolyl)-1-((trifluoromethyl)sulfonyl)-1,2-dihydro-3H-pyrazol-3-one (3la).** Pale yellow solid; Yield– (49mg, 51%); *mp*: 108-113 °C;  $R_f$  (30% EtOAc/petroleum ether) 0.6; Prepared as shown in general experimental procedure. **IR** (neat,  $\text{cm}^{-1}$ ): 1724, 1633, 1421, 1229, 1128;  **$^1\text{H NMR}$**  (400 MHz,  $\text{CDCl}_3$ )  $\delta$  7.32 (t,  $J = 7.7$  Hz, 1H), 7.17- 7.10 (m, 3H), 5.90 (s, 1H), 2.54 (d,  $J = 0.8$  Hz, 3H), 2.39 (s, 3H);  **$^{13}\text{C NMR}$**  (100 MHz,  $\text{CDCl}_3$ )  $\delta$  167.7, 157.1, 139.2, 137.8, 129.2, 128.9, 125.5, 121.9, 120.1(q,  $J_{\text{C-F}} = 329$  Hz), 110.2, 21.5, 15.7;  **$^{19}\text{F NMR}$**  (376 MHz,  $\text{CDCl}_3$ )  $\delta$  -68.162; **HRESI-MS** ( $m/z$ ): Calculated for  $\text{C}_{12}\text{H}_{11}\text{F}_3\text{N}_2\text{O}_3\text{SNa}$  ( $\text{M} + \text{Na}$ ) $^+$ : 343.0340, found ( $\text{M} + \text{Na}$ ) $^+$ : 343.0337.

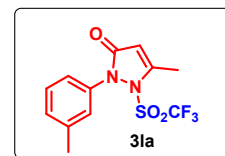

**13. 2-Benzyl-5-methyl-1-((trifluoromethyl)sulfonyl)-1,2-dihydro-3H-pyrazol-3-one (3ma).** Yellow oily; Yield– (61mg, 63%);  $R_f$  (20% EtOAc/petroleum ether) 0.6; Prepared as shown in general experimental procedure. **IR** (neat,  $\text{cm}^{-1}$ ): 1735, 1629, 1416, 1236, 1134;  **$^1\text{H NMR}$**  (400 MHz,  $\text{CDCl}_3$ )  $\delta$  7.30 – 7.27 (m, 3H), 7.25 – 7.22 (m, 2H), 5.84 (s, 1H), 5.12 (s, 2H), 3.31 (d,  $J = 0.8$  Hz, 3H);  **$^{13}\text{C NMR}$**  (100 MHz,  $\text{CDCl}_3$ )  $\delta$  169.8, 157.5, 134.3, 128.9, 128.7, 128.5, 120.0 (q,  $J_{\text{C-F}} = 328$  Hz), 111.1, 51.9, 15.6;  **$^{19}\text{F NMR}$**  (376 MHz,  $\text{CDCl}_3$ )  $\delta$  -68.4; **HRESI-MS** ( $m/z$ ): Calculated for  $\text{C}_{12}\text{H}_{11}\text{F}_3\text{N}_2\text{O}_3\text{SNa}$  ( $\text{M} + \text{Na}$ ) $^+$ : 343.0340, found ( $\text{M} + \text{Na}$ ) $^+$ : 343.0341.

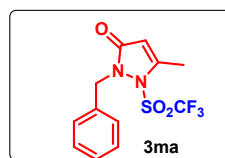

**14. 2-(4-Bromophenyl)-5-propyl-1-((trifluoromethyl)sulfonyl)-1,2-dihydro-3H-pyrazol-3-one (3na).** Yellow oily; Yield– (87mg, 70%);  $R_f$  (20% EtOAc/petroleum ether) 0.8; Prepared as shown in general experimental procedure. **IR** (neat,  $\text{cm}^{-1}$ ): 1731, 1623, 1424, 1225, 1129;  **$^1\text{H NMR}$**  (400 MHz,  $\text{CDCl}_3$ )  $\delta$  7.56 (d,  $J = 8.8$  Hz, 2H), 7.20 (d,  $J = 8.8$  Hz, 2H), 5.91 (s, 1H), 2.84 (td,  $J = 7.7, 0.8$  Hz, 2H), 1.85 – 1.75 (m, 2H), 1.07 (t,  $J = 7.3$  Hz, 3H);  **$^{13}\text{C NMR}$**  (100 MHz,

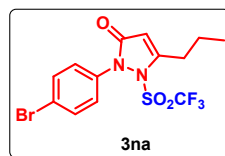



$\text{CDCl}_3$ )  $\delta$  167.3, 162.3, 137.0, 132.3, 125.9, 121.8, 120.0 (q,  $J_{\text{C-F}} = 263$  Hz), 109.2, 31.1, 21.3, 13.6;  $^{19}\text{F}$  NMR (376 MHz,  $\text{CDCl}_3$ )  $\delta$  -67.7; **HRESI-MS** ( $m/z$ ): Calculated for  $\text{C}_{13}\text{H}_{13}\text{BrF}_3\text{N}_2\text{O}_3\text{S}$  ( $\text{M} + \text{H}$ ) $^+$ : 412.9782, found ( $\text{M} + \text{H}$ ) $^+$ : 412.9779.

**15. 4-(5-Oxo-3-propyl-2-((trifluoromethyl)sulfonyl)-2,5-dihydro-1H-pyrazol-1-yl)benzonitrile**

**(3oa)**. Yellow solid; Yield– (56mg, 52%); *mp*: 97-101 °C;  $R_f$  (20% EtOAc/petroleum ether) 0.5; Prepared as shown in general experimental procedure. **IR** (neat,  $\text{cm}^{-1}$ ): 1734, 1627, 1422, 1224, 1127;  $^1\text{H}$  NMR (400 MHz,  $\text{CDCl}_3$ )  $\delta$  7.74 (d,  $J = 8.8$  Hz, 2H), 7.49 (d,  $J = 8.8$  Hz, 2H), 5.94 (s, 1H), 2.87 (t,  $J = 7.6$  Hz, 2H), 1.87 – 1.78 (m, 2H), 1.09 (t,  $J = 7.6$  Hz, 3H);  $^{13}\text{C}$  NMR (100 MHz,  $\text{CDCl}_3$ )  $\delta$  166.6, 163.0, 141.6, 133.0, 123.9, 120.0(q,  $J_{\text{C-F}} = 329$  Hz), 118.2, 111.2, 109.2, 31.1, 21.3, 13.6;  $^{19}\text{F}$  NMR (376 MHz,  $\text{CDCl}_3$ )  $\delta$  -67.4; **HRESI-MS** ( $m/z$ ): Calculated for  $\text{C}_{14}\text{H}_{13}\text{F}_3\text{N}_3\text{O}_3\text{S}$  ( $\text{M} + \text{H}$ ) $^+$ : 360.0630, found ( $\text{M} + \text{H}$ ) $^+$ : 360.0627.

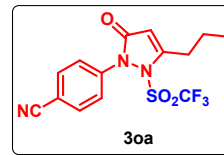

**16. 2-(3-Nitrophenyl)-5-propyl-1-((trifluoromethyl)sulfonyl)-1,2-dihydro-3H-pyrazol-3-one**

**(3pa)**. Yellow oily; Yield– (48mg, 42%);  $R_f$  (20% EtOAc/ petroleum ether) 0.4; Prepared as shown in general experimental procedure. **IR** (neat,  $\text{cm}^{-1}$ ): 1711, 1622, 1529, 1435, 1352, 1232, 1133;  $^1\text{H}$  NMR (400 MHz,  $\text{CDCl}_3$ )  $\delta$  8.25 – 8.22 (m, 2H), 7.75 – 7.73 (m, 1H), 7.69 – 7.65 (m, 1H), 5.98 (s, 1H), 2.91 (td,  $J = 7.3, 0.7$  Hz, 2H), 1.92 – 1.82 (m, 2H), 1.14 (t,  $J = 7.6$  Hz, 3H);  $^{13}\text{C}$  NMR (100 MHz,  $\text{CDCl}_3$ )  $\delta$  167.0, 163.1, 148.5, 138.9, 129.9, 129.8, 122.5, 120.0 (q,  $J_{\text{C-F}} = 329$  Hz), 118.8, 108.9, 31.1, 21.2, 13.6;  $^{19}\text{F}$  NMR (376 MHz,  $\text{CDCl}_3$ )  $\delta$  -67.4; **HRESI-MS** ( $m/z$ ): Calculated for  $\text{C}_{13}\text{H}_{13}\text{F}_3\text{N}_3\text{O}_5\text{S}$  ( $\text{M} + \text{H}$ ) $^+$ : 380.0528, found ( $\text{M} + \text{H}$ ) $^+$ : 380.0530.

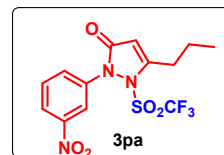

**17. 5-Propyl-2-(m-tolyl)-1-((trifluoromethyl)sulfonyl)-1,2-dihydro-3H-pyrazol-3-one**

**(3qa)**. Colourless solid; Yield– (67mg, 64%); *mp*: 80-85°C;  $R_f$  (20% EtOAc/petroleum ether) 0.6; Prepared as shown in general experimental procedure. **IR** (neat,  $\text{cm}^{-1}$ ): 1732, 1619, 1422, 1225, 1130;  $^1\text{H}$  NMR (400 MHz,  $\text{CDCl}_3$ )  $\delta$  7.32 (t,  $J = 7.7$  Hz, 1H), 7.16 – 7.09 (m, 3H), 5.91 (s, 1H), 2.84 (t,  $J = 7.2$  Hz, 2H), 2.39 (s, 3H), 1.86 – 1.77 (m, 2H), 1.08 (t,  $J = 7.3$  Hz, 3H);  $^{13}\text{C}$  NMR (100 MHz,  $\text{CDCl}_3$ )  $\delta$  167.8, 161.8, 139.2, 137.9, 129.1, 128.9, 125.3, 121.7, 120.0(q,  $J_{\text{C-F}} = 330$  Hz), 109.3, 31.1, 21.5, 21.3, 13.6;  $^{19}\text{F}$  NMR (376 MHz,  $\text{CDCl}_3$ )  $\delta$  -67.8; **HRESI-MS** ( $m/z$ ): Calculated for  $\text{C}_{14}\text{H}_{15}\text{F}_3\text{N}_2\text{O}_3\text{SNa}$  ( $\text{M} + \text{Na}$ ) $^+$ : 371.0653, found ( $\text{M} + \text{Na}$ ) $^+$ : 371.0648.

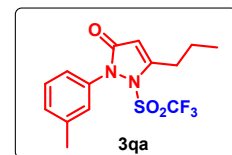

**18. 2-Benzyl-5-propyl-1-((trifluoromethyl)sulfonyl)-1,2-dihydro-3H-pyrazol-3-one**

**(3ra)** Yellow oily; Yield– (72mg, 69%);  $R_f$ (20% EtOAc/petroleum ether) 0.8; Prepared as shown in general experimental procedure. **IR** (neat,  $\text{cm}^{-1}$ ): 1727, 1622, 1427, 1230, 1132;  $^1\text{H}$  NMR (400 MHz,  $\text{CDCl}_3$ )  $\delta$  7.29 – 7.27 (m, 3H), 7.25 – 7.21 (m, 2H), 5.83 (s, 1H), 5.10 (s, 2H), 2.61 (t,  $J = 7.2$  Hz, 2H), 1.52 – 1.43 (m, 2H), 0.73 (t,  $J = 7.2$  Hz, 3H);  $^{13}\text{C}$  NMR (100 MHz,  $\text{CDCl}_3$ )  $\delta$  170.5, 162.6, 134.1, 128.9, 128.7, 128.5, 120.0 (q,  $J_{\text{C-F}} = 328$  Hz), 110.6, 52.4, 30.8, 21.2, 12.9;  $^{19}\text{F}$  NMR (376 MHz,  $\text{CDCl}_3$ )  $\delta$  -68.2; **HRESI-MS** ( $m/z$ ): Calculated for  $\text{C}_{14}\text{H}_{15}\text{F}_3\text{N}_2\text{O}_3\text{SNa}$  ( $\text{M} + \text{Na}$ ) $^+$ : 371.0653, found ( $\text{M} + \text{Na}$ ) $^+$ : 371.0651.

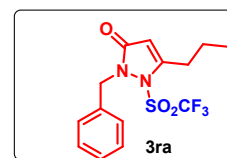

**19. 2-(4-Bromophenyl)-5-isopropyl-1-((trifluoromethyl)sulfonyl)-1,2-dihydro-3H-pyrazol-3-one**

**(3sa)**. Pale yellow solid; Yield– (57.5mg,

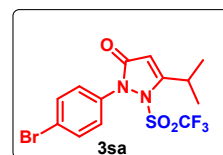

46%); **mp**: 118-122 °C;  $R_f$  (20% EtOAc/petroleum ether) 0.7; Prepared as shown in general experimental procedure. **IR** (neat,  $\text{cm}^{-1}$ ): 1722, 1618, 1429, 1225, 1123;  **$^1\text{H}$  NMR** (400 MHz,  $\text{CDCl}_3$ )  $\delta$  7.56 (d,  $J = 8$  Hz, 2H), 7.20 (d,  $J = 8$  Hz, 2H), 5.91 (s, 1H), 3.36 – 3.33 (m, 1H), 1.39 (d,  $J = 6$  Hz, 6H);  **$^{13}\text{C}$  NMR** (100 MHz,  $\text{CDCl}_3$ )  $\delta$  168.7, 167.3, 137.2, 132.3, 125.6, 121.6, 120.0 (q,  $J_{\text{C-F}} = 330$  Hz), 107.6, 28.7, 21.9;  **$^{19}\text{F}$  NMR** (376 MHz,  $\text{CDCl}_3$ )  $\delta$  -67.6; **HRESI-MS** ( $m/z$ ): Calculated for  $\text{C}_{13}\text{H}_{13}\text{BrF}_3\text{N}_2\text{O}_3\text{S}$  ( $M + \text{H}$ ) $^+$ : 412.9782, found ( $M + \text{H}$ ) $^+$ : 412.9779.

**20. 4-(3-Isopropyl-5-oxo-2-((trifluoromethyl)sulfonyl)-2,5-dihydro-1H-pyrazol-1-yl)benzotrile (3ta).**

Colourless solid; Yield– (55mg, 51%); **mp**: 117-122 °C  $R_f$  (20% EtOAc/petroleum ether) 0.7; Prepared as shown in general experimental procedure. **IR** (neat,  $\text{cm}^{-1}$ ): 1735, 1624, 1424, 1224, 1126;  **$^1\text{H}$  NMR** (400 MHz,  $\text{CDCl}_3$ )  $\delta$  7.74 (d,  $J = 8.4$  Hz, 2H); 7.50 (d,  $J = 8.4$  Hz, 2H), 5.94 (s, 1H), 3.38 – 3.34 (m, 1H), 1.41 (d,  $J = 6.8$  Hz, 6H);  **$^{13}\text{C}$  NMR** (100 MHz,  $\text{CDCl}_3$ )  $\delta$  169.2, 166.5, 141.7, 133.0, 123.6, 120.0 (q,  $J_{\text{C-F}} = 329$  Hz), 118.2, 111.0, 107.6, 28.8, 21.8;  **$^{19}\text{F}$  NMR** (376 MHz,  $\text{CDCl}_3$ )  $\delta$  -67.4; **HRESI-MS** ( $m/z$ ): Calculated for  $\text{C}_{14}\text{H}_{13}\text{F}_3\text{N}_3\text{O}_3\text{S}$  ( $M + \text{H}$ ) $^+$ : 360.0630, found ( $M + \text{H}$ ) $^+$ : 360.0627.

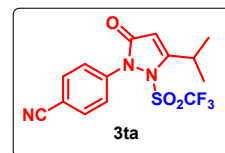

**21. 5-Isopropyl-2-(3-nitrophenyl)-1-((trifluoromethyl)sulfonyl)-1,2-dihydro-3H-pyrazol-3-one (3ua).**

Pale yellow solid; Yield– (53mg, 46%); **mp**: 126-130 °C;  $R_f$  (20% EtOAc/petroleum ether) 0.4; Prepared as shown in general experimental procedure. **IR** (neat,  $\text{cm}^{-1}$ ): 1737, 1618, 1534, 1425, 1351, 1225, 1127;  **$^1\text{H}$  NMR** (400 MHz,  $\text{CDCl}_3$ )  $\delta$  8.21 – 8.19 (m, 2H), 7.72 – 7.70 (m, 1H), 7.66 – 7.62 (m, 1H), 5.95 (s, 1H), 3.43 – 3.33 (m, 1H), 1.43 (d,  $J = 6.8$  Hz, 6H);  **$^{13}\text{C}$  NMR** (100 MHz,  $\text{CDCl}_3$ )  $\delta$  169.4, 166.9, 148.5, 139.1, 130.0, 129.5, 122.4, 120.0 (q,  $J_{\text{C-F}} = 329$  Hz), 118.6, 107.5, 28.8, 21.9;  **$^{19}\text{F}$  NMR** (376 MHz,  $\text{CDCl}_3$ )  $\delta$  -67.4; **HRESI-MS** ( $m/z$ ): Calculated for  $\text{C}_{13}\text{H}_{13}\text{F}_3\text{N}_3\text{O}_5\text{S}$  ( $M + \text{H}$ ) $^+$ : 380.0528, found ( $M + \text{H}$ ) $^+$ : 380.0524.

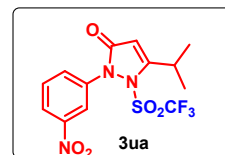

**22. 5-Isopropyl-2-(m-tolyl)-1-((trifluoromethyl)sulfonyl)-1,2-dihydro-3H-pyrazol-3-one (3va).**

Colourless solid; Yield– (38mg, 36%); **mp**: 113-117 °C;  $R_f$  (20% EtOAc/petroleum ether) 0.6; Prepared as shown in general experimental procedure. **IR** (neat,  $\text{cm}^{-1}$ ): 1716, 1613, 1426, 1224, 1126;  **$^1\text{H}$  NMR** (400 MHz,  $\text{CDCl}_3$ )  $\delta$  7.32 (t,  $J = 7.6$  Hz, 1H), 7.16 – 7.08 (m, 3H), 5.91 (s, 1H), 3.38 – 3.32 (m, 1H), 2.40 (s, 3H), 1.39 (d,  $J = 6.8$  Hz, 6H);  **$^{13}\text{C}$  NMR** (100 MHz,  $\text{CDCl}_3$ )  $\delta$  168.3, 167.8, 139.2, 138.1, 129.0, 128.9, 125.0, 121.4, 120.0 (q,  $J_{\text{C-F}} = 329$  Hz), 107.7, 28.7, 21.9, 21.5;  **$^{19}\text{F}$  NMR** (376 MHz,  $\text{CDCl}_3$ )  $\delta$  -67.8; **HRESI-MS** ( $m/z$ ): Calculated for  $\text{C}_{14}\text{H}_{16}\text{F}_3\text{N}_2\text{O}_3\text{S}$  ( $M + \text{H}$ ) $^+$ : 349.0834, found ( $M + \text{H}$ ) $^+$ : 349.0829.

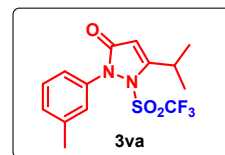

**23. 2-Benzyl-5-isopropyl-1-((trifluoromethyl)sulfonyl)-1,2-dihydro-3H-pyrazol-3-one (3wa).**

Yellow oily; Yield– (64mg, 61%);  $R_f$  (20% EtOAc/petroleum ether) 0.8; Prepared as shown in general experimental procedure. **IR** (neat,  $\text{cm}^{-1}$ ): 1732, 1617, 1419, 1231, 1132;  **$^1\text{H}$  NMR** (400 MHz,  $\text{CDCl}_3$ )  $\delta$  7.28 – 7.27 (m, 3H), 7.21 – 7.19 (m, 2H), 5.82 (s, 1H), 5.09 (s, 2H), 3.17 – 3.06 (m, 1H), 1.05 (d,  $J = 6.8$  Hz, 6H);  **$^{13}\text{C}$  NMR** (100 MHz,  $\text{CDCl}_3$ )  $\delta$  170.9, 169.6, 134.0, 128.8, 128.6, 128.5, 120.0 (q,  $J_{\text{C-F}} = 329$  Hz), 108.6, 53.0, 28.4, 21.5;  **$^{19}\text{F}$  NMR** (376 MHz,  $\text{CDCl}_3$ )  $\delta$  -68.2; **HRESI-MS** ( $m/z$ ): Calculated for  $\text{C}_{14}\text{H}_{15}\text{F}_3\text{N}_2\text{O}_3\text{SNa}$  ( $M + \text{Na}$ ) $^+$ : 371.0653, found ( $M + \text{Na}$ ) $^+$ : 371.0649.

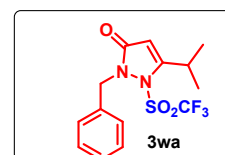

### Crystal data for compound 3ca

Translucent yellow tabular crystals of approximate dimension 0.092 x 0.189 x 0.324mm were selected under a polarizing microscope for single-crystal x-ray diffraction studies. With the help of paratone oil, the sample was taken on a fiber loop and mounted over a diffractometer head. Data collection was done at low temperature (100K or -173.15°C) using the Oxford cryostream device (N<sub>2</sub> flow). The X-ray intensity data were collected using Bruker APEX-II Ultra (3-circle machine) operated at 40KV voltage and 80mA current. Collected raw images were corrected for Lorentz and polarization effects. Multi-scan absorption corrections were applied using the program SADABS<sup>7</sup>. The structure was solved and refined using SHELXT<sup>8</sup> and SHELXL<sup>9</sup> programs, respectively. Spherical atomic-scattering factors were assumed (Independent Atom Model, IAM). All non-hydrogen atoms were modeled anisotropically, and hydrogen atoms were refined as a riding model using HFIX cards. Aromatic phenyl hydrogens and double bond  $\alpha$ -hydrogen-bonded to C4 atom were added to the model through HFIX 43 card and methyl hydrogen atoms (bonded to C32 and C33) were given HFIX 137(X-C torsion refined) and methine hydrogen (bonded to C31) were added through HFIX 13 cards. For all hydrogen atoms, Uiso values are constrained to 1.2 times that of the parent atom's Uiso (1.5 times for methyl hydrogens). Software used for creating molecular graphics is ORTEP3 for windows<sup>10</sup> and packages used for computing publication materials are SHELXLE<sup>11</sup> and WinGX<sup>10</sup>. Crystallographic and refinement data are reported in Table 1, and selected bond lengths and angles are reported in Table 2.

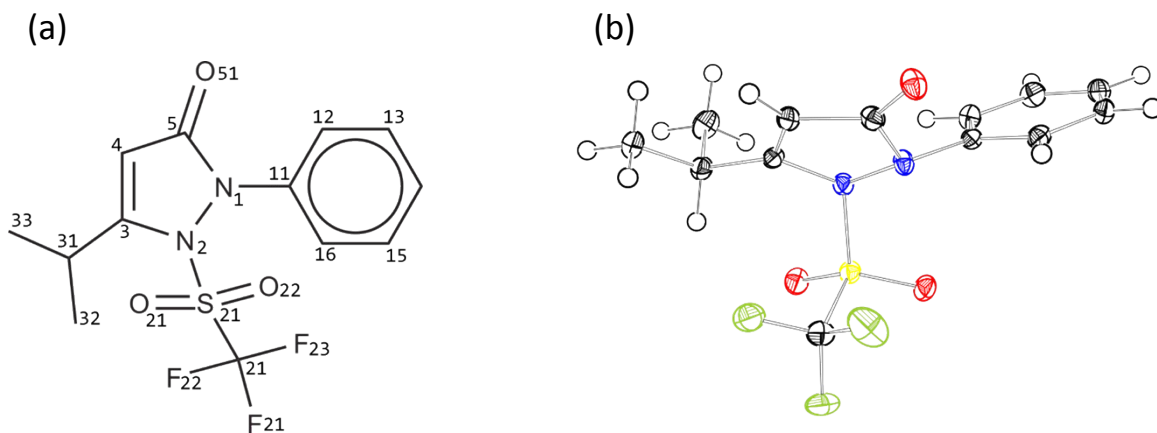

Figure 1:(a) Schematic representation of the compound 3ca with atom numbering scheme; (b) ORTEP plot with 50% probability ellipsoid; Color code:C=Black, H=Hollow Sphere with arbitrary radius, N=Blue, O=Red,F=Green,S=Yellow.

Largest positive difference peak of  $0.524\text{e}\text{\AA}^{-3}$  located at (0.1598, 0.5281, 0.1205) was attributed to the bonding electrons. It is located equidistant between S21 and C21 atoms. Deepest hole of  $-0.357\text{e}\text{\AA}^{-3}$  at (0.2008, 0.5042, 0.1535) was found near S21 (distance of 0.37Å). IAM model was

inadequate to model such features. Electron density synthesis with coefficient  $[F_o-F_c]$  was calculated using the program PLATON<sup>12</sup>.

Table 1: Crystal data and structure refinement for **3ca**

|                                 |                                                                                |                                   |                                             |
|---------------------------------|--------------------------------------------------------------------------------|-----------------------------------|---------------------------------------------|
| Identification code             | 3ca                                                                            |                                   | -30<= <i>l</i> <=30                         |
| Empirical formula               | C <sub>13</sub> H <sub>13</sub> F <sub>3</sub> N <sub>2</sub> O <sub>3</sub> S | Reflections collected             | 60045                                       |
| Formula weight                  | 334.31                                                                         | Independent reflections           | 3541 [R(int) = 0369]                        |
| Temperature                     | 100(2) K                                                                       | Completeness to theta = 25.242°   | 100.00%                                     |
| Wavelength                      | 0.71073 Å                                                                      | Absorption correction             | Semi-empirical from equivalents             |
| Crystal system                  | Orthorhombic                                                                   | Max. and min. transmission        | 0.7457 and 0.5914                           |
| Space group                     | <i>P</i> b c a                                                                 | Refinement method                 | Full-matrix least-squares on F <sup>2</sup> |
| Unit cell dimensions            | a = 8.6070(5) Å<br>b = 14.6316(8) Å<br>c = 22.5134(14) Å                       | Data / restraints / parameters    | 3541 / 0 / 201                              |
| Volume                          | 2835.2(3) Å <sup>3</sup>                                                       | Goodness-of-fit on F <sup>2</sup> | 1.153                                       |
| Z                               | 8                                                                              | Final R indices [I>2σ(I)]         | R1 = 0.0375,<br>wR2 = 0.0923                |
| Density (calculated)            | 1.566 mg/m <sup>3</sup>                                                        | R indices (all data)              | R1 = 0.0401,<br>wR2 = 0.0938                |
| Absorption coefficient          | 0.277 mm <sup>-1</sup>                                                         | Extinction coefficient            | constrained to zero                         |
| F(000)                          | 1376                                                                           | Largest diff. peak and hole       | 0.524 and -0.357 e.Å <sup>-3</sup>          |
| Crystal size(mm)                | 0.324 x 0.189 x 0.092                                                          |                                   |                                             |
| Theta range for data collection | 1.809 to 28.349°                                                               |                                   |                                             |
| Index ranges                    | -11<= <i>h</i> <=11,<br>-19<= <i>k</i> <=19,                                   |                                   |                                             |

Table 2: Selected Bond length and angles of 5-membered pyrazol-3-one ring (Å and °)

|           |          |           |          |
|-----------|----------|-----------|----------|
| N1-C5     | 1.417(2) | N2-N1-C11 | 117.2(1) |
| N1-N2     | 1.422(2) | N1-N2-C3  | 107.1(1) |
| N1-C11    | 1.437(2) | N1-N2-S21 | 112.4(9) |
| N2-C3     | 1.442(2) | C3-N2-S21 | 119.4(1) |
| N2-S21    | 1.678(1) | C4-C3-N2  | 108.7(1) |
| C3-C4     | 1.338(2) | C4-C3-C31 | 129.8(1) |
| C3-C31    | 1.496(2) | N2-C3-C31 | 121.4(1) |
| C4-C5     | 1.455(2) | C3-C4-C5  | 110.1(1) |
| C5-O51    | 1.213(2) | O51-C5-N1 | 123.4(1) |
|           |          | O51-C5-C4 | 130.7(1) |
| C5-N1-N2  | 108.2(1) | N1-C5-C4  | 105.9(1) |
| C5-N1-C11 | 120.0(1) |           |          |

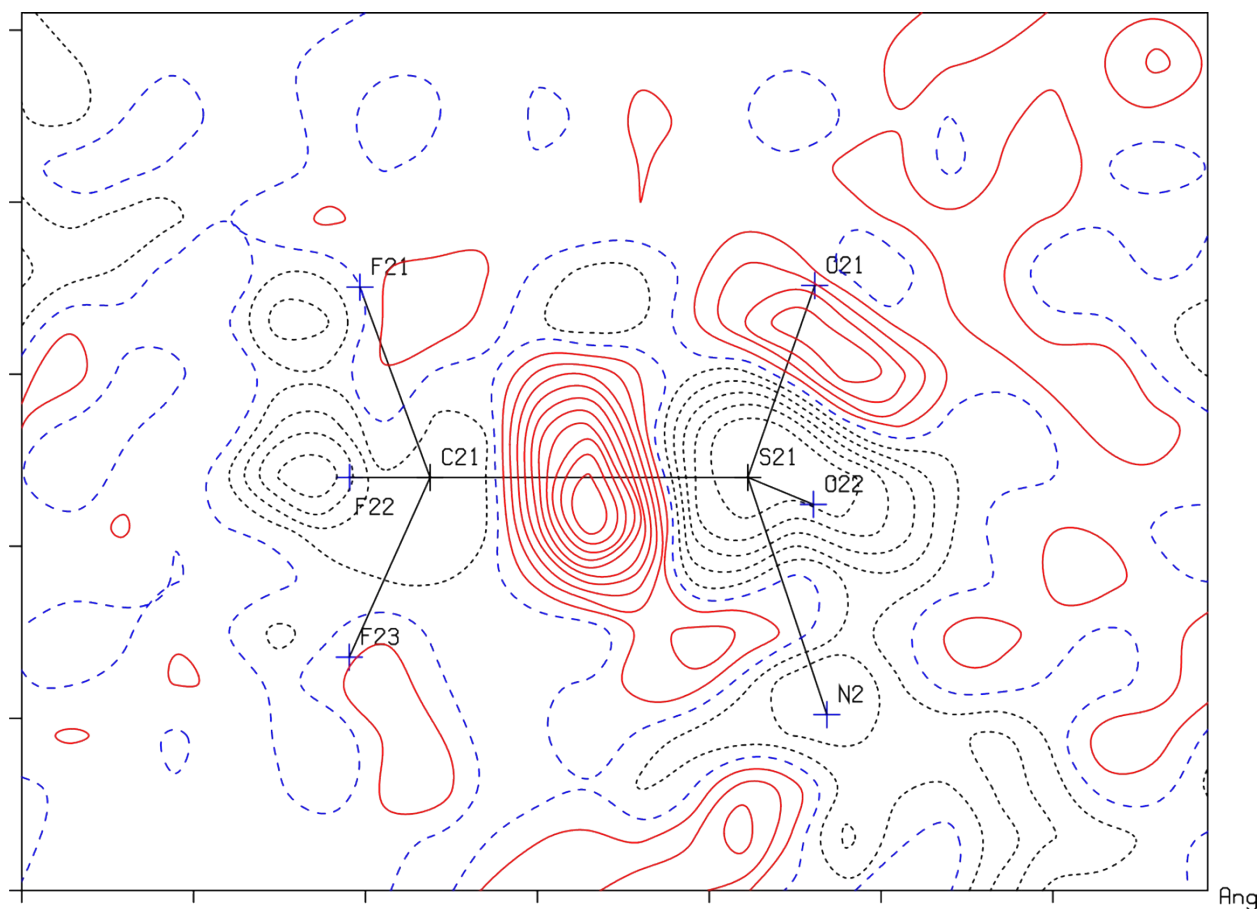

Figure 2: Final difference Fourier synthesis with Coefficients  $[F_o - F_c]$ ; Dashed blue lines represent -ve contours, dotted black represent zero contour, solid red lines represent +ve contours. High +ve contour was found equidistant between S21 and C21.

Plane definition:  $8.5399x - 0.9813y + 2.3649z = 5.9550$ ; Contour level ( $e\text{\AA}^{-3}$ ): -0.30 0.50 0.05

Crystallographic data (including structure factors) for the structures reported in this paper have been deposited with the Cambridge Crystallographic Data Centre. CCDC 2071406 contain the supplementary crystallographic data for this paper. Copies of the data can be obtained free of charge from The Cambridge Crystallographic Data Centre via [www.ccdc.cam.ac.uk/structures](http://www.ccdc.cam.ac.uk/structures).

### References:

1. X. -H. Xu, X. Wang, G. -K. Liu, E. Tokunaga, N. Shibata. *Org. Lett.* **2012**, *14*, 2544.
2. R. Maity, C. Gharui, A. K. Sil, S. C. Pan. *Org. Lett.* **2017**, *19*, 662.
3. A. Thupyai, C. Pimpasri, S. Yotphan. *Org. Biomol. Chem.* **2018**, *16*, 424.
4. T. Kittikool, S. Yotphan. *Eur. J. Org. Chem.* **2020**, 961.
5. M. Sera, H. Mizufune, H. Tawada. *Tetrahedron.* **2015**, *71*, 2833.
6. K. J. Duffy, M. G. Darcy, E. Delorme, S. B. Dillon, D. F. Eppley, C. E. Miller, L. Giampa, C. B. Hopson, Y. Huang, R. M. Keenan, P. Lamb, L. Leong, N. Liu, S. G. Miller, A. T. Price, J. Rosen, R. Shah, T. N.

Shaw, H. Smith, K. C. Stark, S. –S. Tian, C. Tyree, K. J. Wiggall, L. Zhang, J. I. Luengo. *J. Med. Chem.* **2001**, *44*, 22, 3730.

7. L. Krause, R. Herbst-Irmer, G. M. Sheldrick, D. Stalke., *J. Appl. Cryst.* **2015**, *48*, 3.

8. G. Sheldrick, *Acta Crystallogr. Sect. A.* **2015**, *71*, 3.

9. G. Sheldrick, *Acta Crystallogr. Sect. C: Cryst. Struct. Commun.* **2015**, *71*, 3.

10. L. J. Farrugia, *J. Appl. Cryst.* **2012**, *45*, 849.

11. C. B. Hubschle, G. M. Sheldrick, B. Dittrich. *J. Appl. Cryst.* **2011**, *44*, 1281.

12. A. L. Spek, *J. Appl. Cryst.* **2003**, *36*, 7.

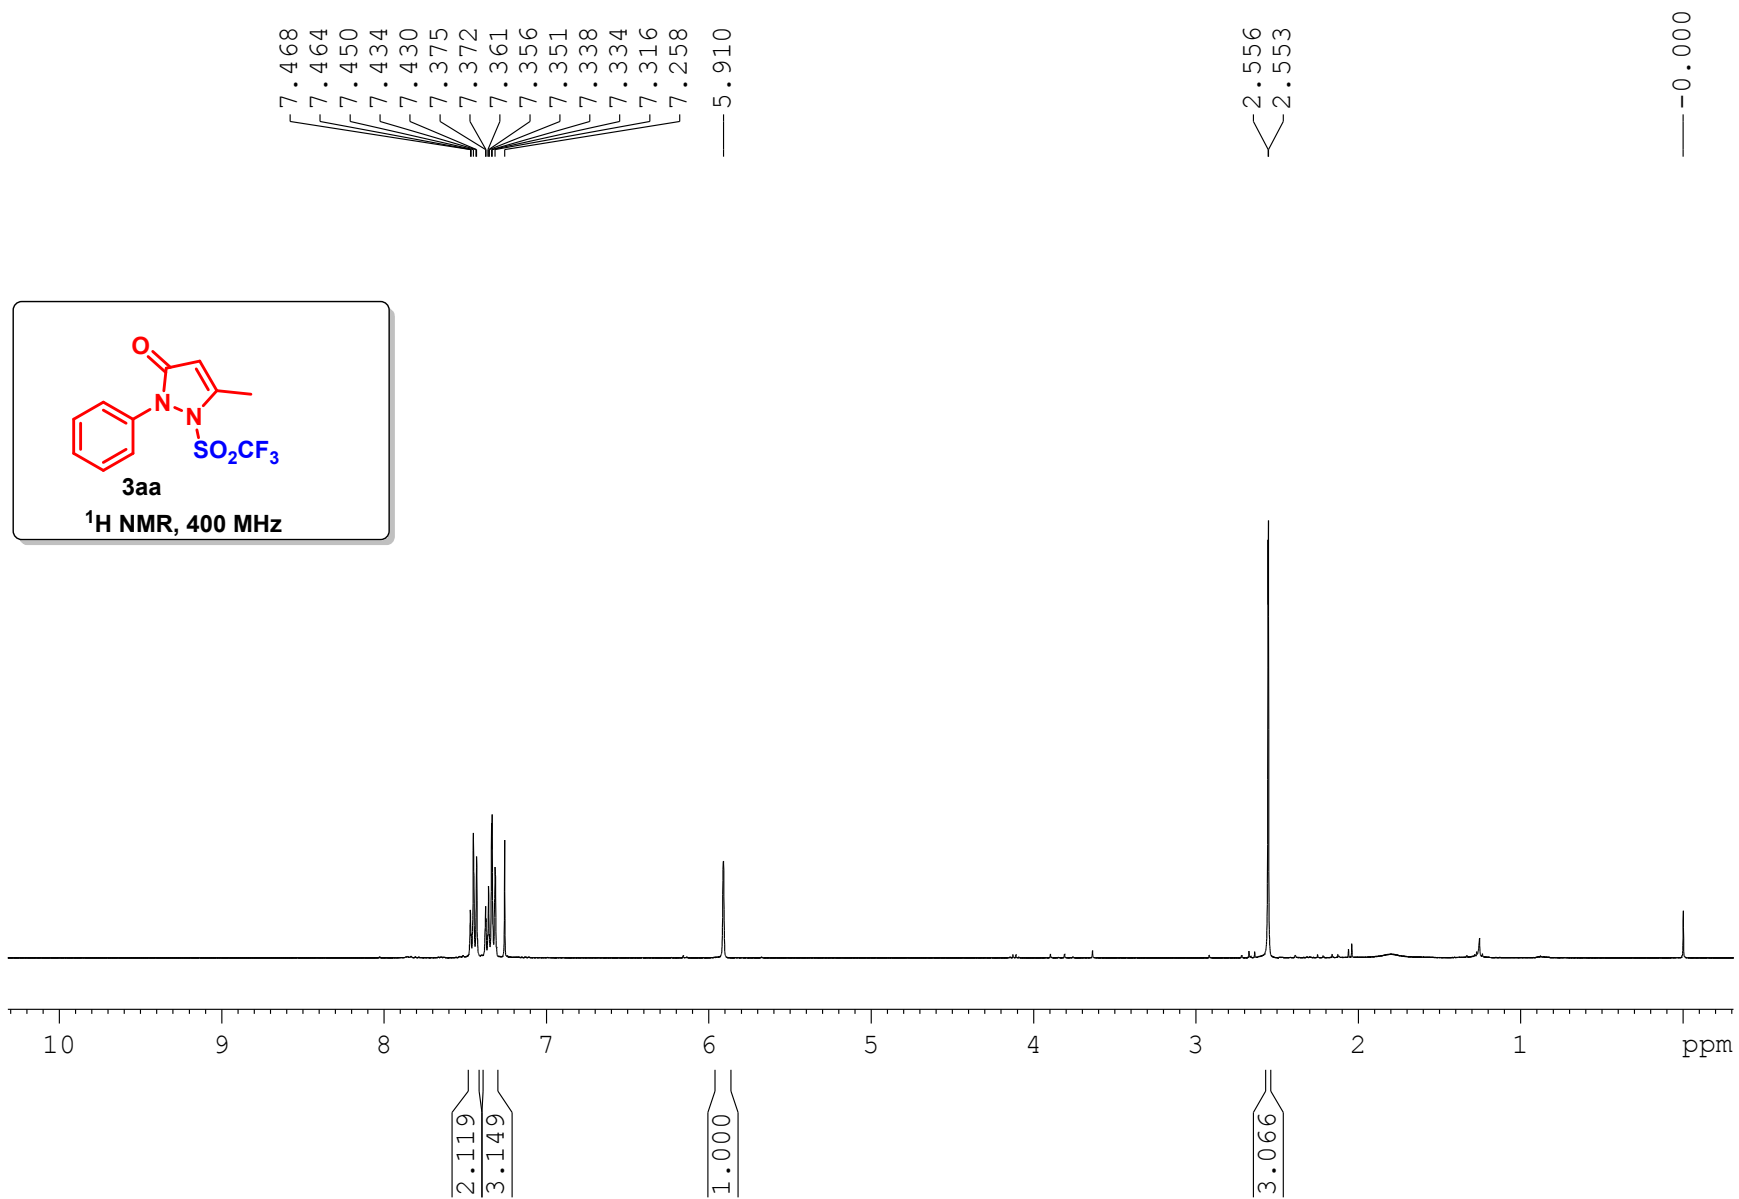



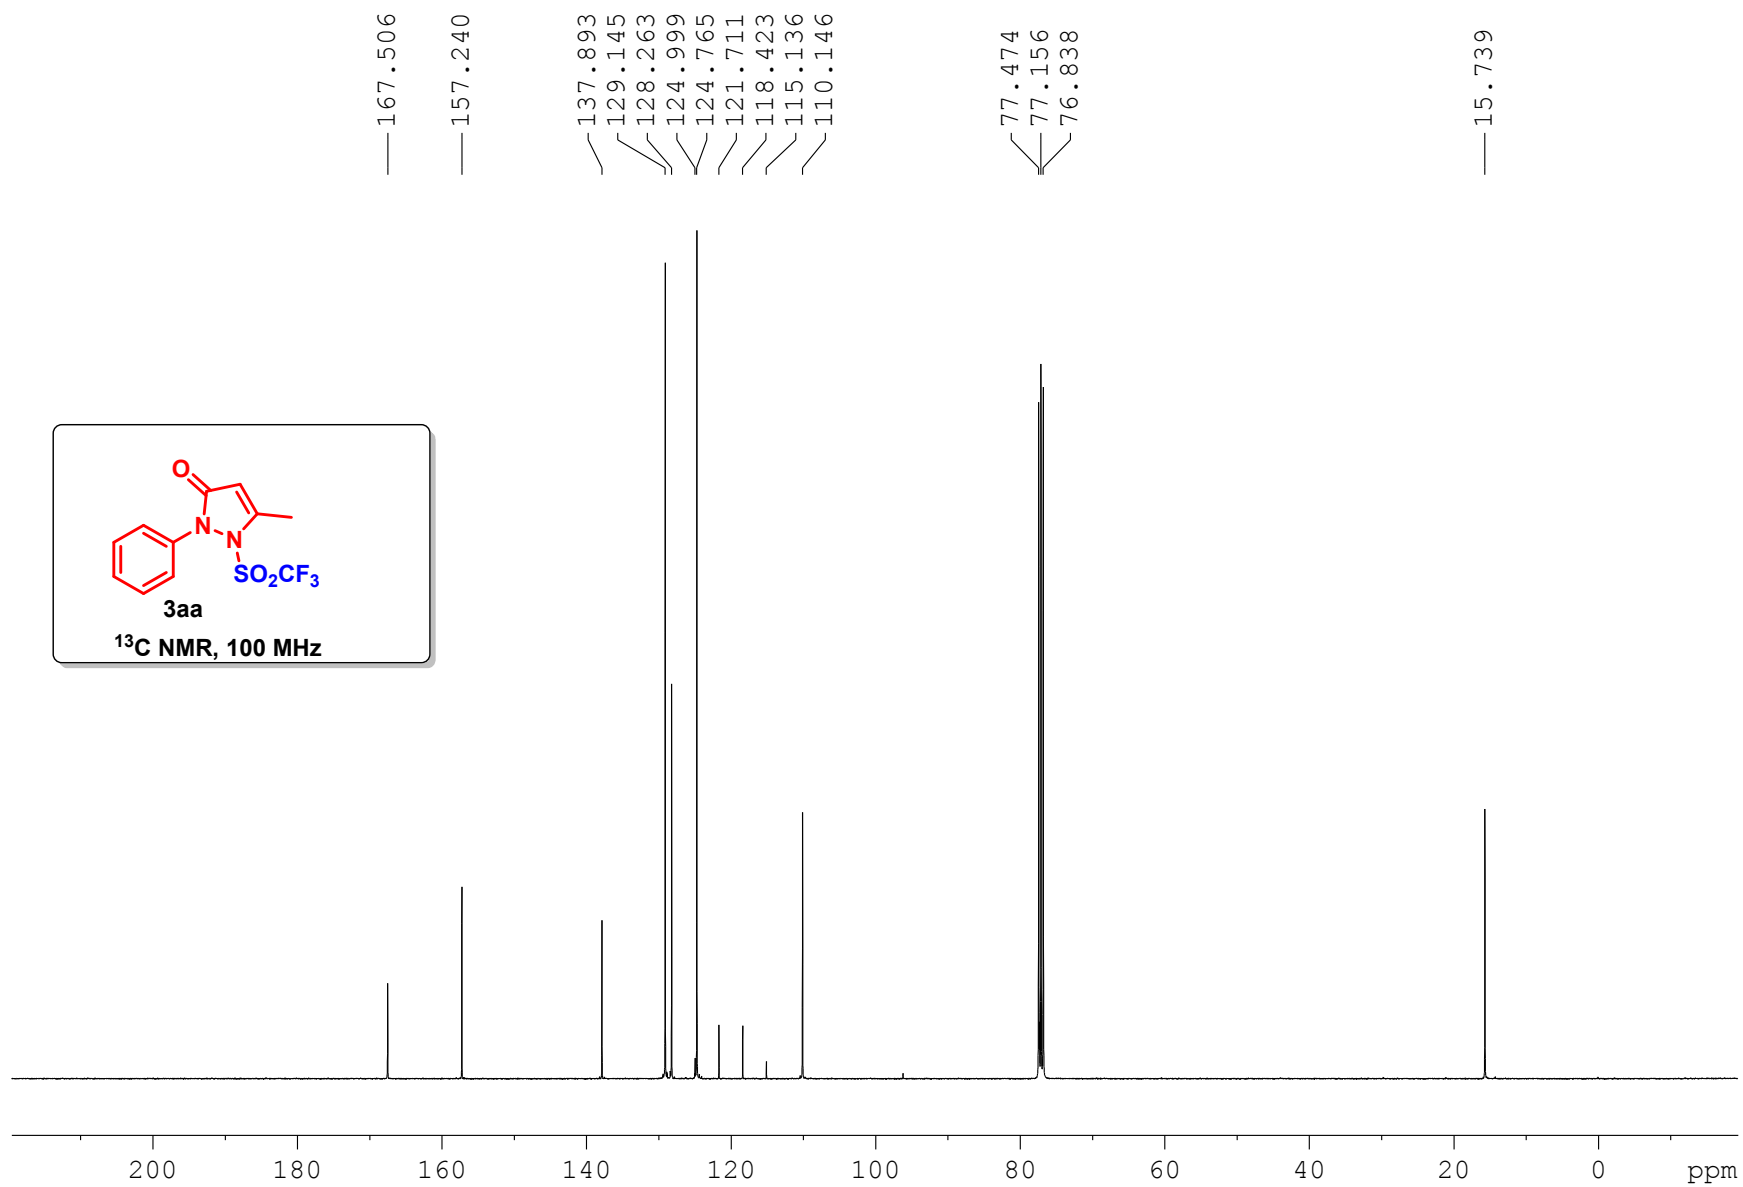

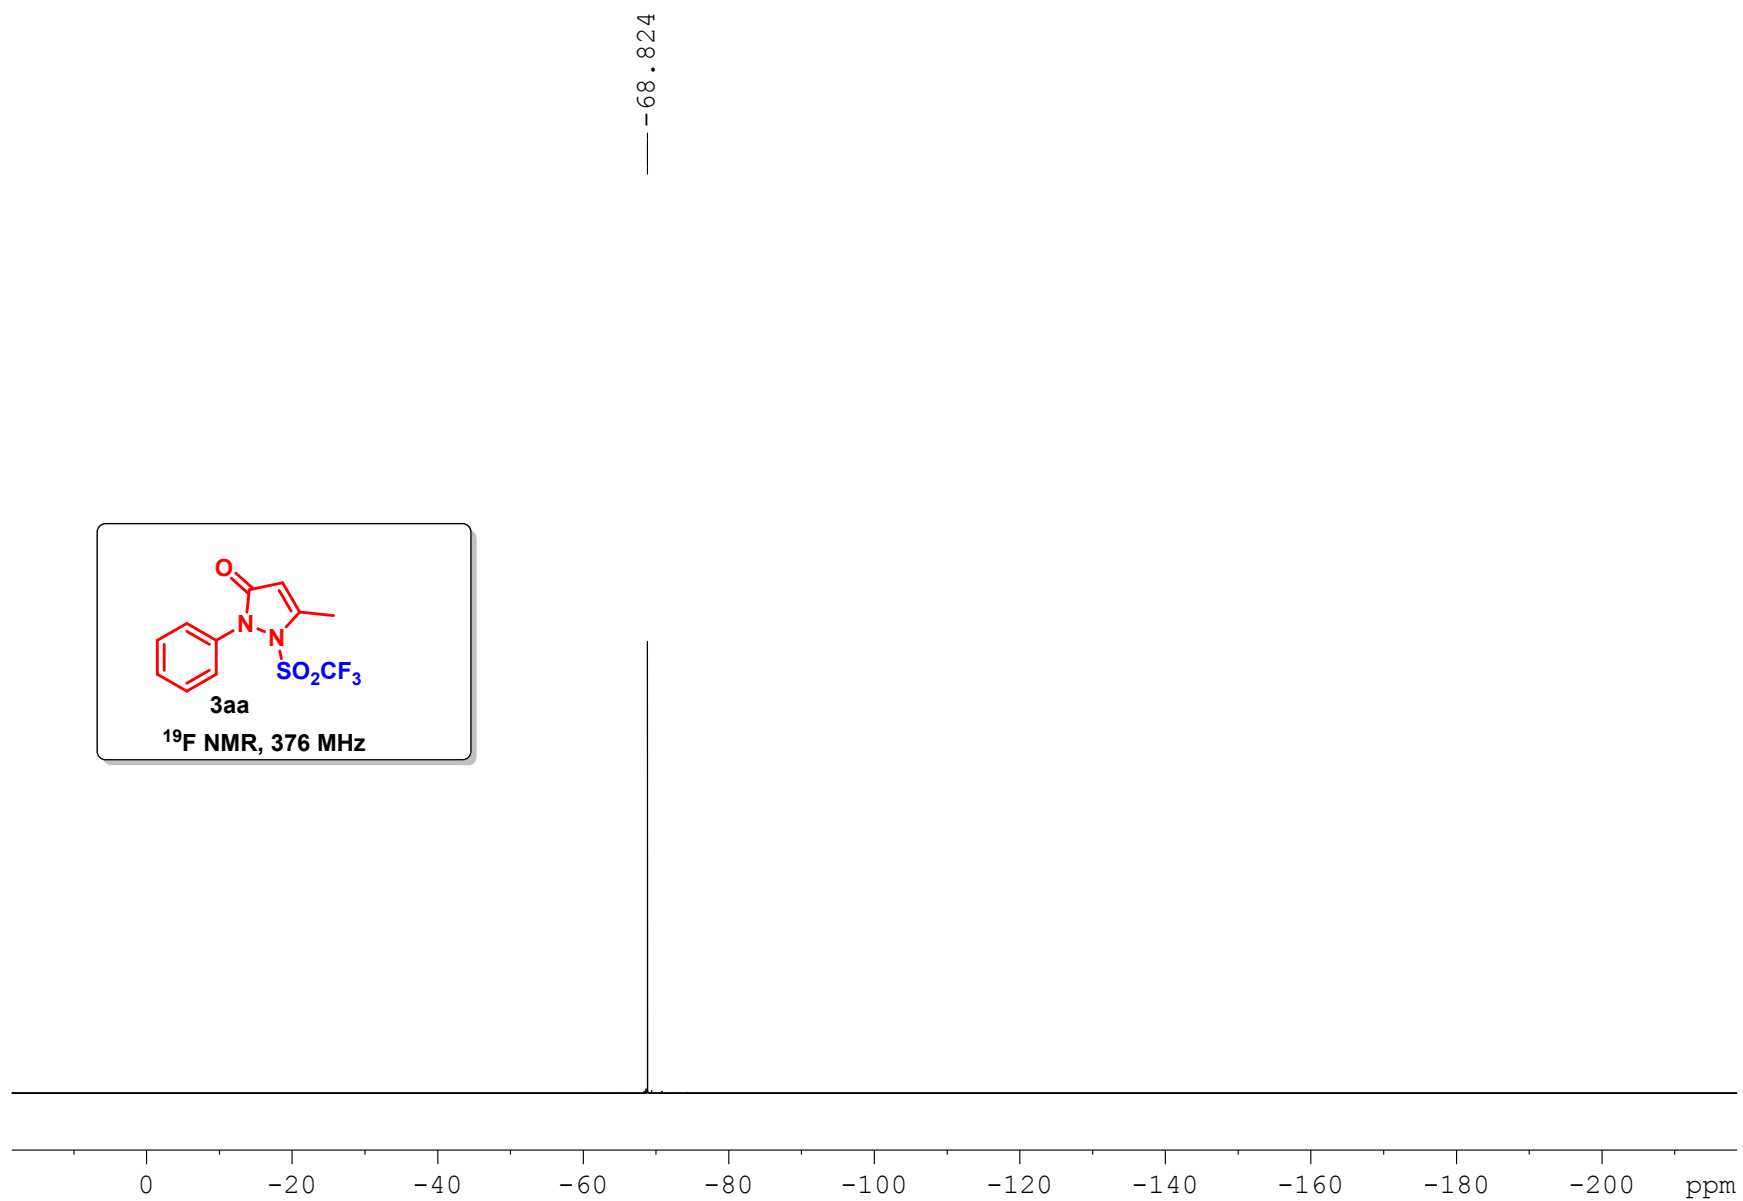

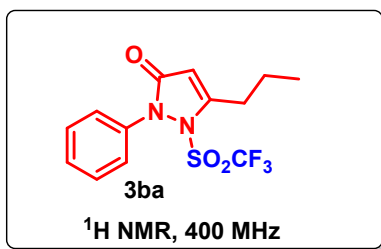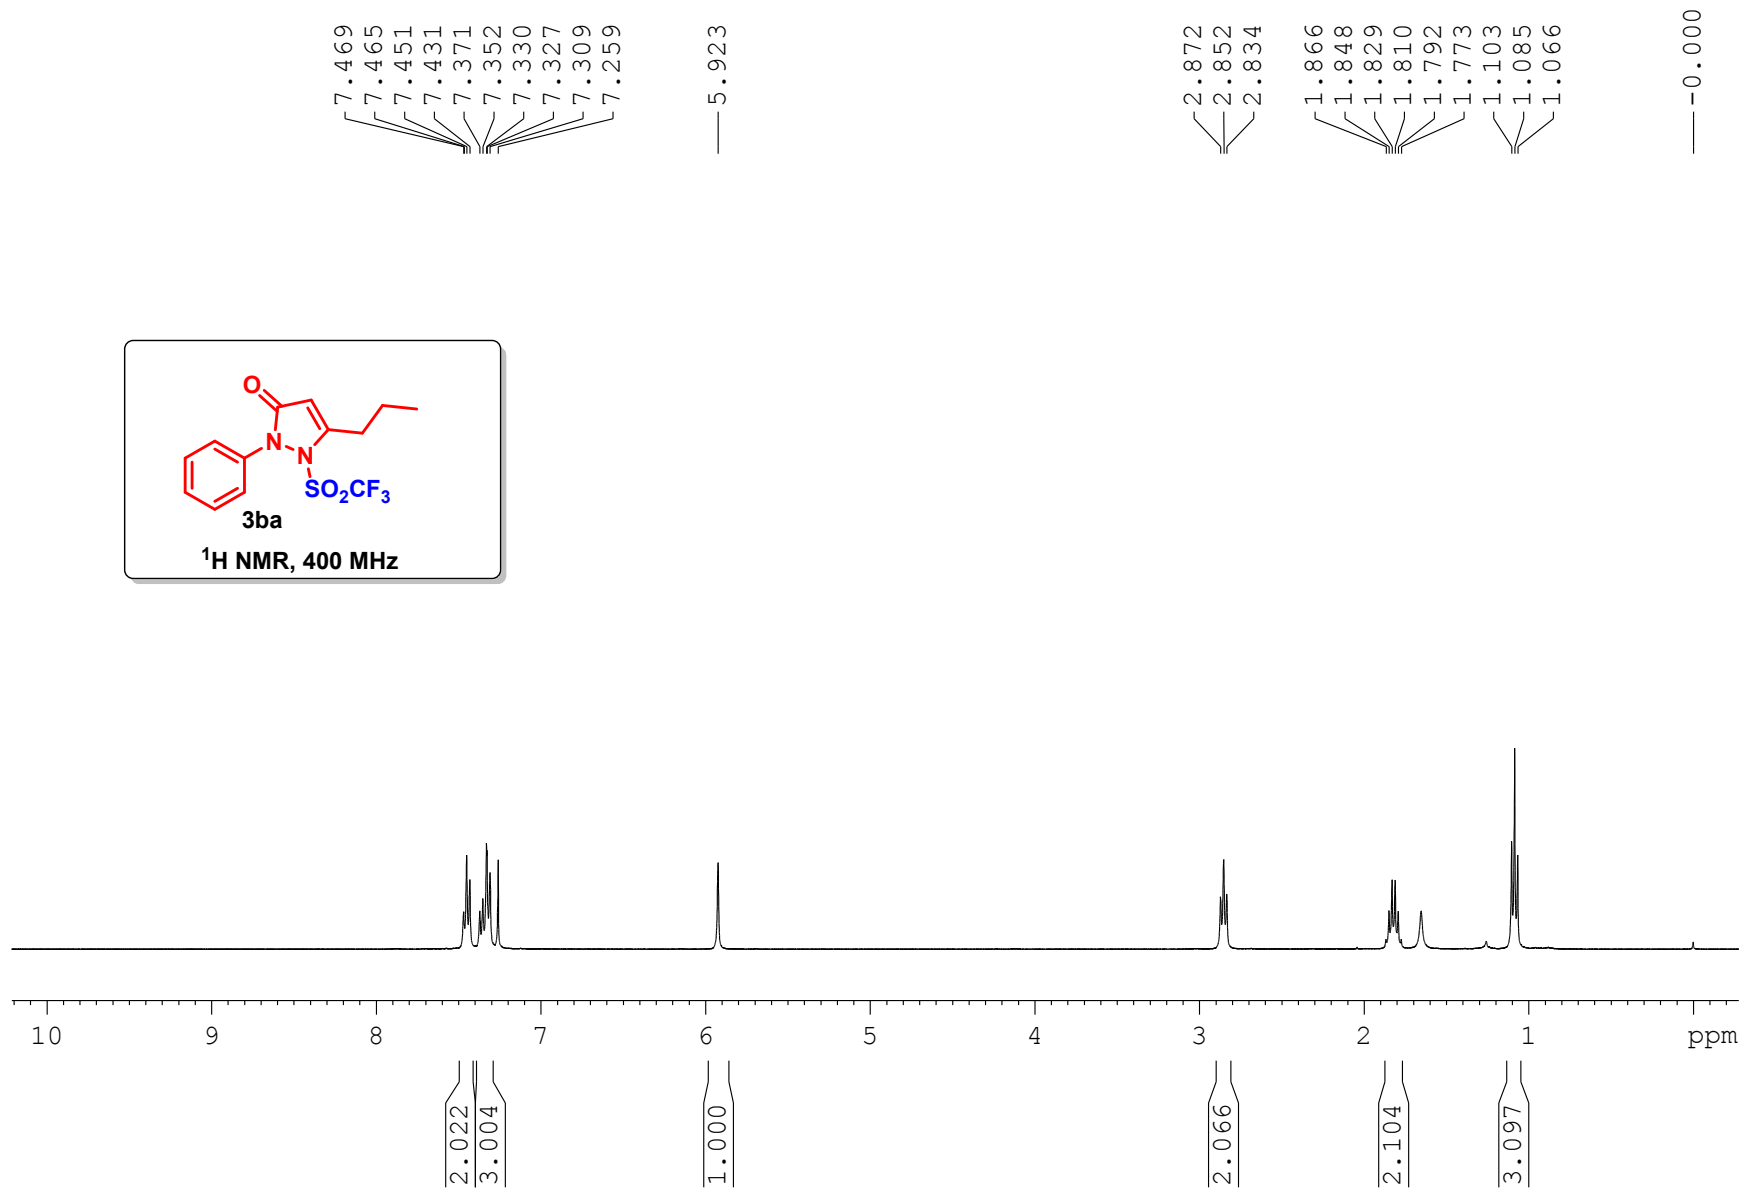

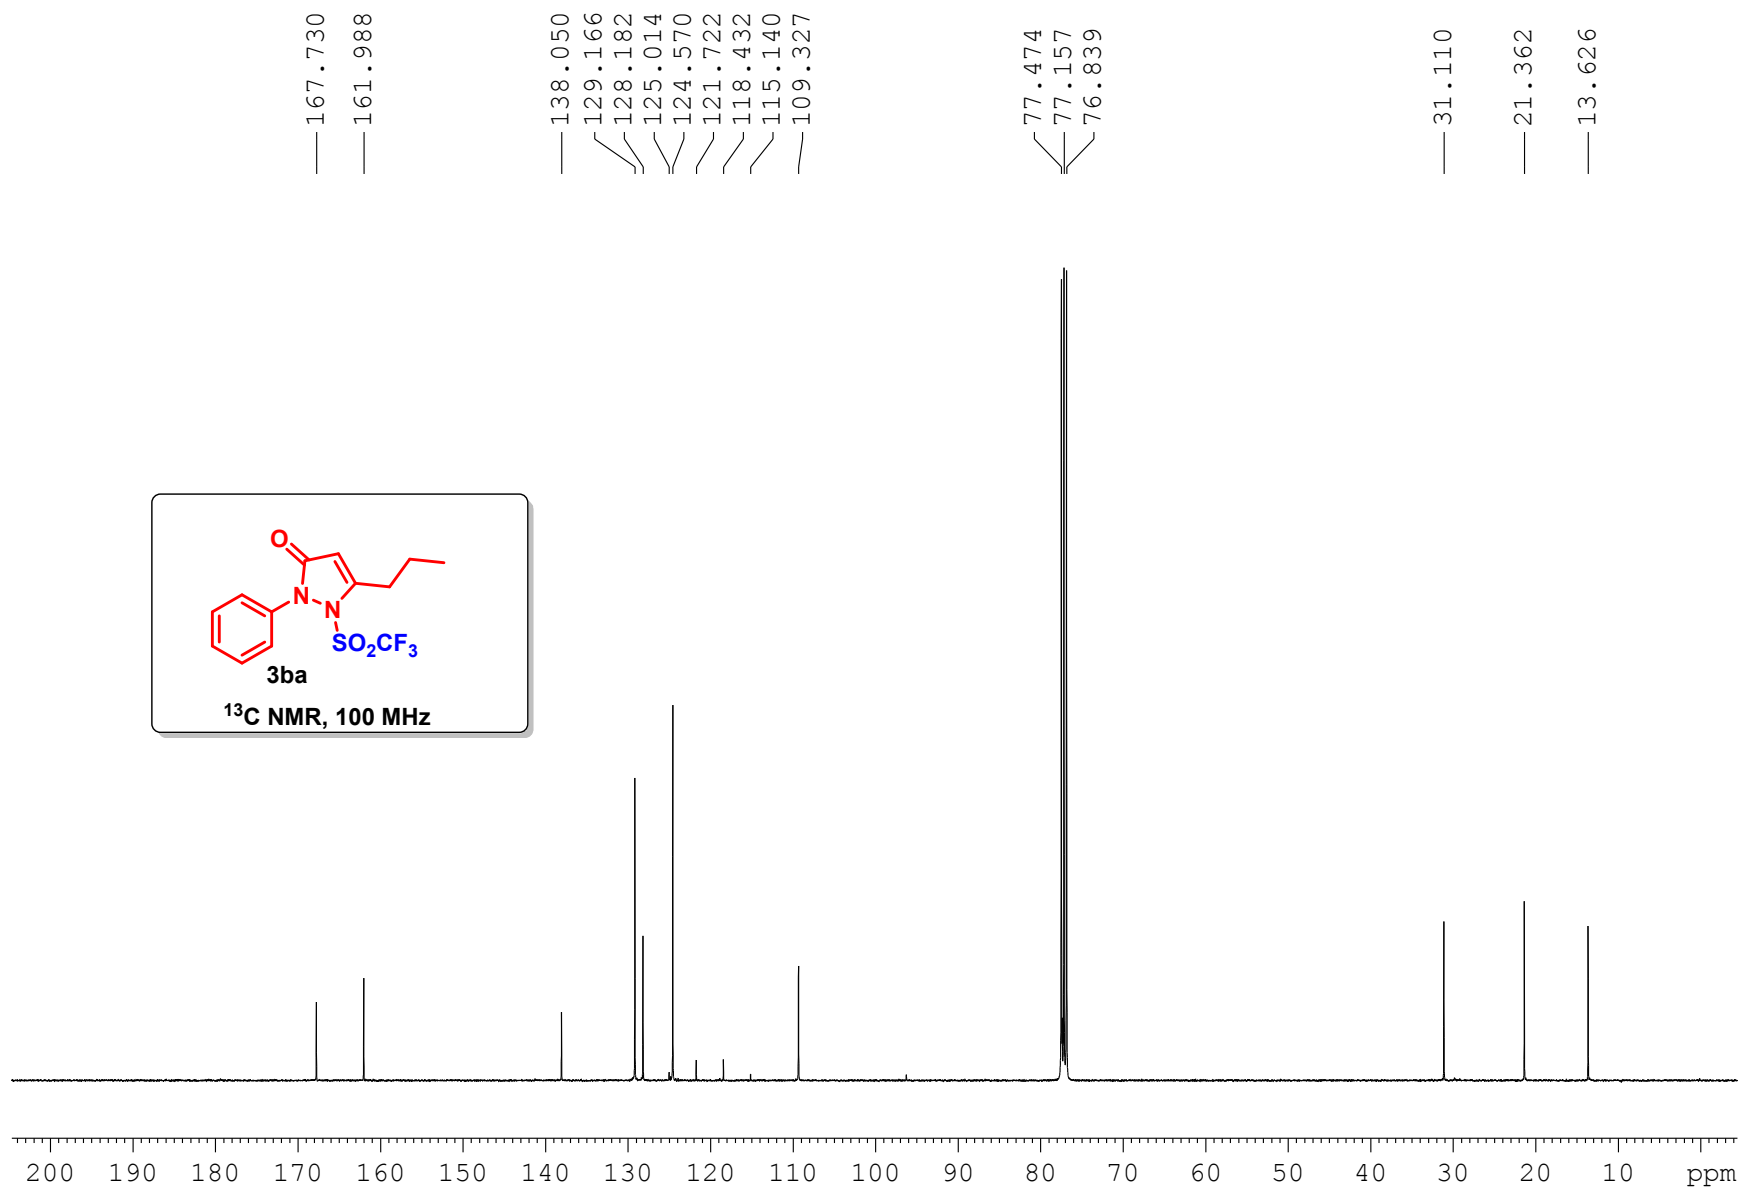

— -67.866

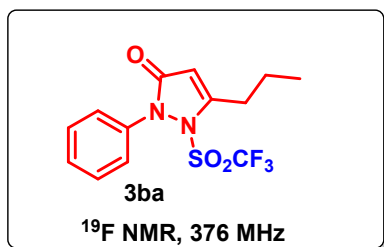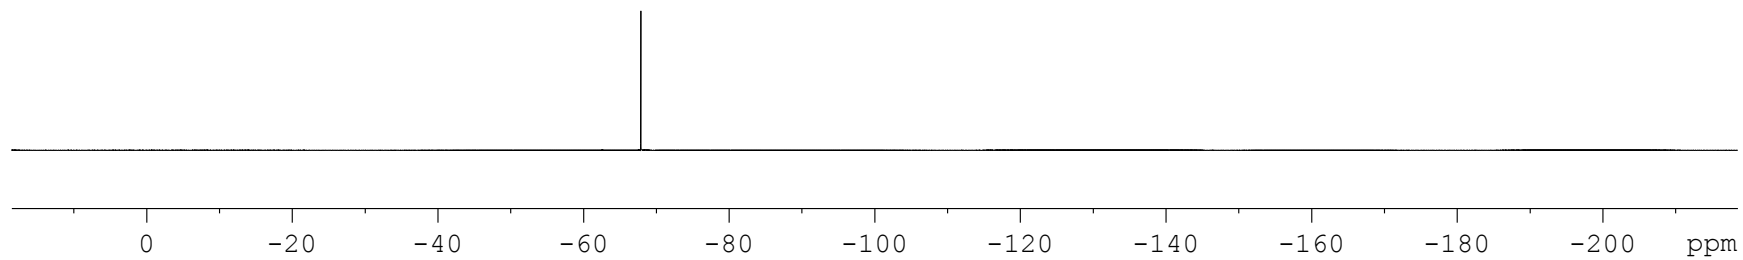

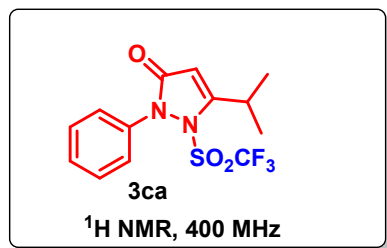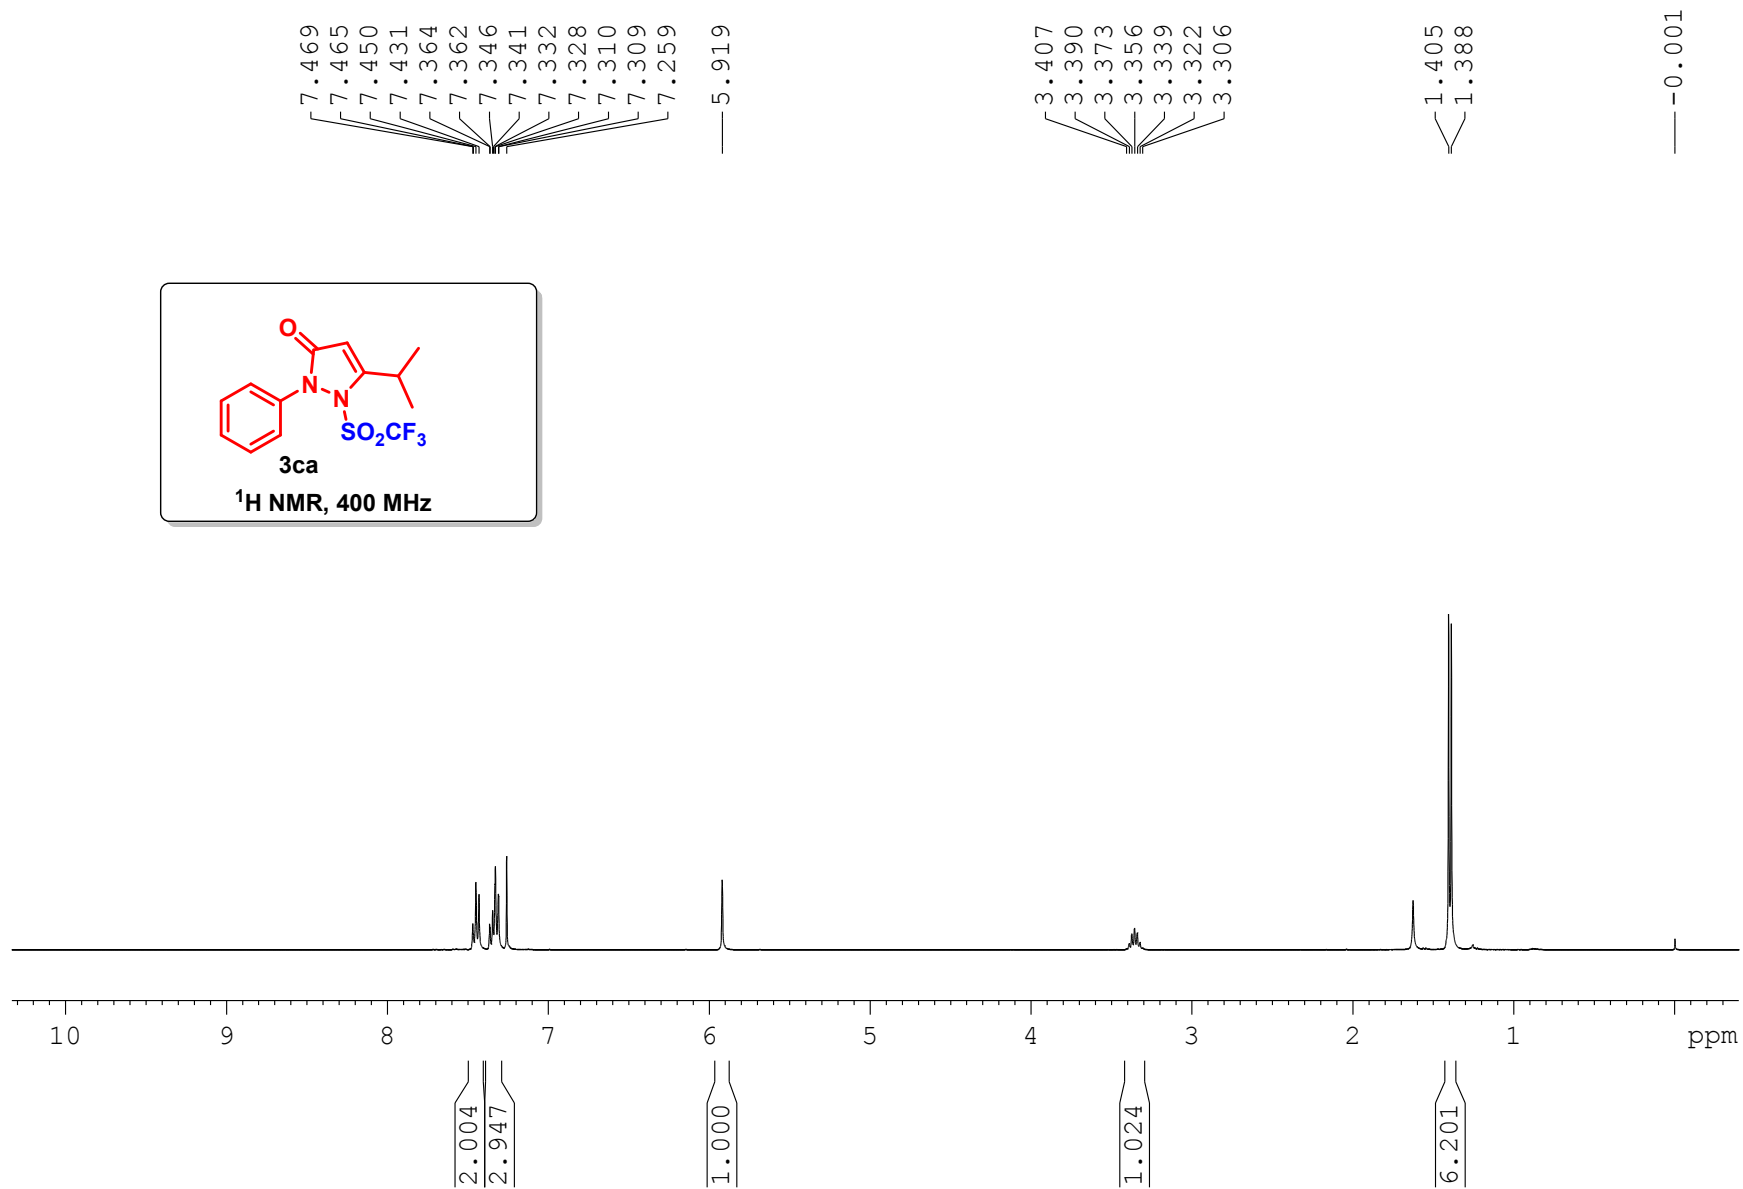

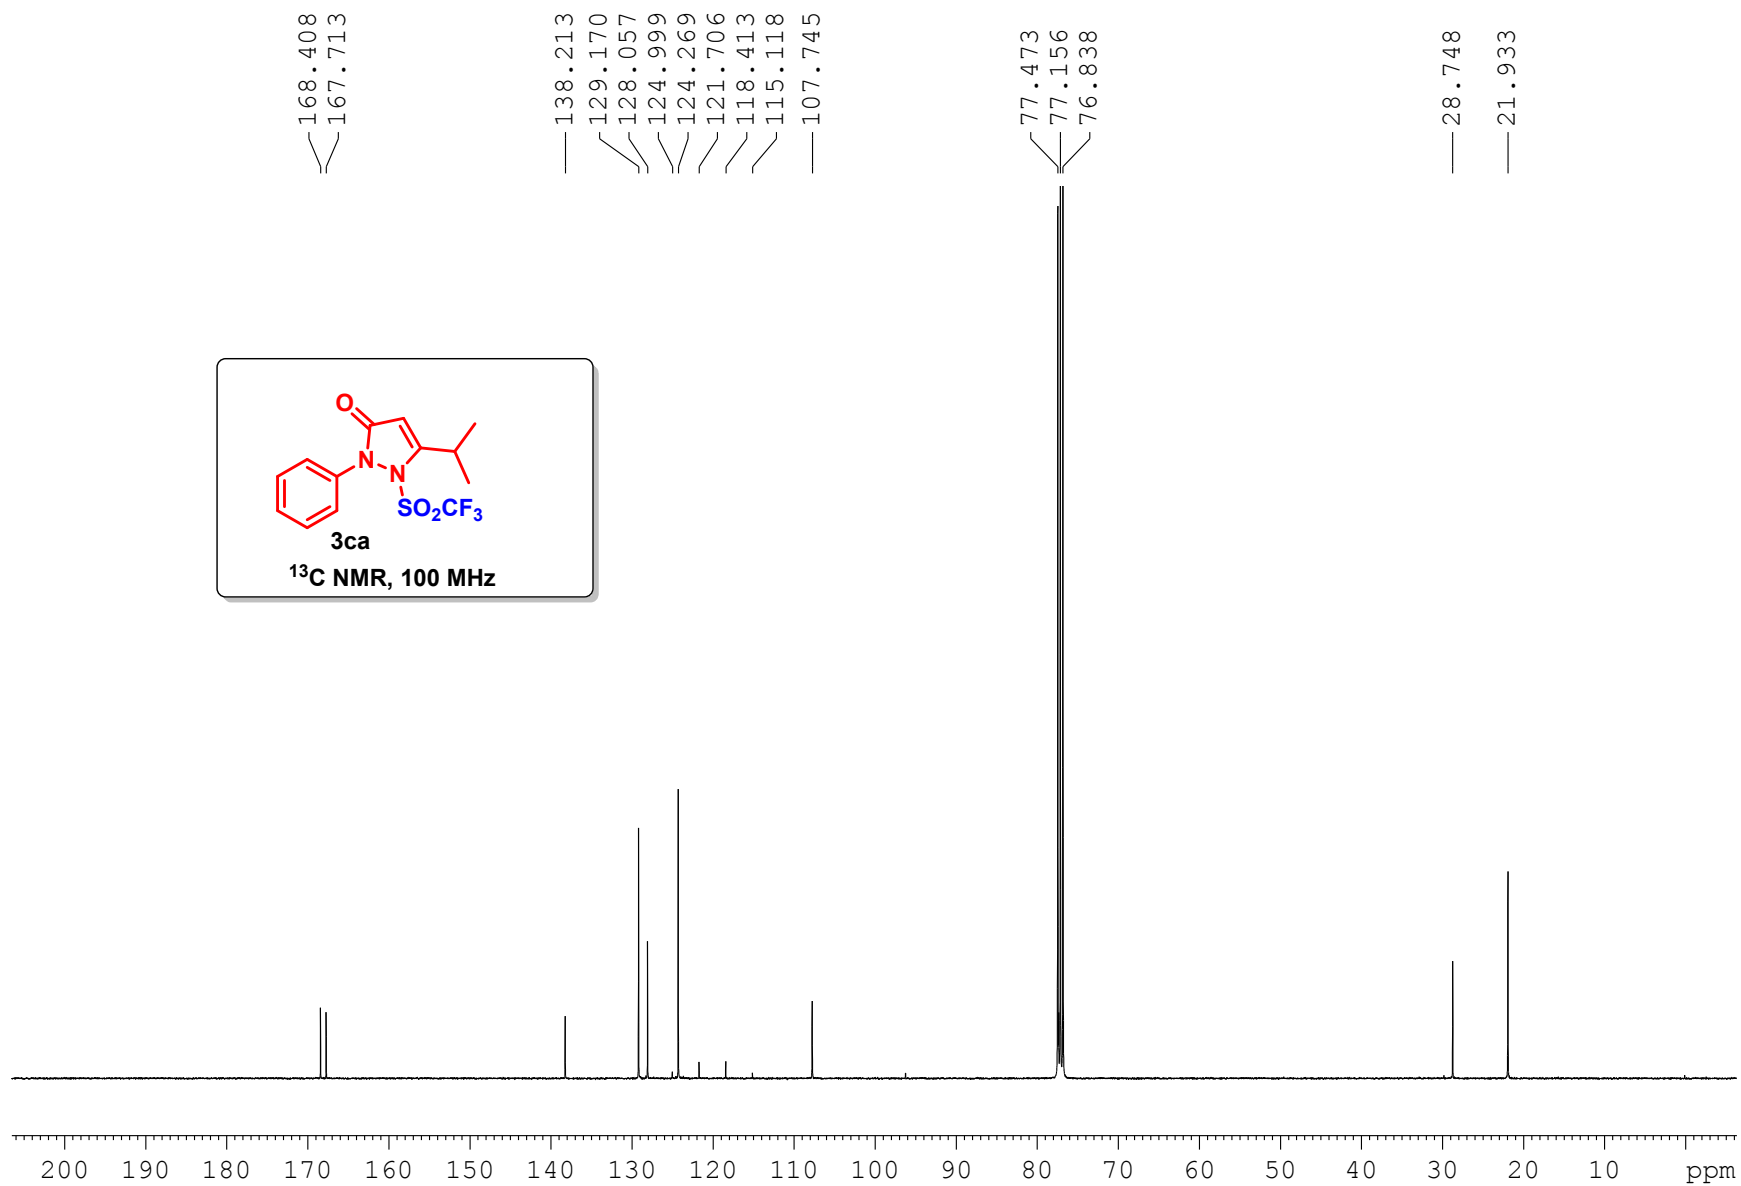

— -67.835

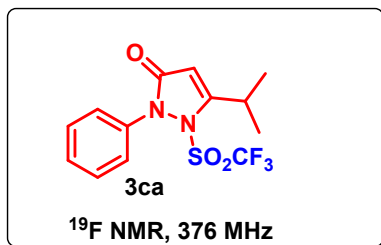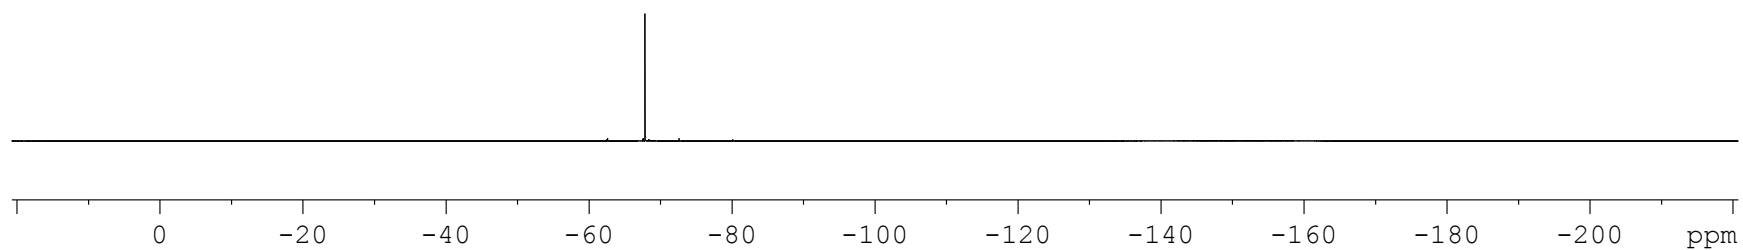



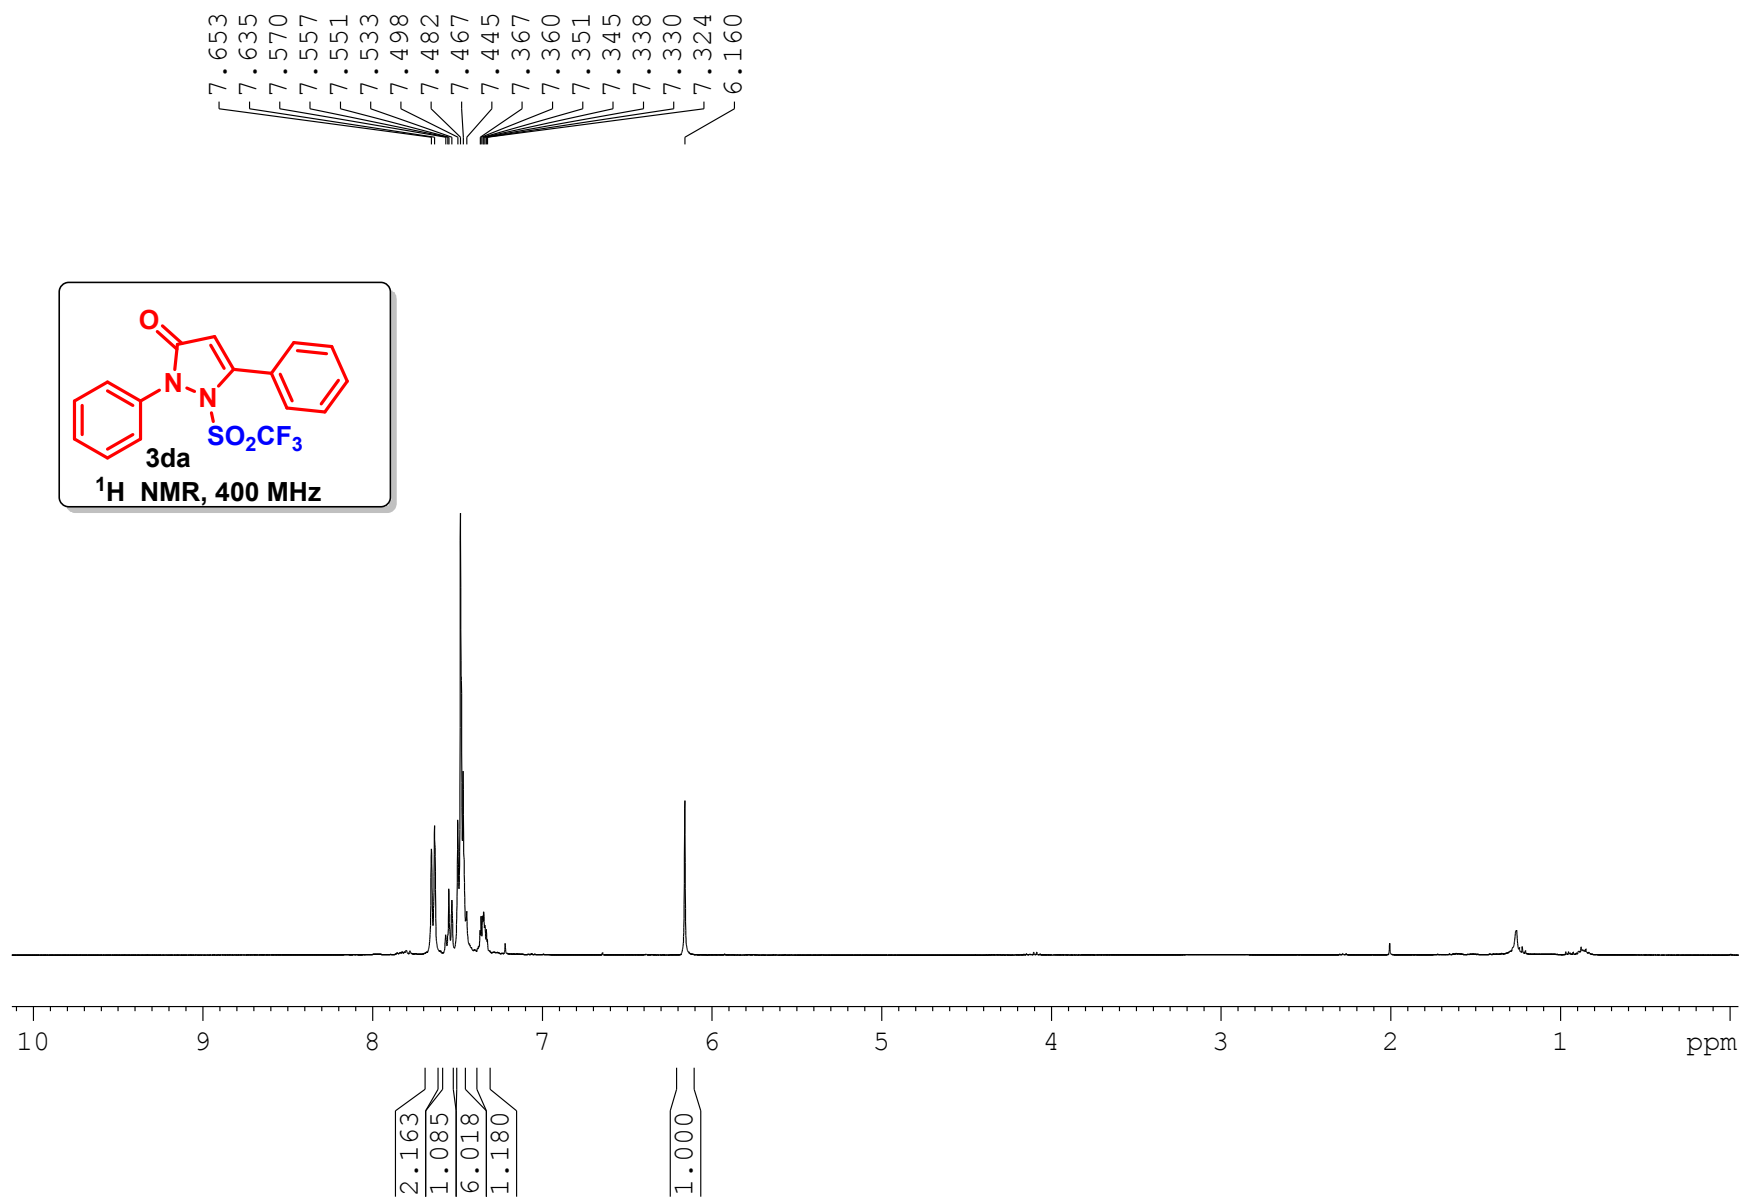

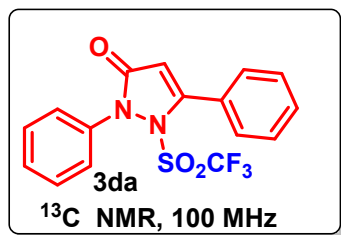

— 166.730

— 159.676

137.918  
 132.320  
 129.229  
 129.155  
 128.703  
 127.978  
 127.741  
 124.981  
 124.107  
 121.680  
 118.377  
 115.074  
 110.210

77.474  
 77.156  
 76.838

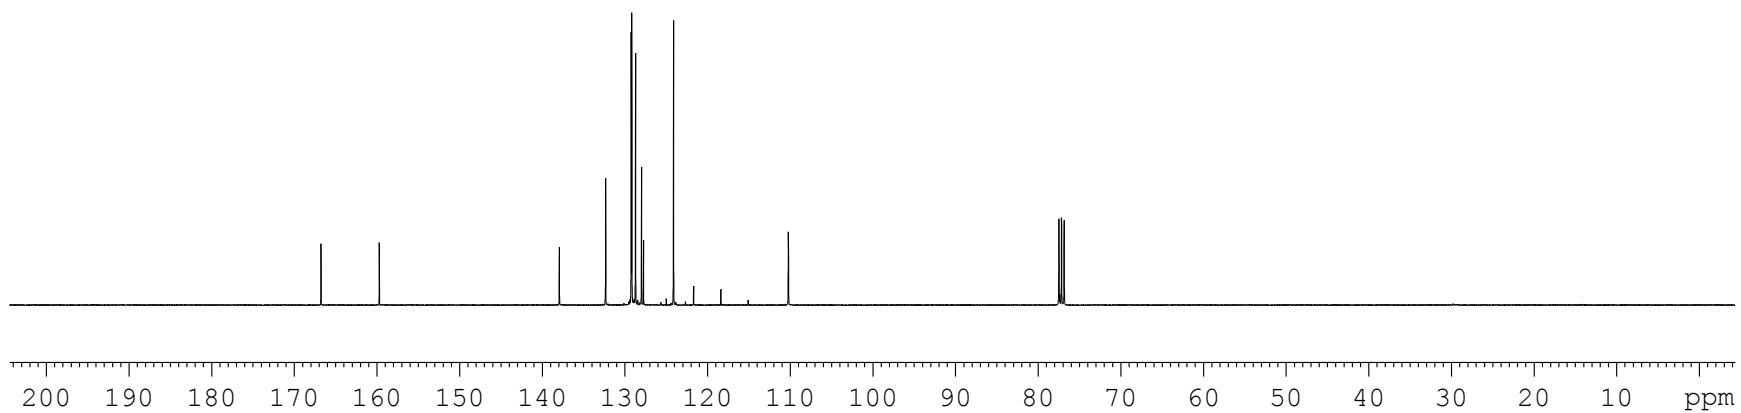

---66.288

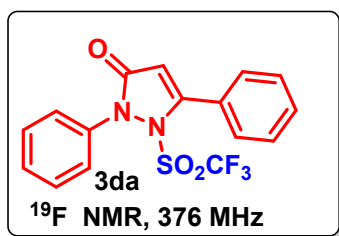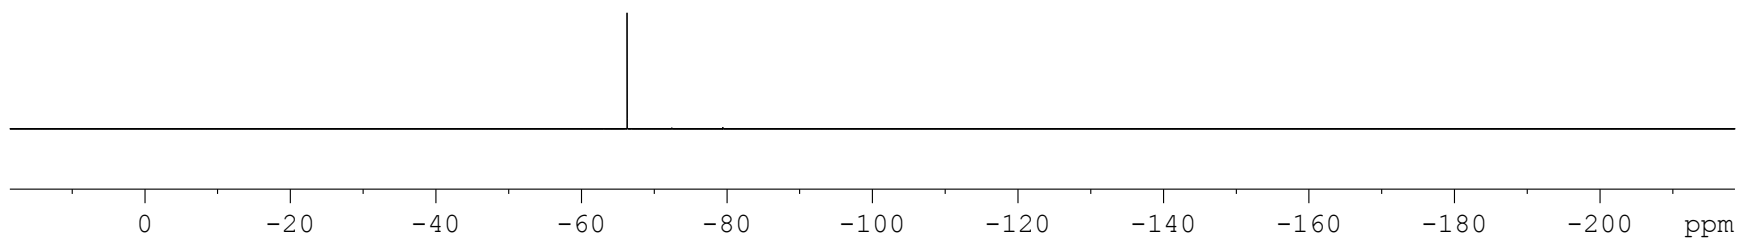

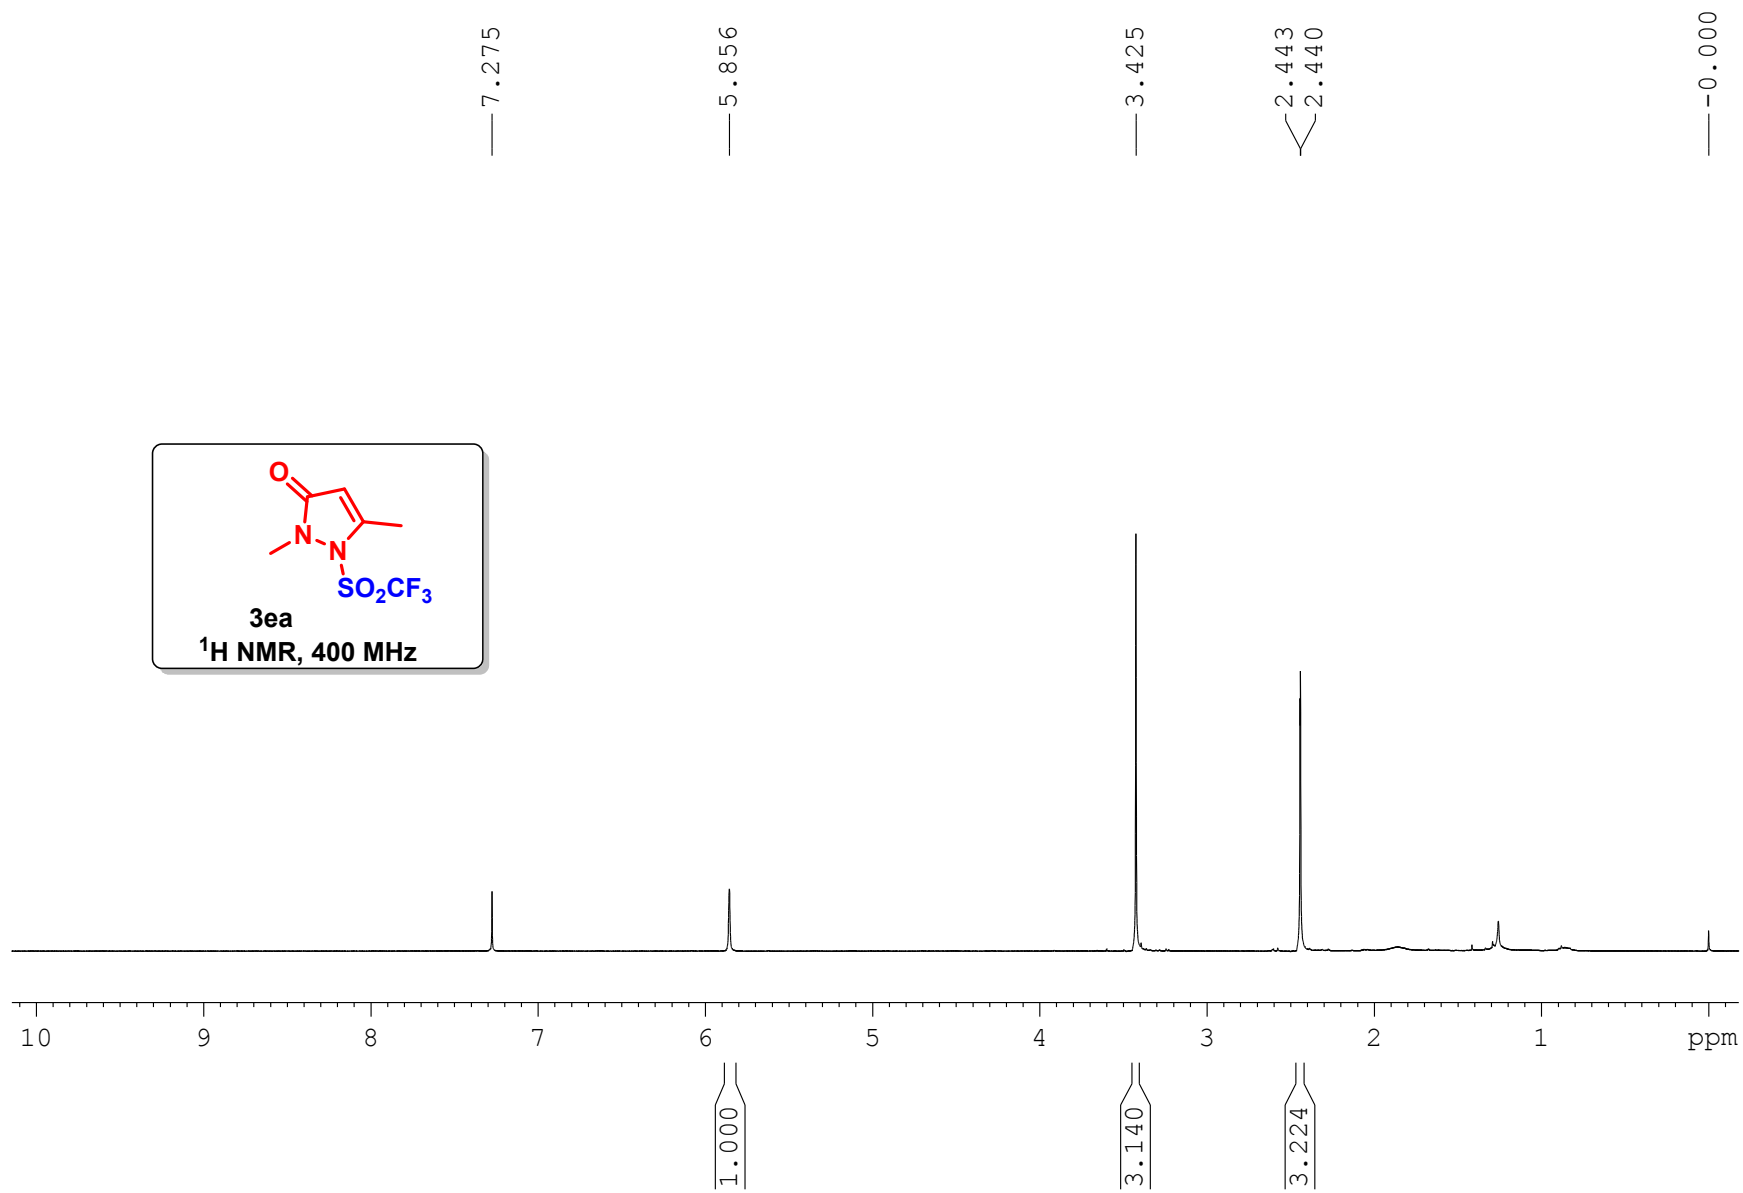

169.033

156.143

124.849

121.569

118.288

115.008

110.454

77.475

77.157

76.838

35.964

15.391

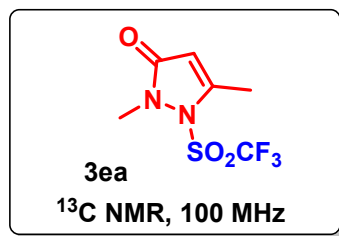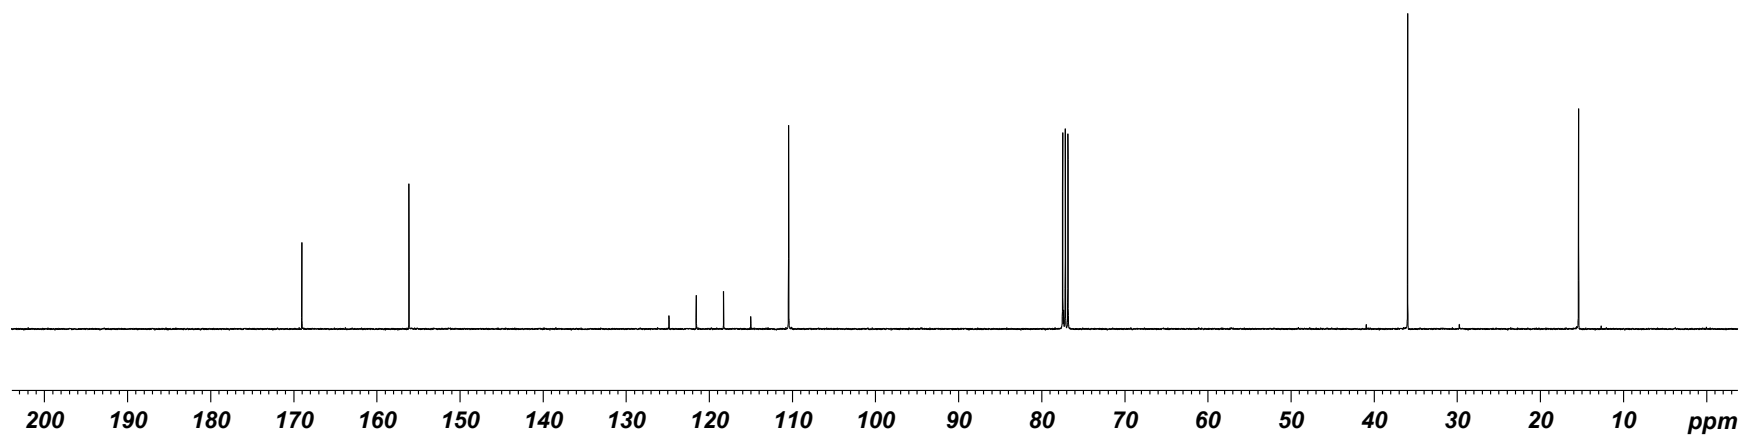

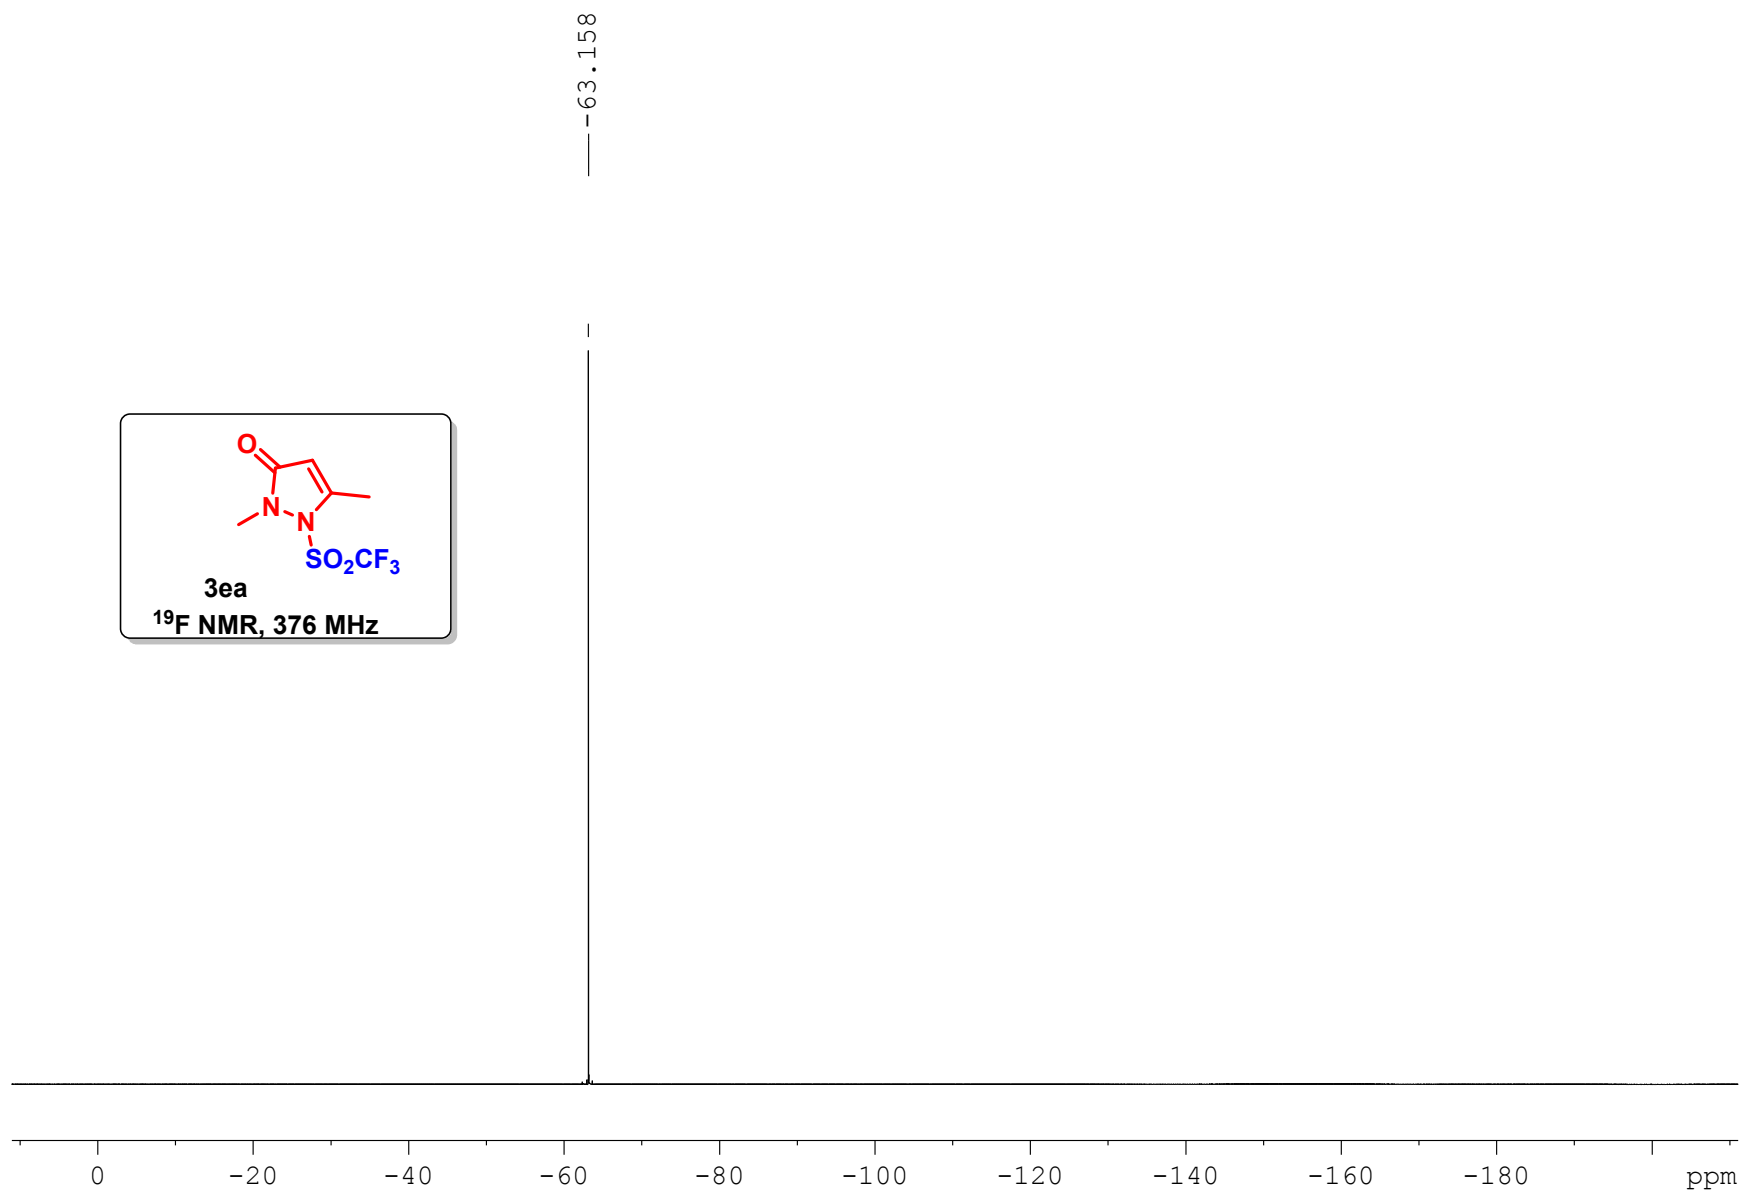

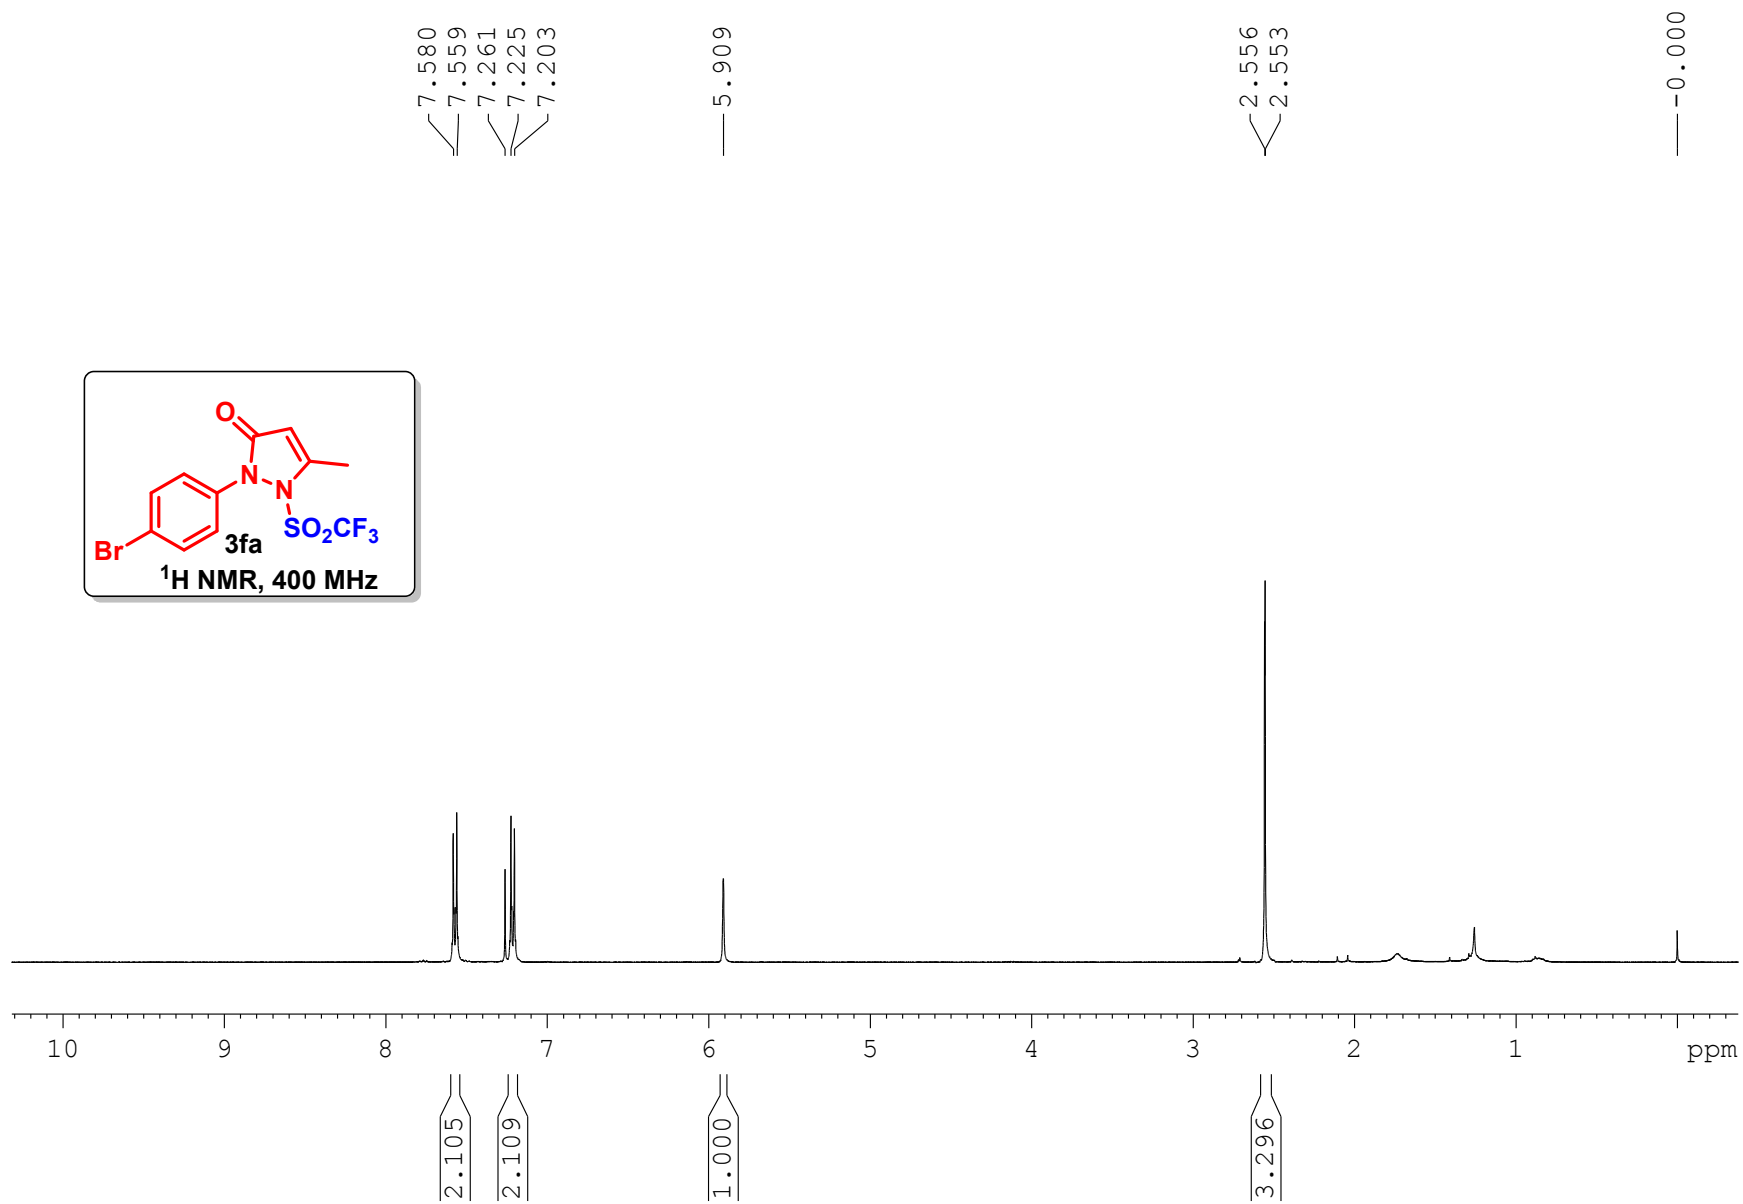

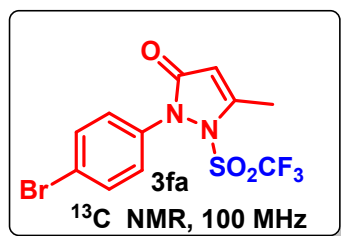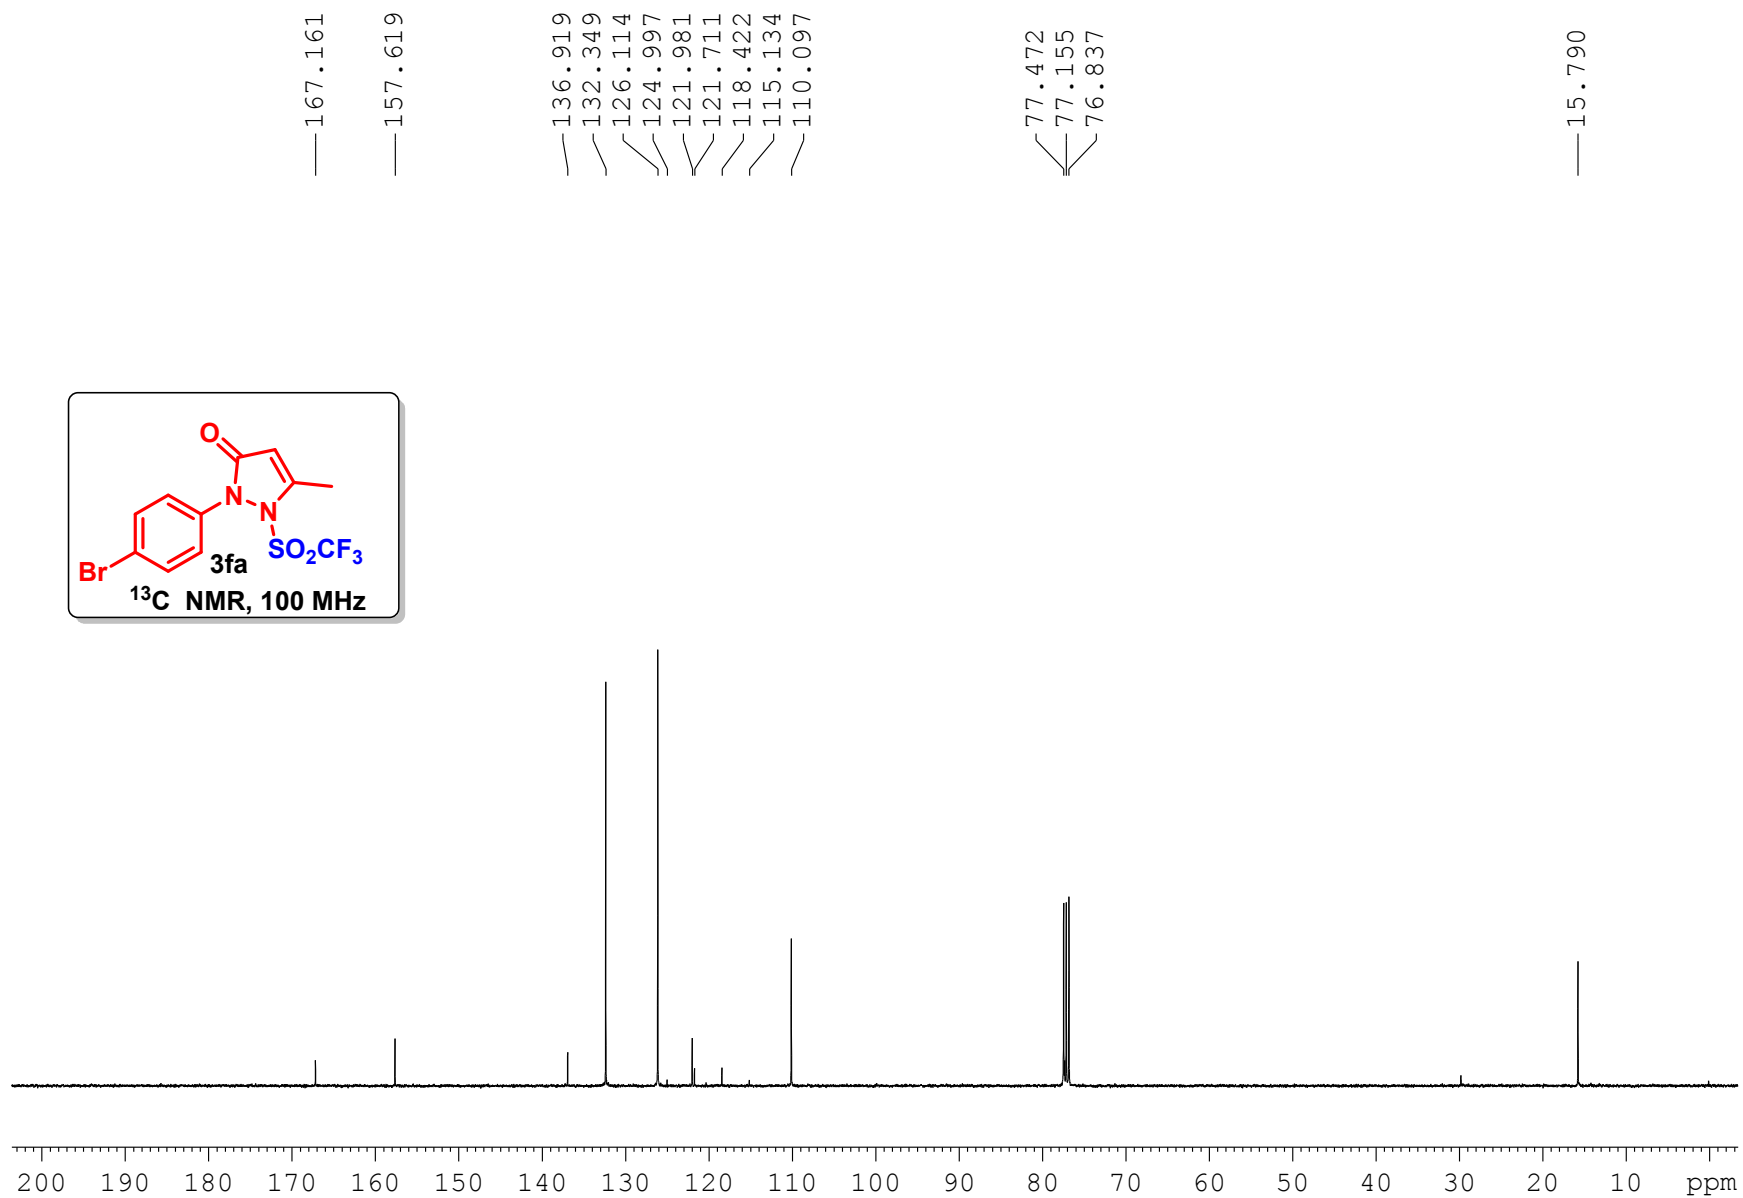



— -68.004

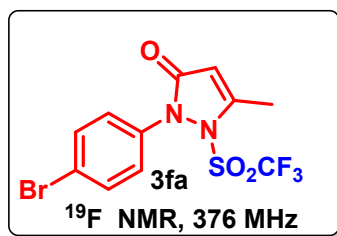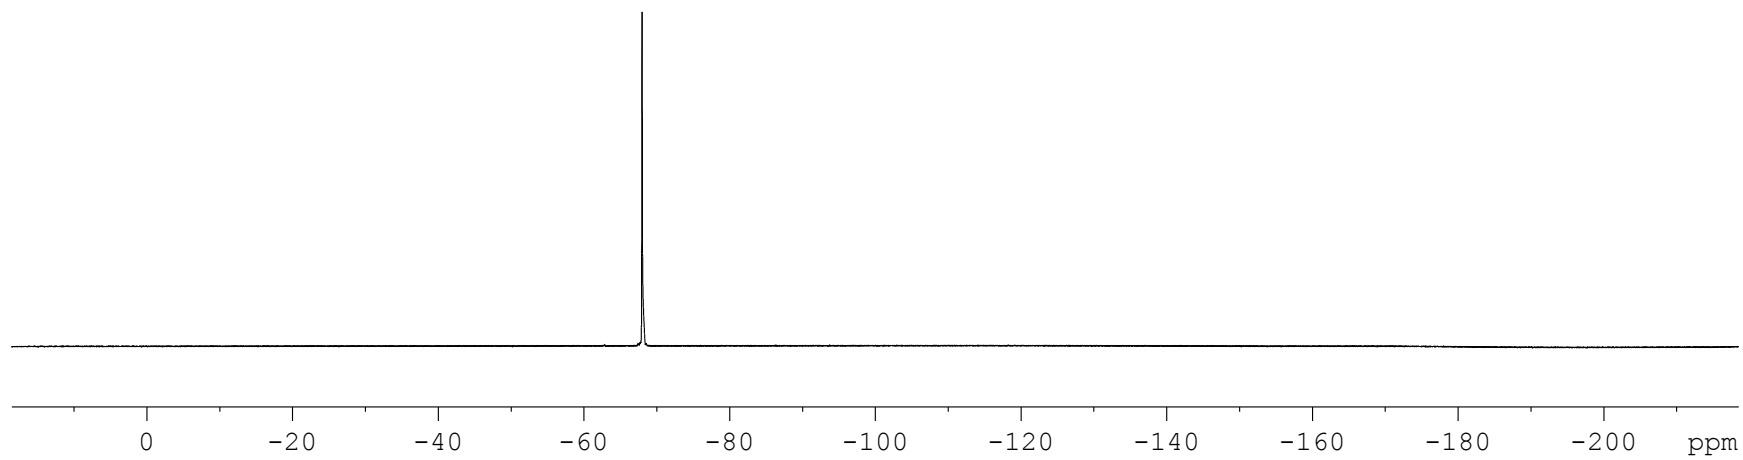

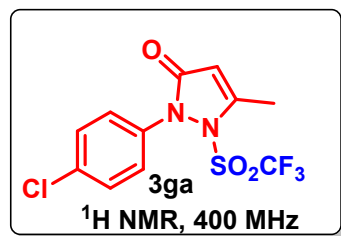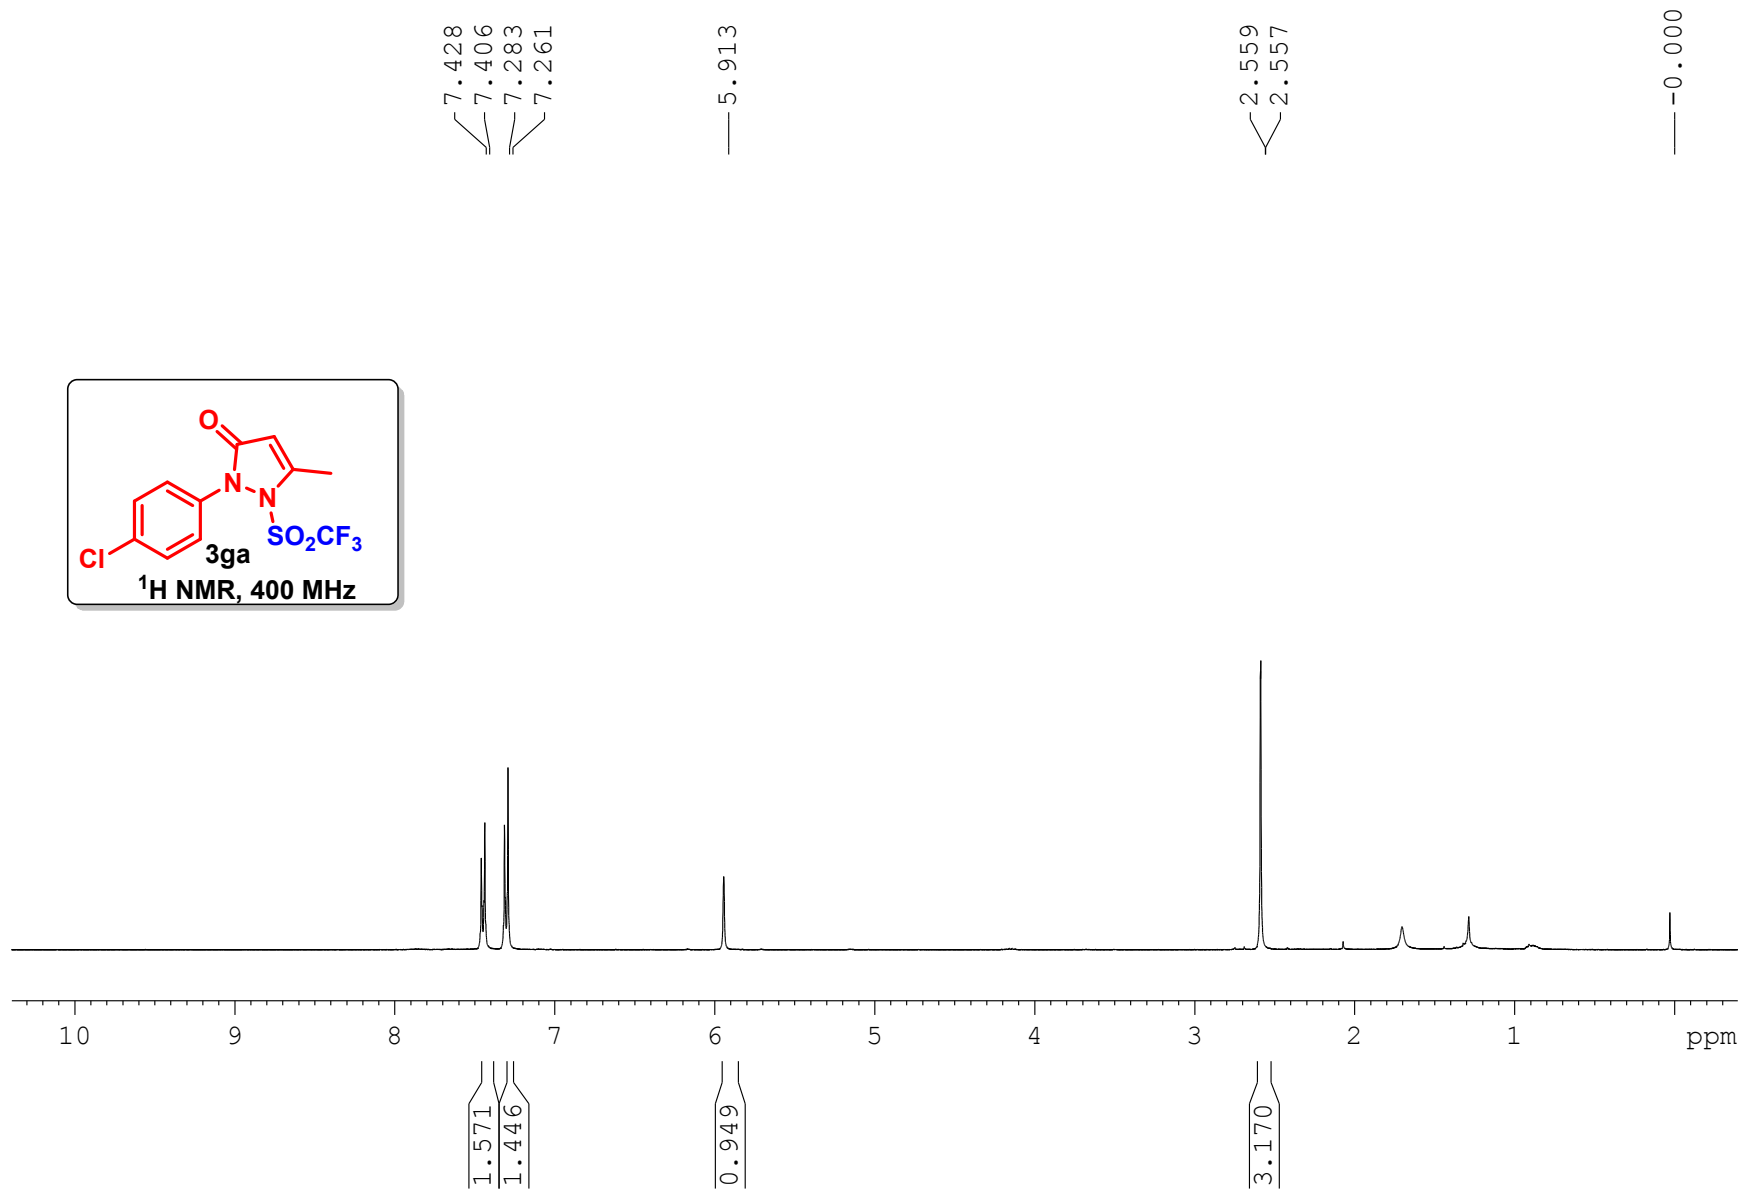

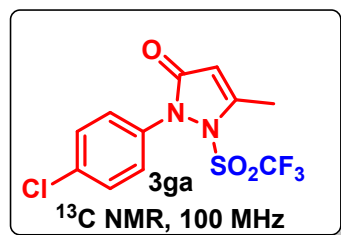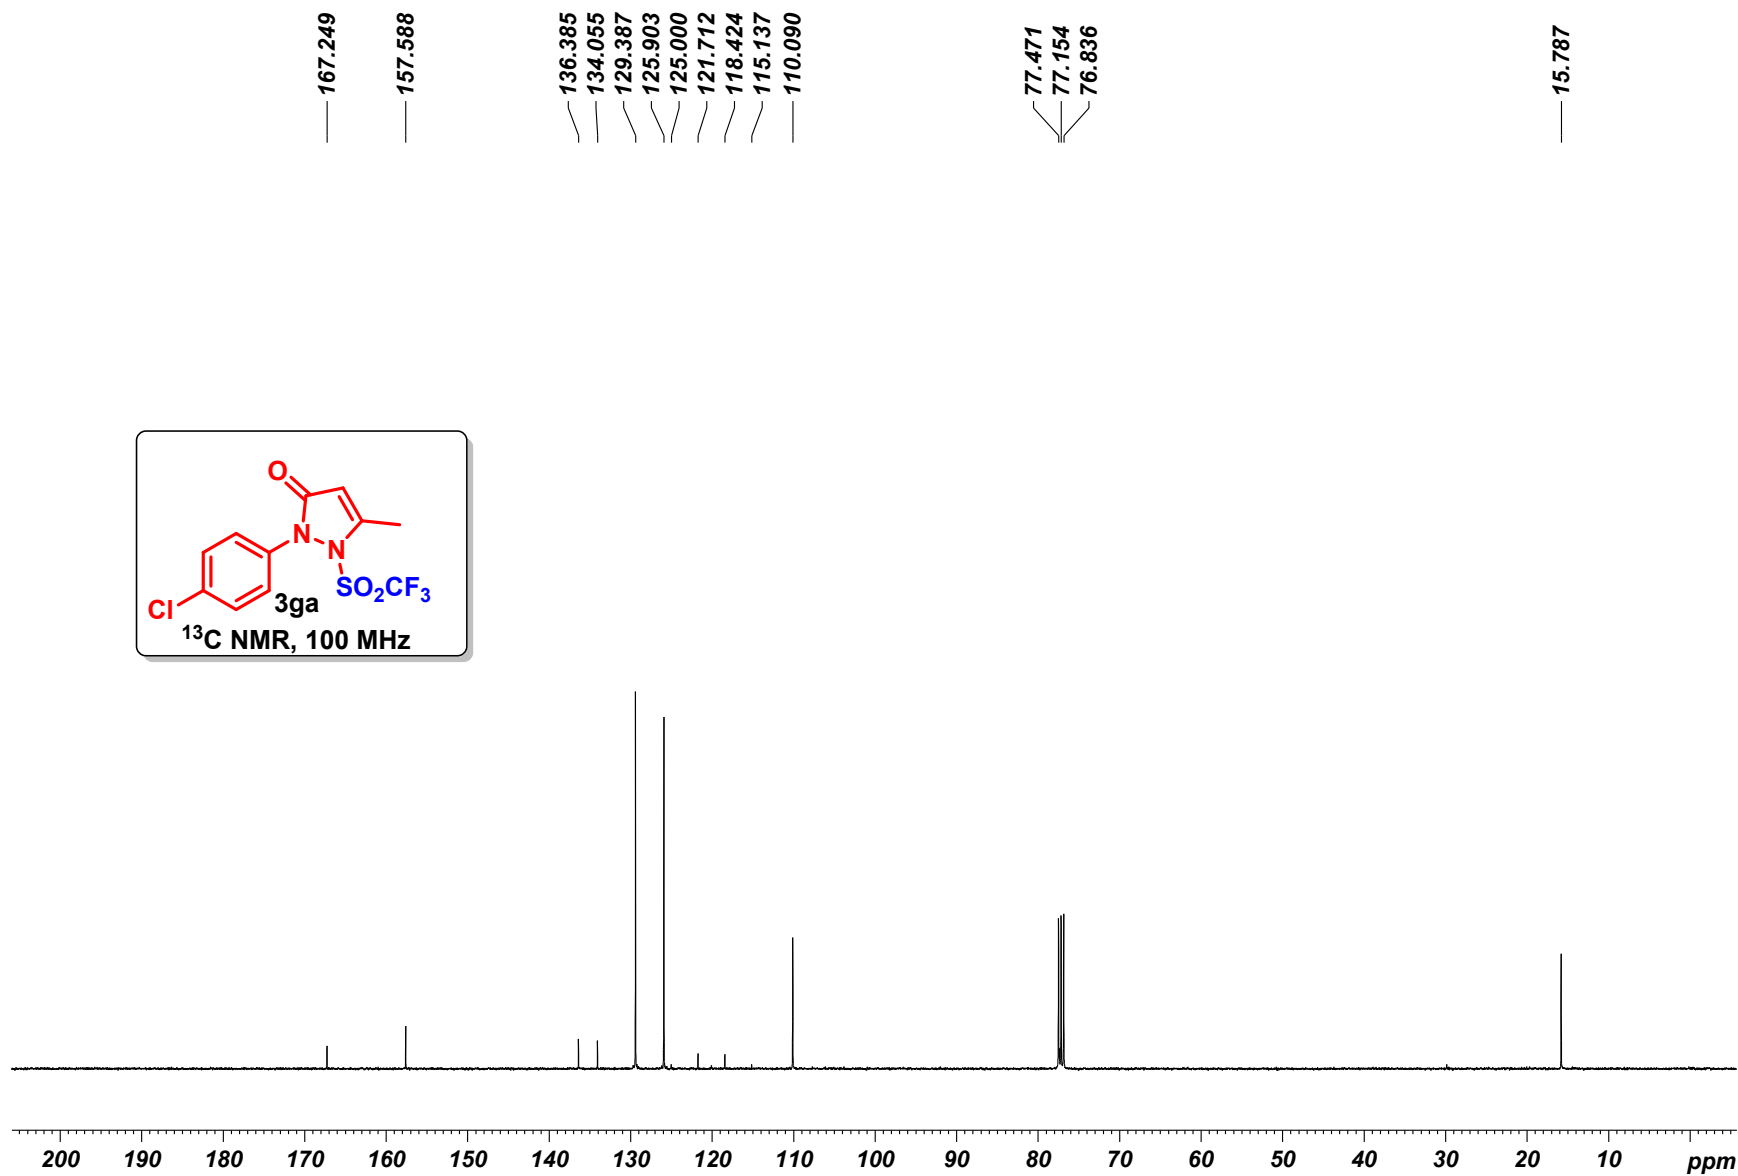

— -68.030

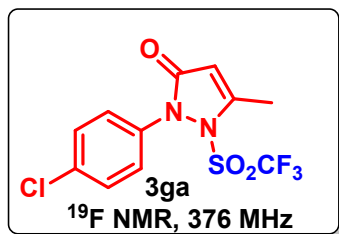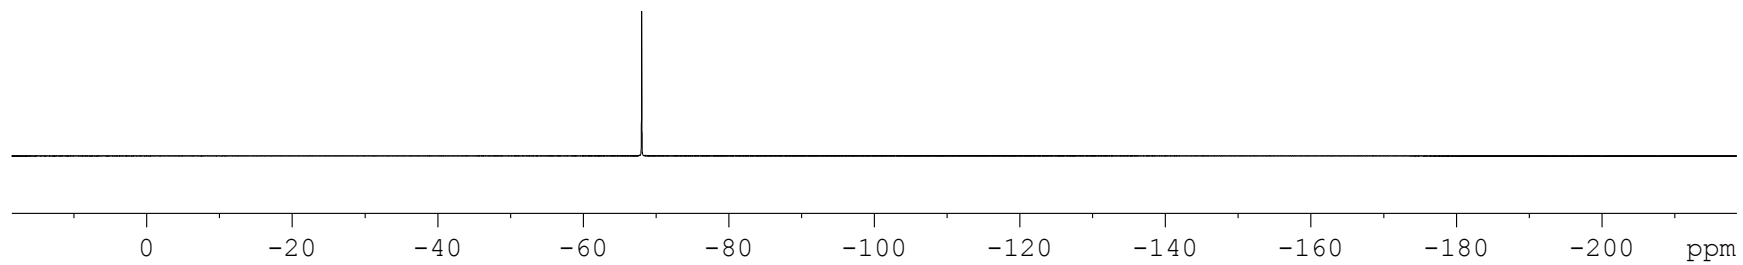

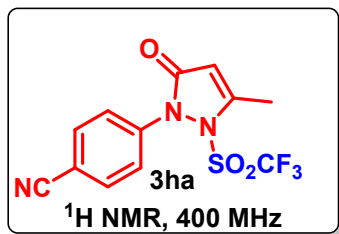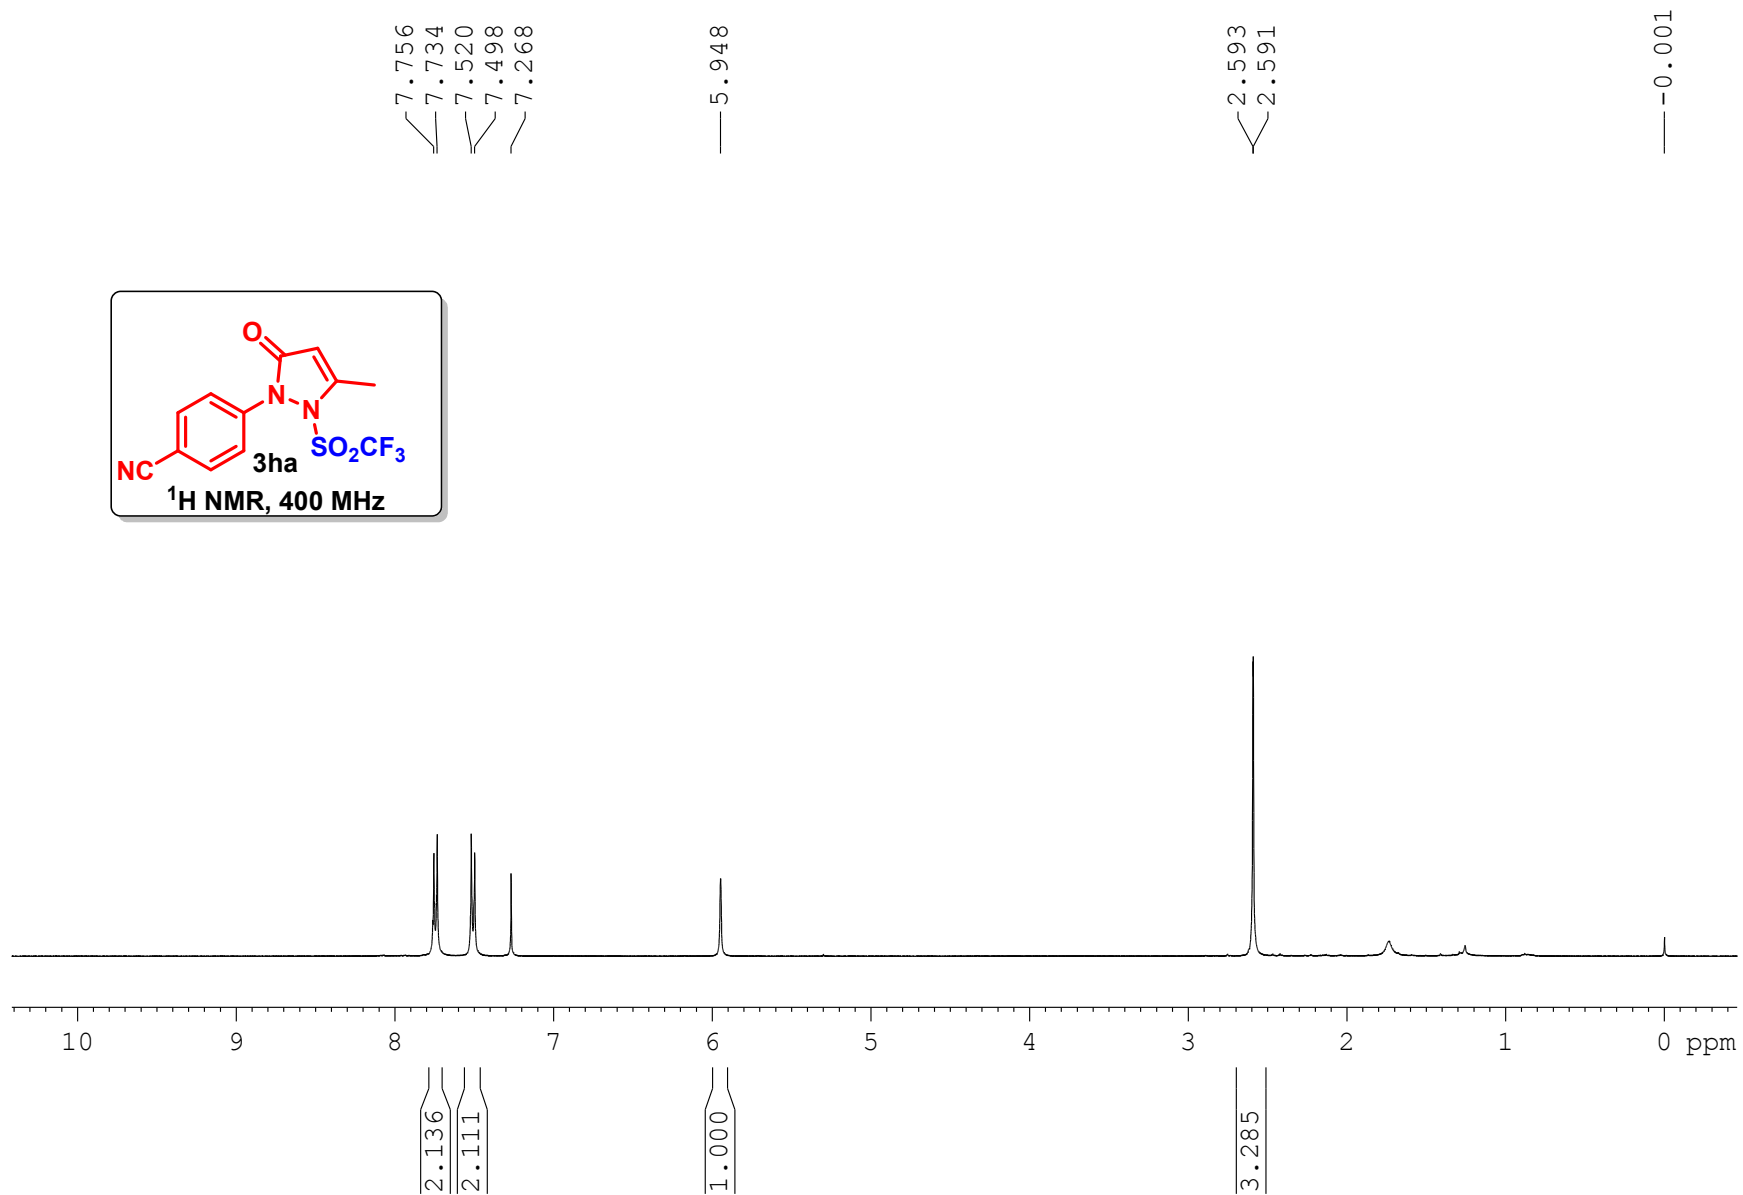

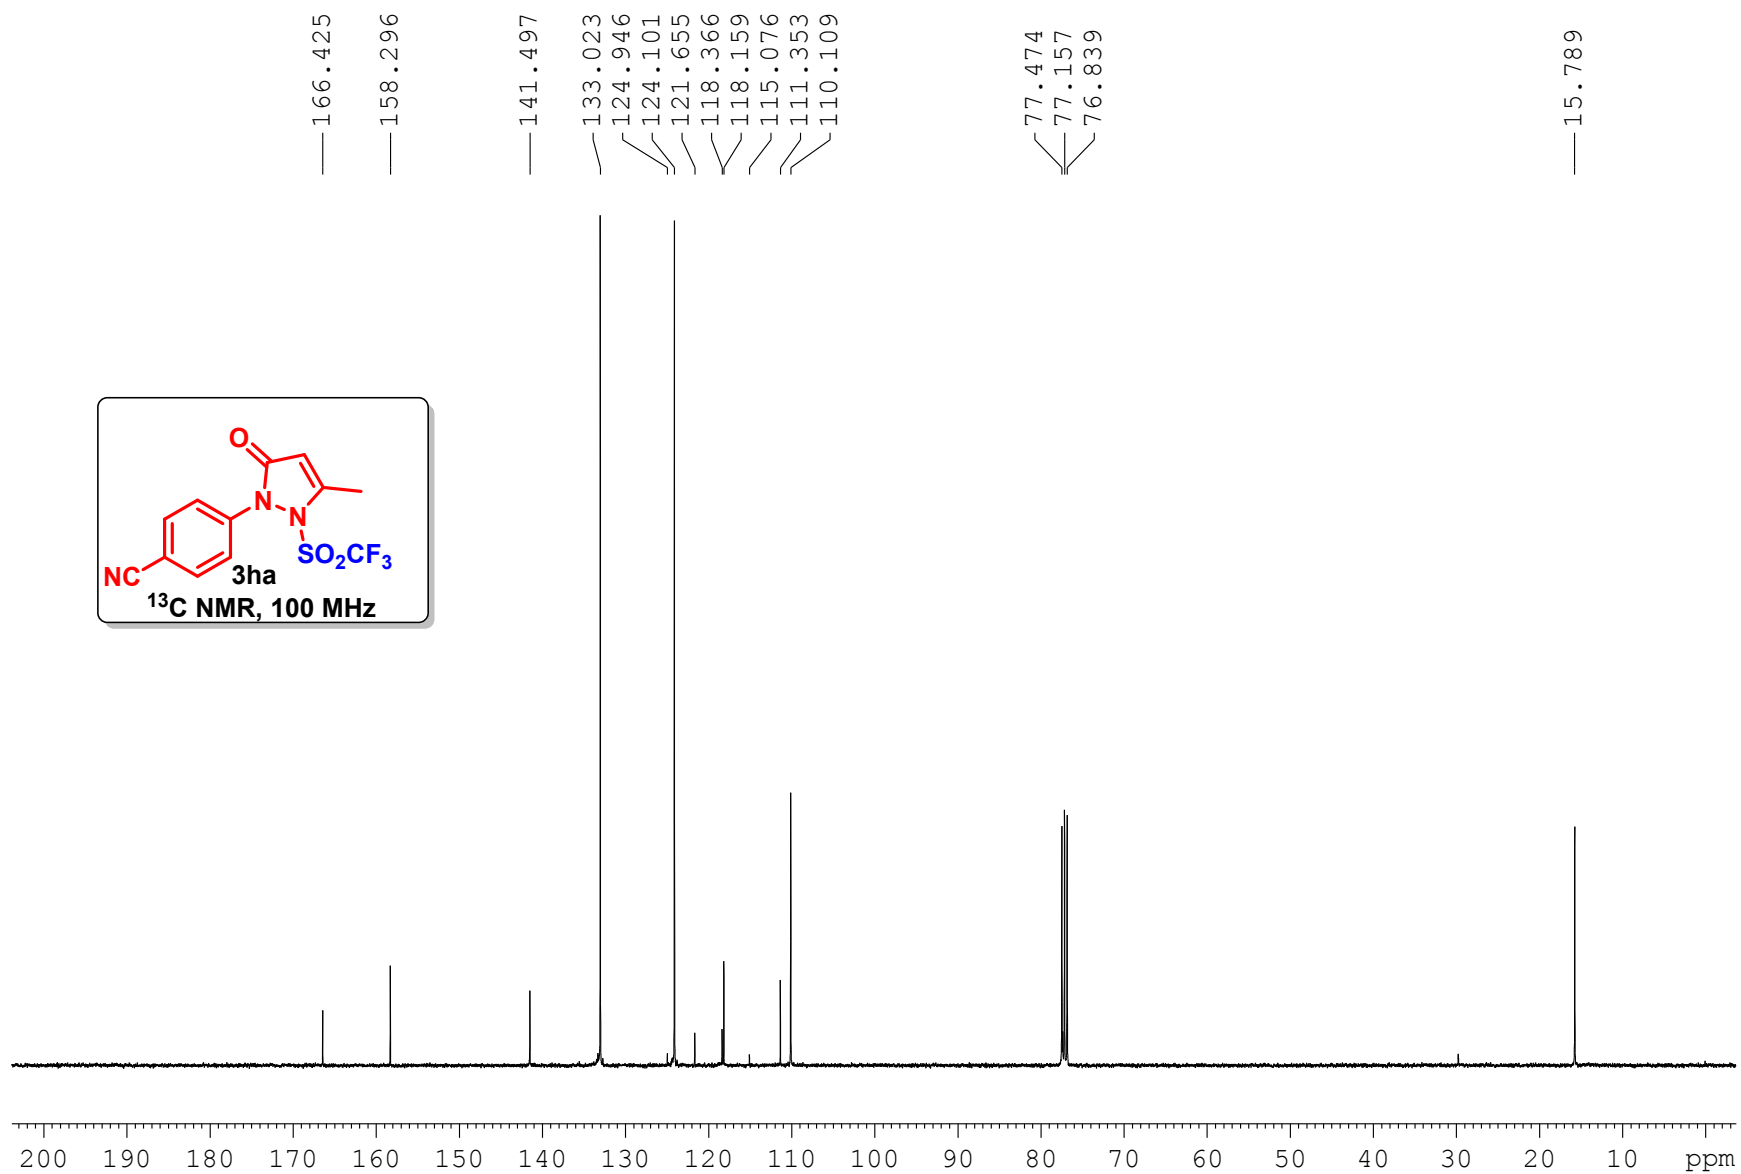

— -67.666

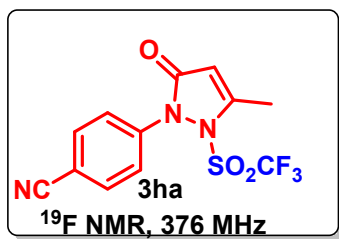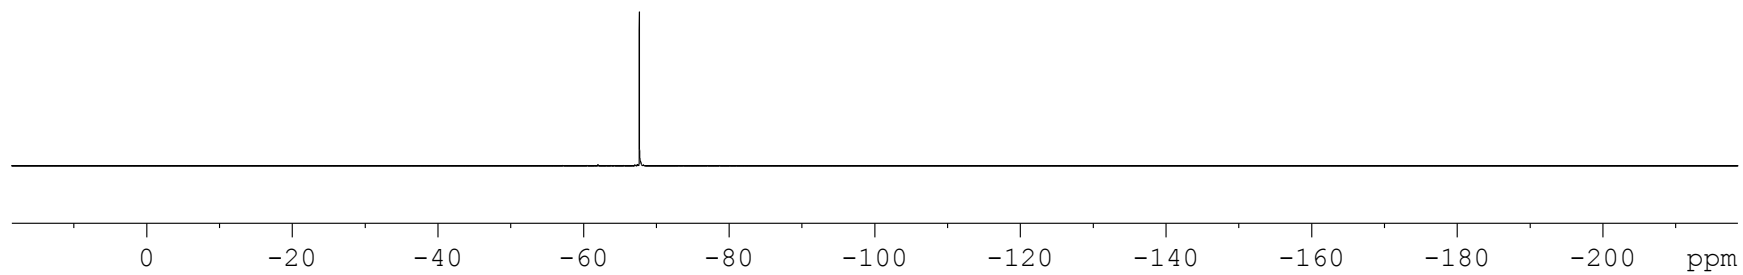

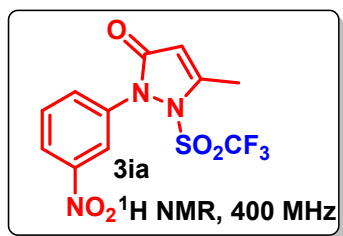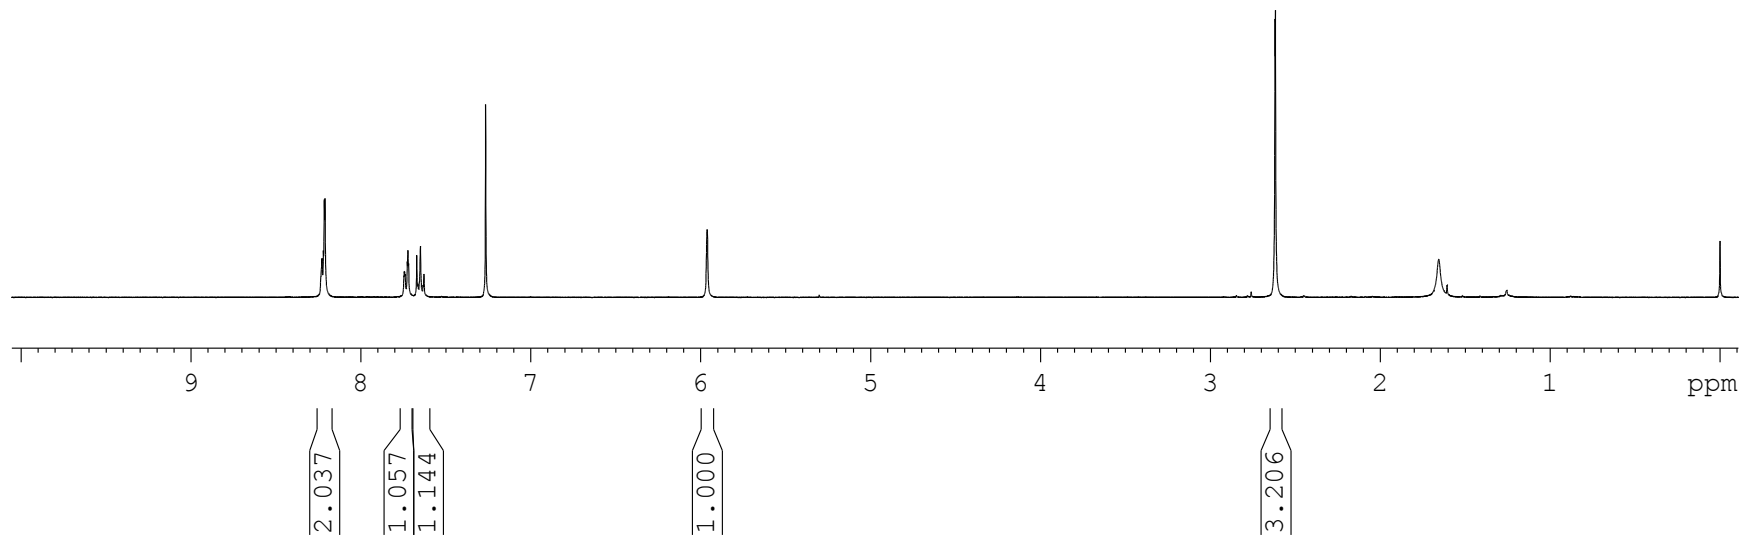

8.234  
 8.229  
 8.227  
 8.220  
 8.214  
 8.210  
 7.746  
 7.743  
 7.741  
 7.738  
 7.726  
 7.722  
 7.718  
 7.670  
 7.663  
 7.655  
 7.648  
 7.633  
 7.628  
 7.265  
 — 5.961

2.618  
 2.616

— 0.001



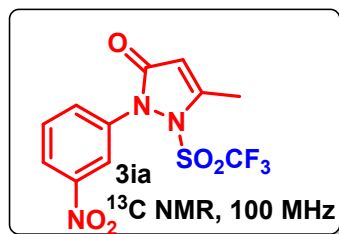

— 166.858

— 158.499

— 148.605

— 138.949

— 130.099

— 130.004

— 124.982

— 122.646

— 121.694

— 119.063

— 118.406

— 115.113

— 109.946

— 77.472

— 77.155

— 76.837

— 15.840

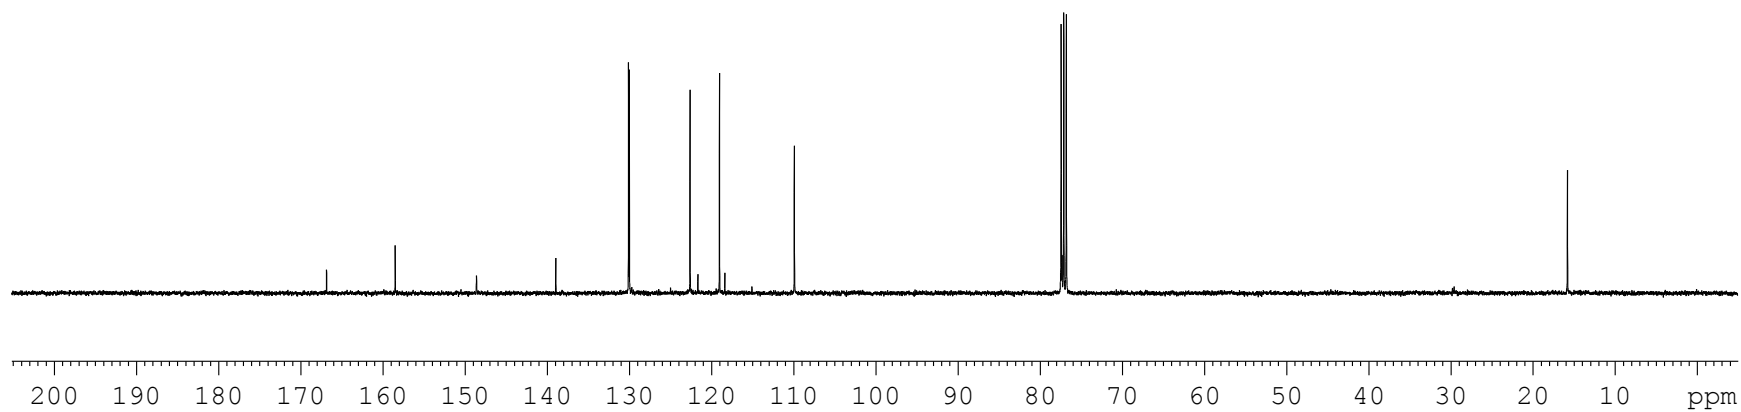

— -67.732

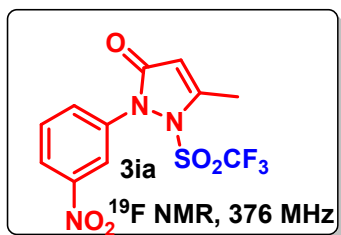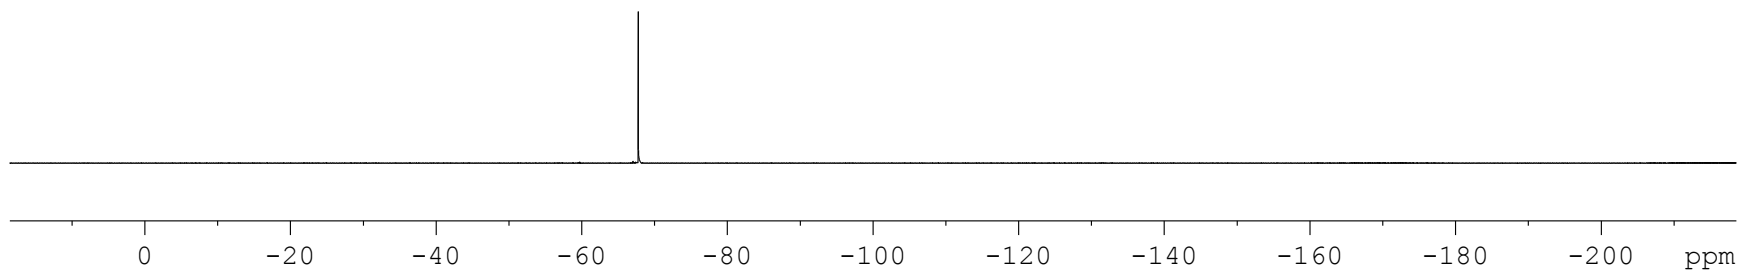

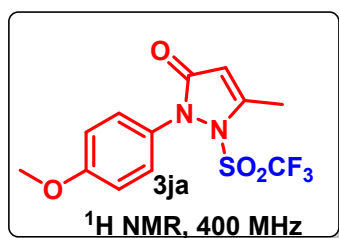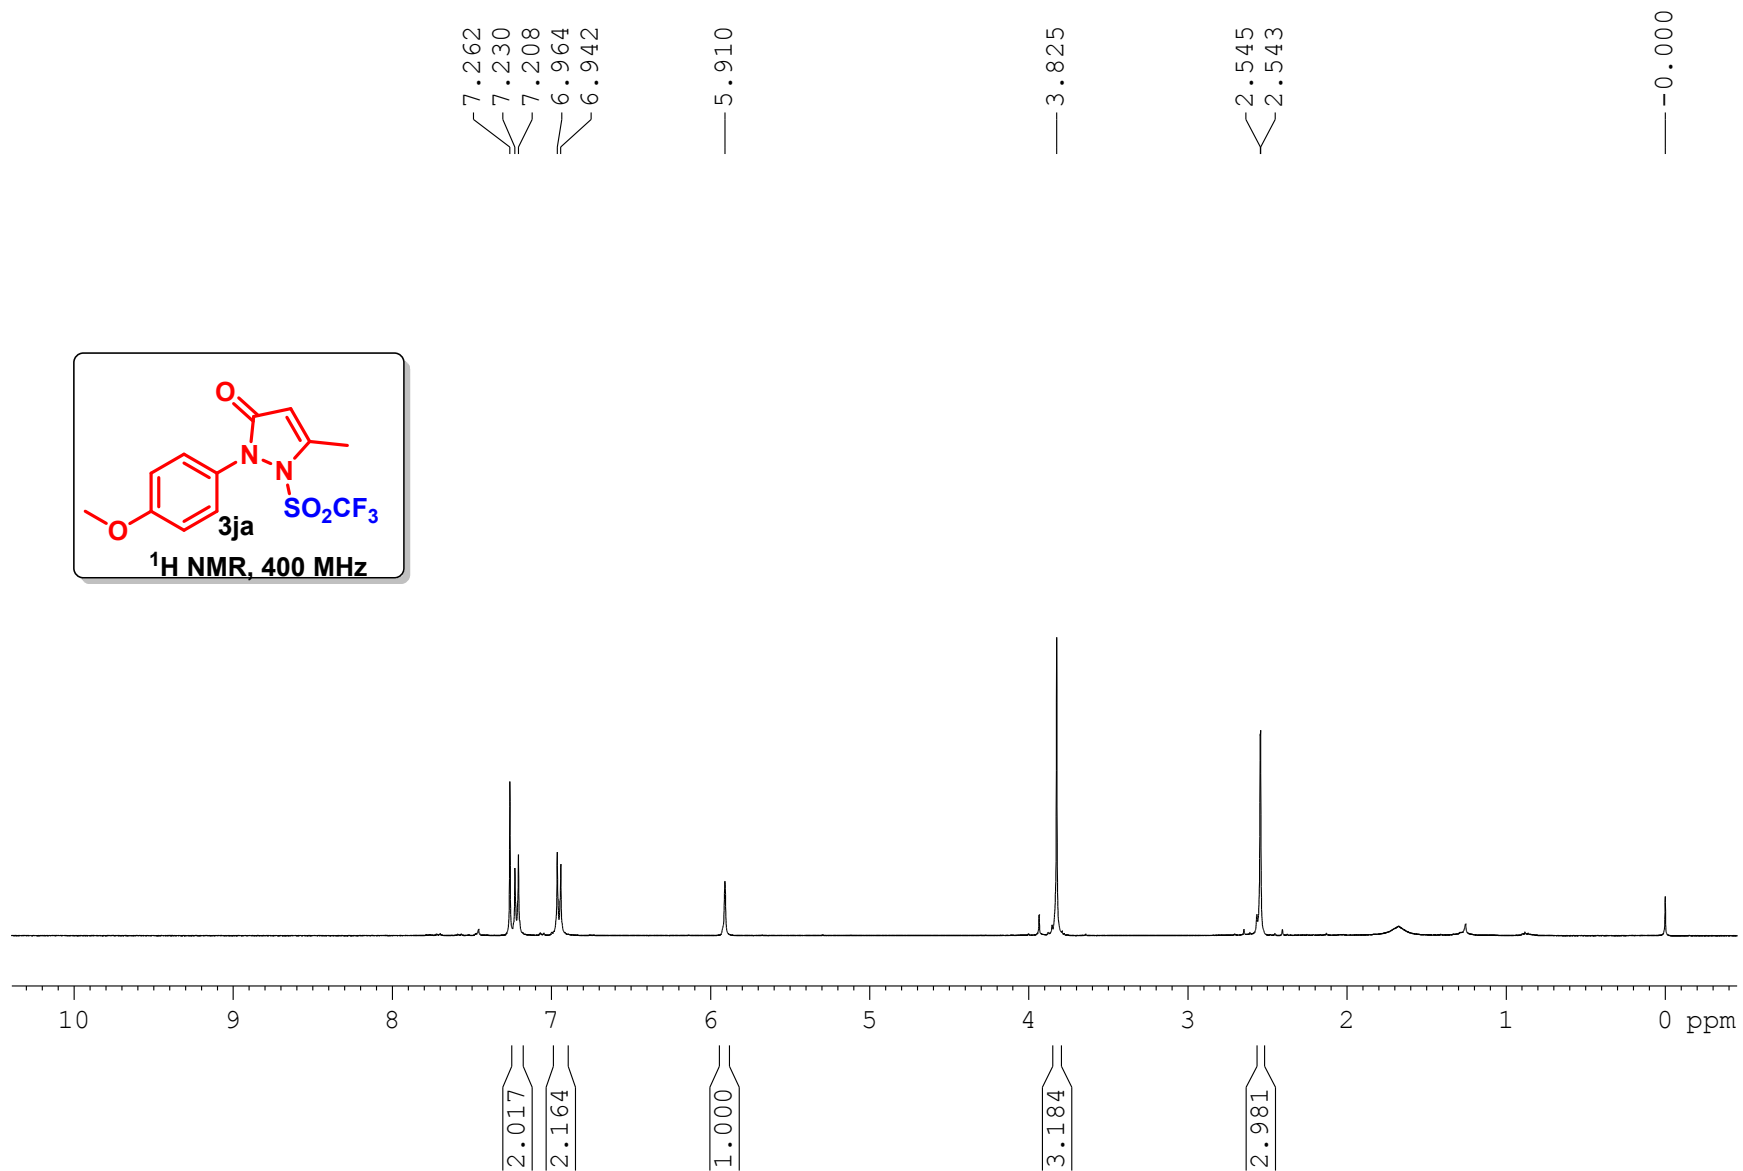

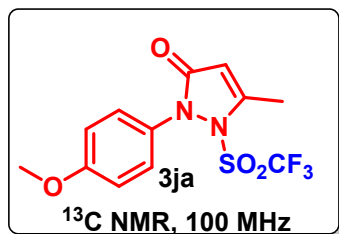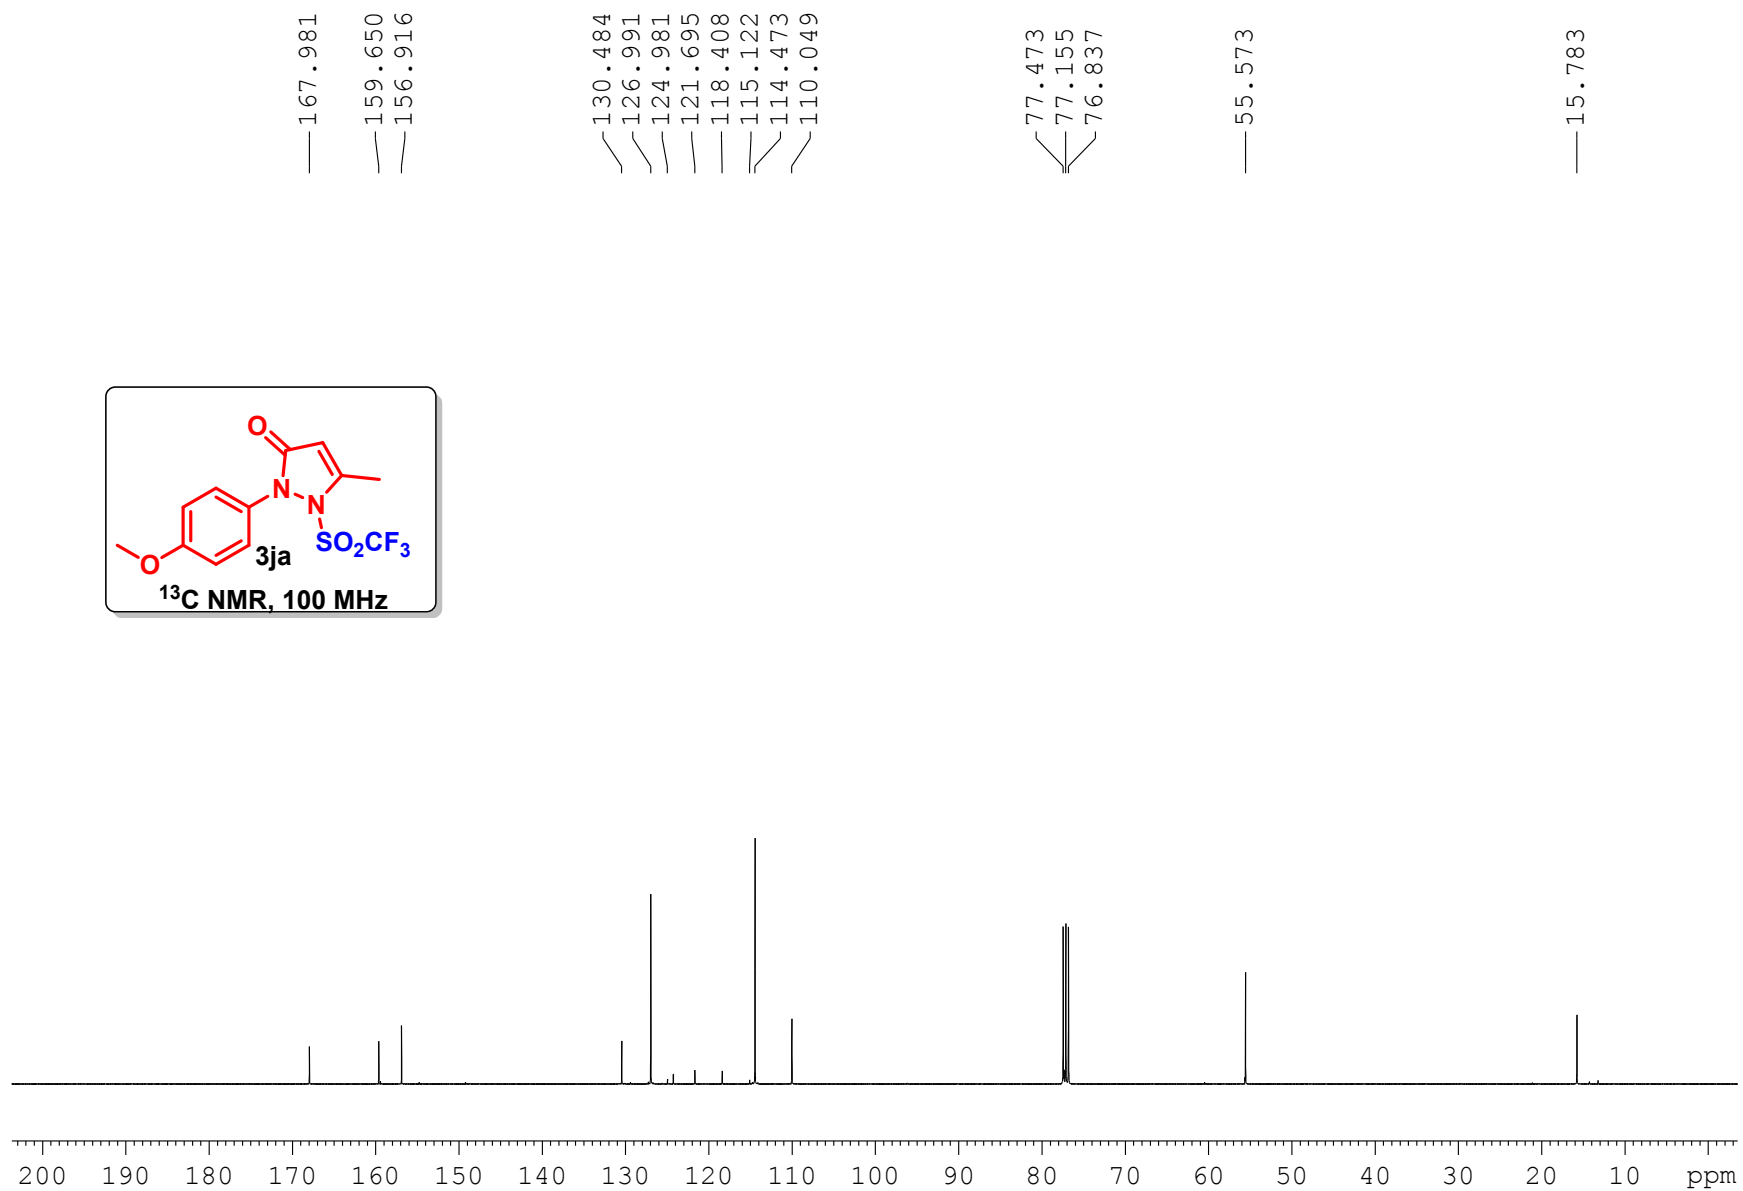

— -68.352

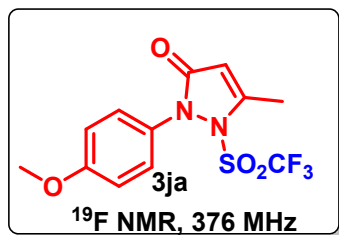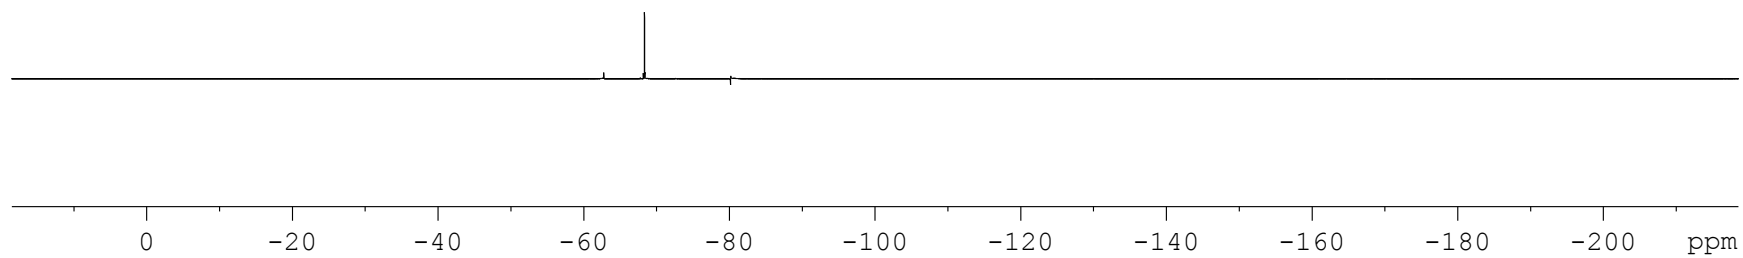

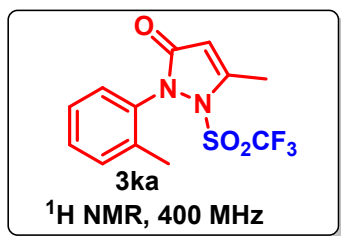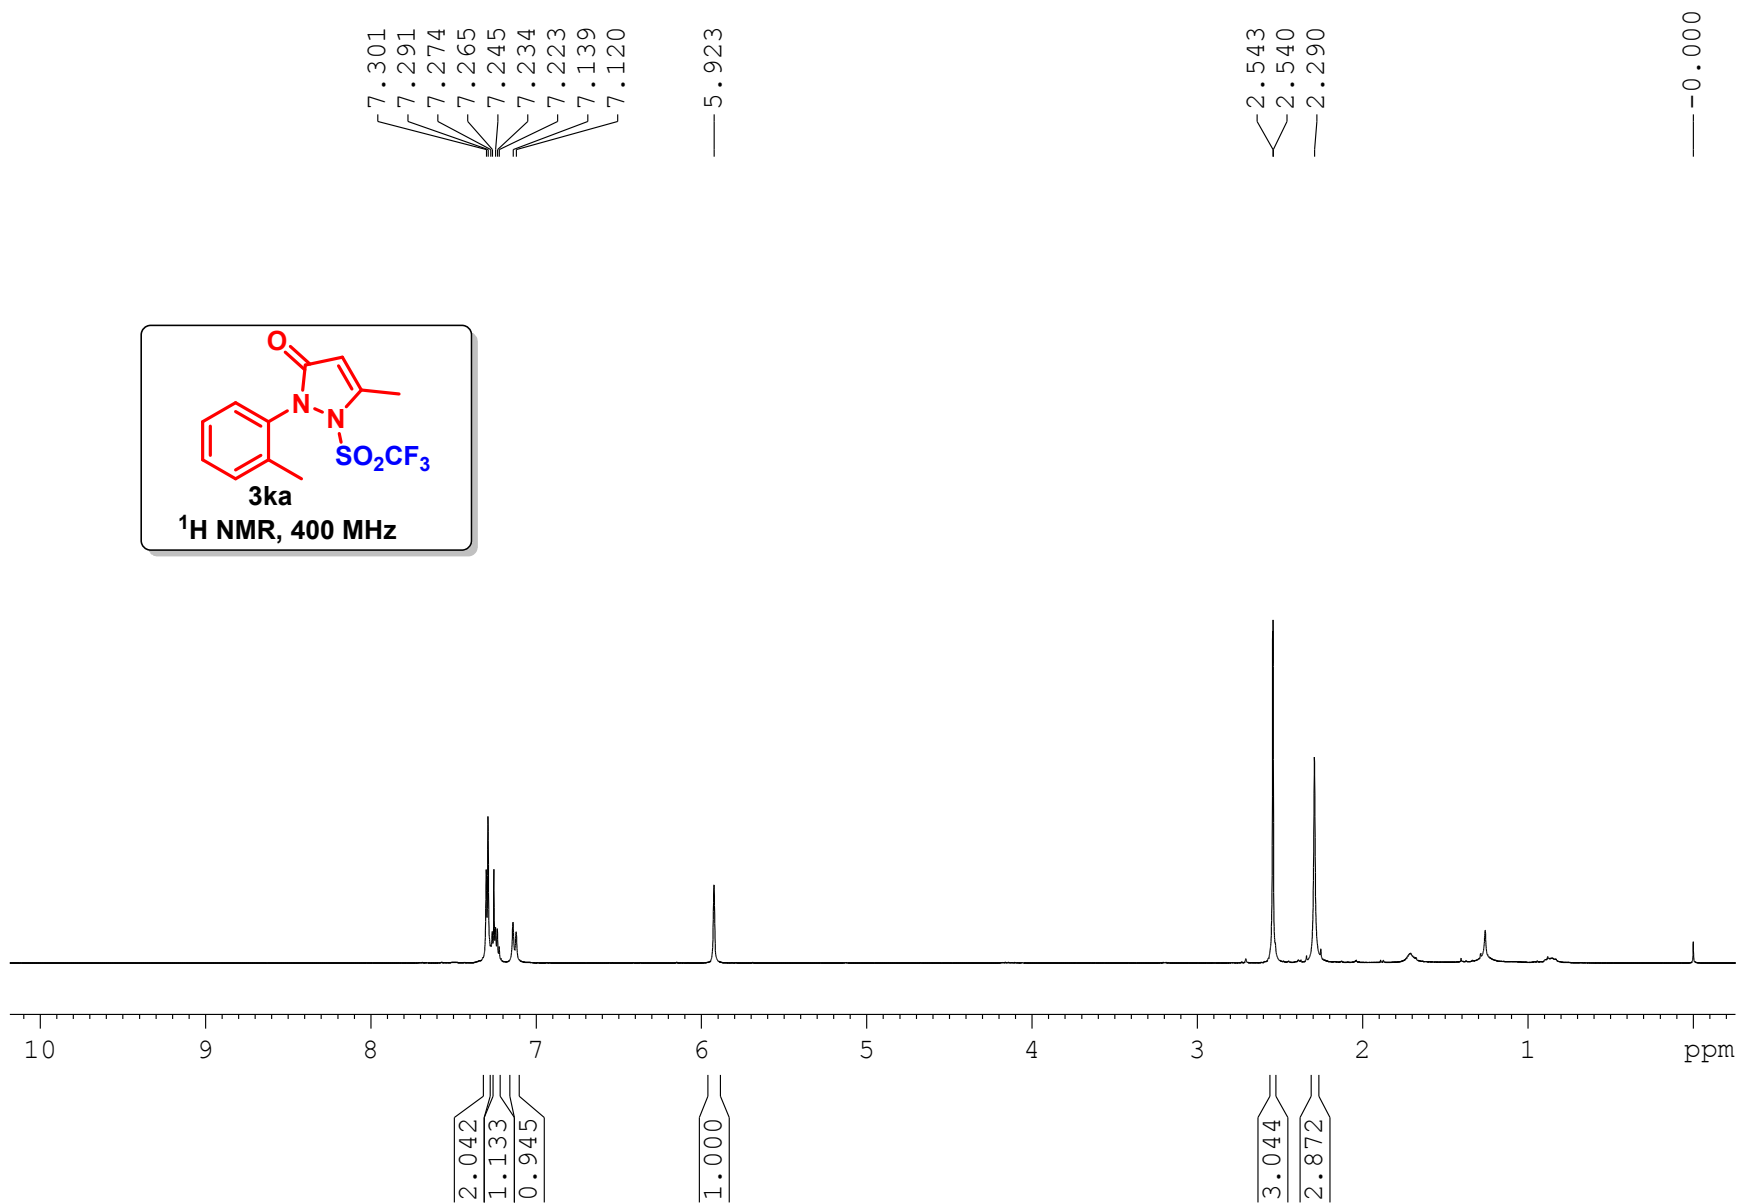

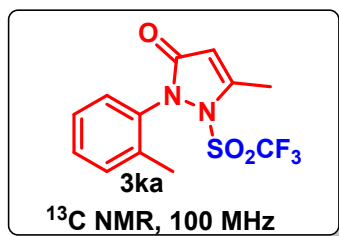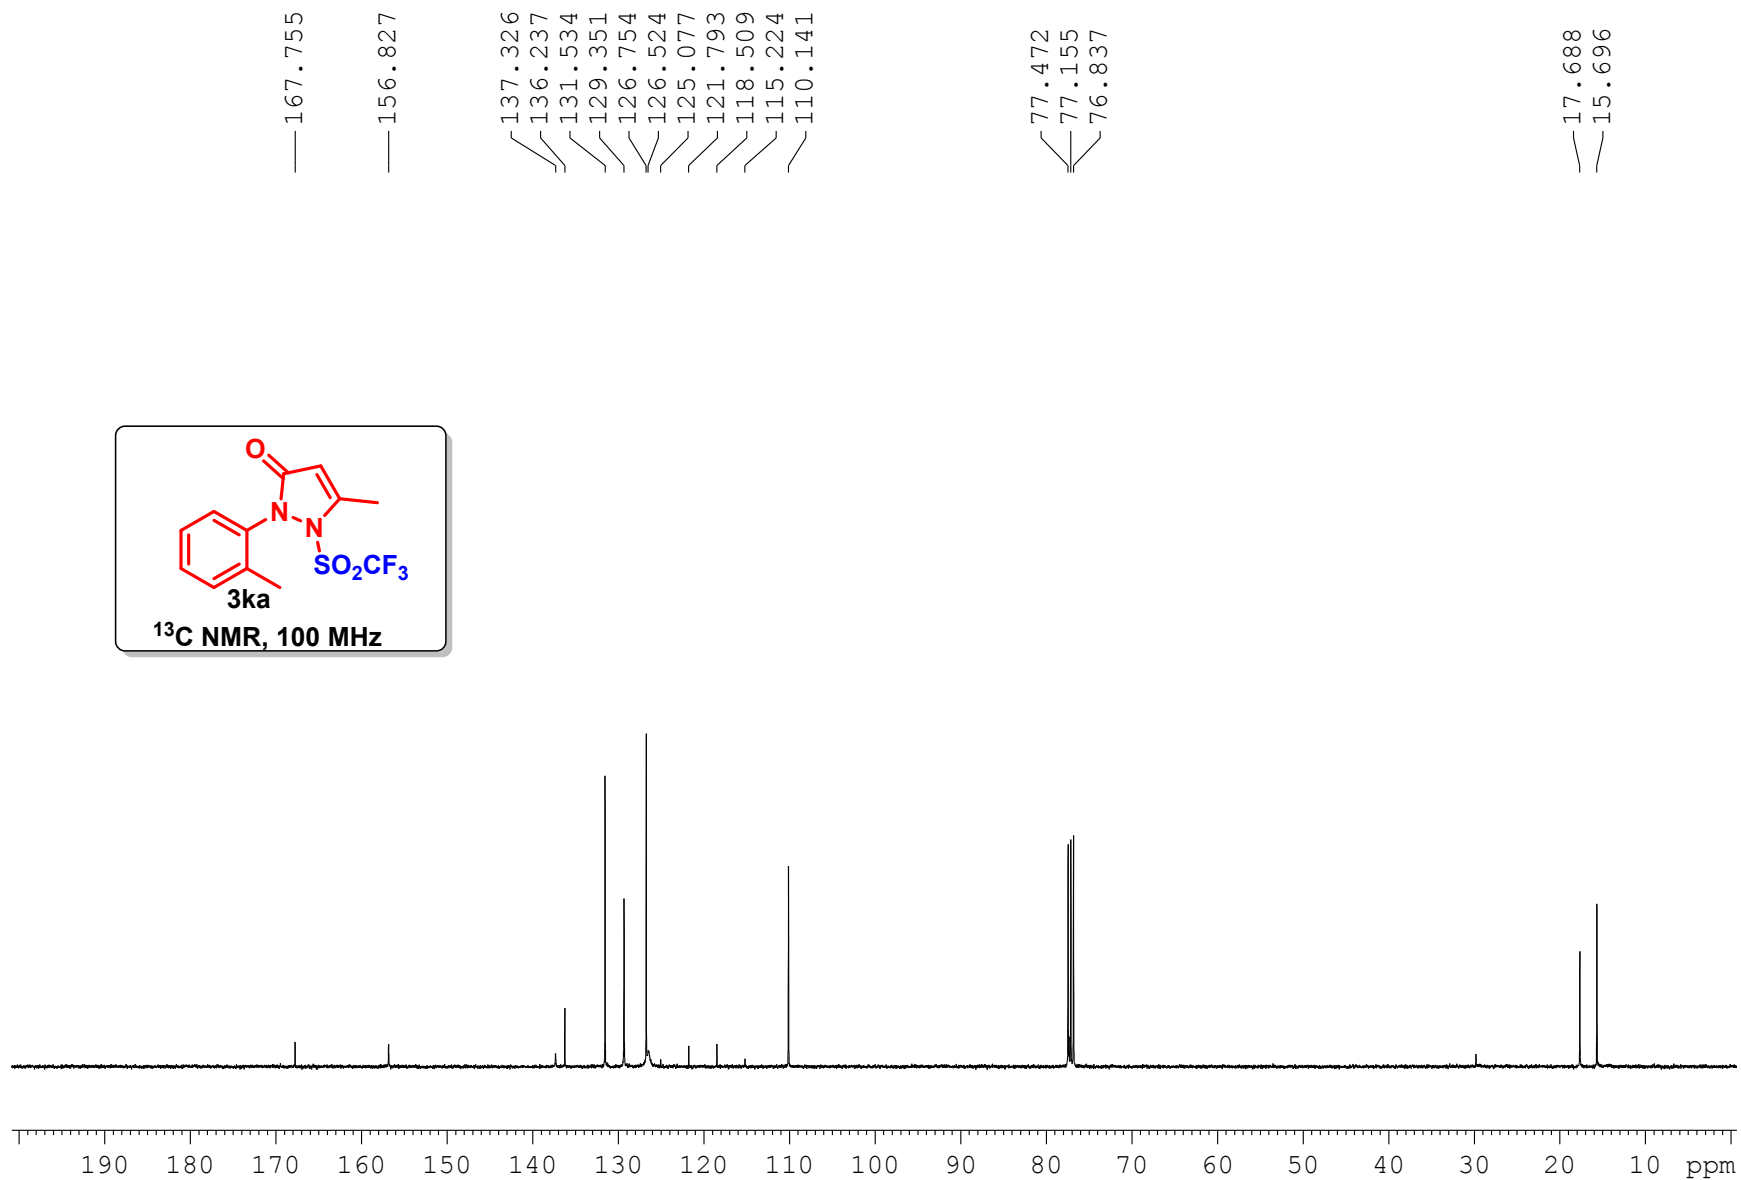

— -68.262

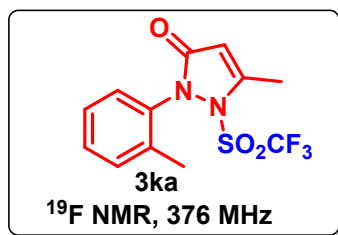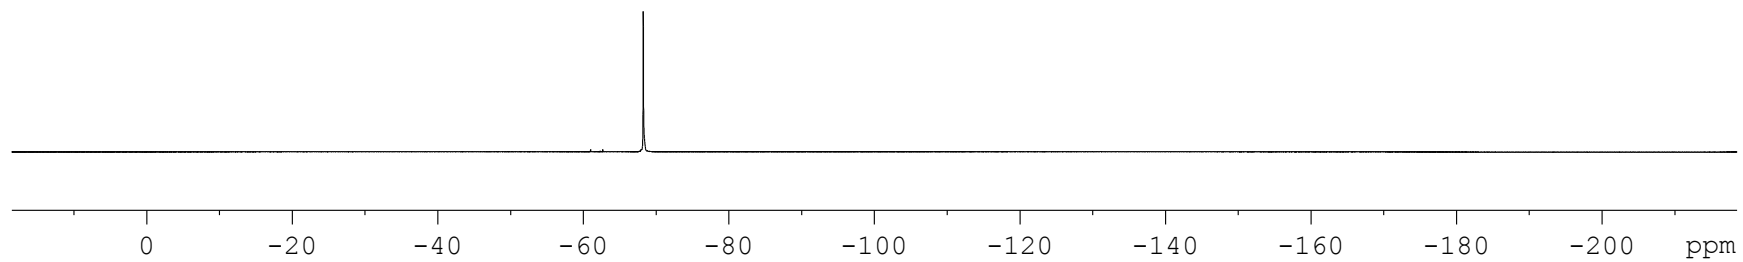



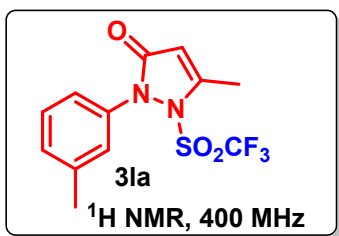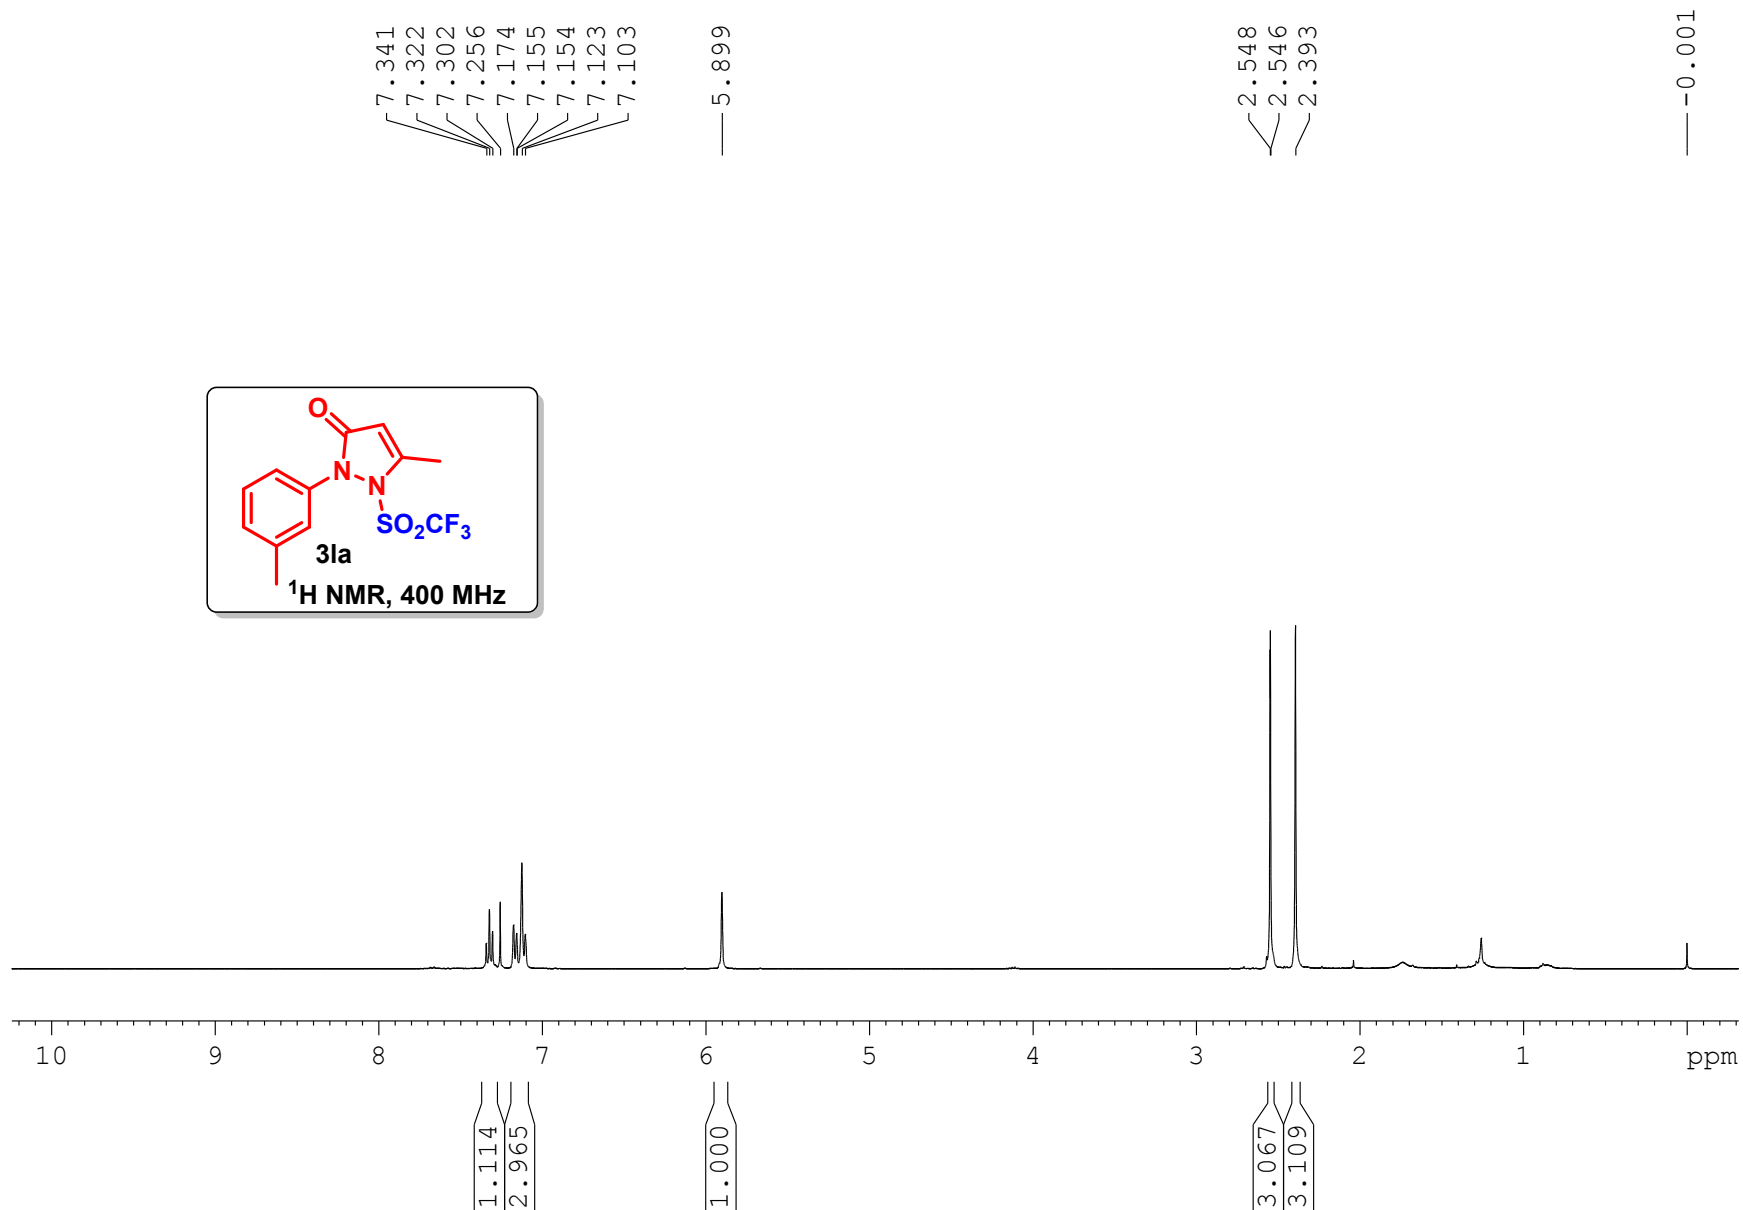

— 167.687

— 157.152

139.270

137.851

129.243

128.927

125.523

125.042

121.968

121.755

118.467

115.179

110.187

77.474

77.157

76.839

— 21.504

— 15.768

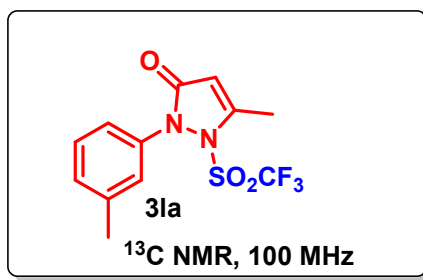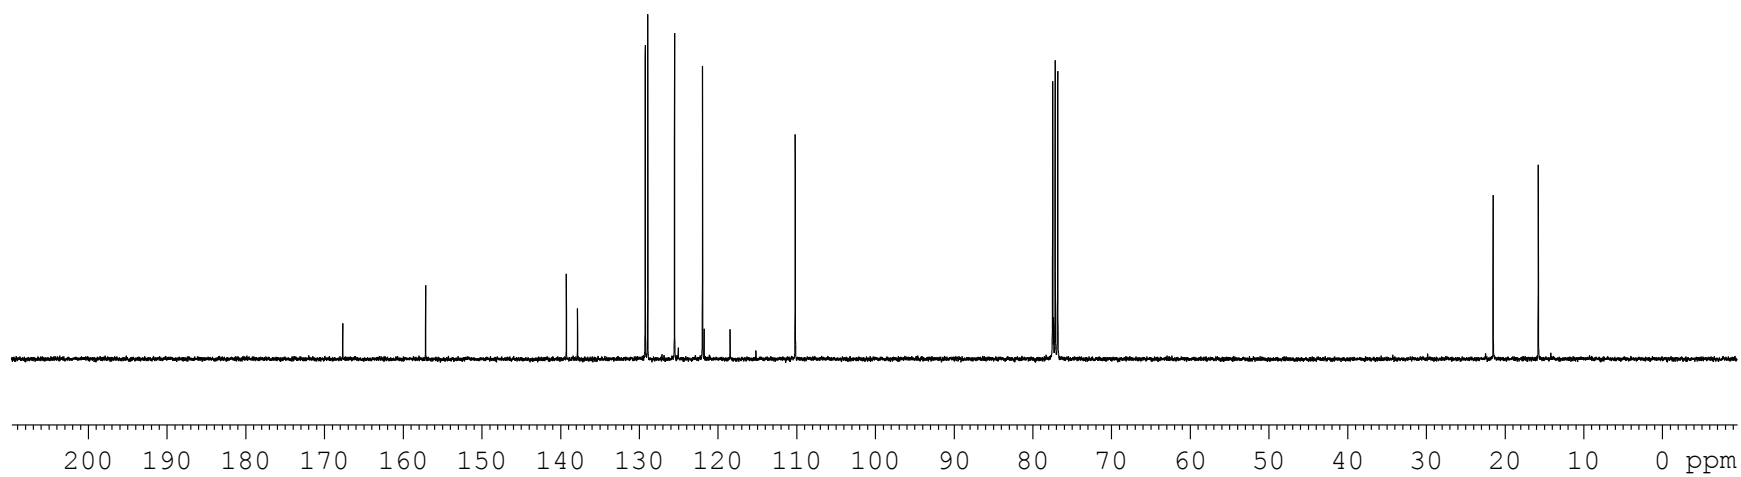

---68.162

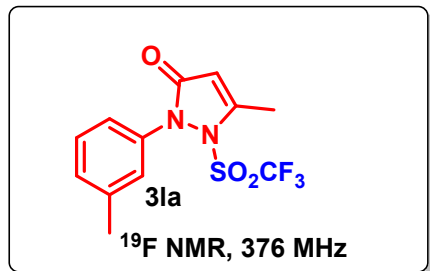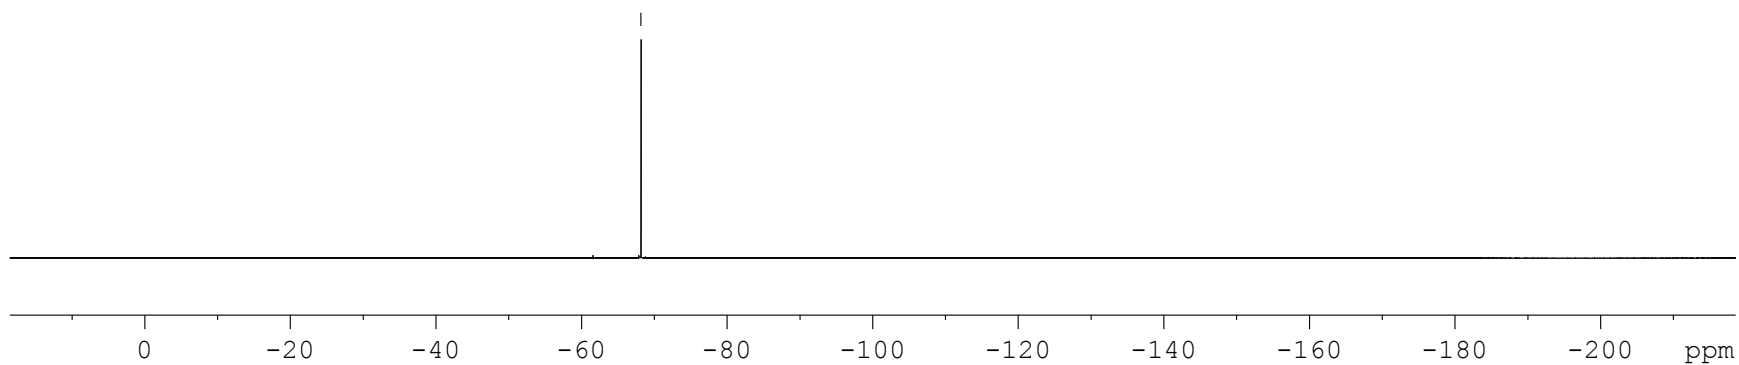

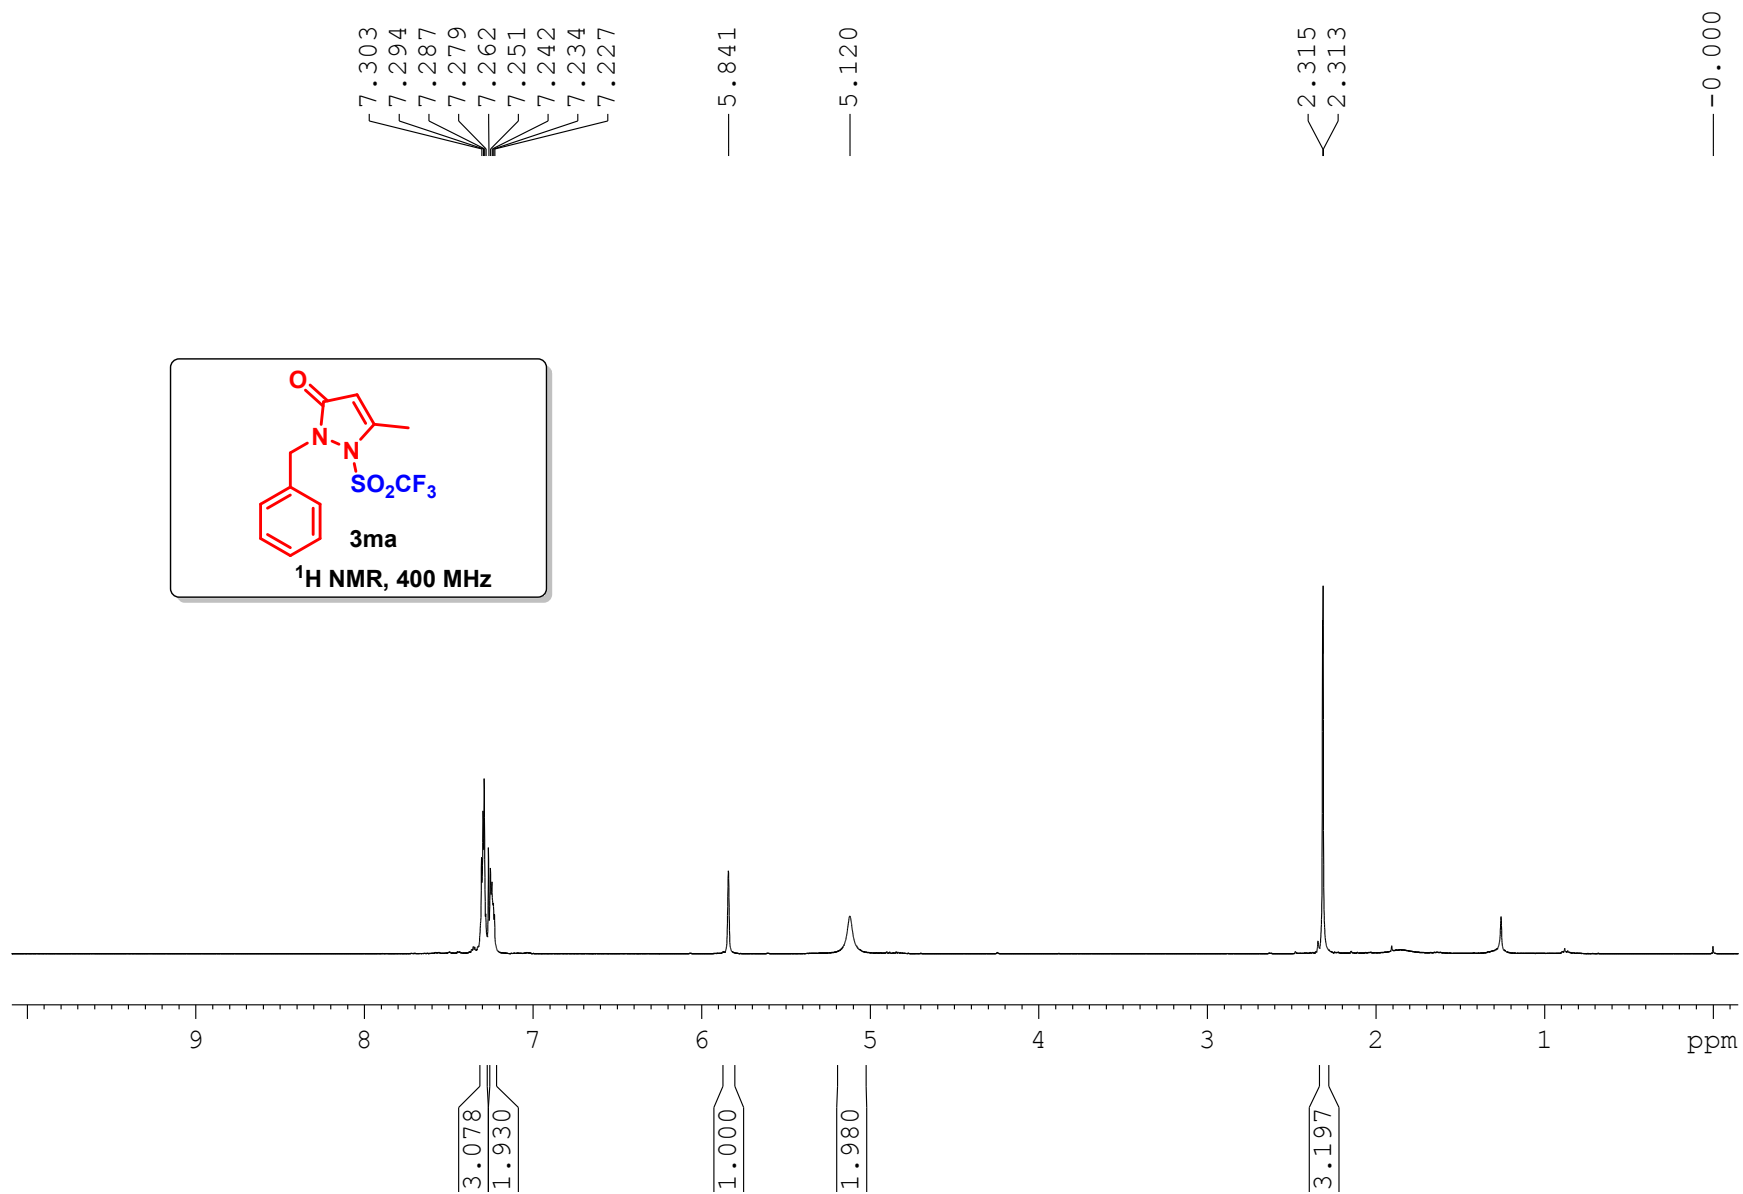

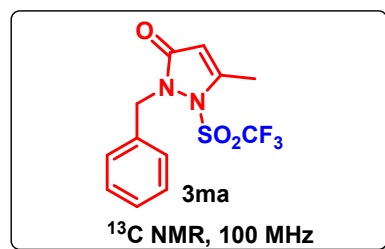

—169.827

—157.582

134.317  
 128.958  
 128.786  
 128.540  
 124.974  
 121.689  
 118.405  
 115.119  
 111.137

77.475  
 77.157  
 76.840

—51.893

—15.592

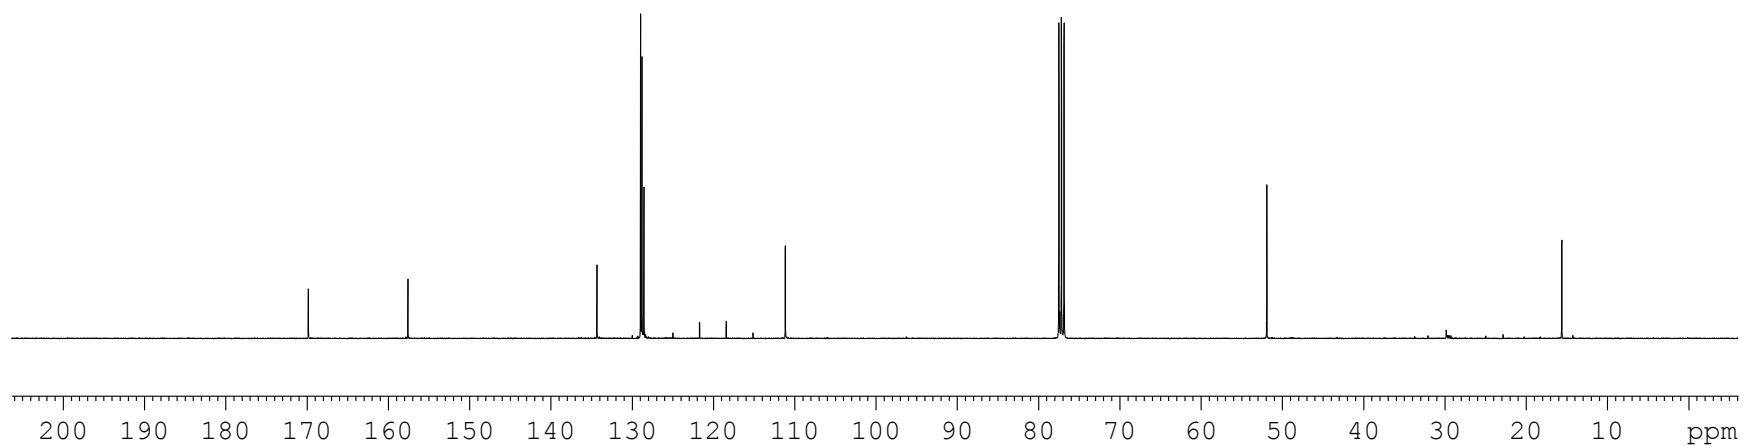

— -68.462

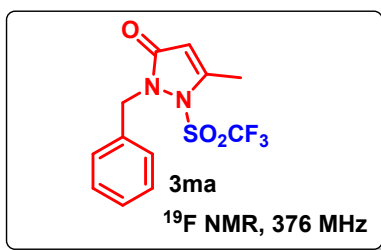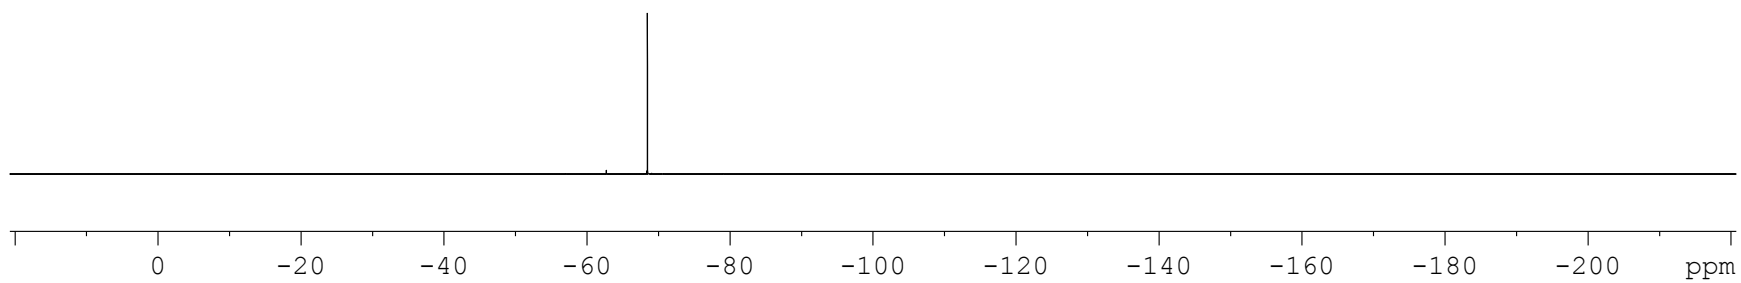

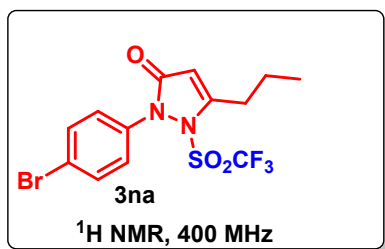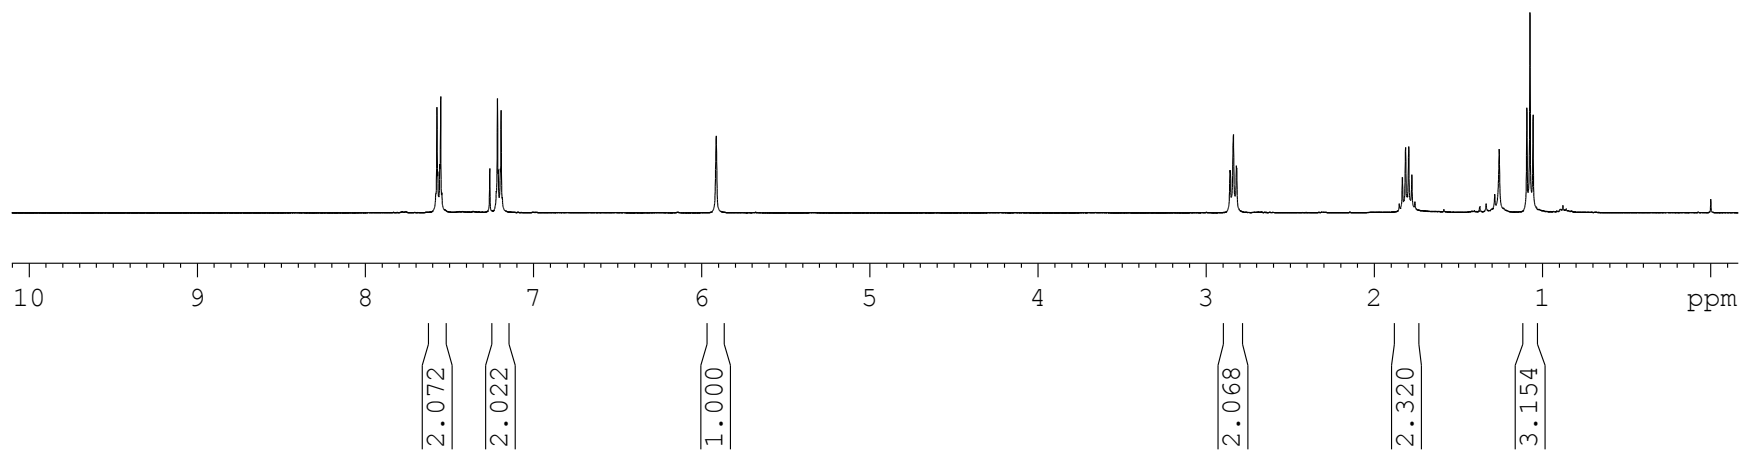

7.574  
 7.552  
 7.260  
 7.215  
 7.193

— 5.913

2.860  
 2.857  
 2.839  
 2.822  
 2.819  
 1.852  
 1.834  
 1.815  
 1.796  
 1.778  
 1.759  
 1.094  
 1.075  
 1.057

— 0.000

— 167.364  
— 162.352

— 137.012  
— 132.345  
— 125.902  
— 123.973  
— 121.853  
— 121.338  
— 118.704  
— 116.070  
— 109.200

77.410  
77.157  
76.902

— 31.107

— 21.324

— 13.651

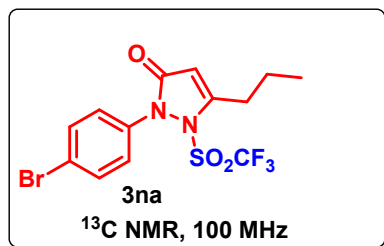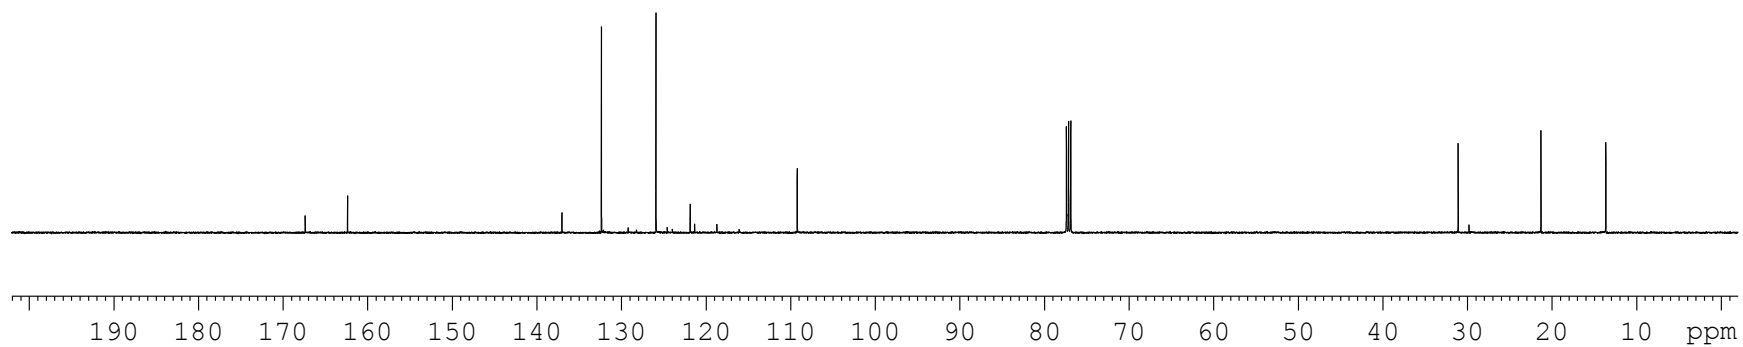



— -67.735

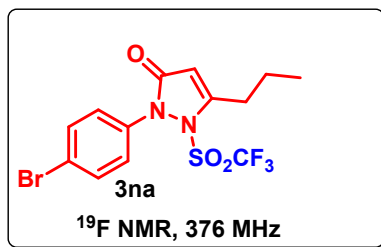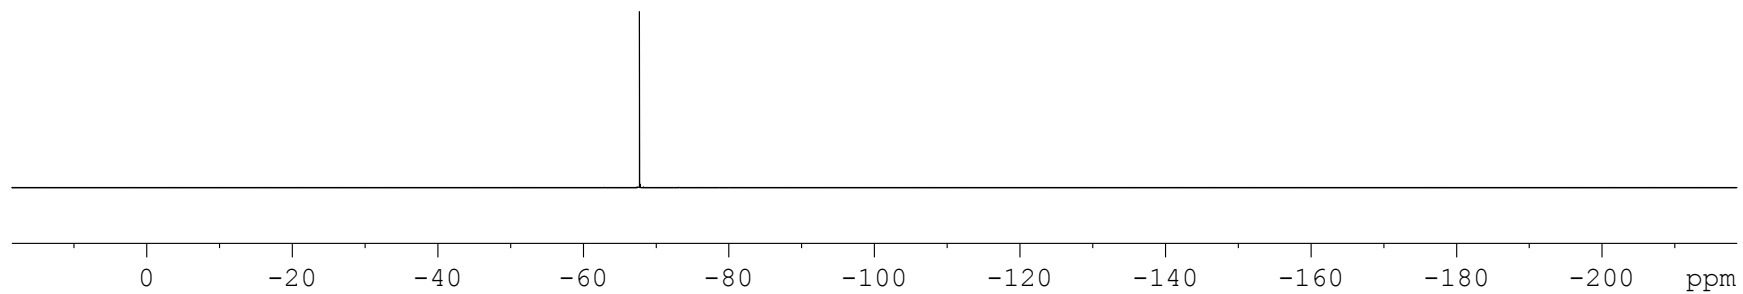

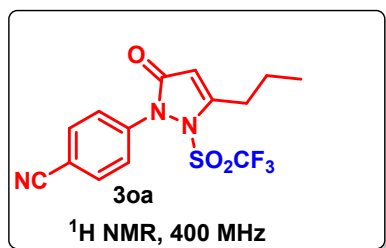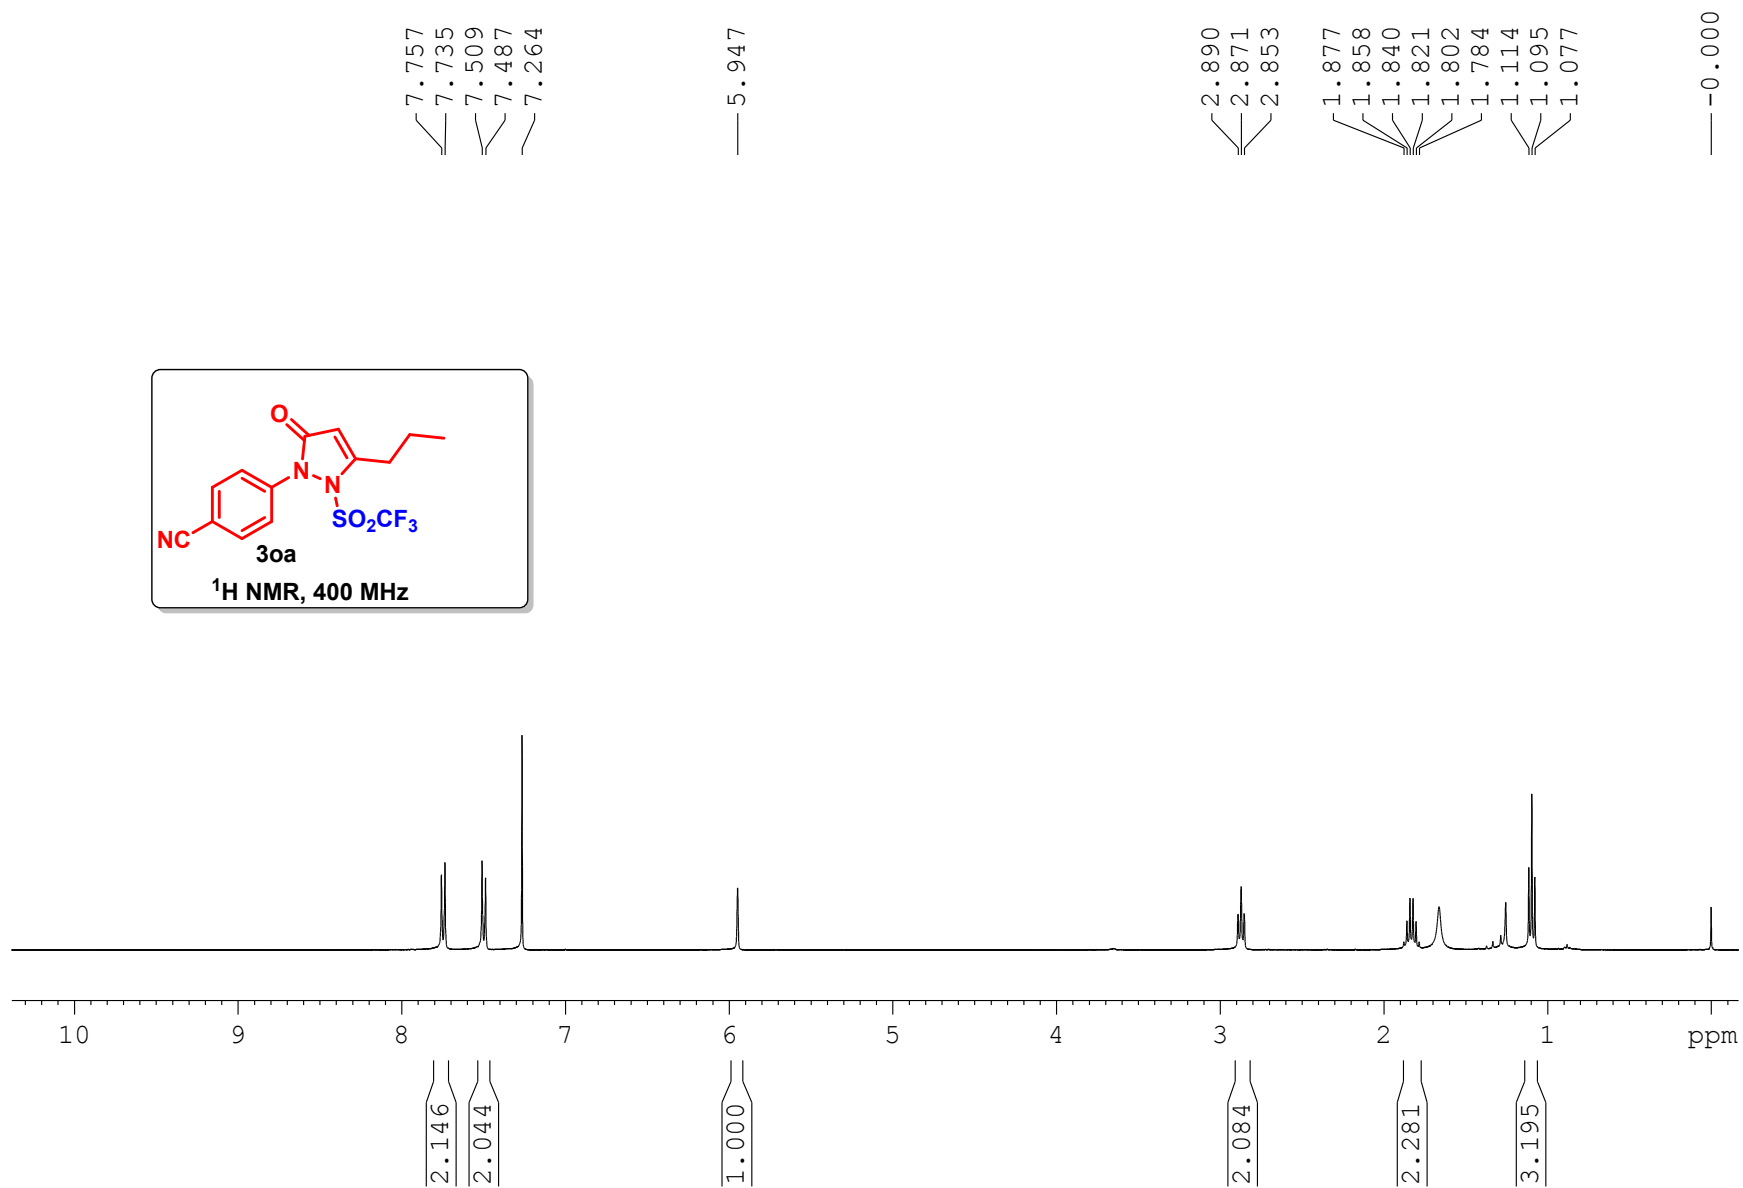

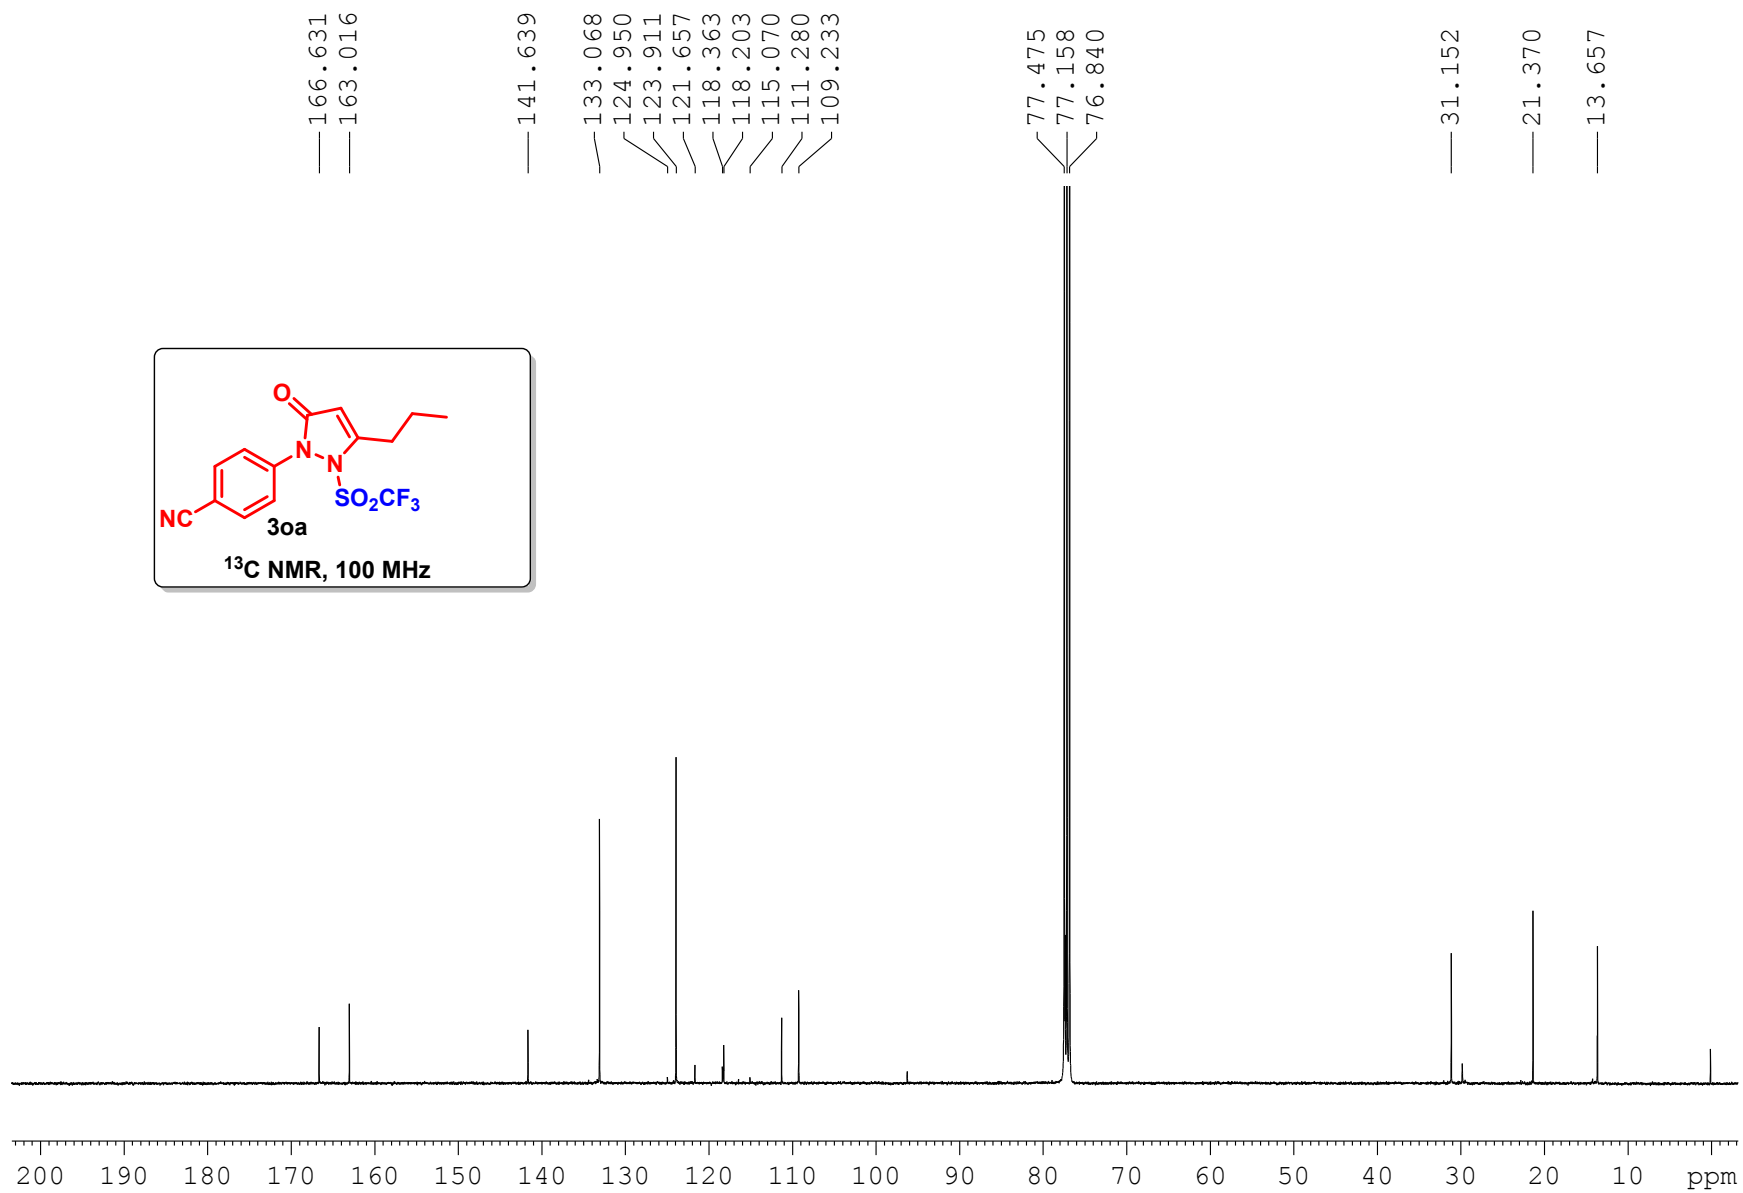

— -67.420

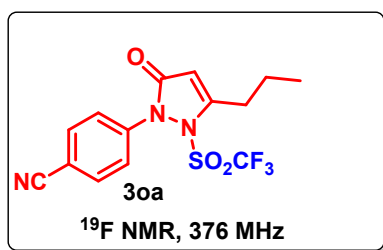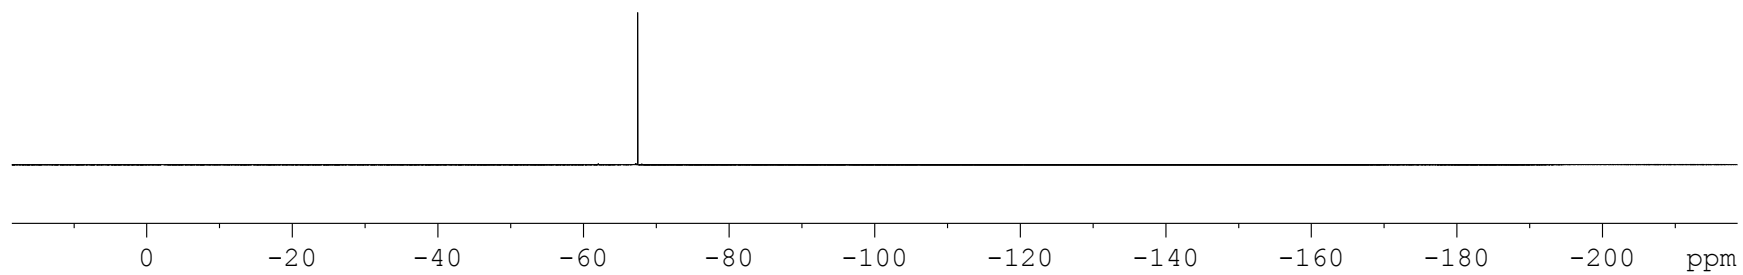

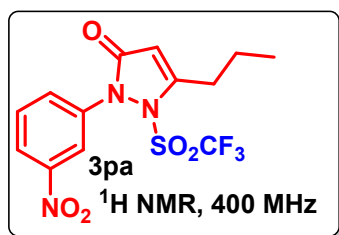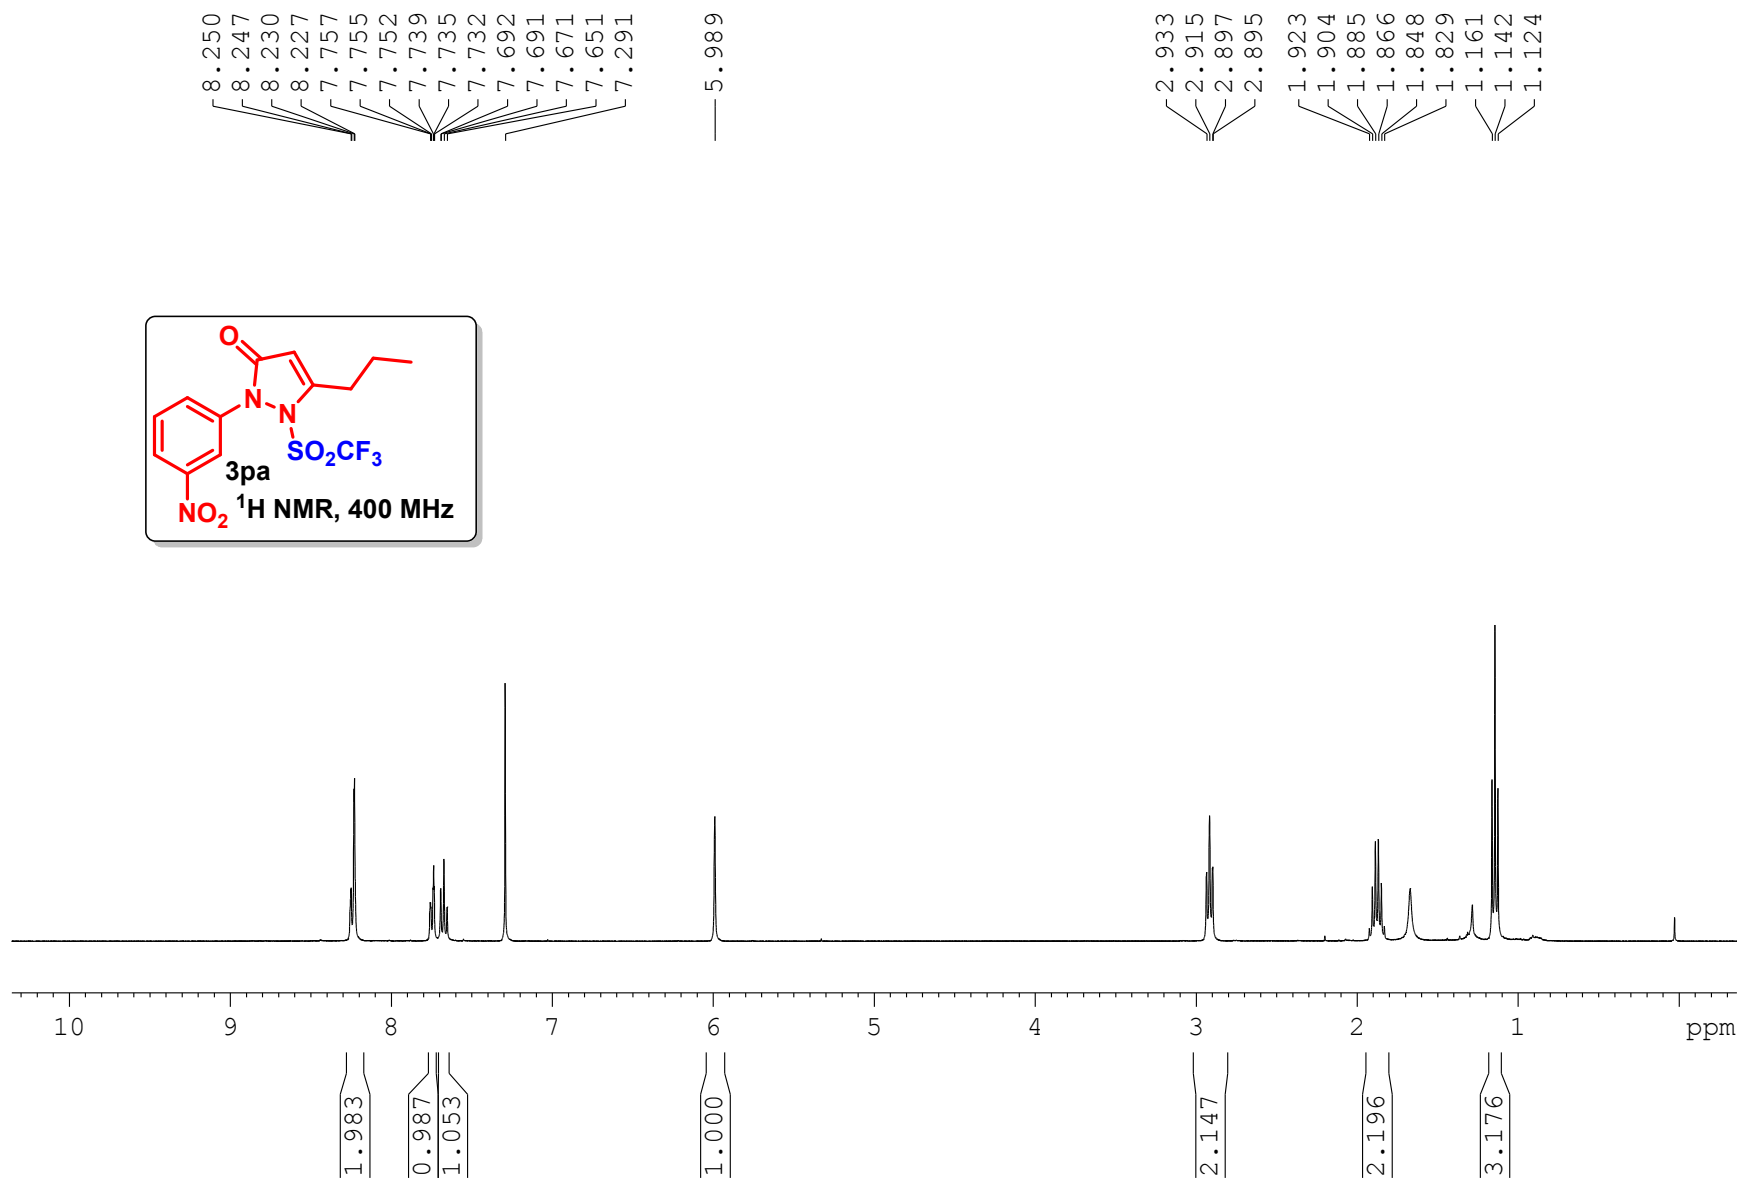

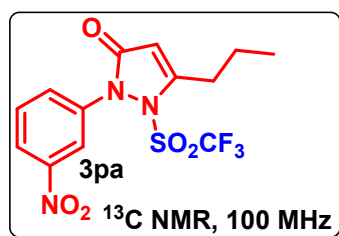

— 167.003  
— 163.189

— 148.551

— 138.995  
— 129.998  
— 129.864  
— 124.932  
— 122.543  
— 121.641  
— 118.891  
— 118.349  
— 115.056  
— 108.966

— 77.476  
— 77.158  
— 76.840

— 31.128

— 21.277

— 13.683

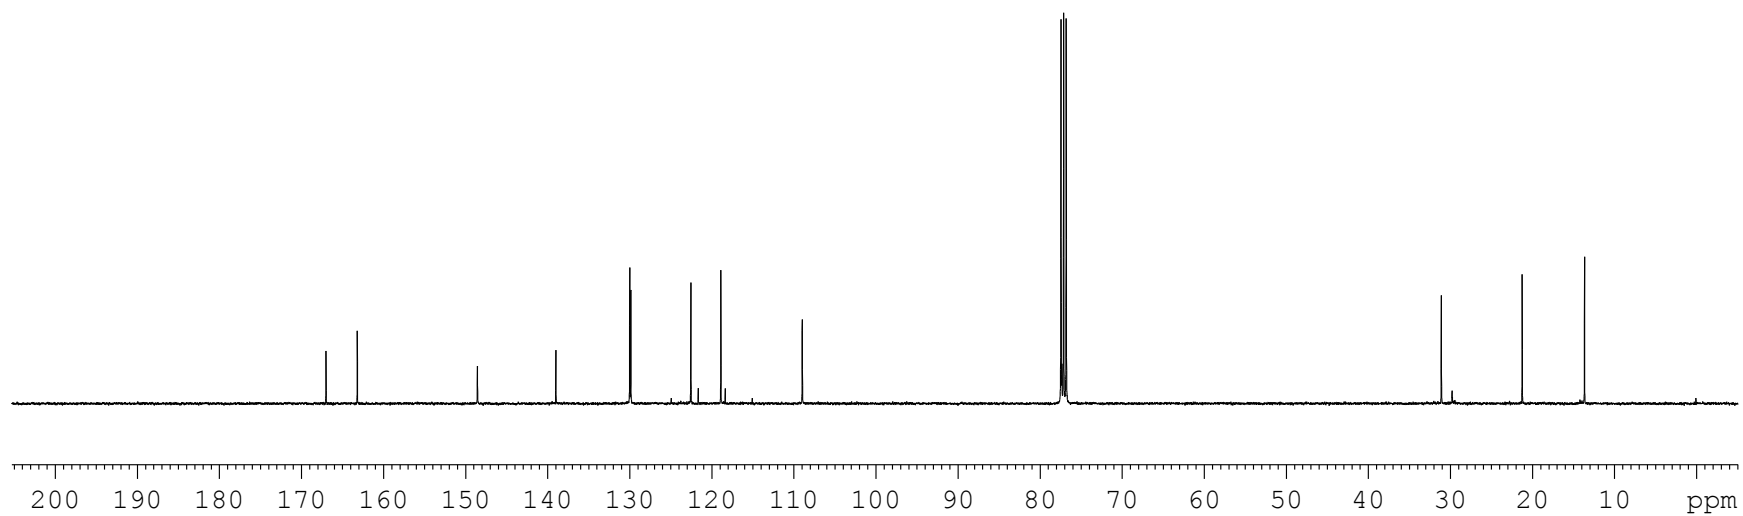

— -67.479

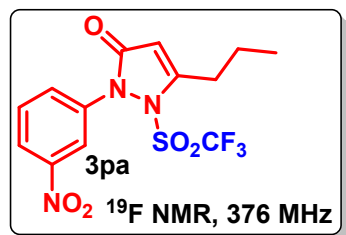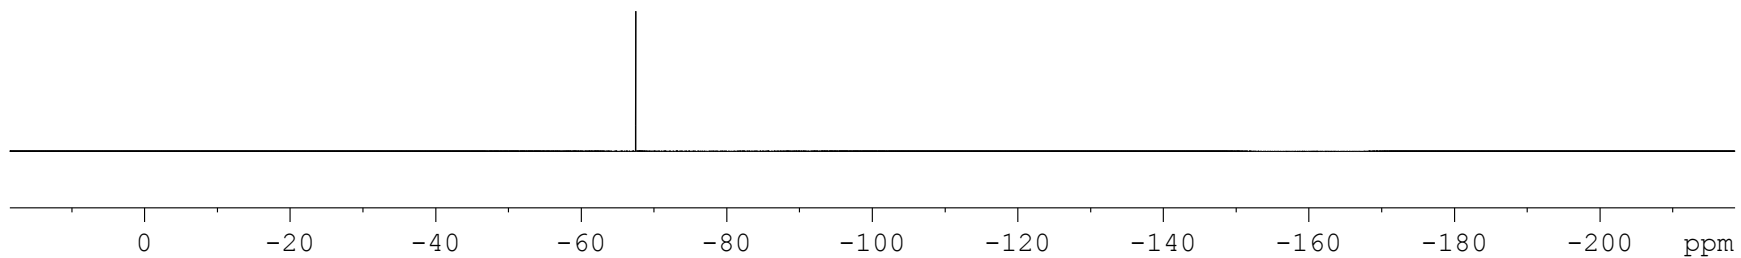

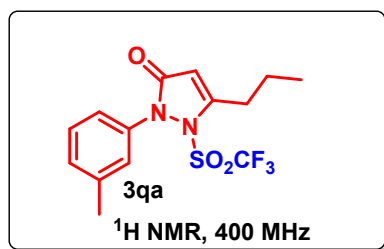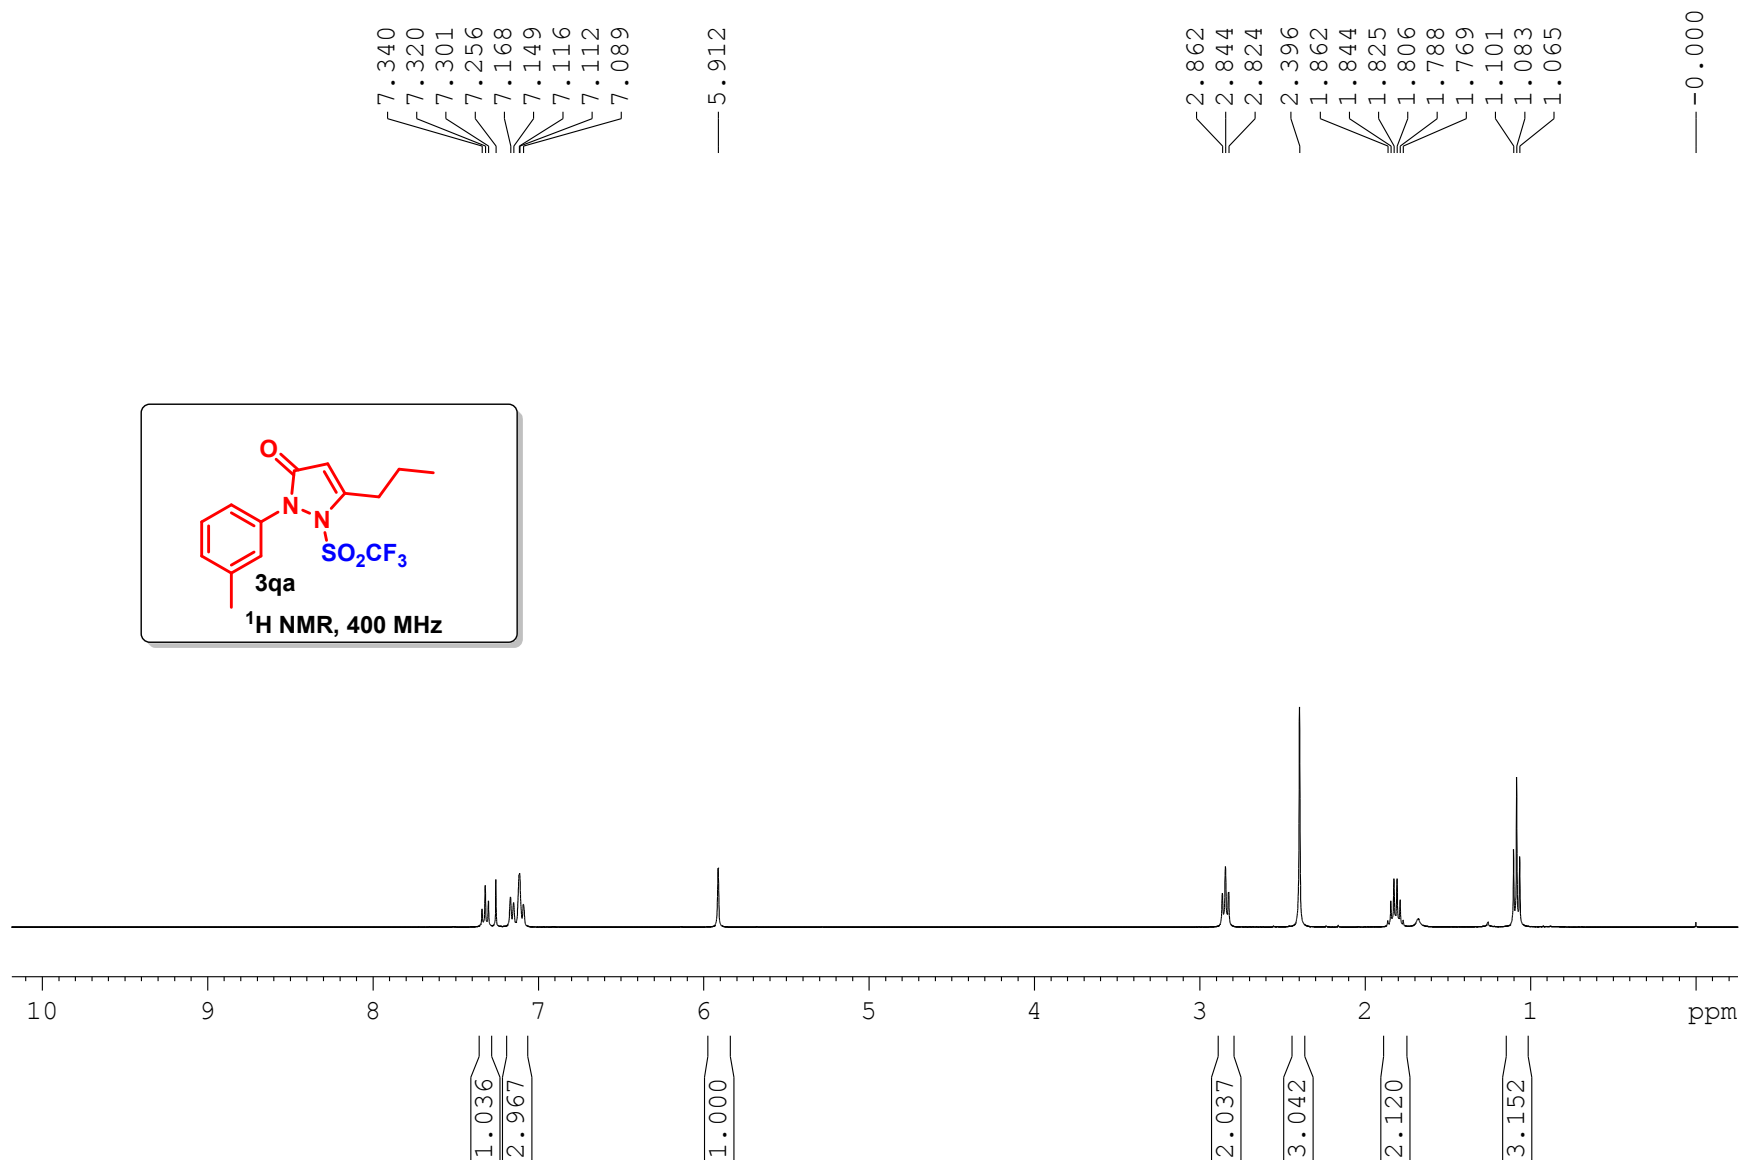



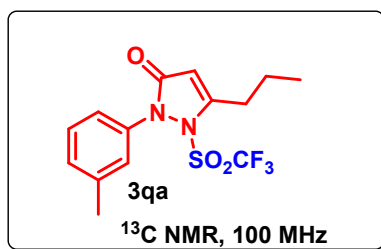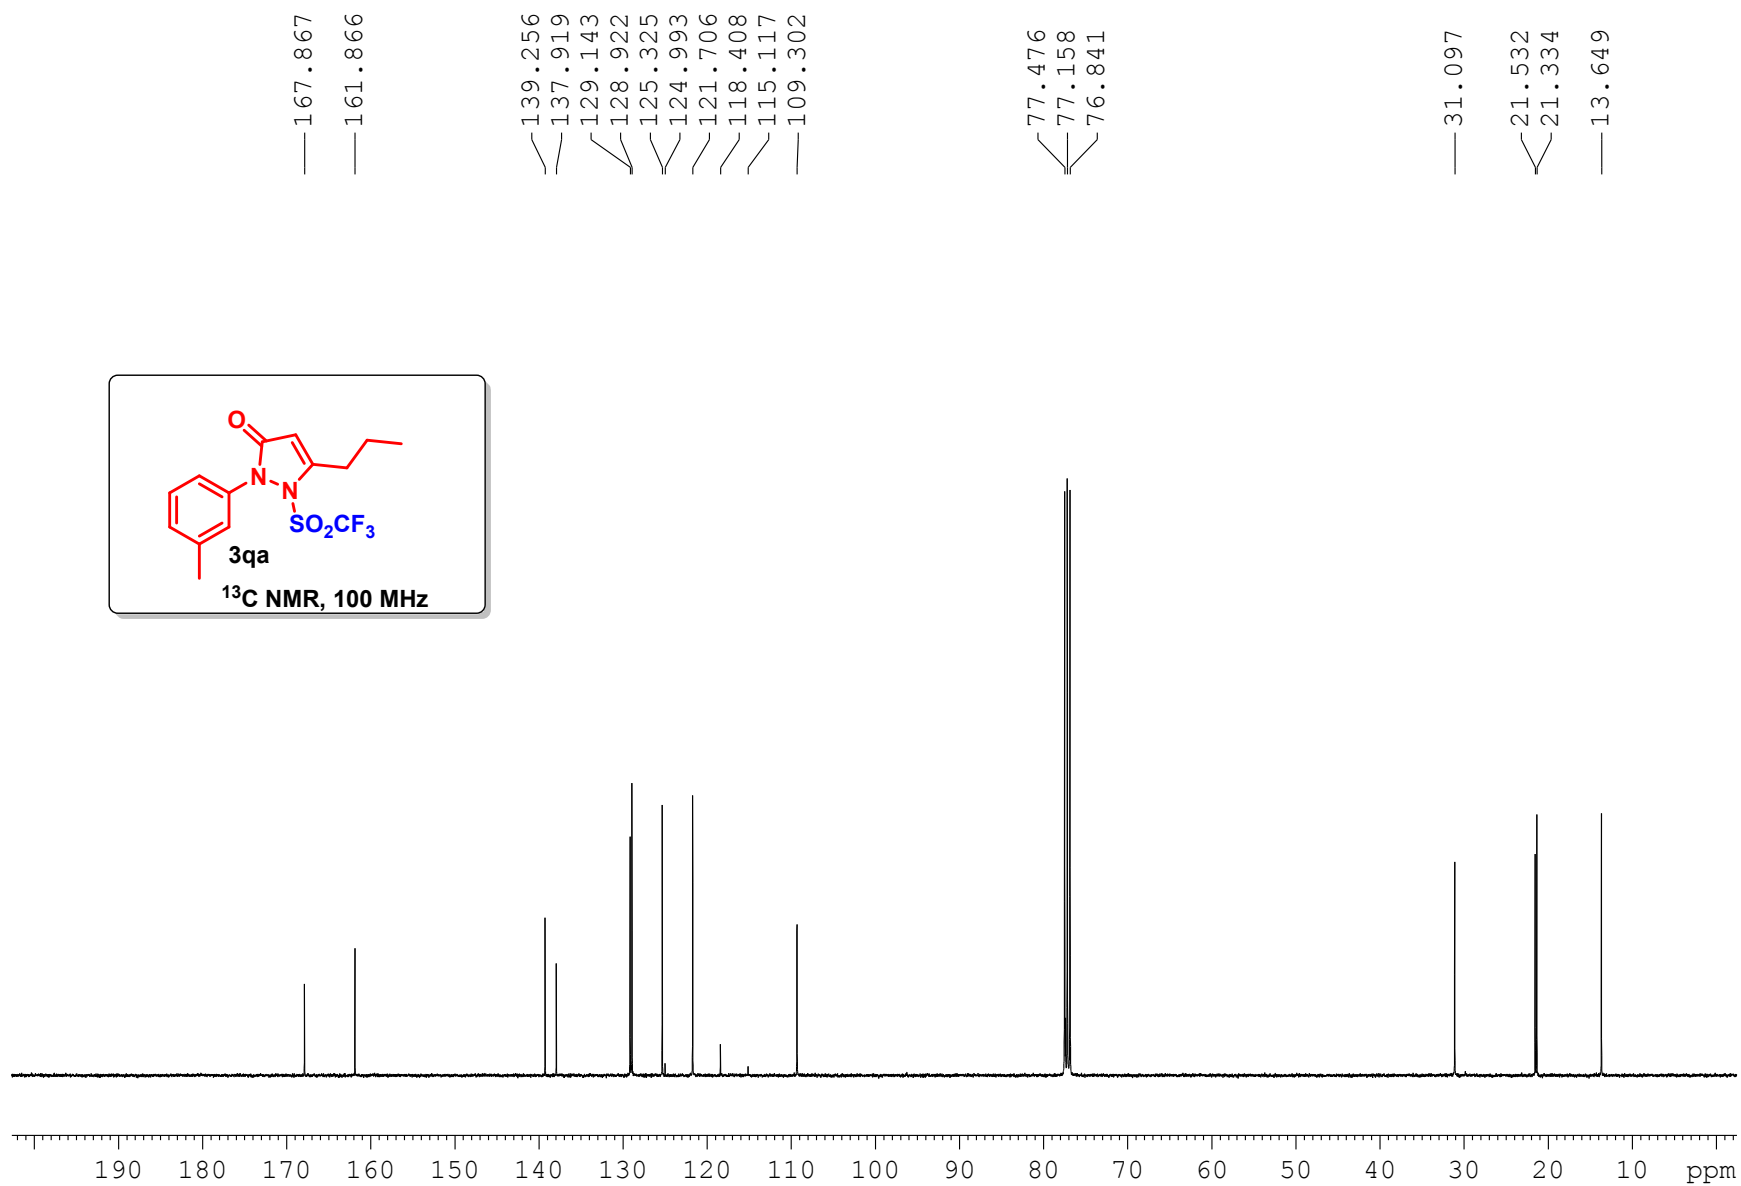

— -67.887

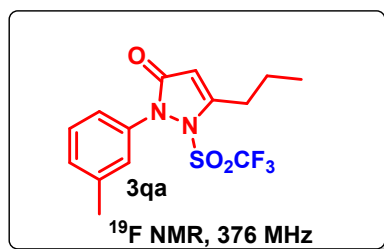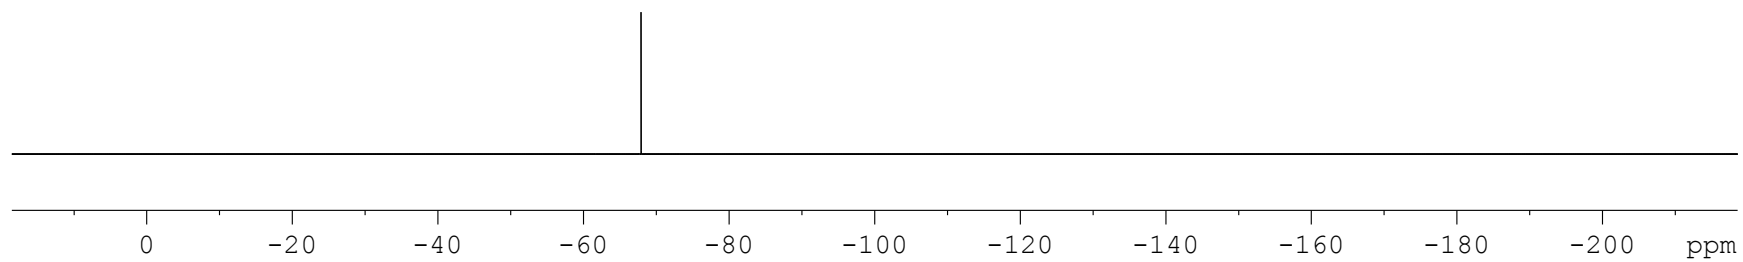

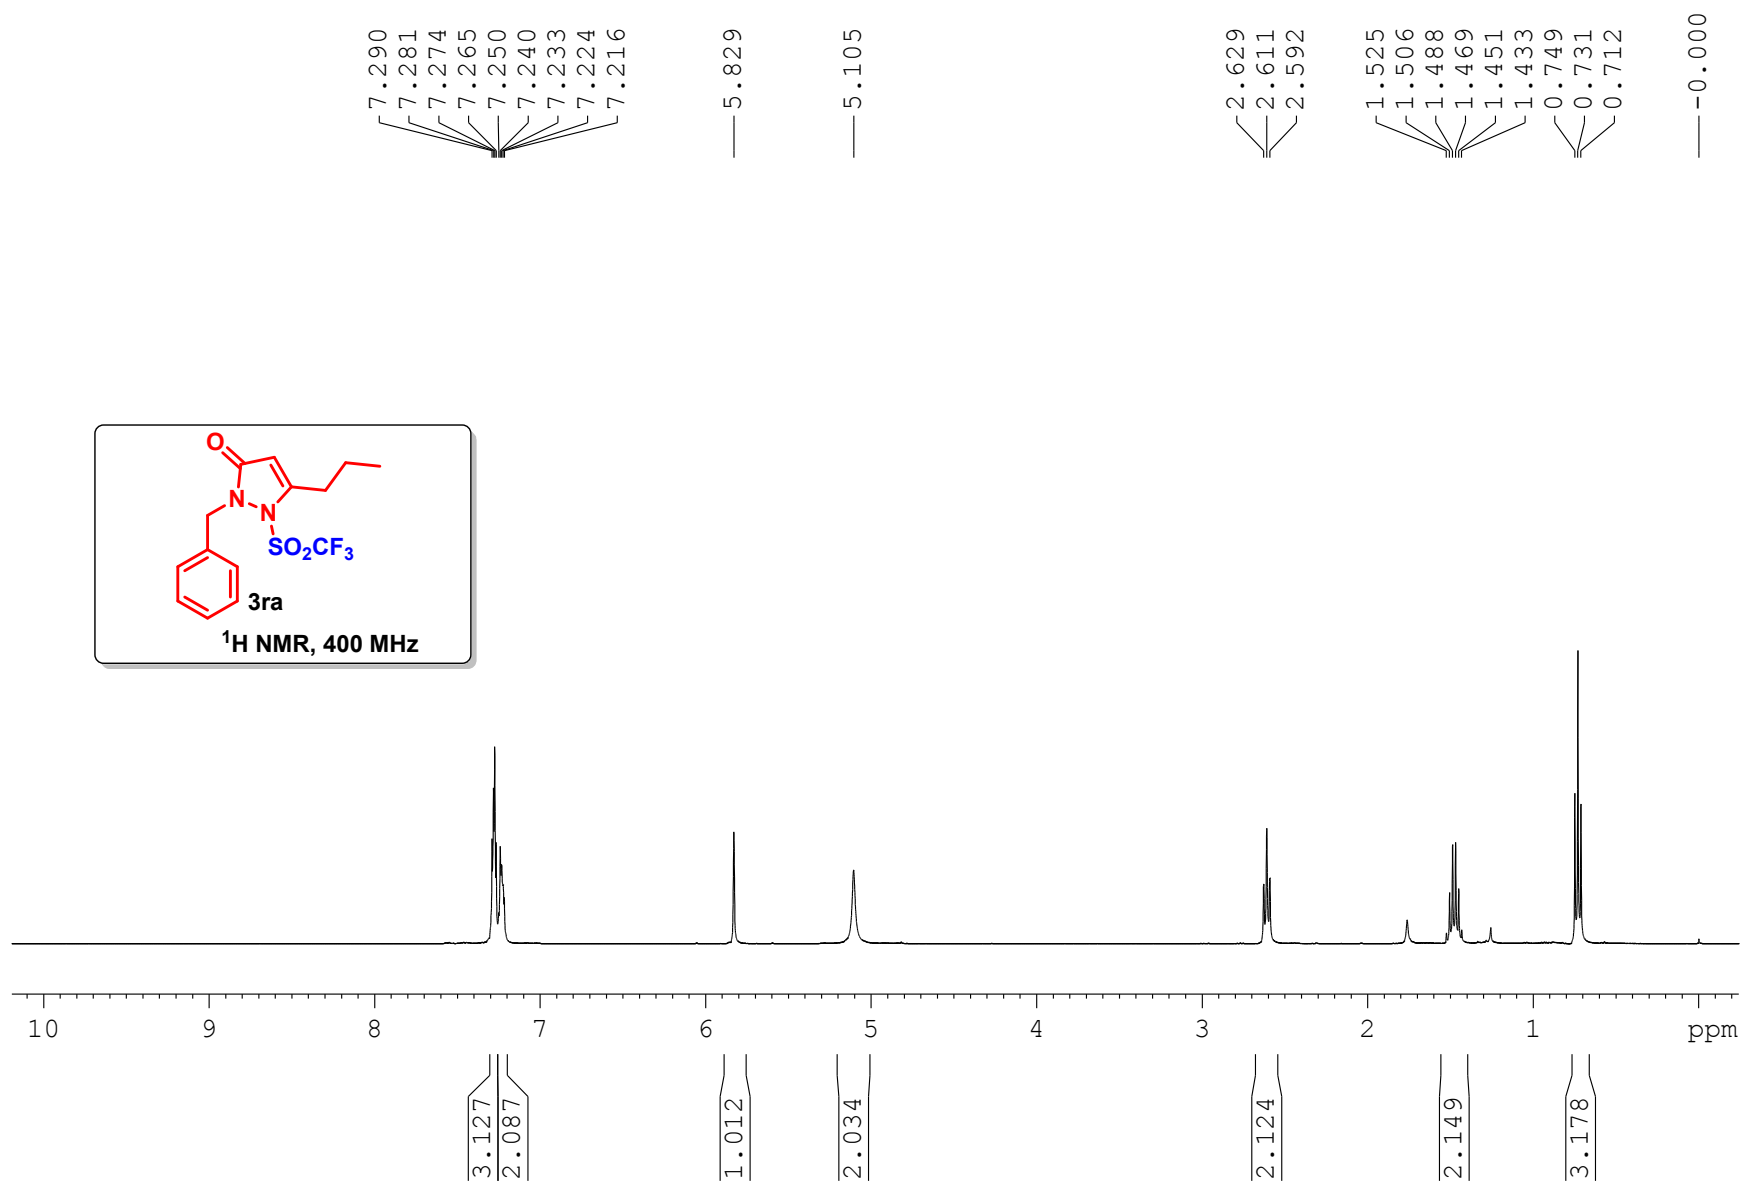

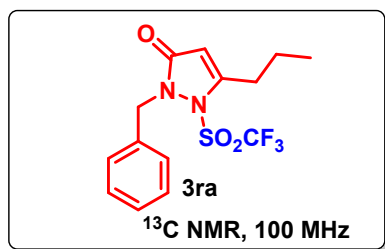

— 170.527

— 162.625

134.118

128.980

128.698

128.531

124.925

121.636

118.349

115.061

110.597

77.472

77.154

76.836

— 52.467

— 30.799

— 21.196

— 12.950

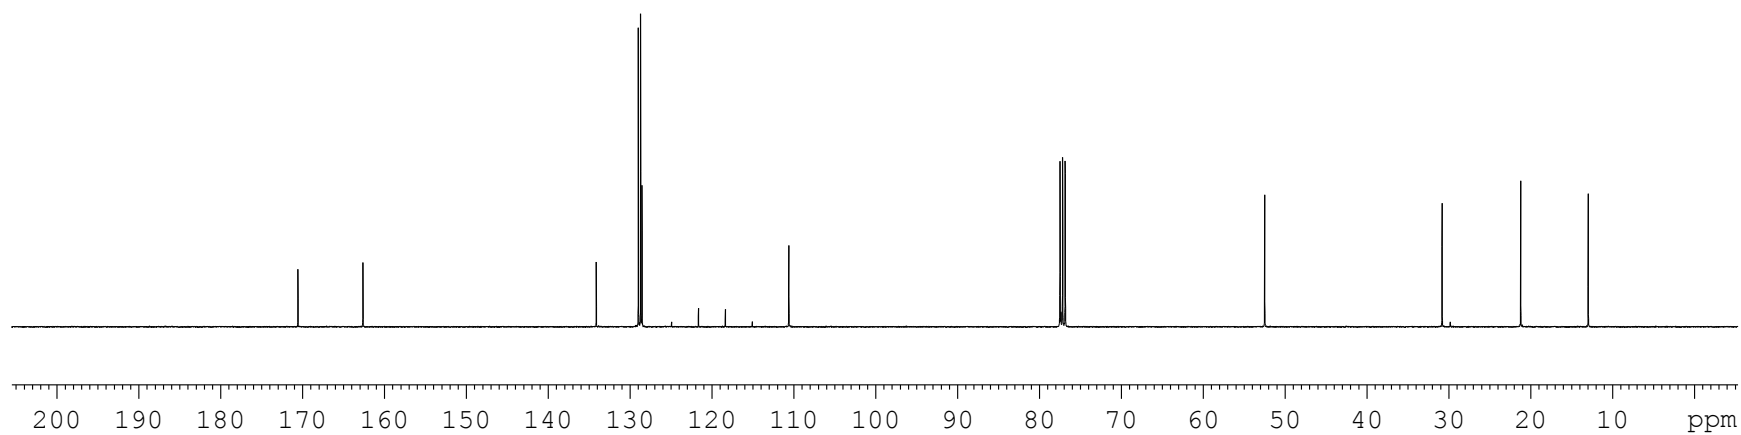

— -68.244

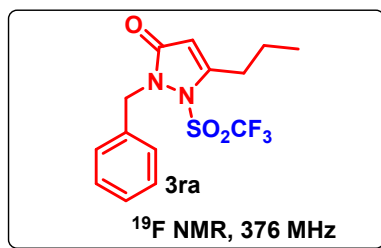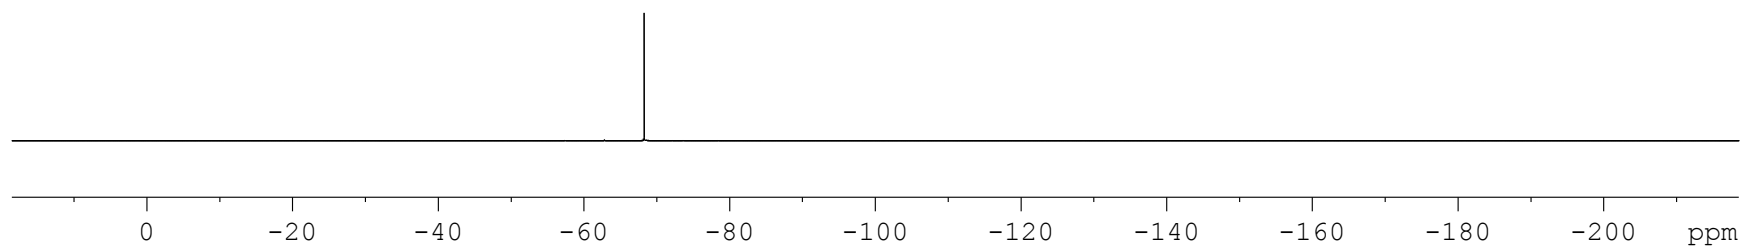

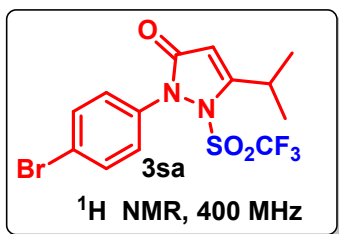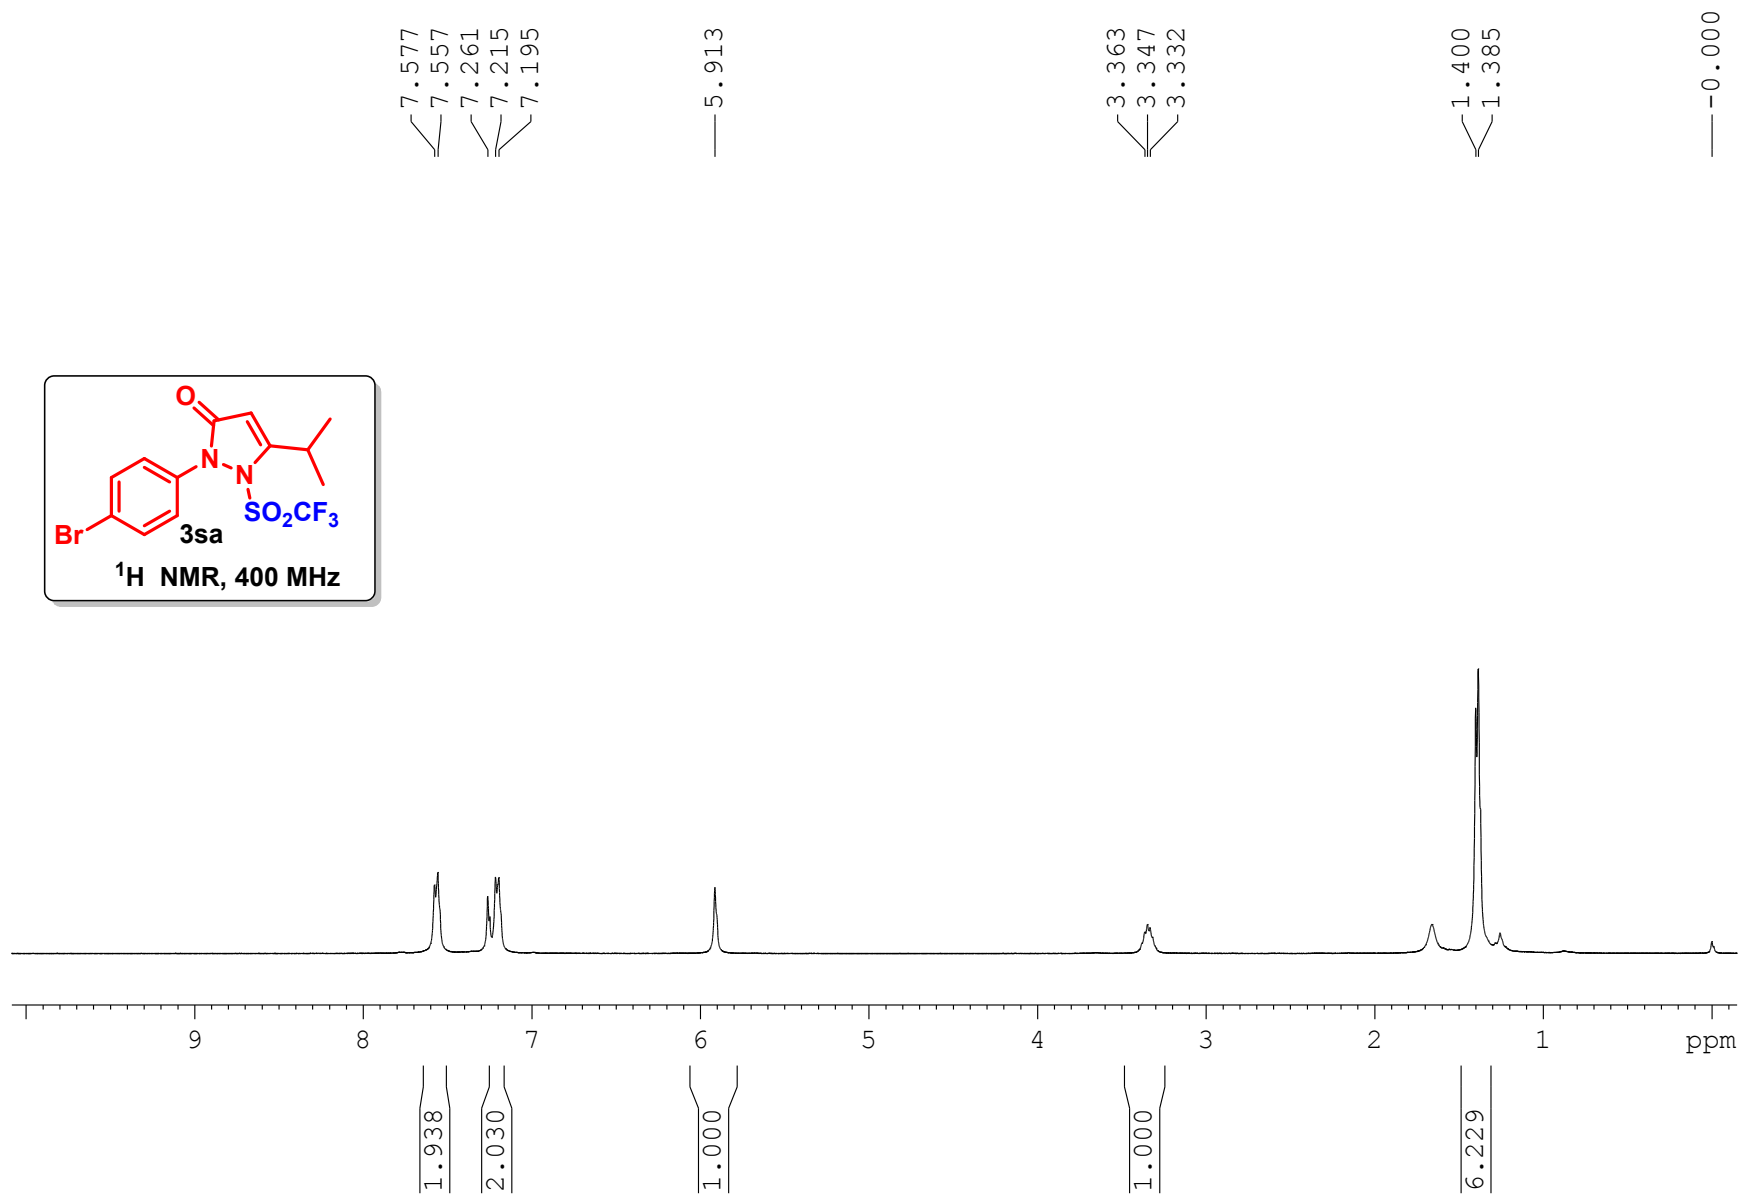

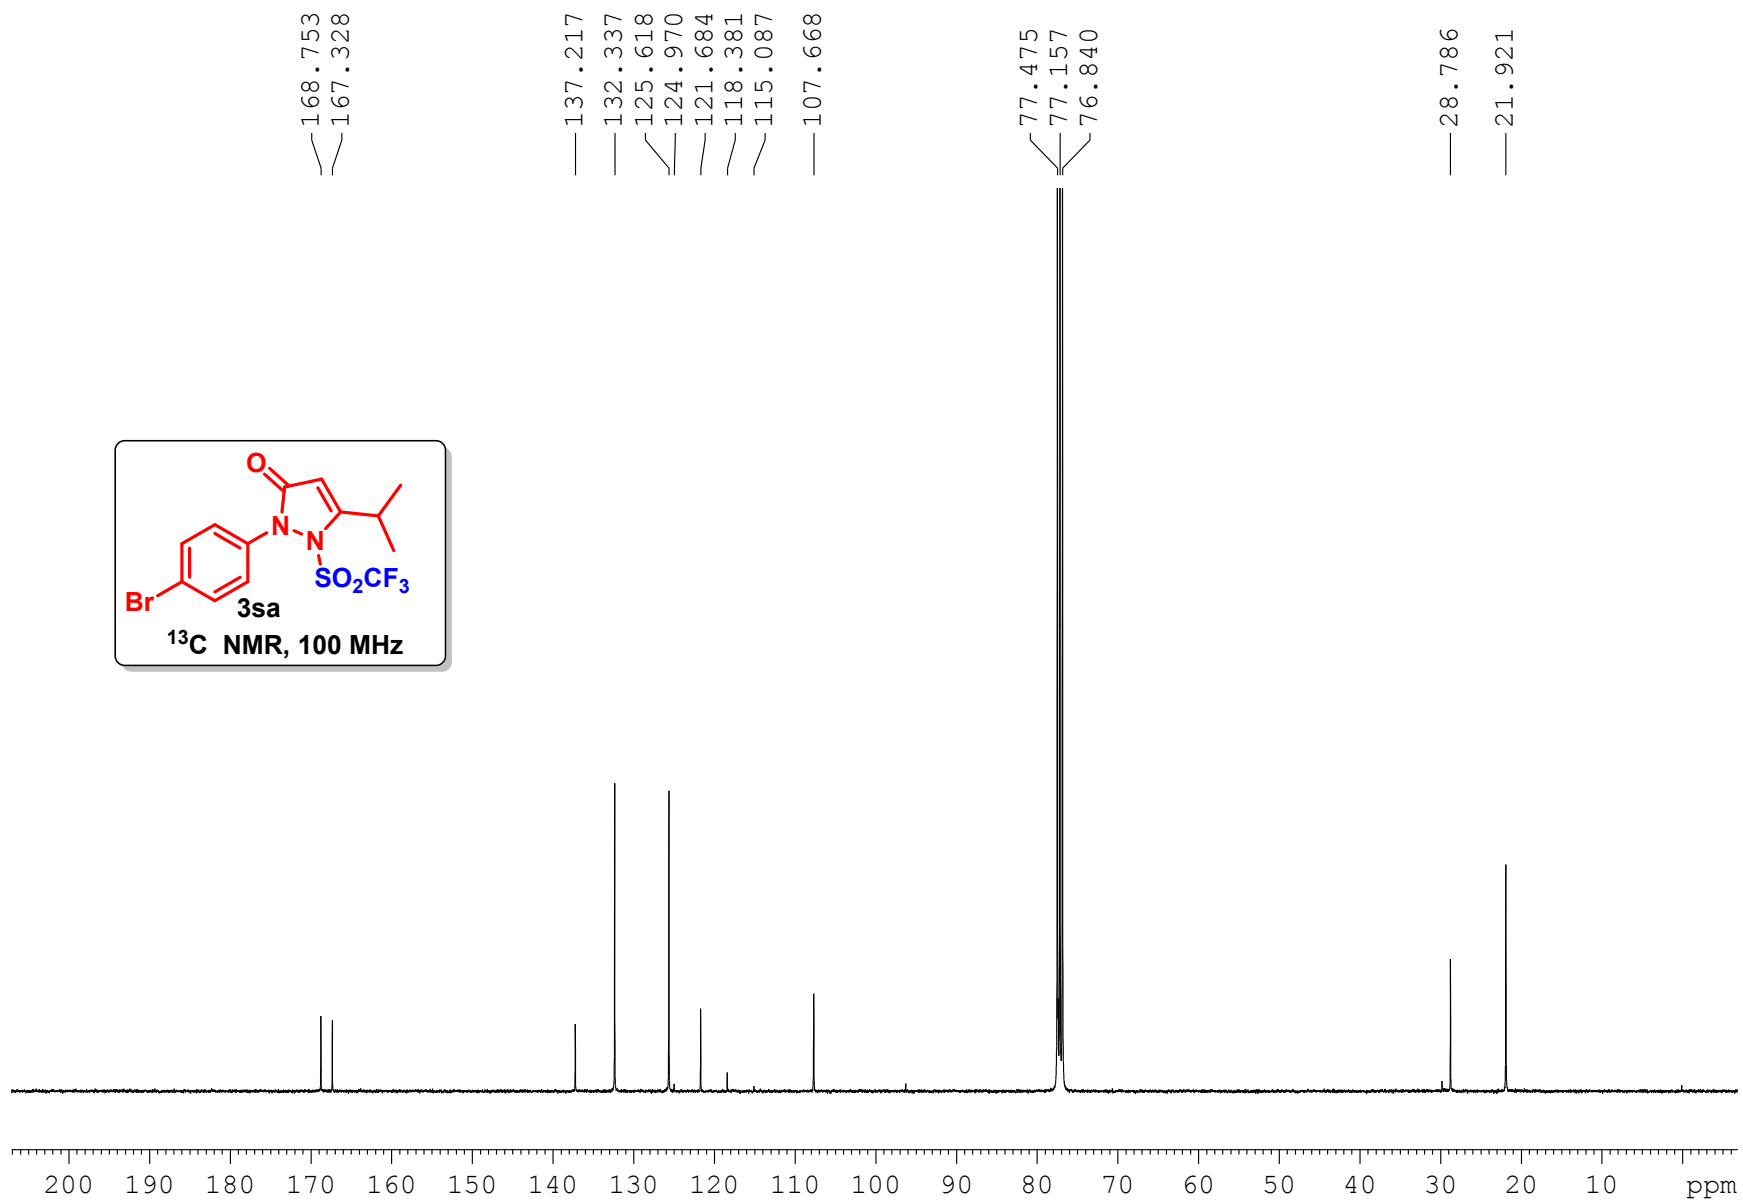

— -67.684

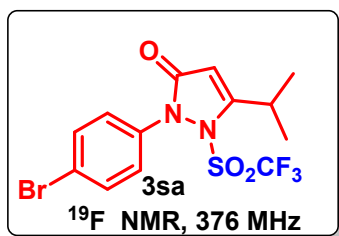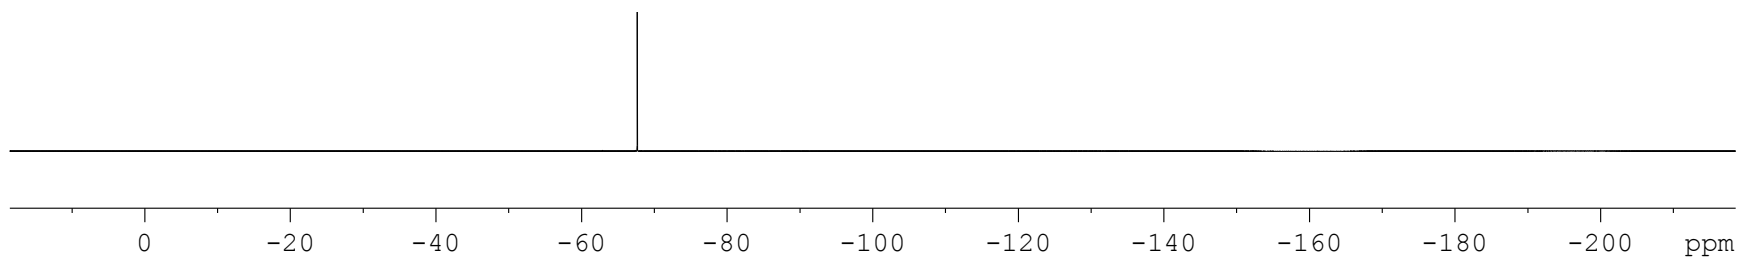



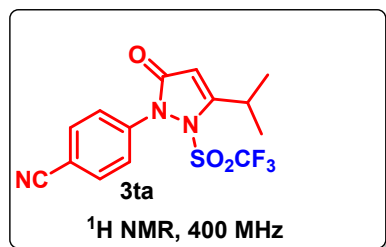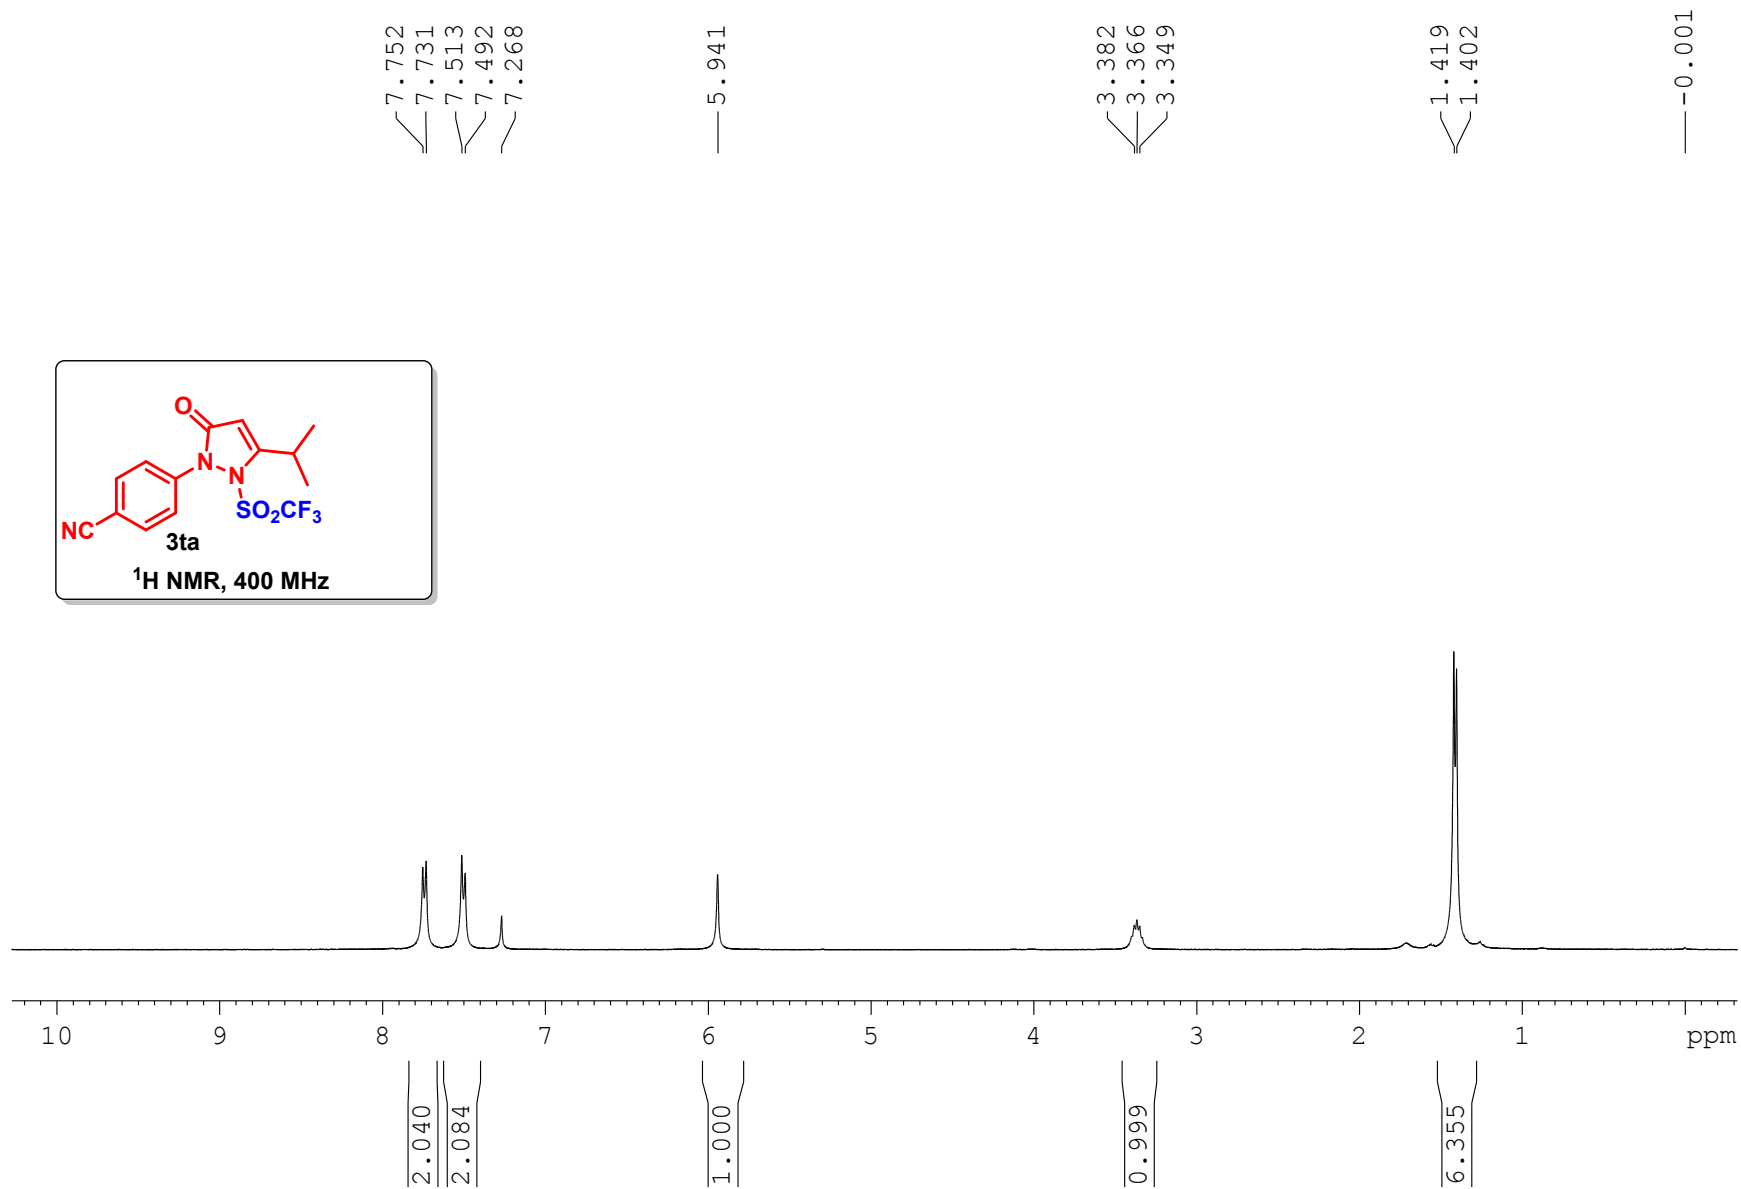

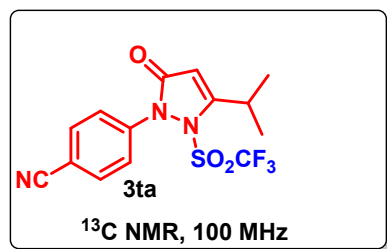

— 169.258  
 — 166.575

— 141.733  
 — 133.046  
 — 124.863  
 — 123.600  
 — 121.567  
 — 118.271  
 — 118.216  
 — 114.976  
 — 111.061  
 — 107.669

— 77.476  
 — 77.158  
 — 76.840

— 28.838  
 — 21.836

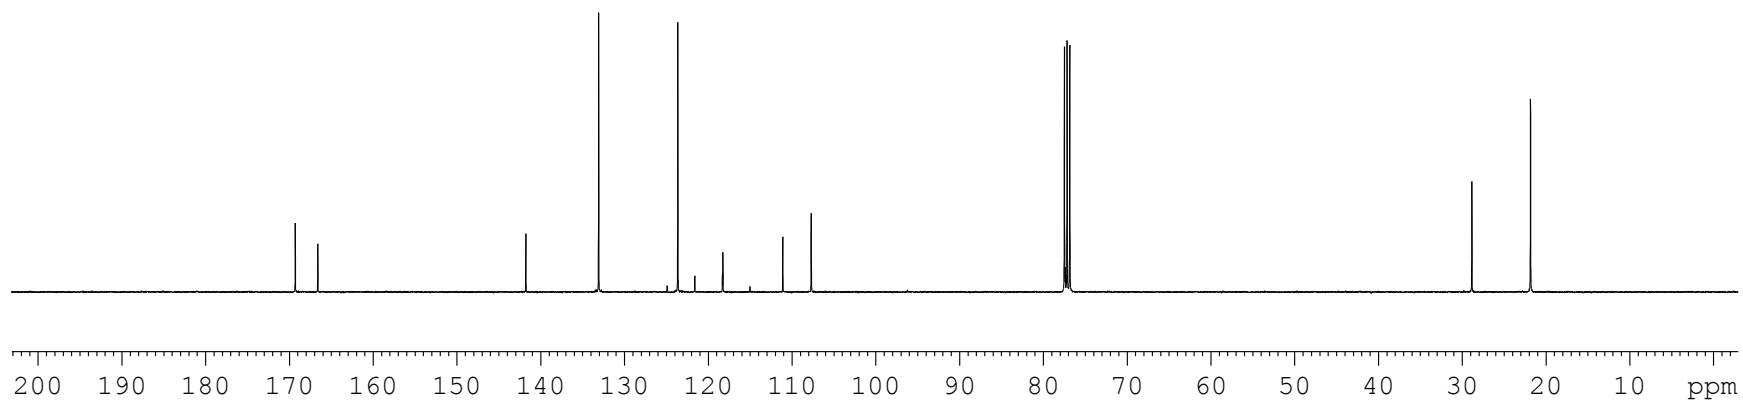

— -67.424

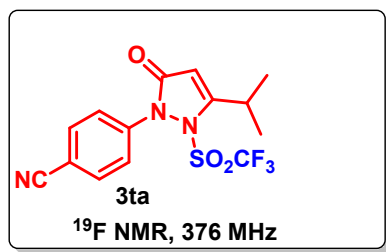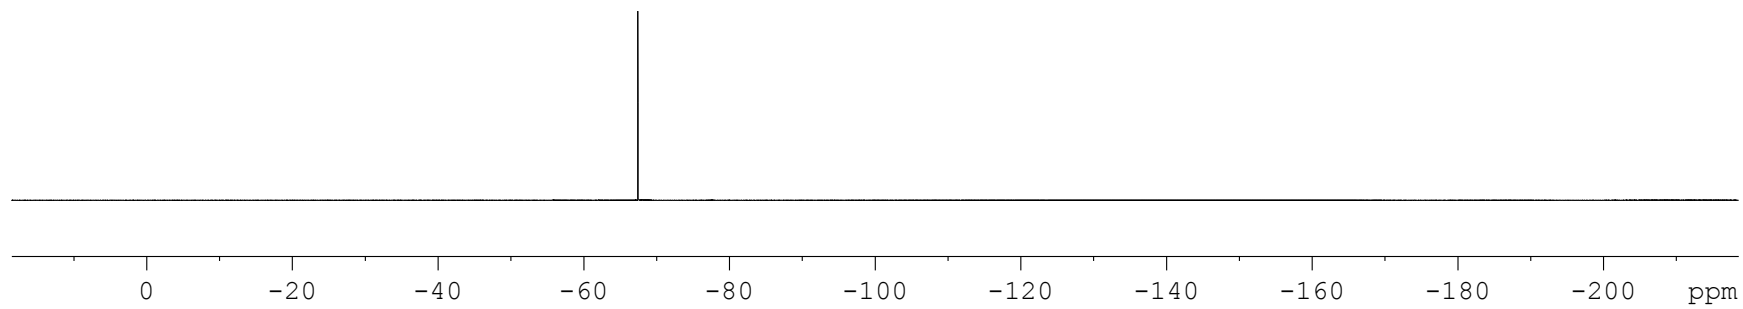

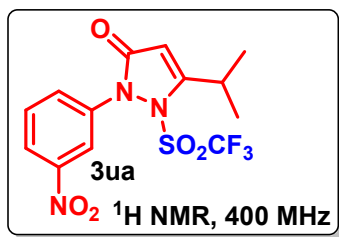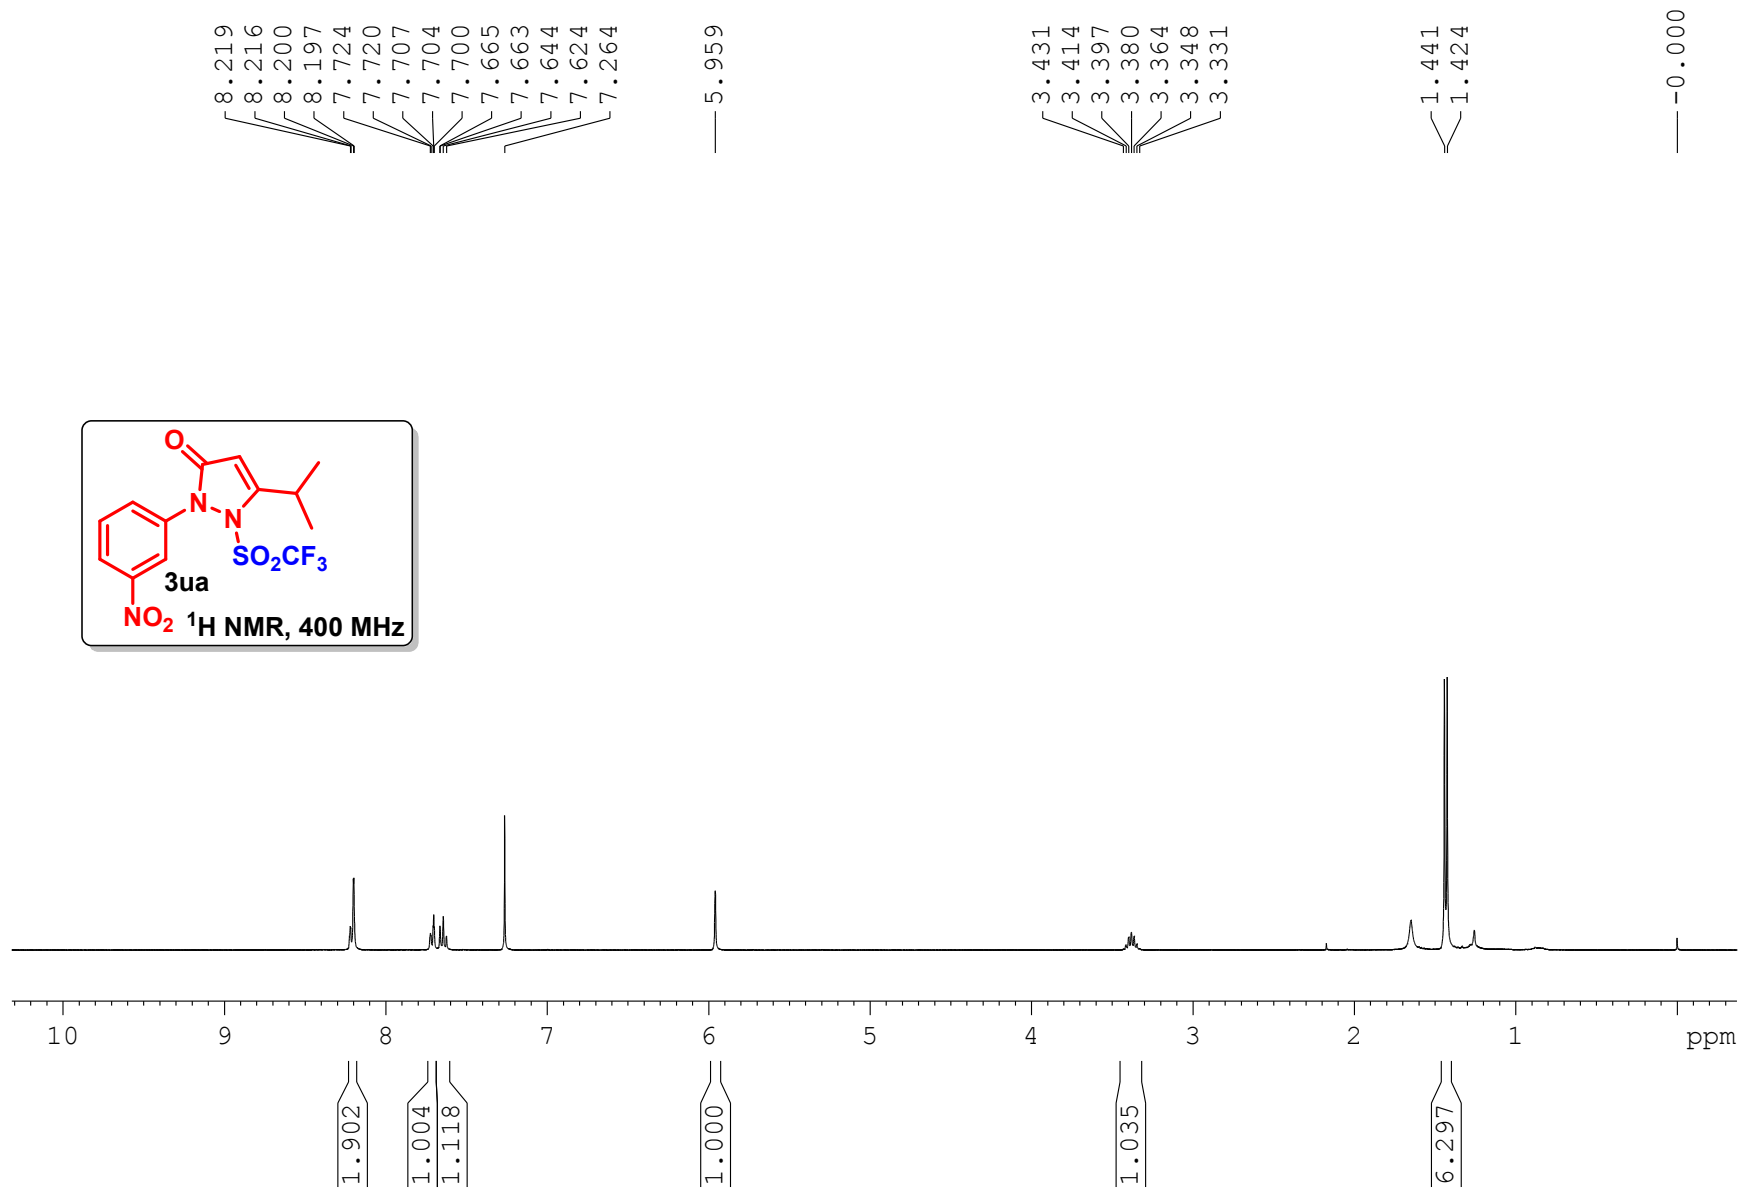

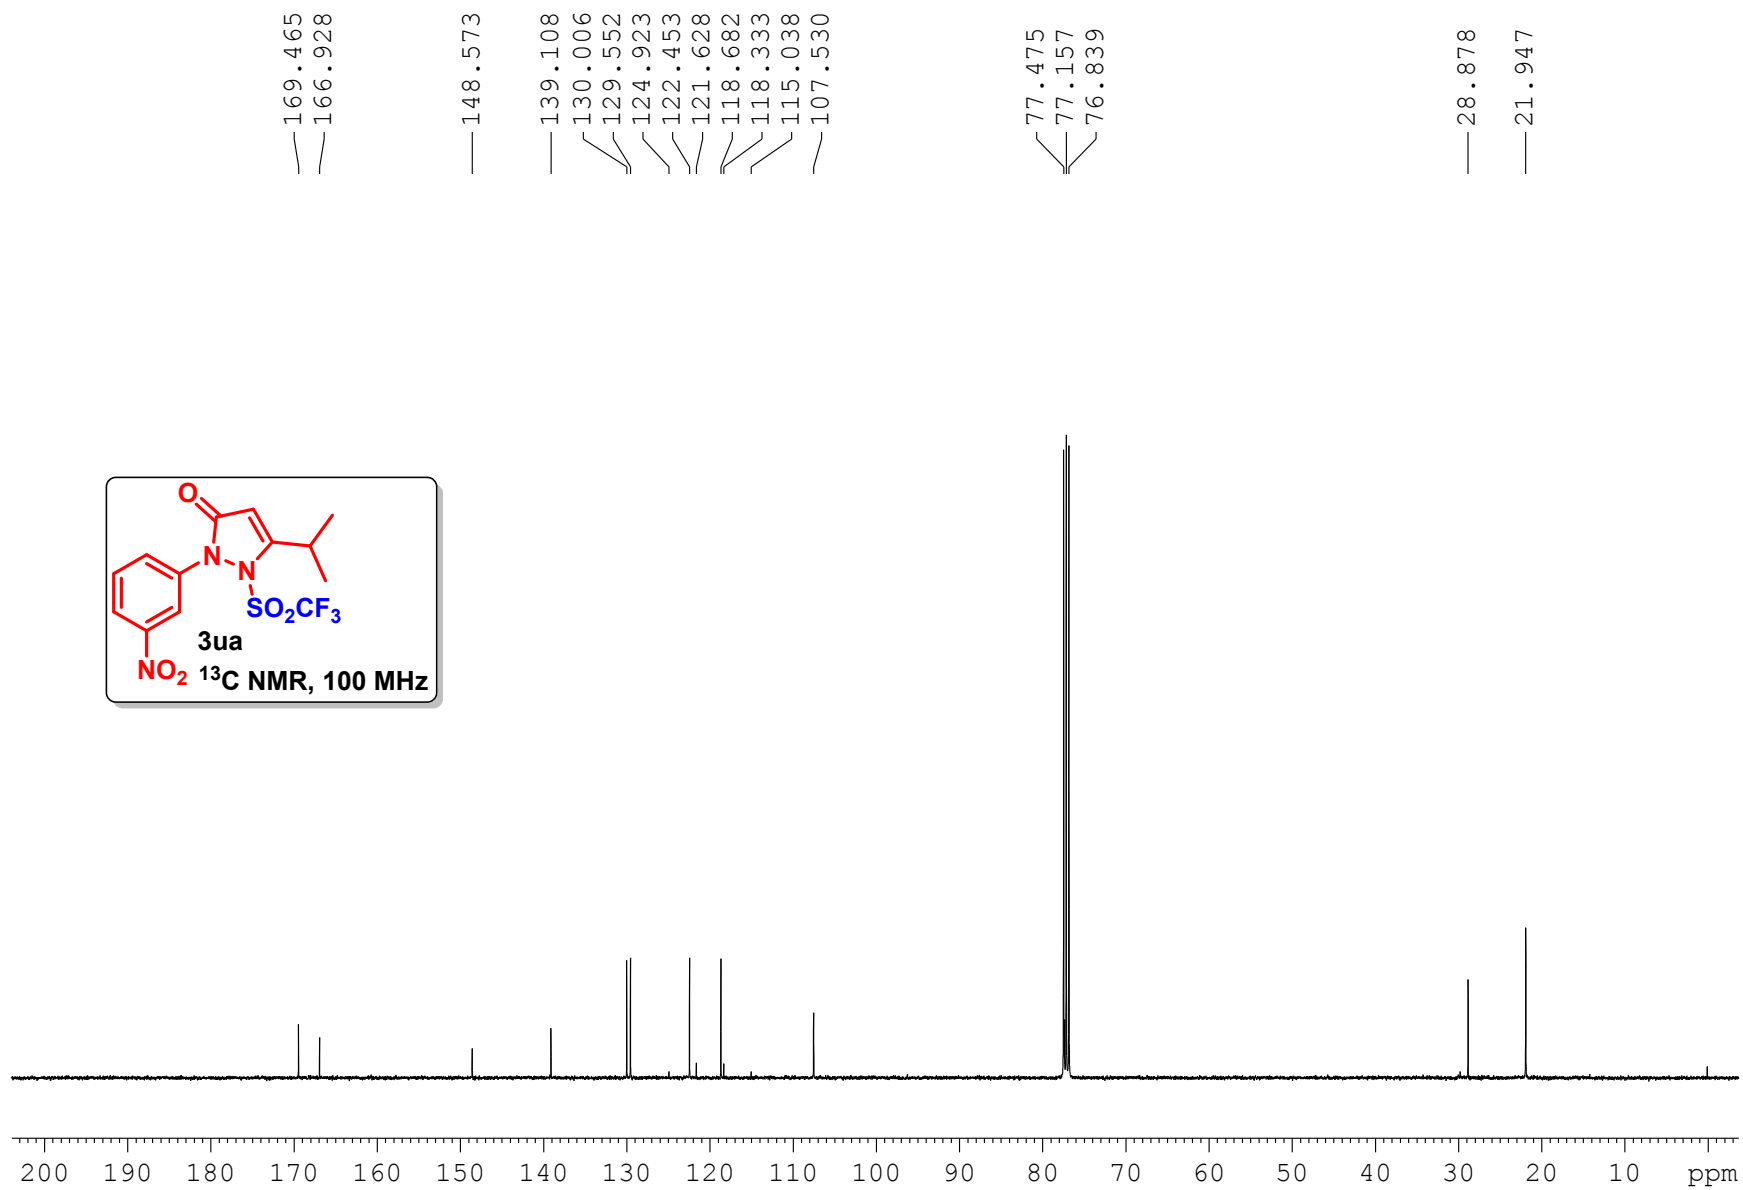

— -67.438

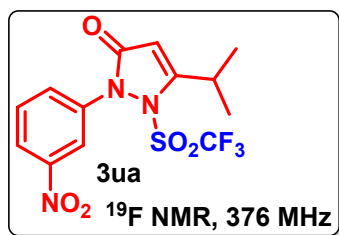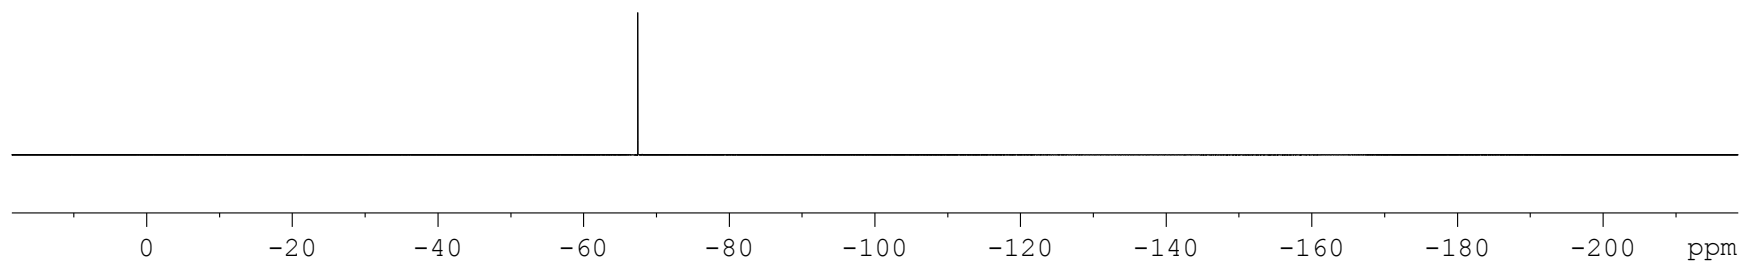

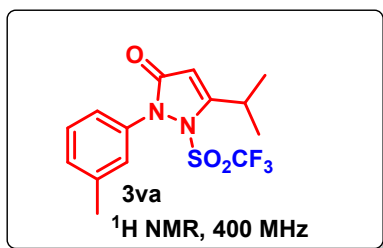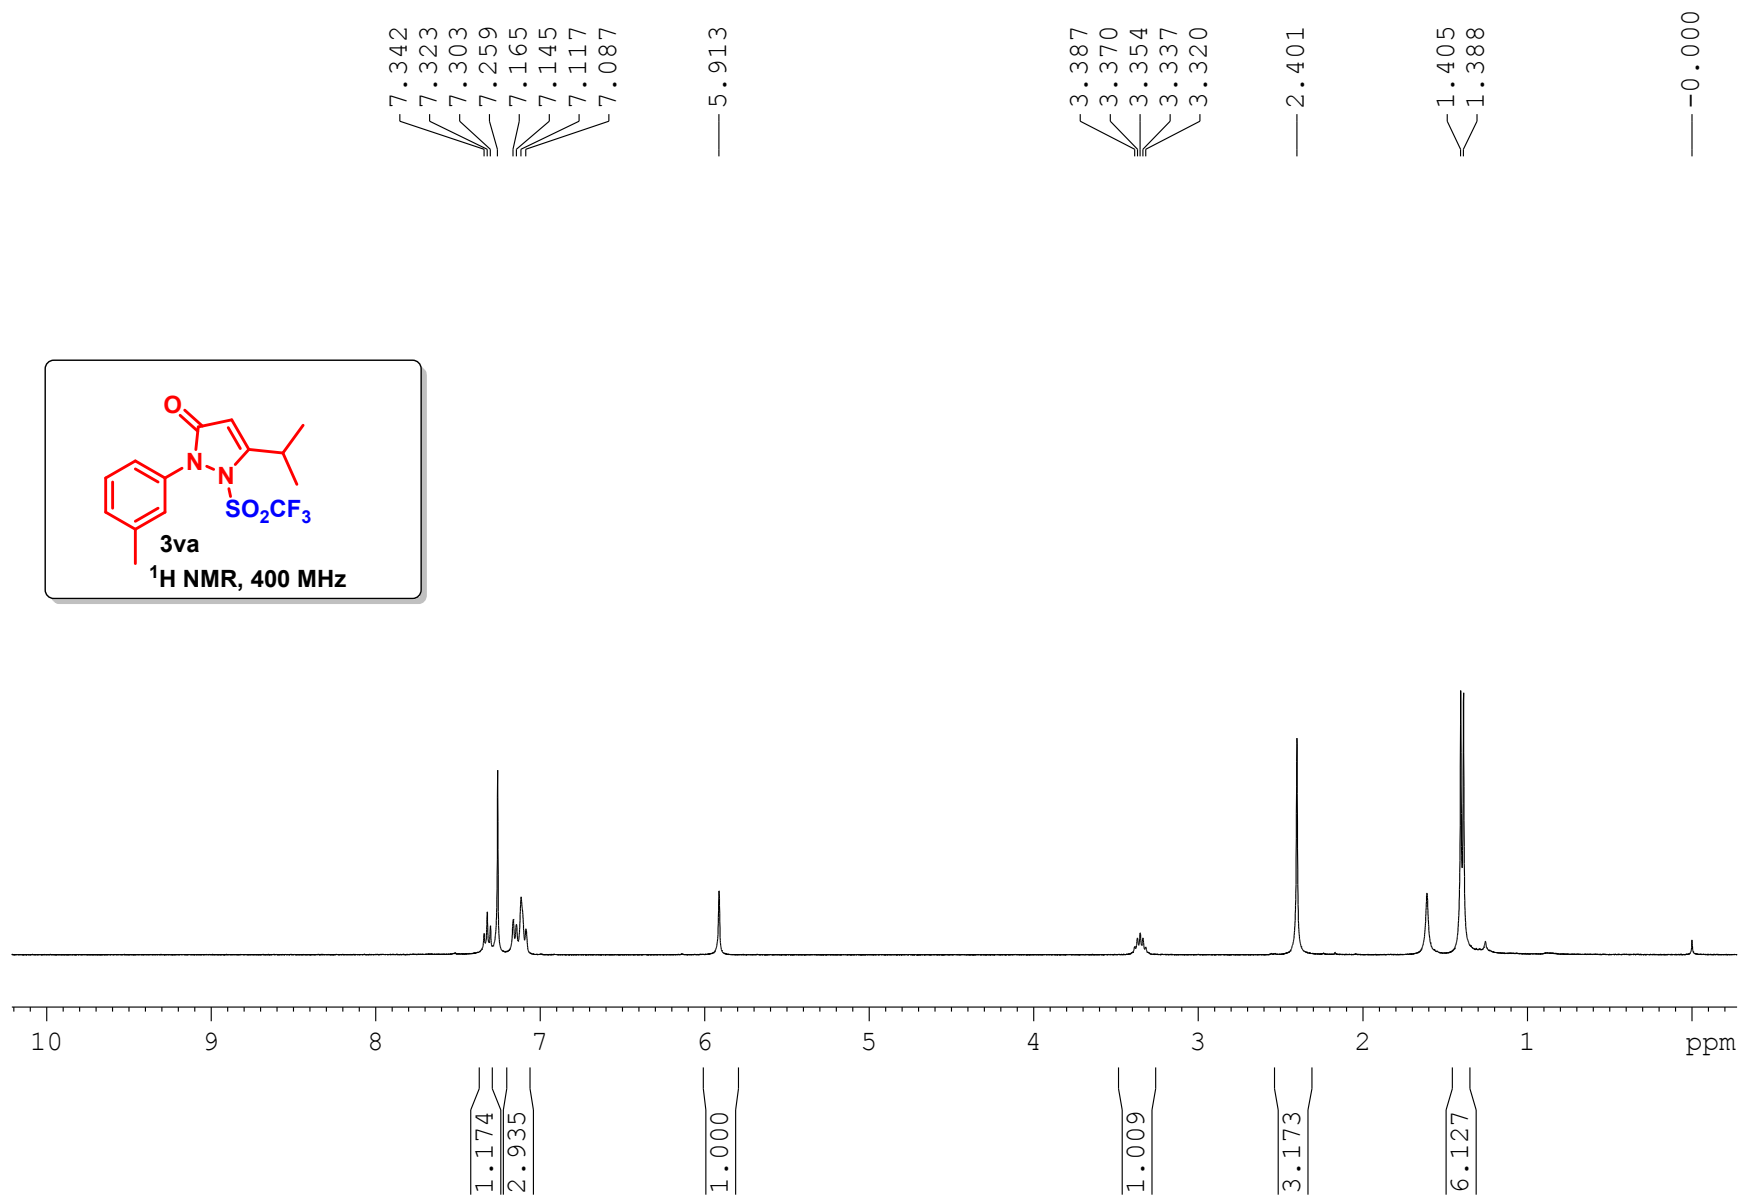

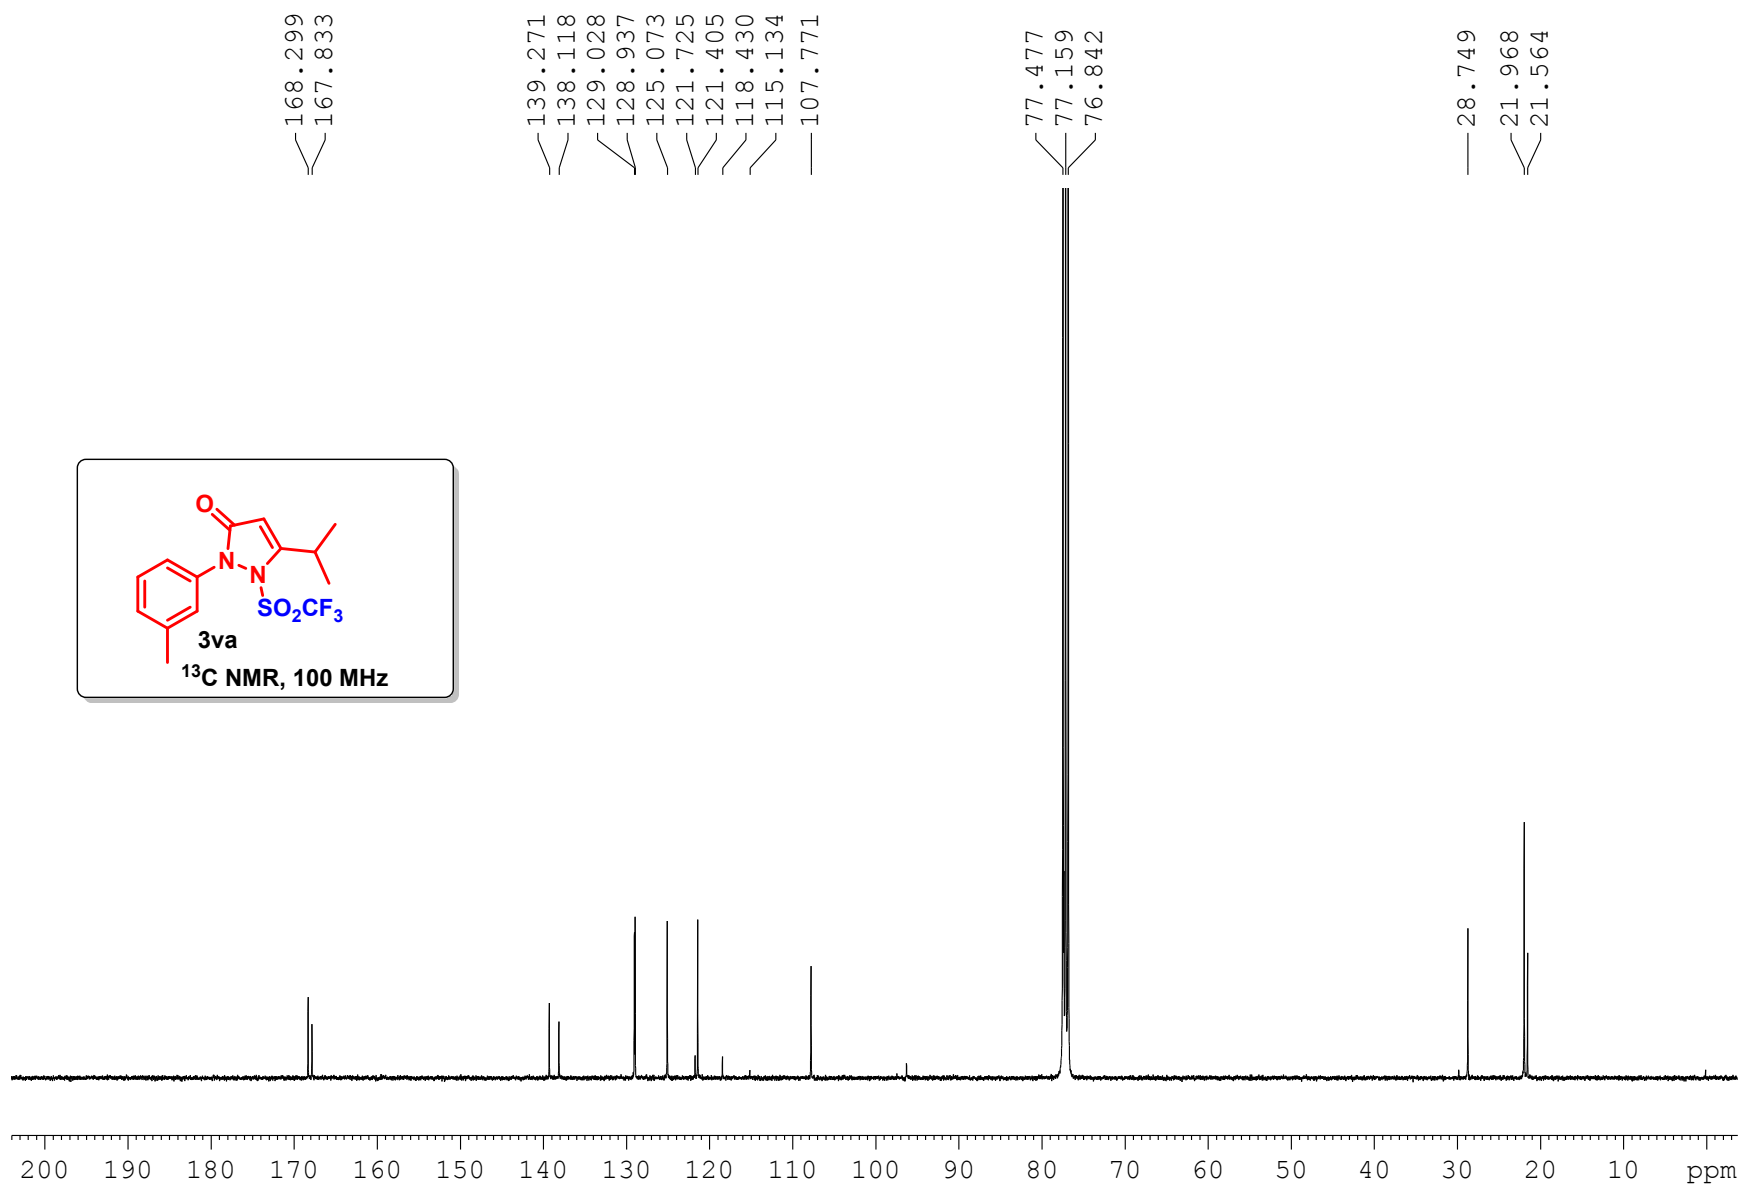



— -67.845

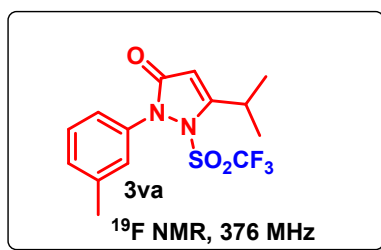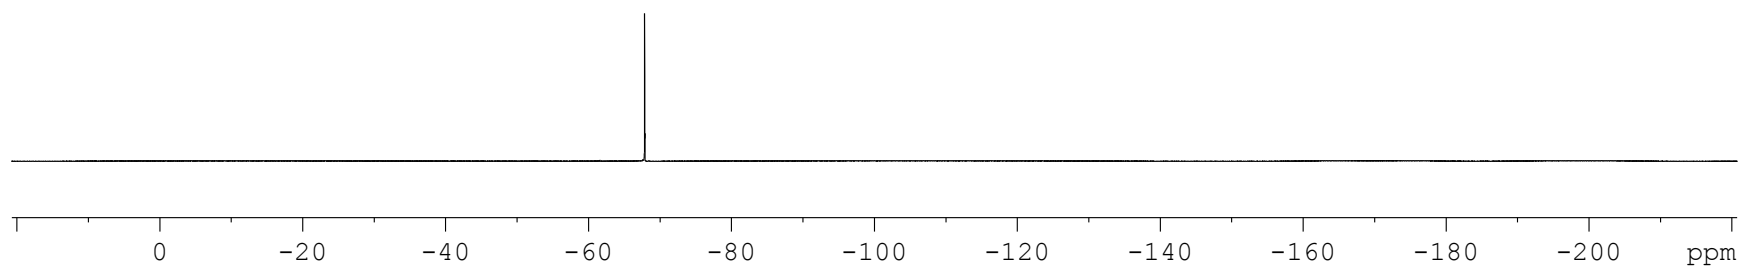

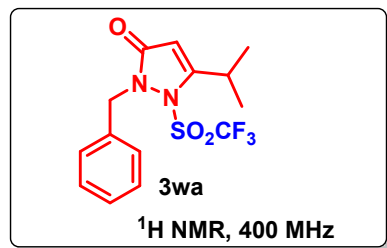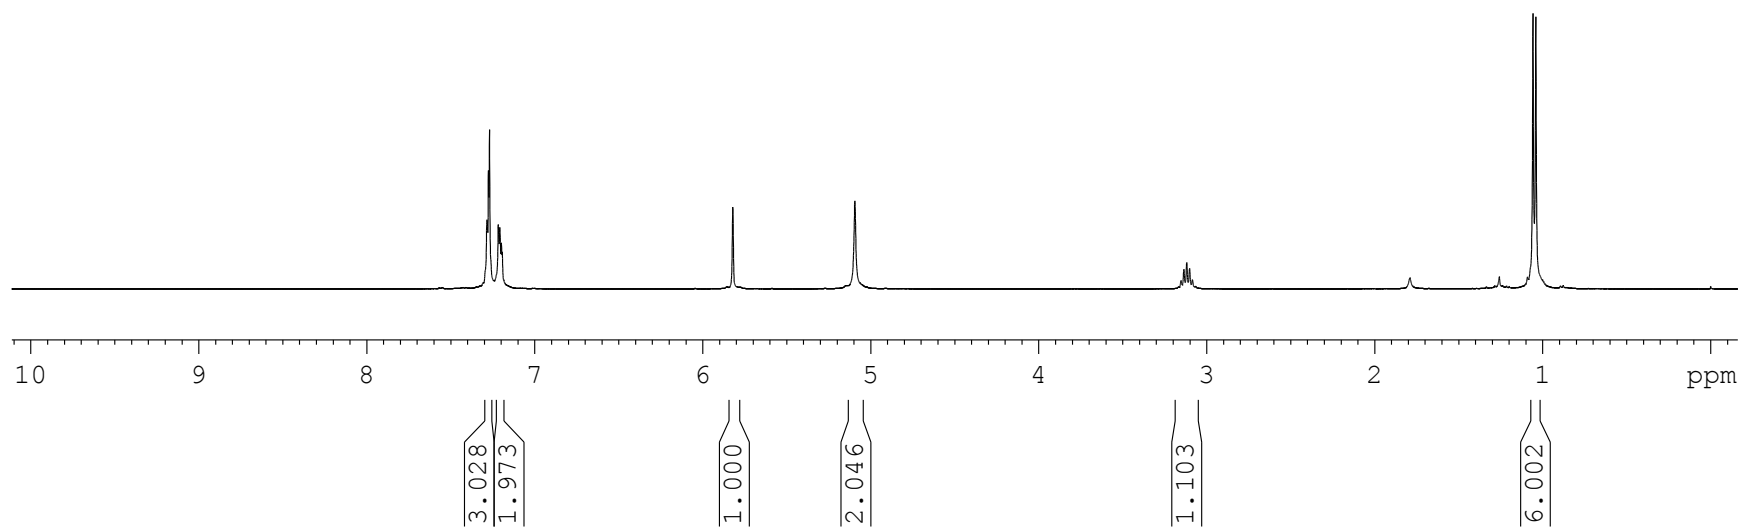

7.285  
 7.283  
 7.275  
 7.268  
 7.216  
 7.207  
 7.198  
 7.192

— 5.820

— 5.095

3.170  
 3.152  
 3.135  
 3.119  
 3.102  
 3.085  
 3.069

1.058  
 1.041

— 0.000

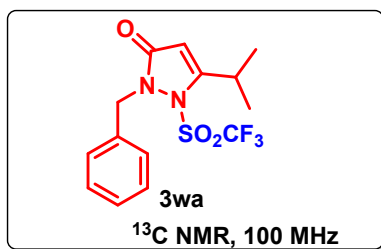

170.911  
 169.593

134.079  
 128.883  
 128.595  
 128.493  
 124.923  
 121.633  
 118.343  
 115.055  
 108.636

77.477  
 77.159  
 76.841

53.066

28.394  
 21.569

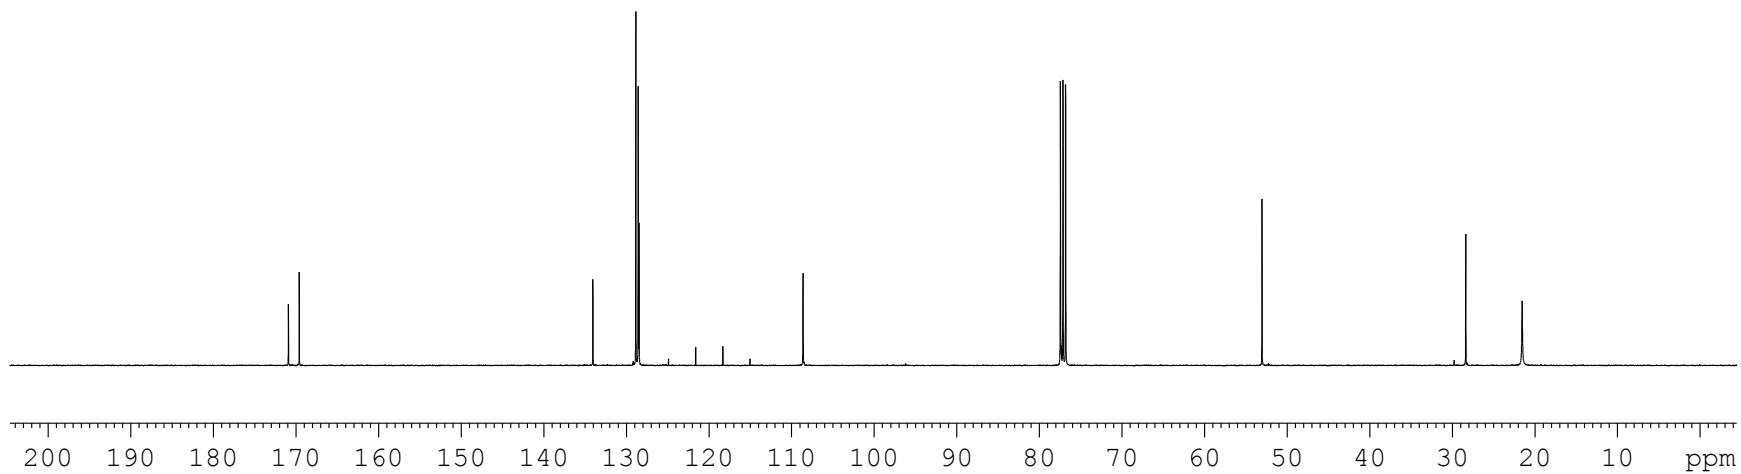

— -68.287

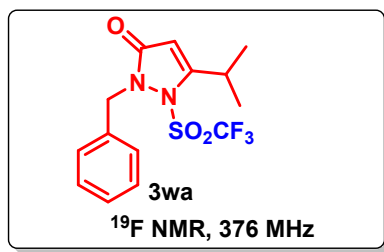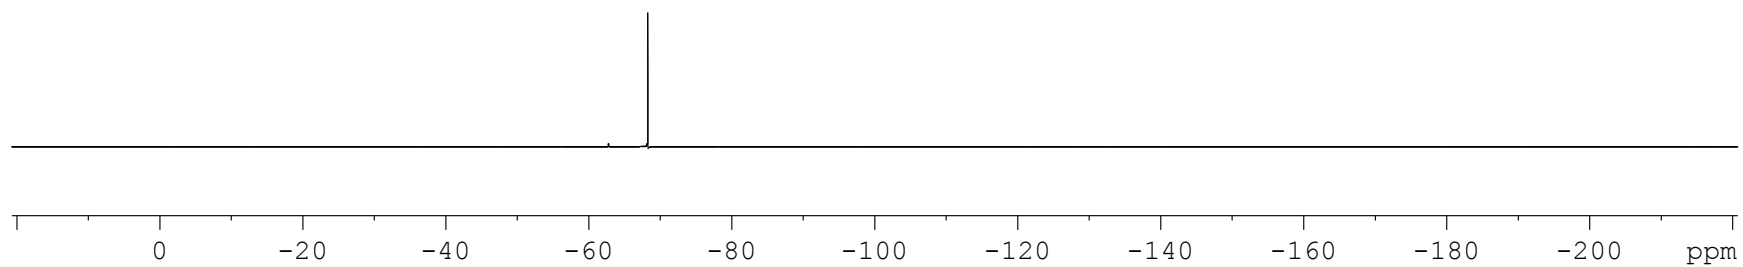

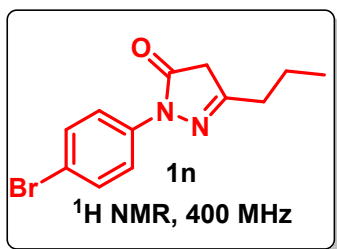

7.811  
 7.789  
 7.495  
 7.473  
 7.266

3.407  
 2.483  
 2.464  
 2.445  
 1.727  
 1.708  
 1.689  
 1.670  
 1.652  
 1.633  
 1.040  
 1.021  
 1.003  
 -0.001

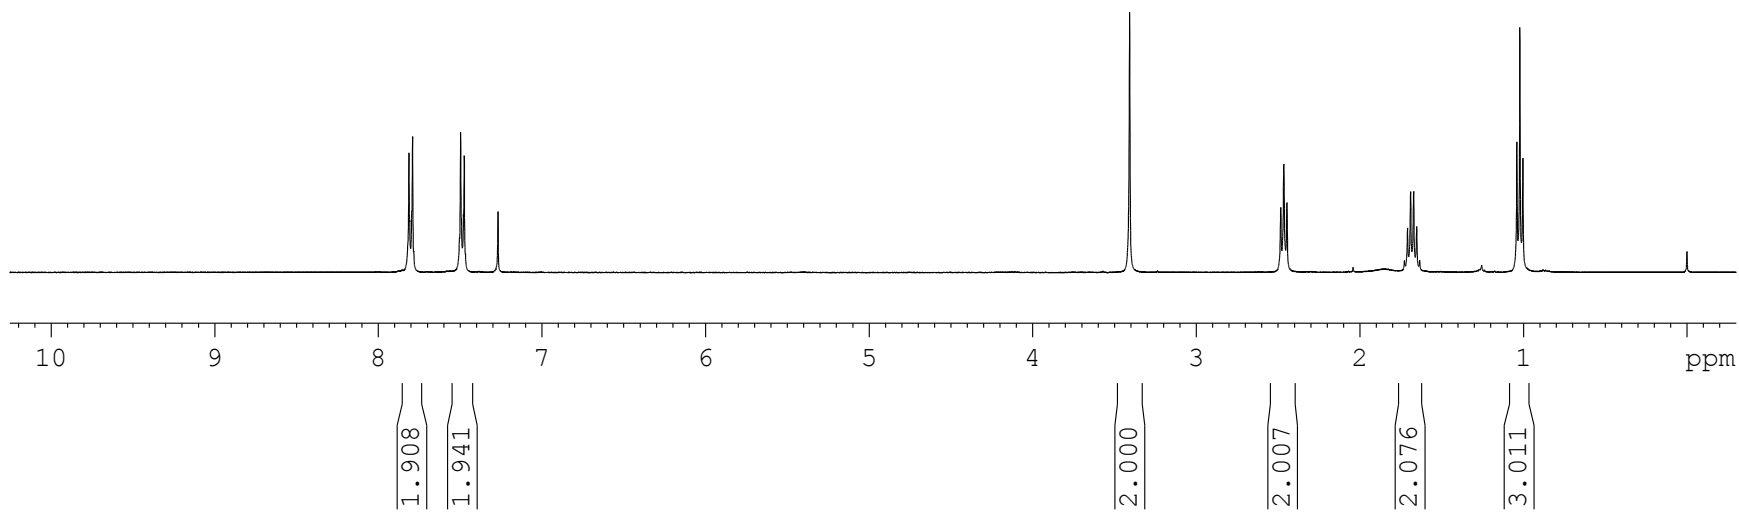

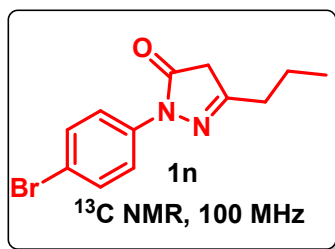

—170.595

—160.346

—137.350

—131.879

—120.273

—117.821

77.478

77.160

76.843

—41.868

—33.236

—20.059

—13.886

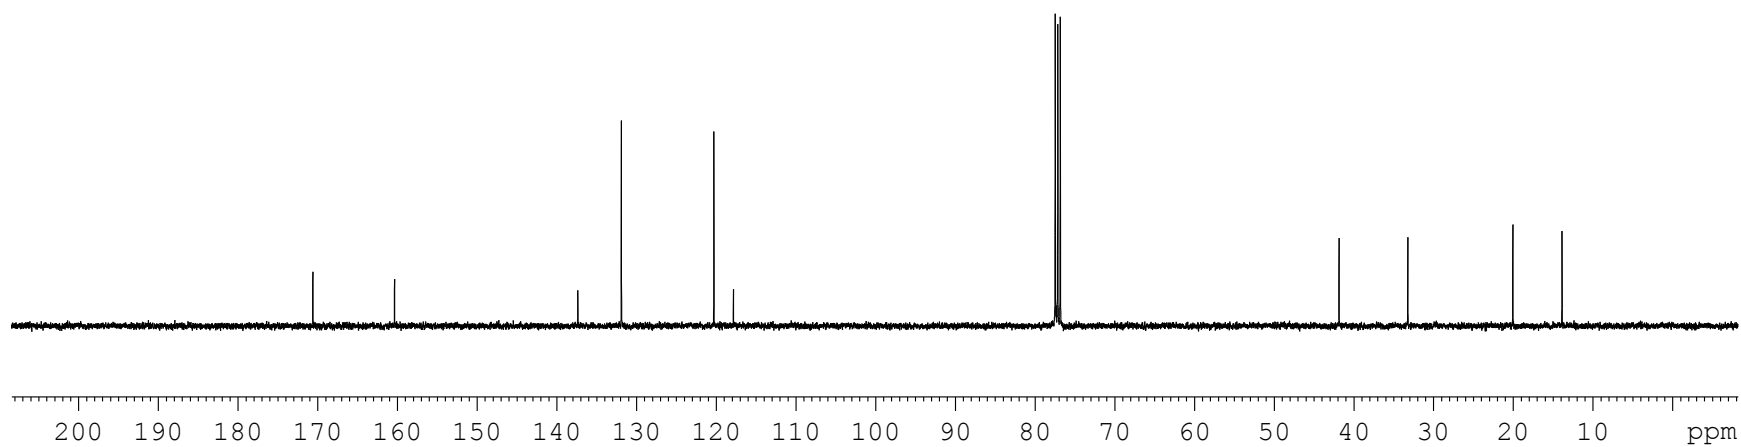

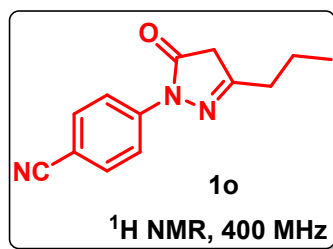

8.069  
 8.046  
 7.650  
 7.628  
 7.299

3.476  
 2.517  
 2.498  
 2.479  
 1.753  
 1.734  
 1.715  
 1.696  
 1.678  
 1.659  
 1.056  
 1.038  
 1.019

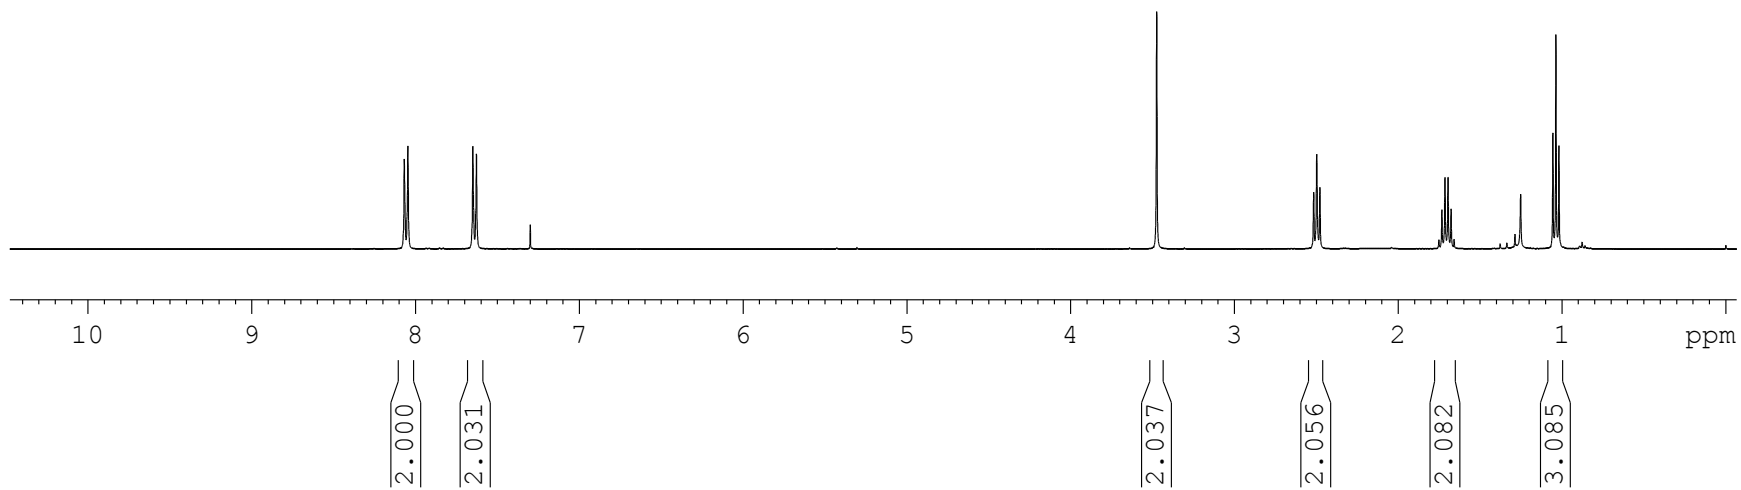

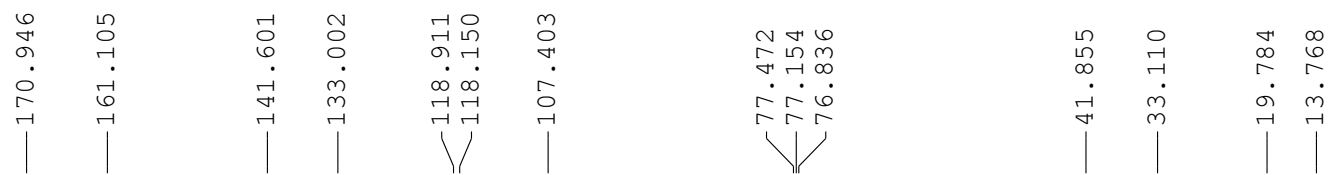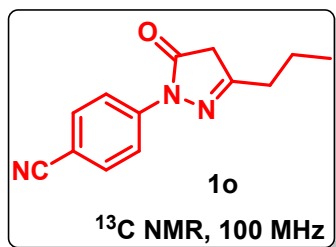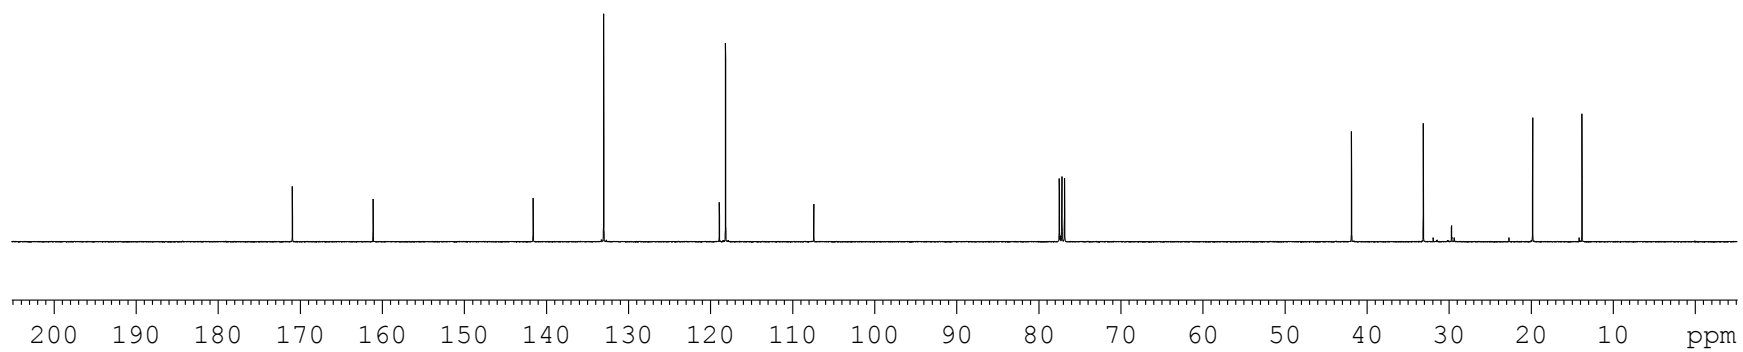



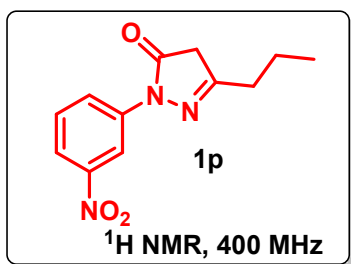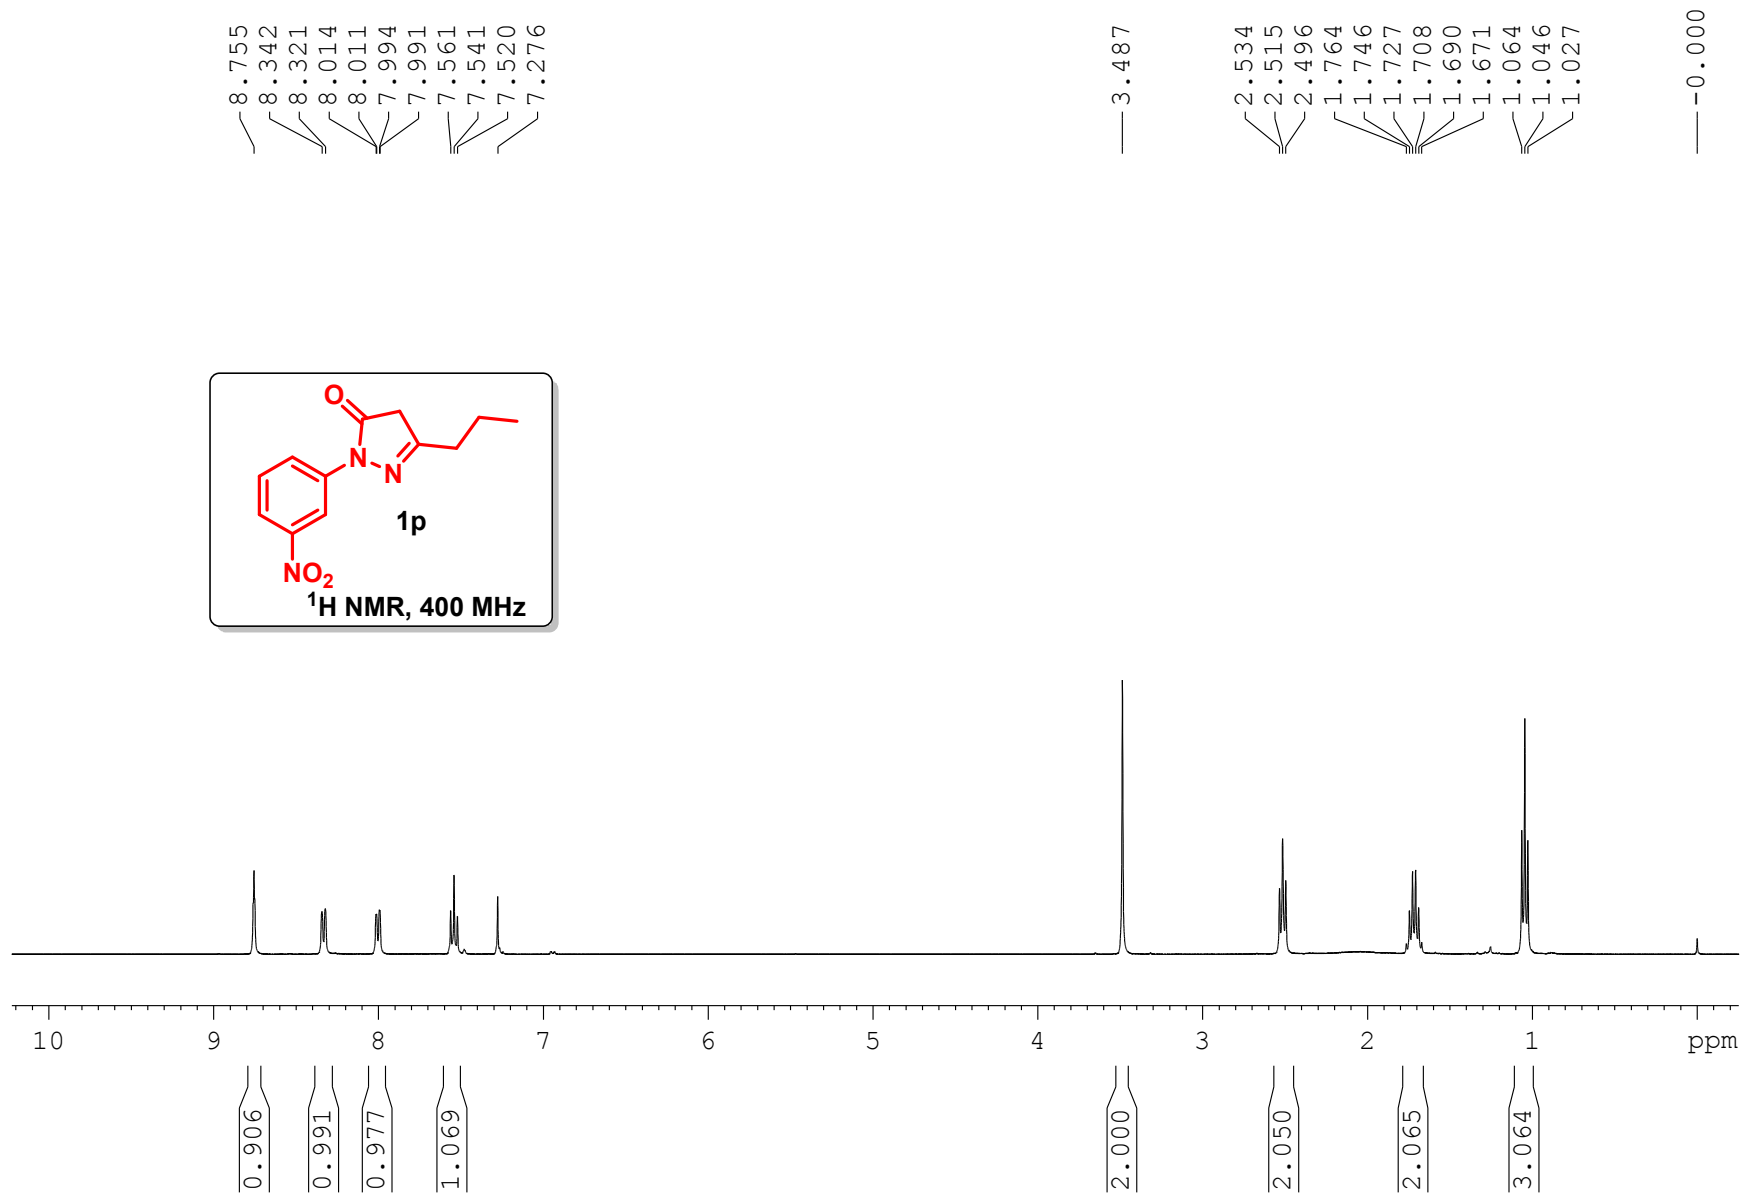

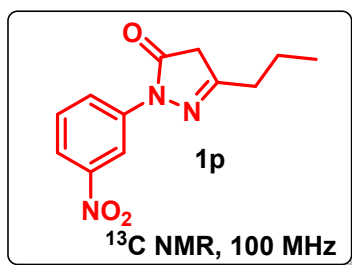

— 170.847  
 — 161.021  
 — 148.661  
 — 139.183  
 — 129.789  
 — 123.811  
 — 119.247  
 — 113.341

77.475  
 77.157  
 76.840

— 41.918  
 — 33.218  
 — 20.000  
 — 13.872

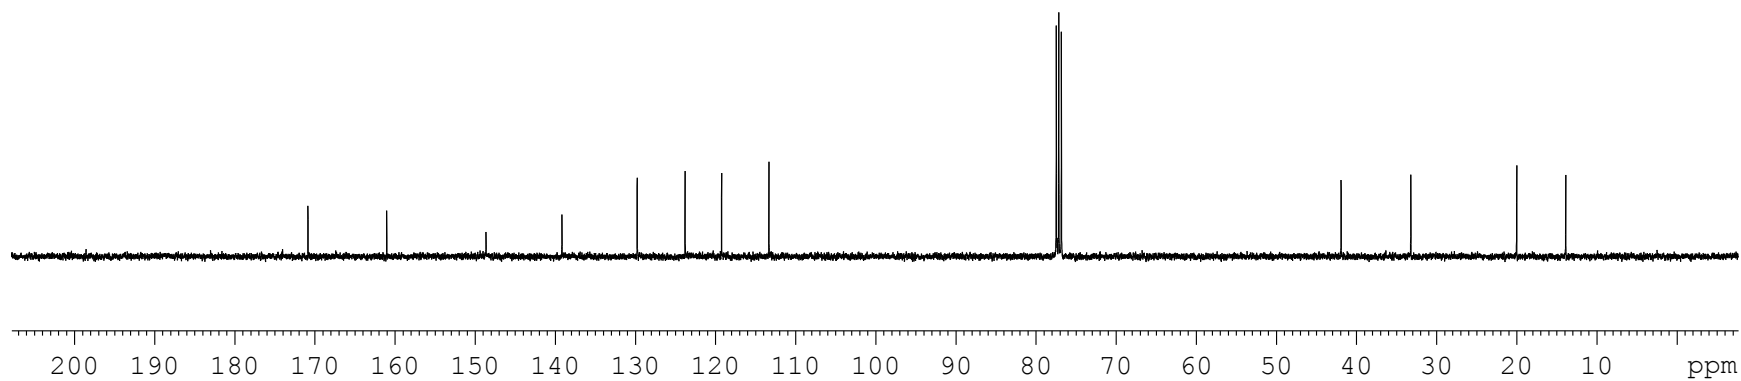

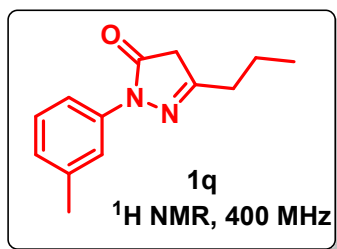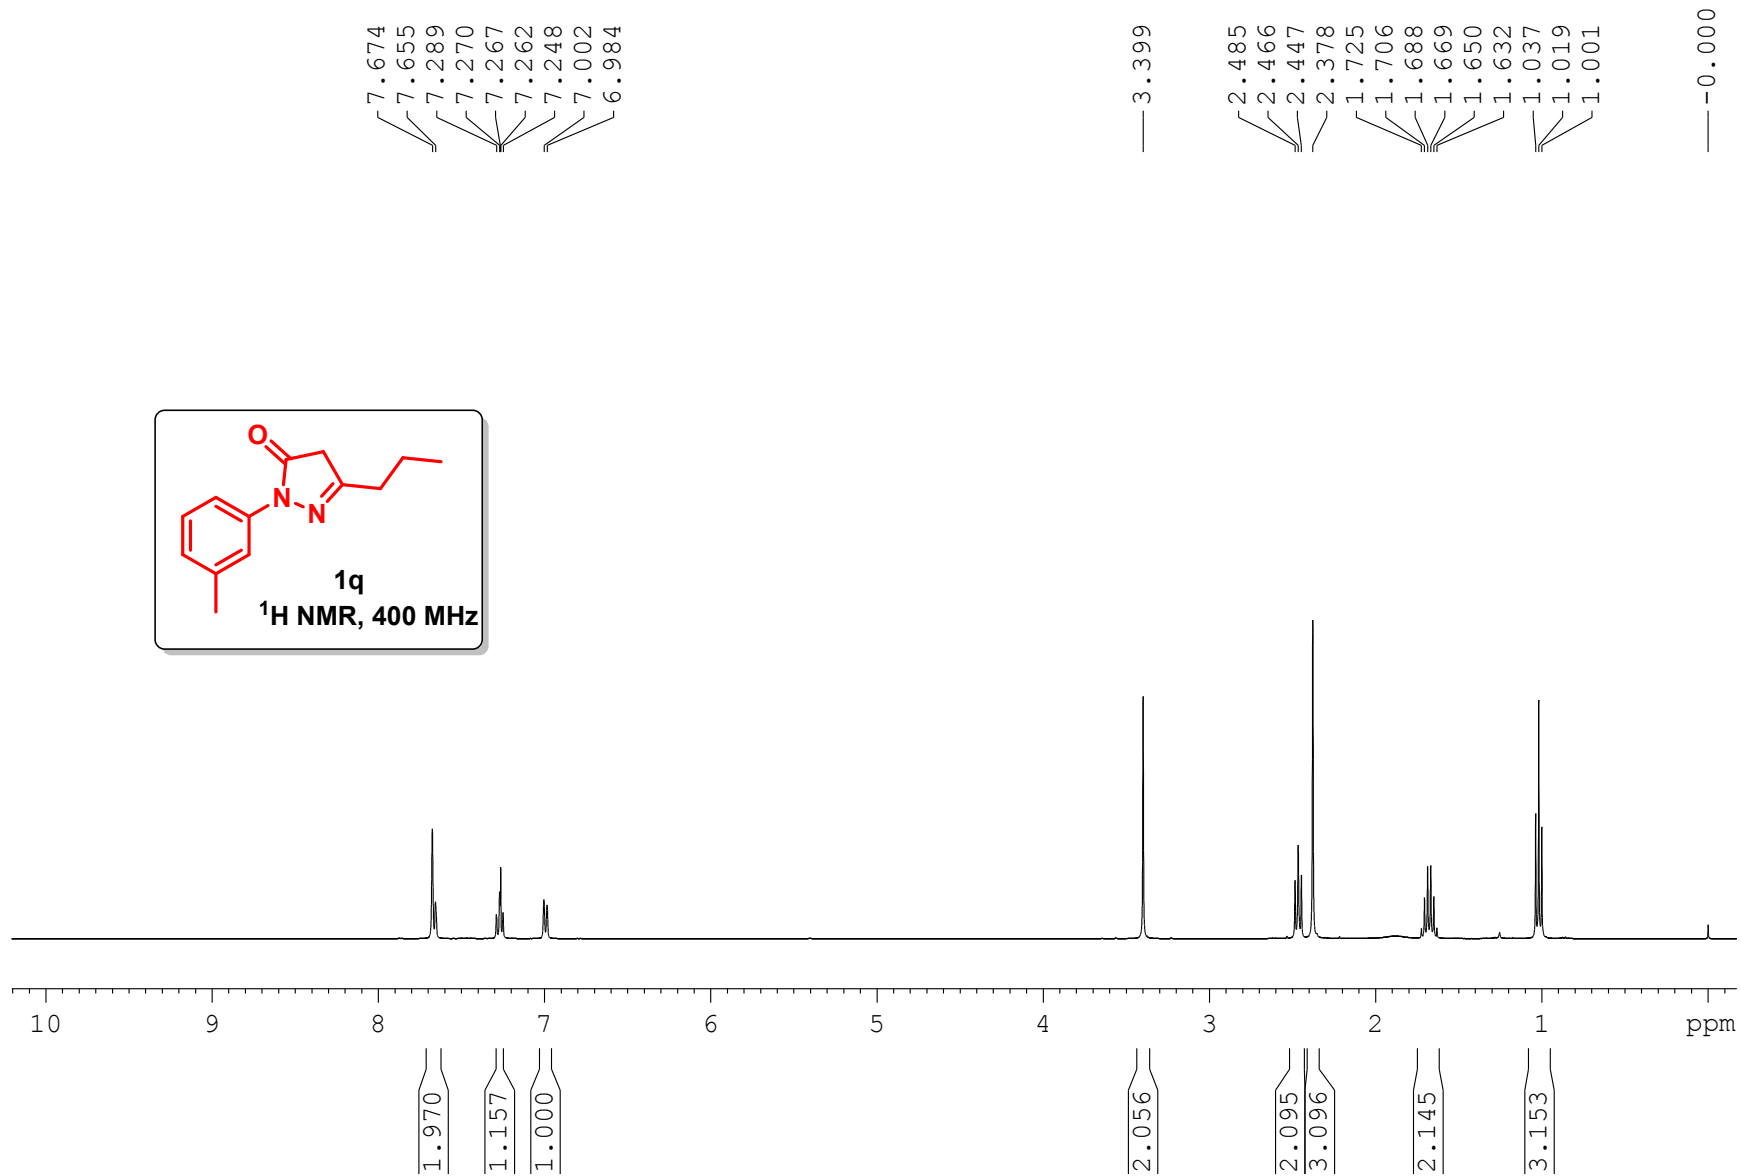

— 170.673

— 159.969

— 138.824  
— 138.108

— 128.742  
— 125.978

— 119.637  
— 116.276

— 77.474  
— 77.156  
— 76.839

— 41.820

— 33.234

— 21.697  
— 20.183

— 13.880

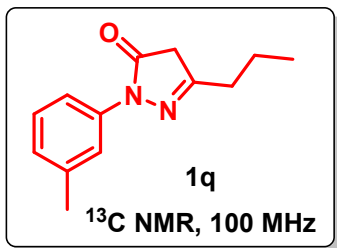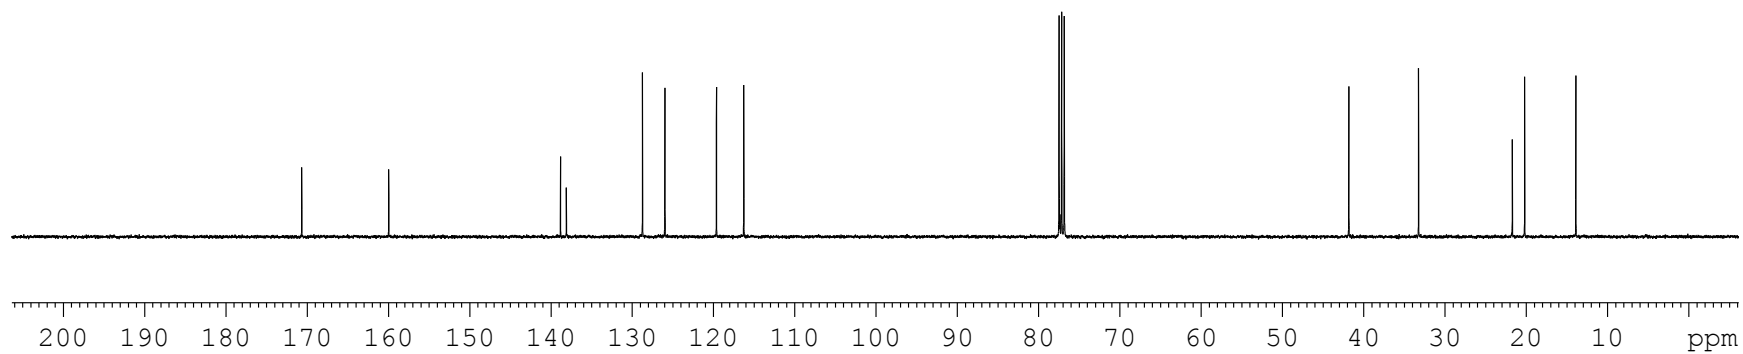

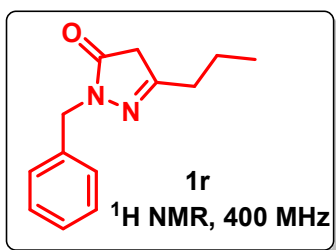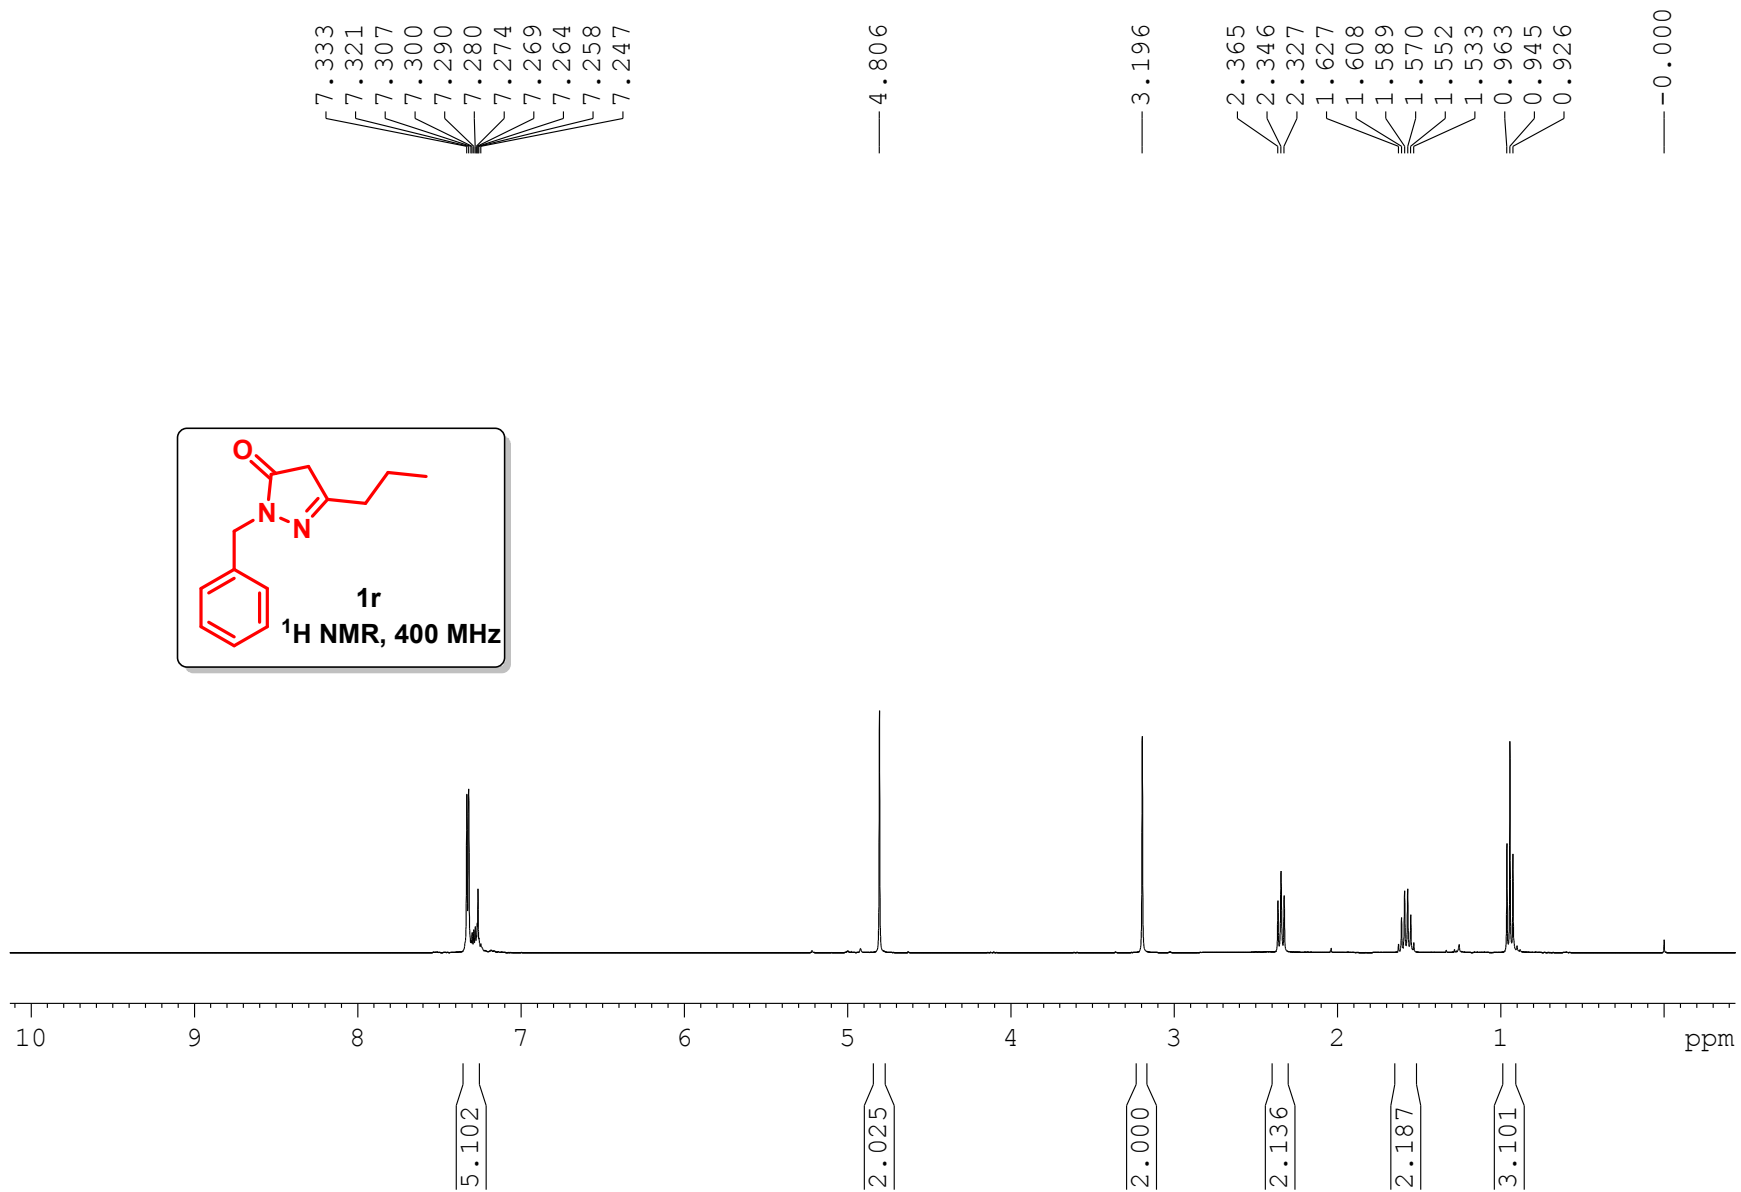

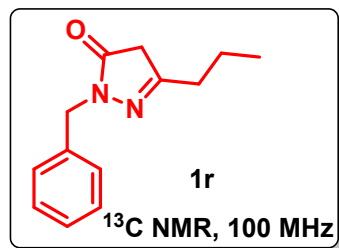

— 172.160

— 159.599

— 136.727

— 128.686

— 128.205

— 127.715

— 77.476

— 77.158

— 76.840

— 47.889

— 40.148

— 33.199

— 20.281

— 13.798

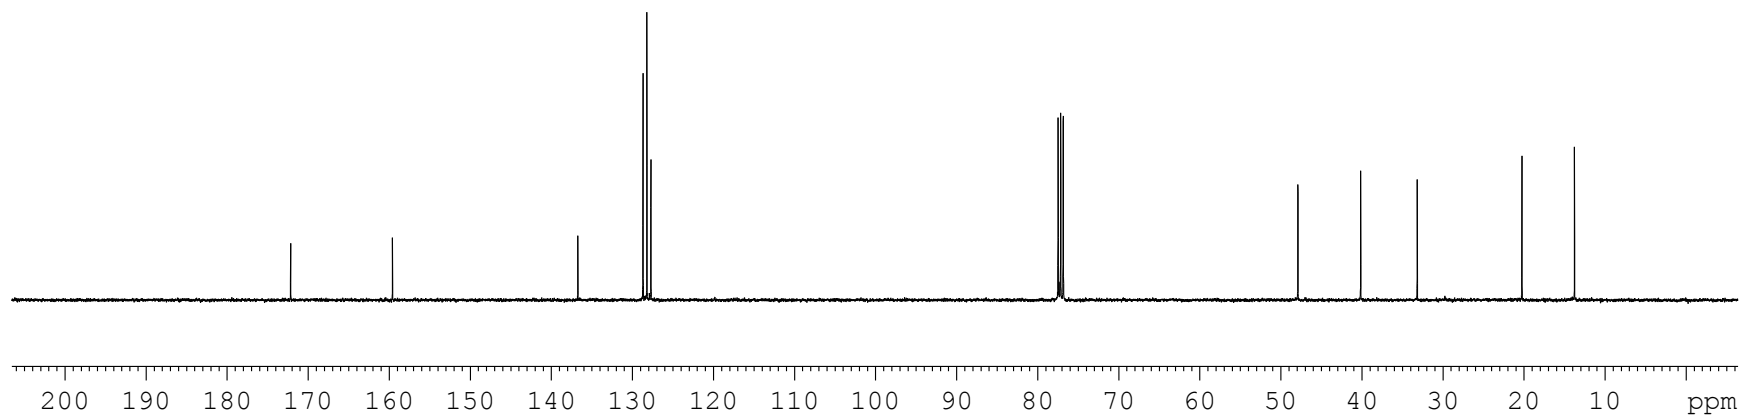

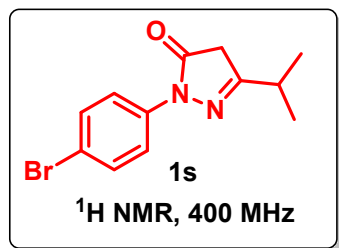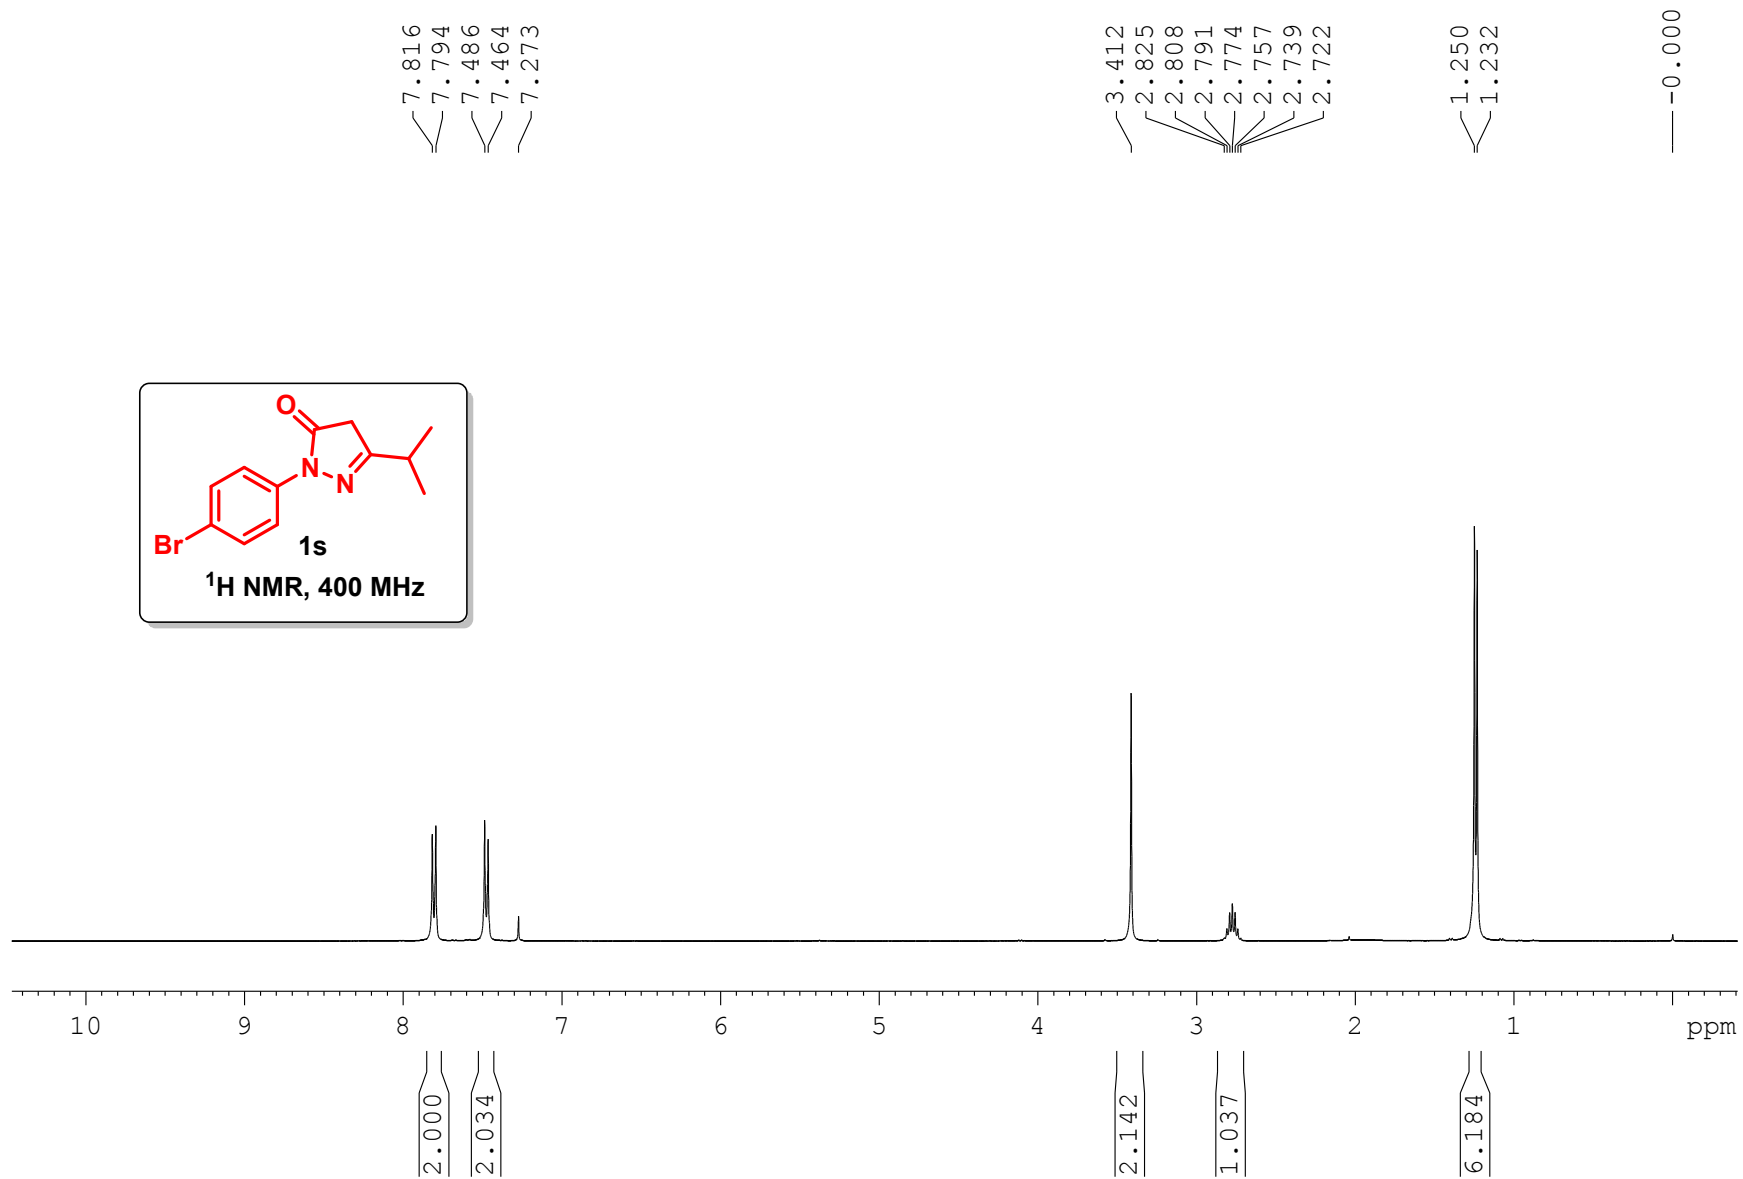

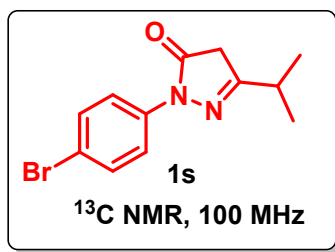

— 170.599  
 — 164.705

— 137.377  
 — 131.801

— 120.191  
 — 117.684

77.475  
 77.157  
 76.839

— 39.962

— 30.833

— 20.129

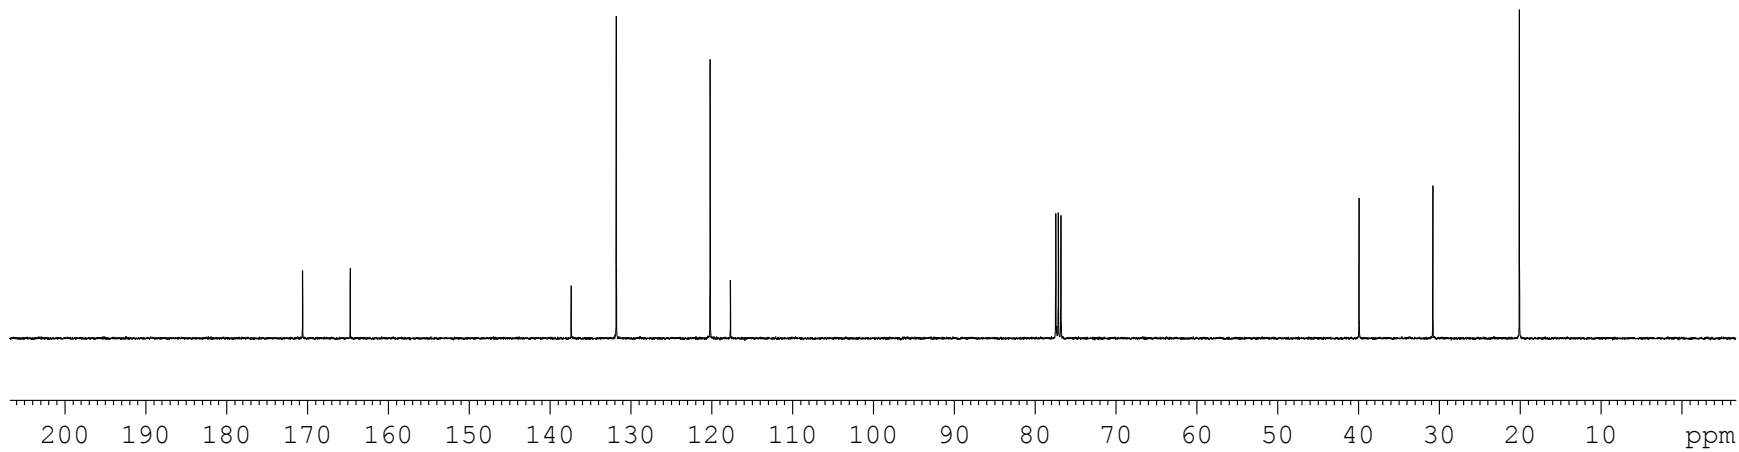



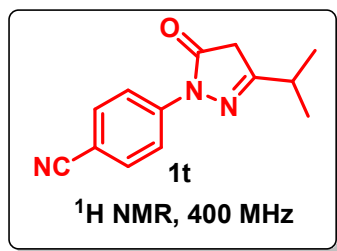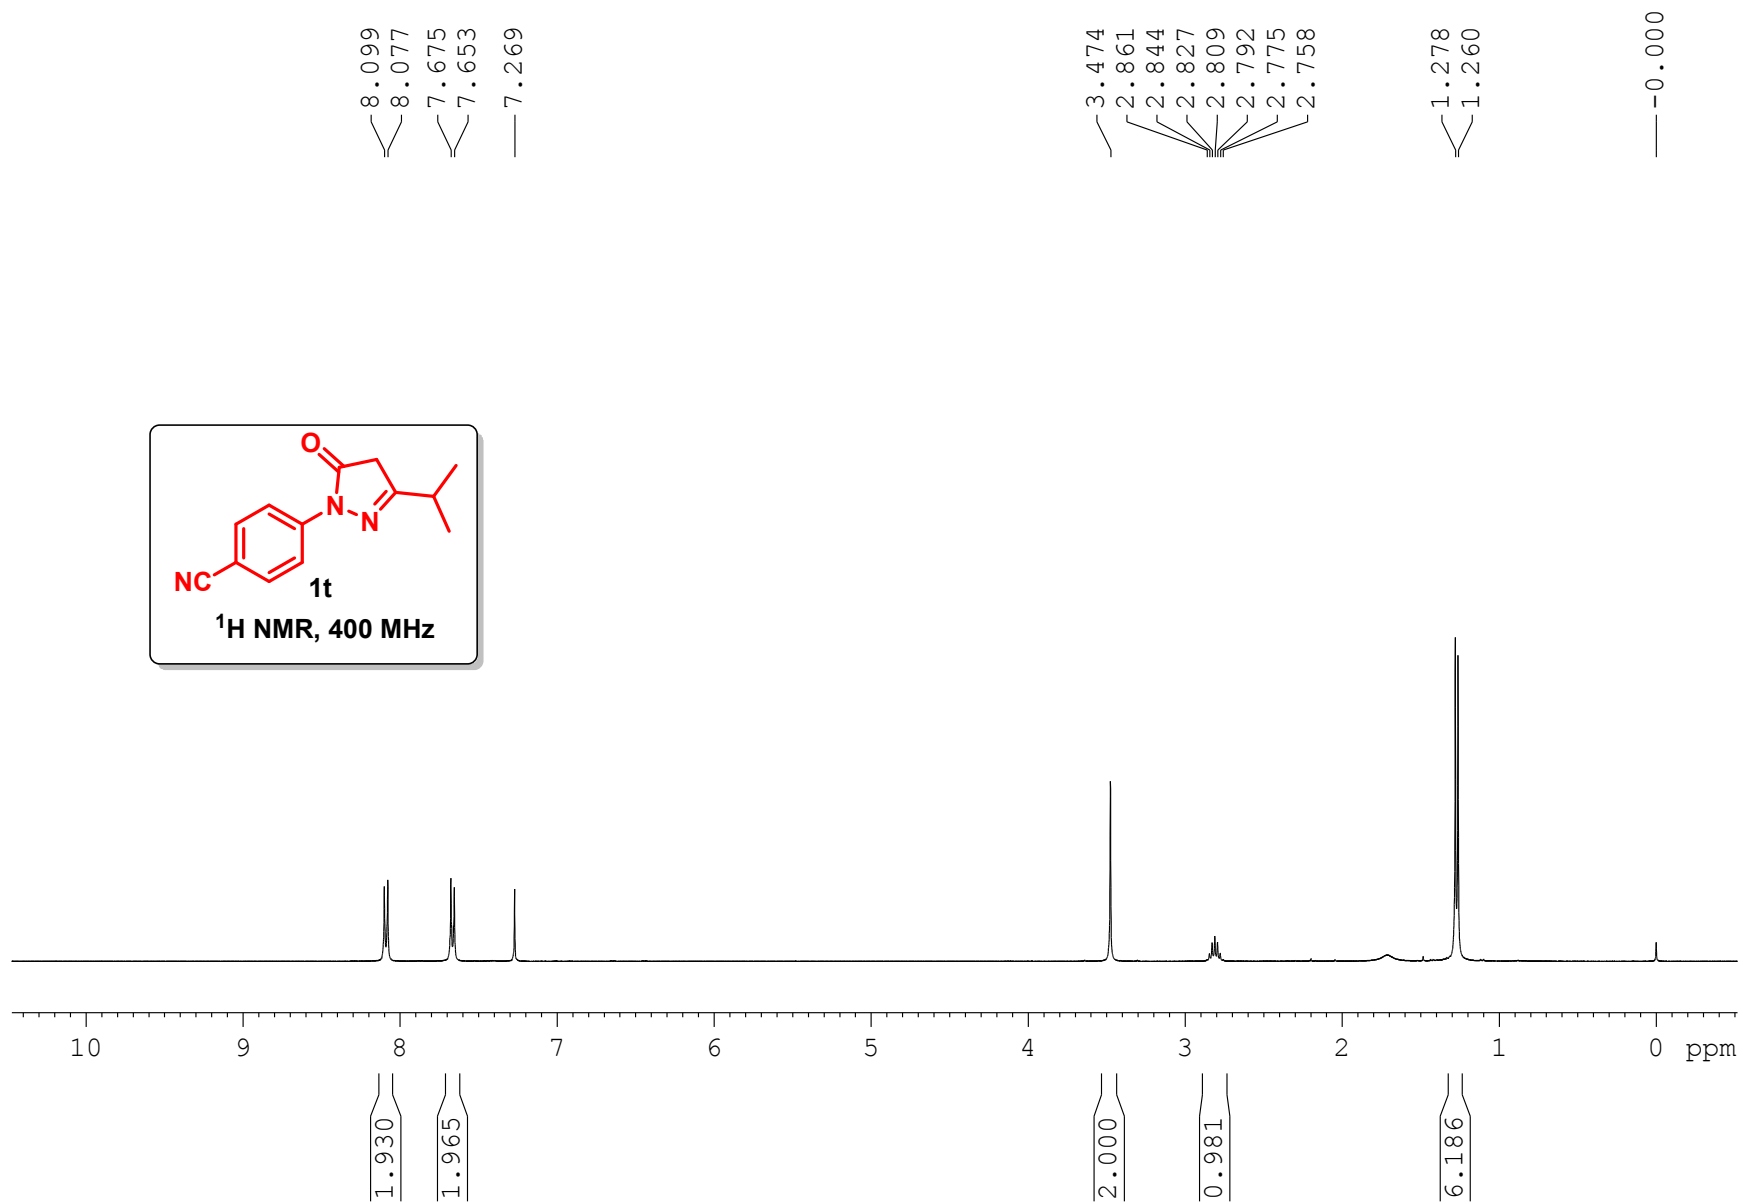

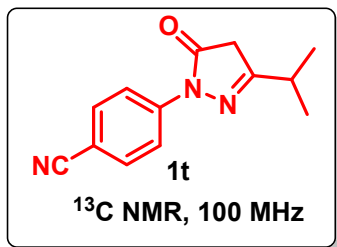

— 171.039  
 — 165.440

— 141.799  
 — 133.169

< 119.045  
 < 118.350

— 107.697

< 77.475  
 < 77.157  
 < 76.839

— 40.129

— 30.959

— 20.090

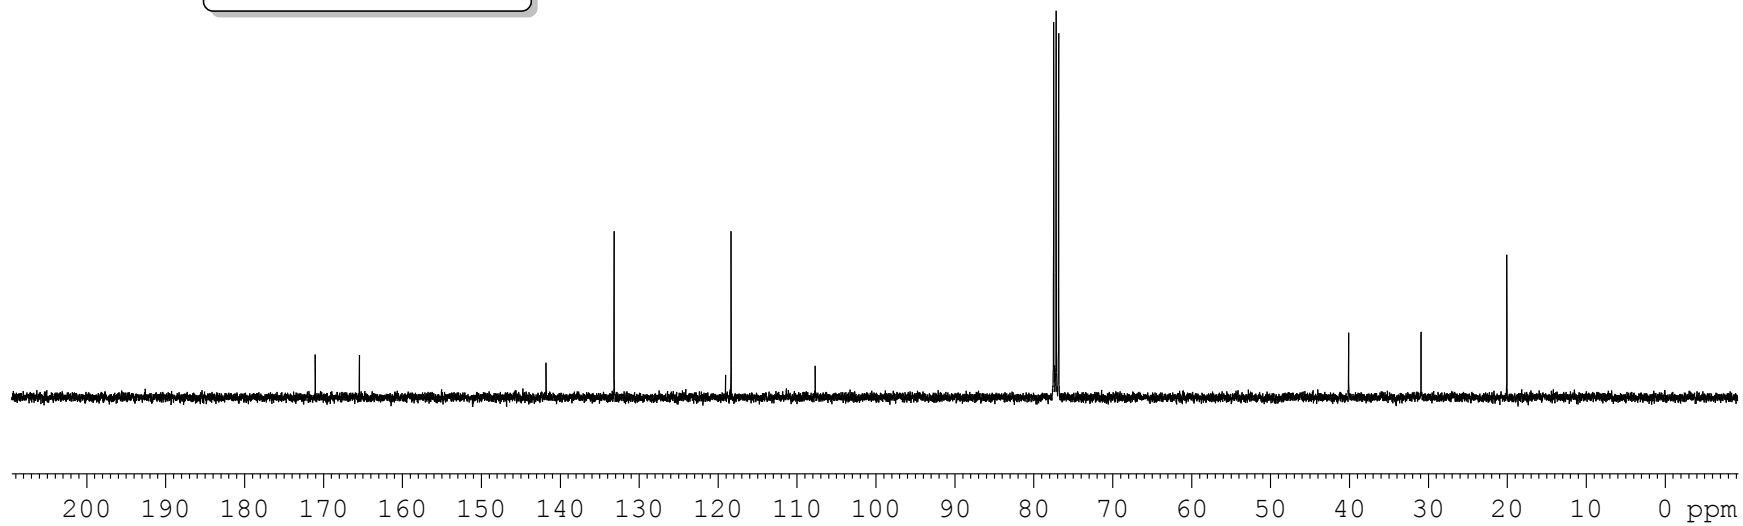

8.749  
8.333  
8.330  
8.312  
8.310  
8.002  
7.999  
7.997  
7.981  
7.978  
7.977  
7.554  
7.533  
7.512  
7.289

3.504  
2.884  
2.867  
2.850  
2.832  
2.815  
2.798  
2.781

1.292  
1.275

— 0.000

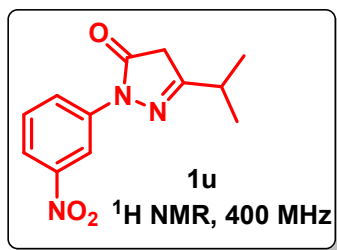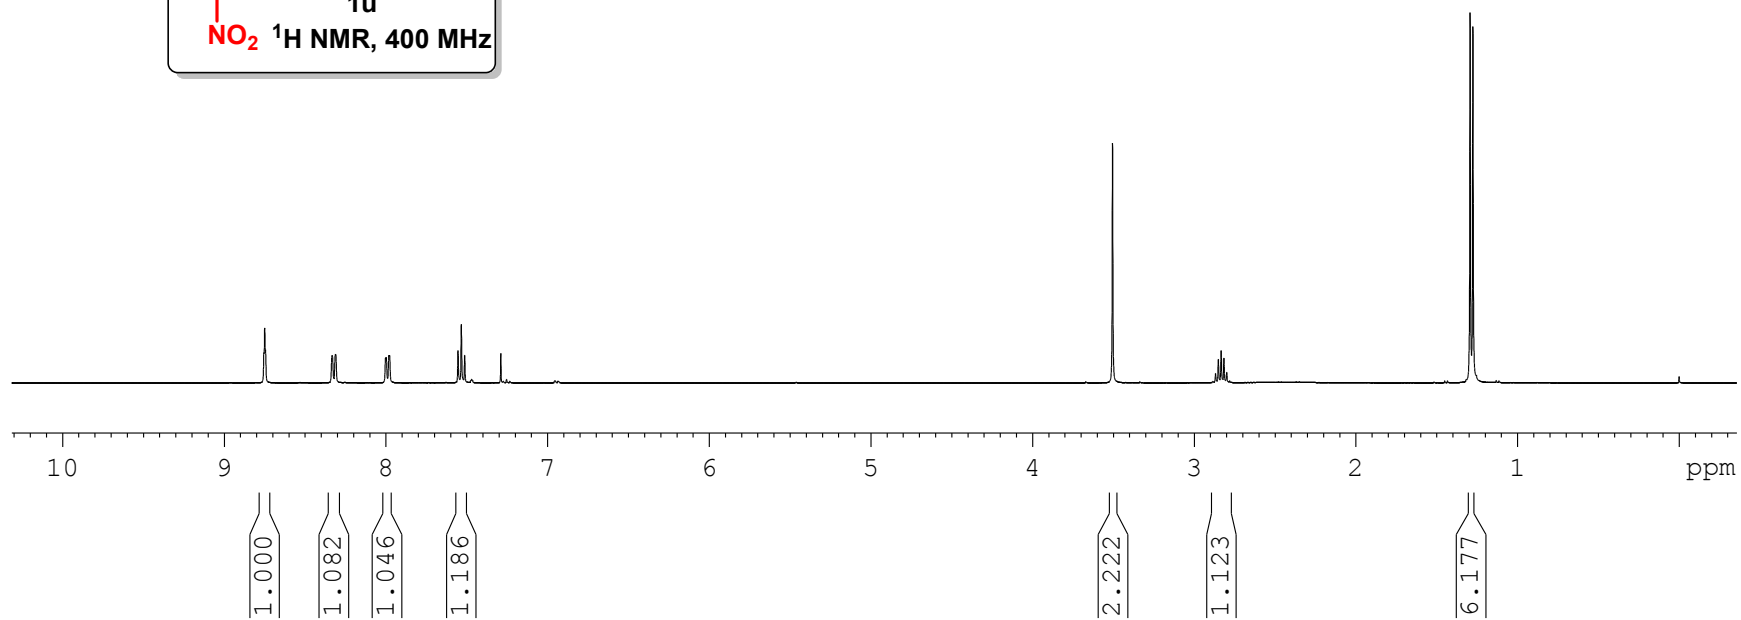

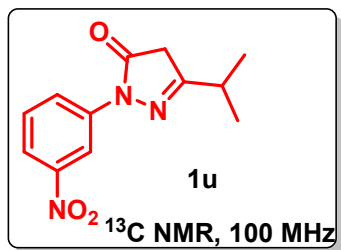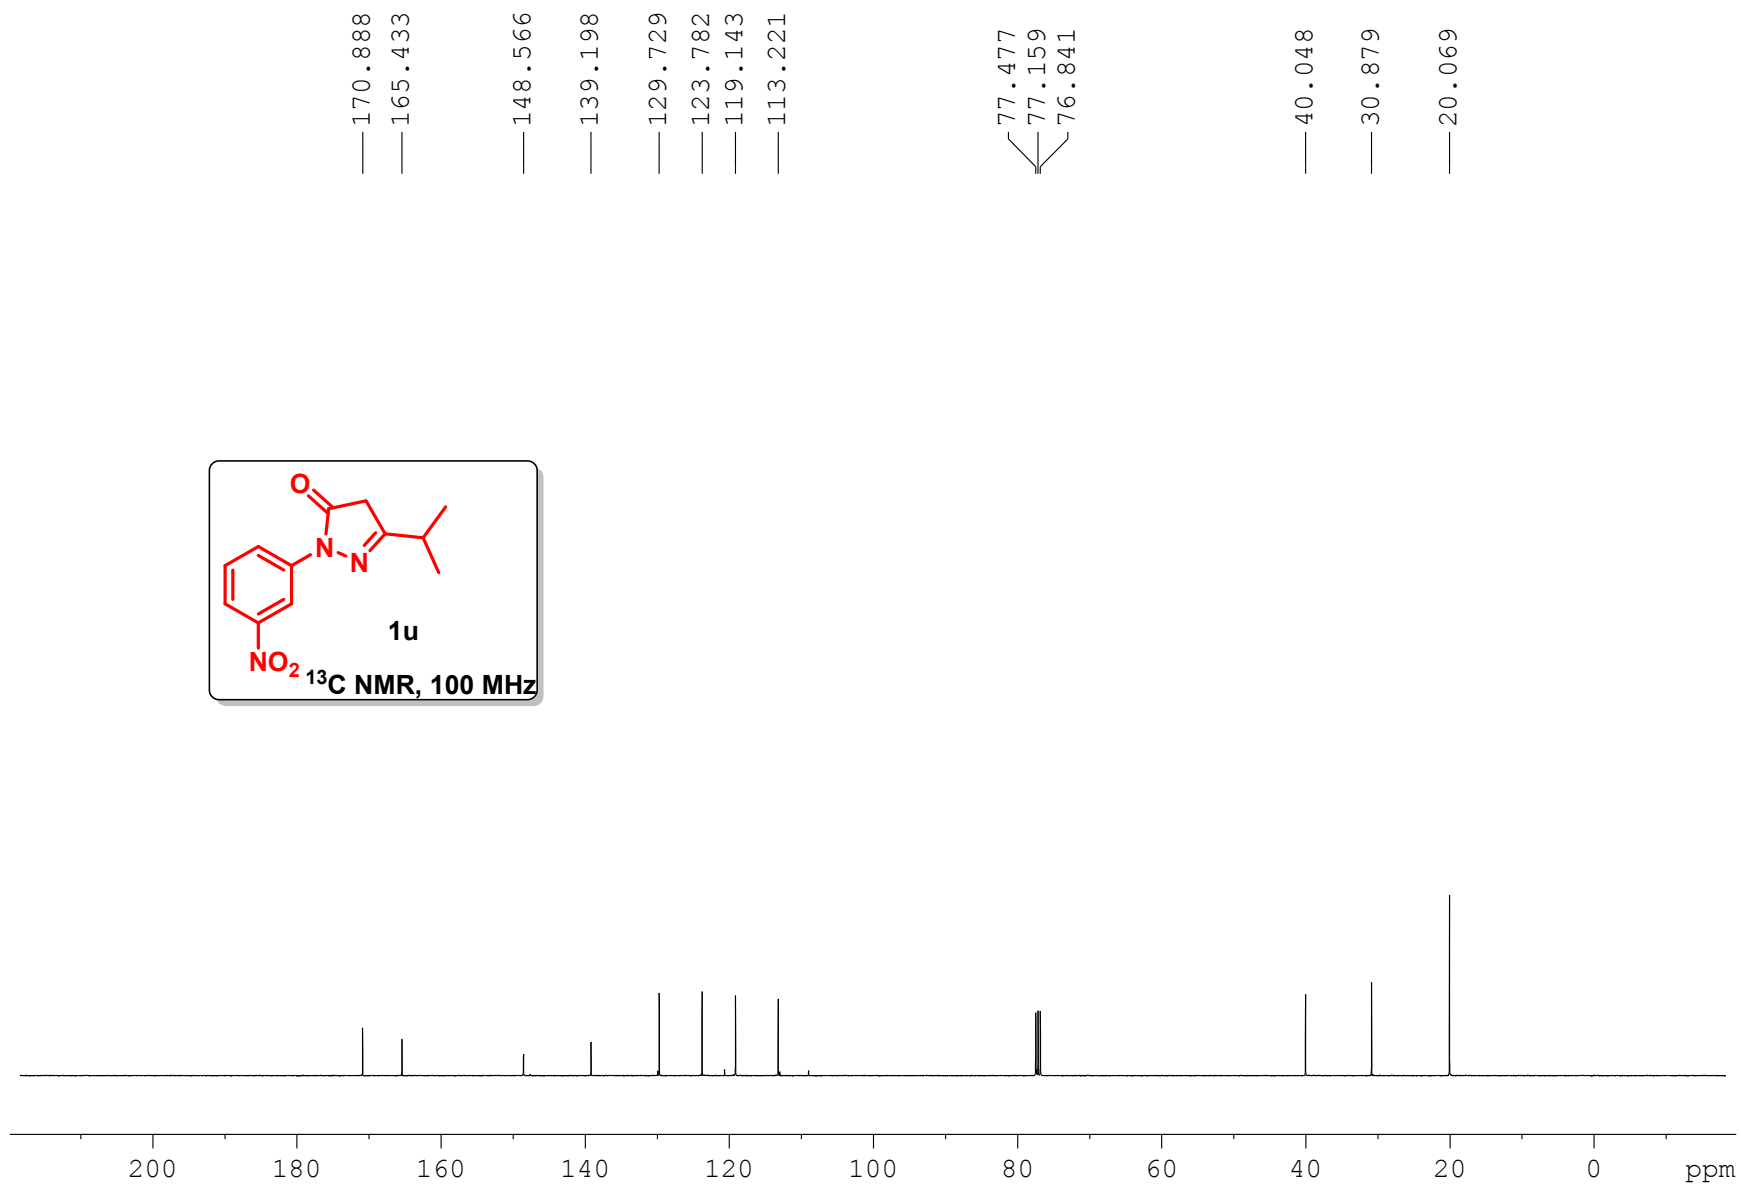

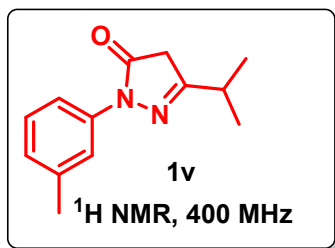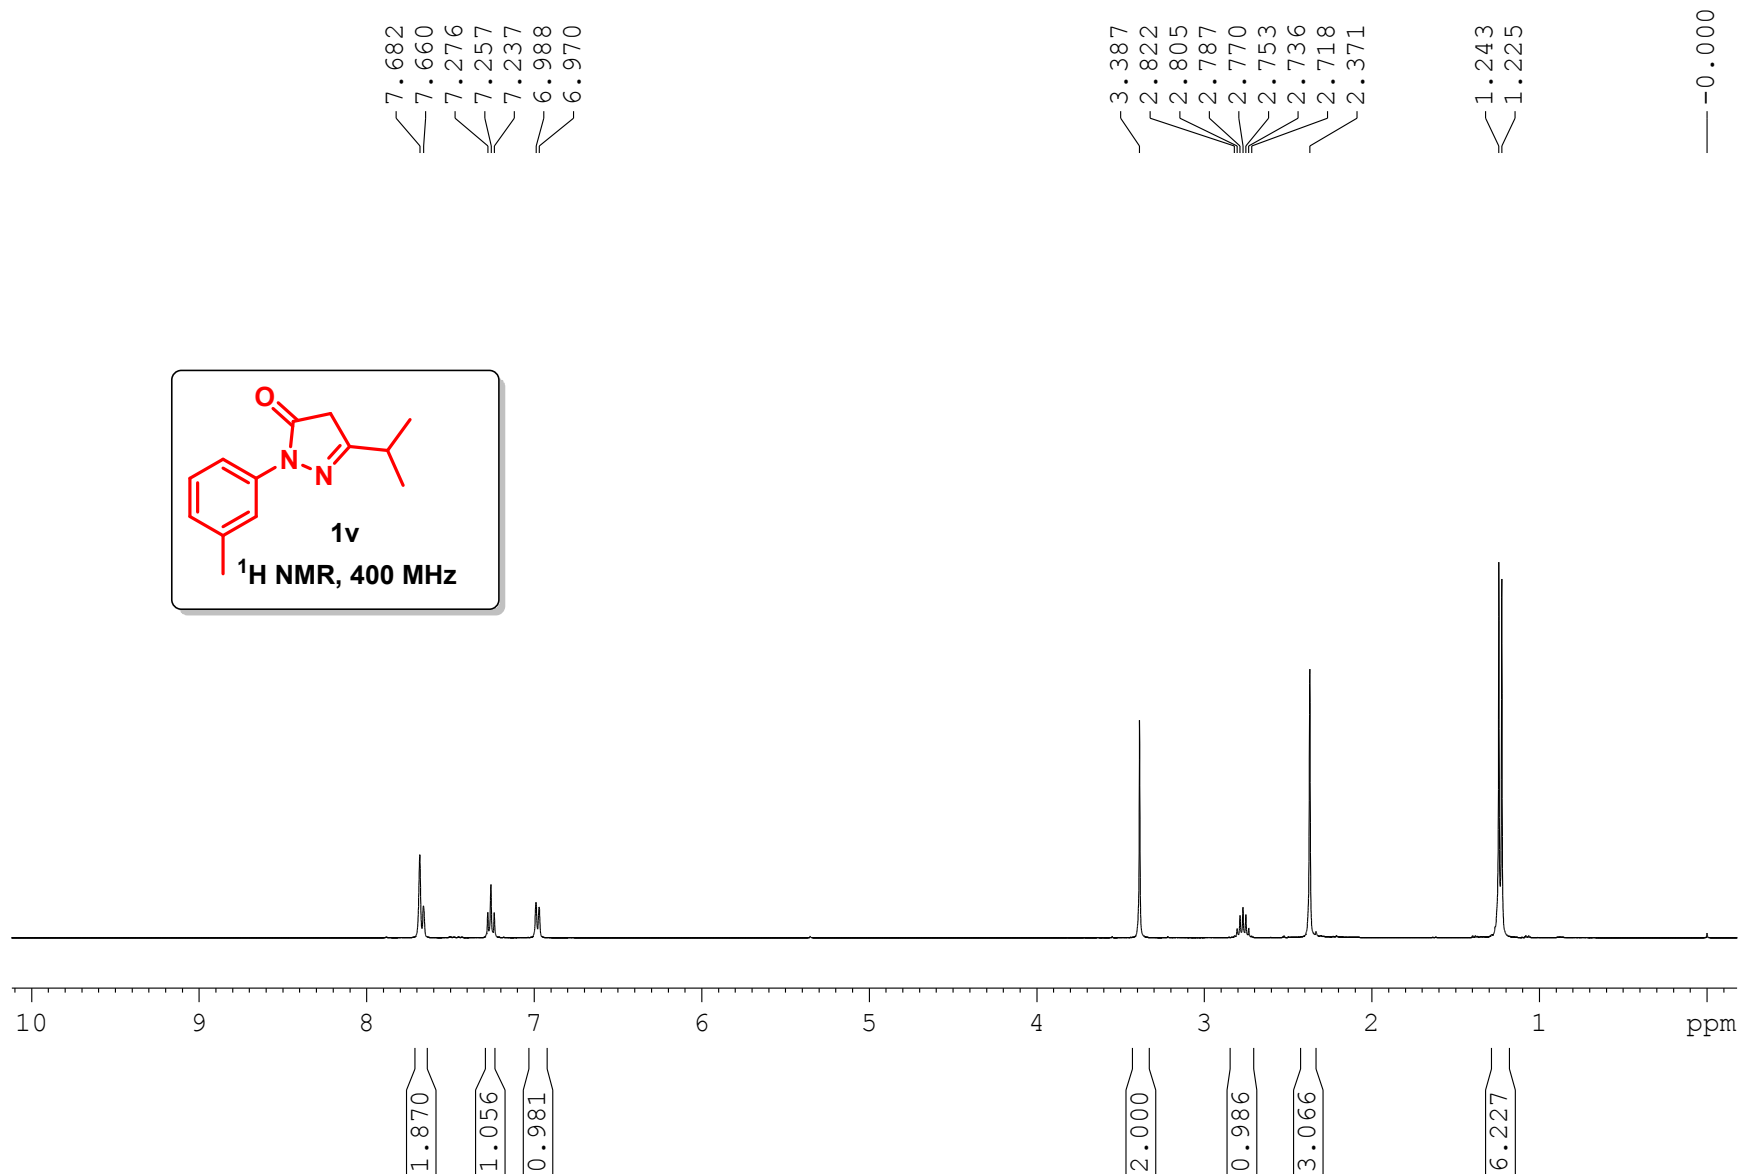

— 170.667  
— 164.297

— 138.716  
— 138.178  
— 128.664  
— 125.862  
— 119.552  
— 116.200

— 77.474  
— 77.156  
— 76.838

— 39.856  
— 30.797  
— 21.640  
— 20.186

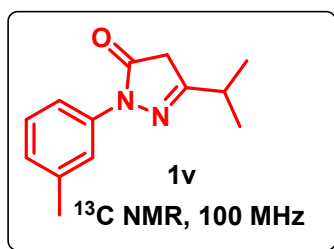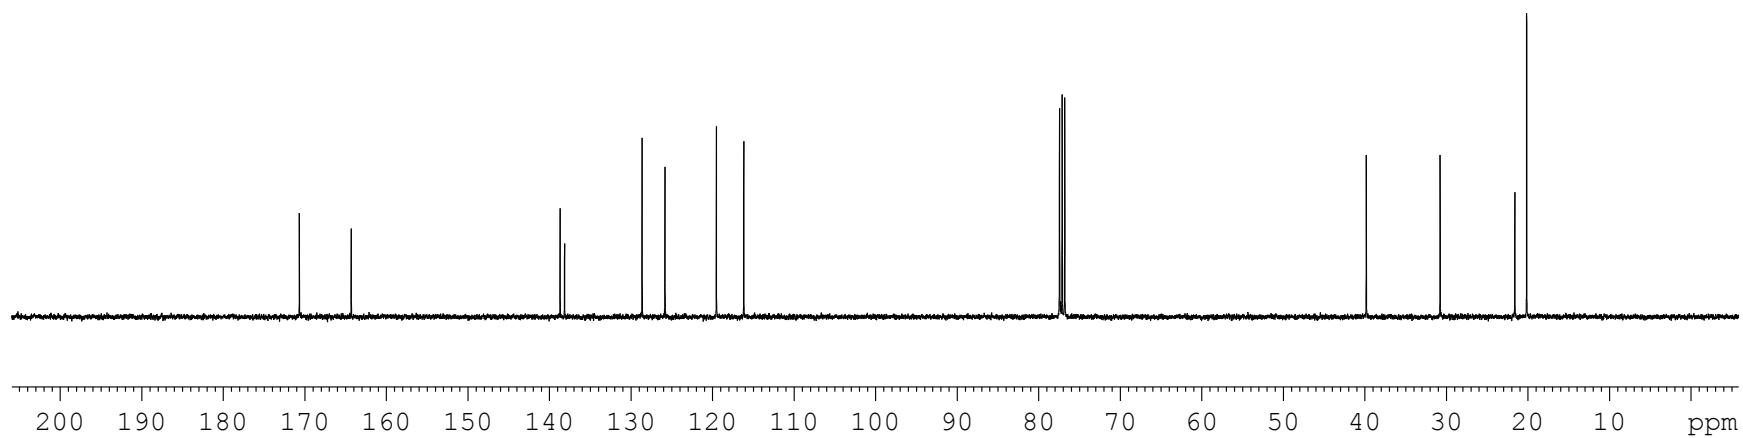

Supplement: d1ob00862e1.pdf [file d1ob00862e1.pdf]
