# Supplementary material for: N-Triflination of pyrazolones: a new method for N–S bond formation
Source: Royal Society of Chemistry journal article supplement (doi:10.1039/d1ob00862e), 2021-01-01

NM06-382 A

NM06-382 A 30 (0.589) AM2 (Ar,22000.0,556.28,0.00,LS 3)

1: TOF MS ES+  
1.95e6

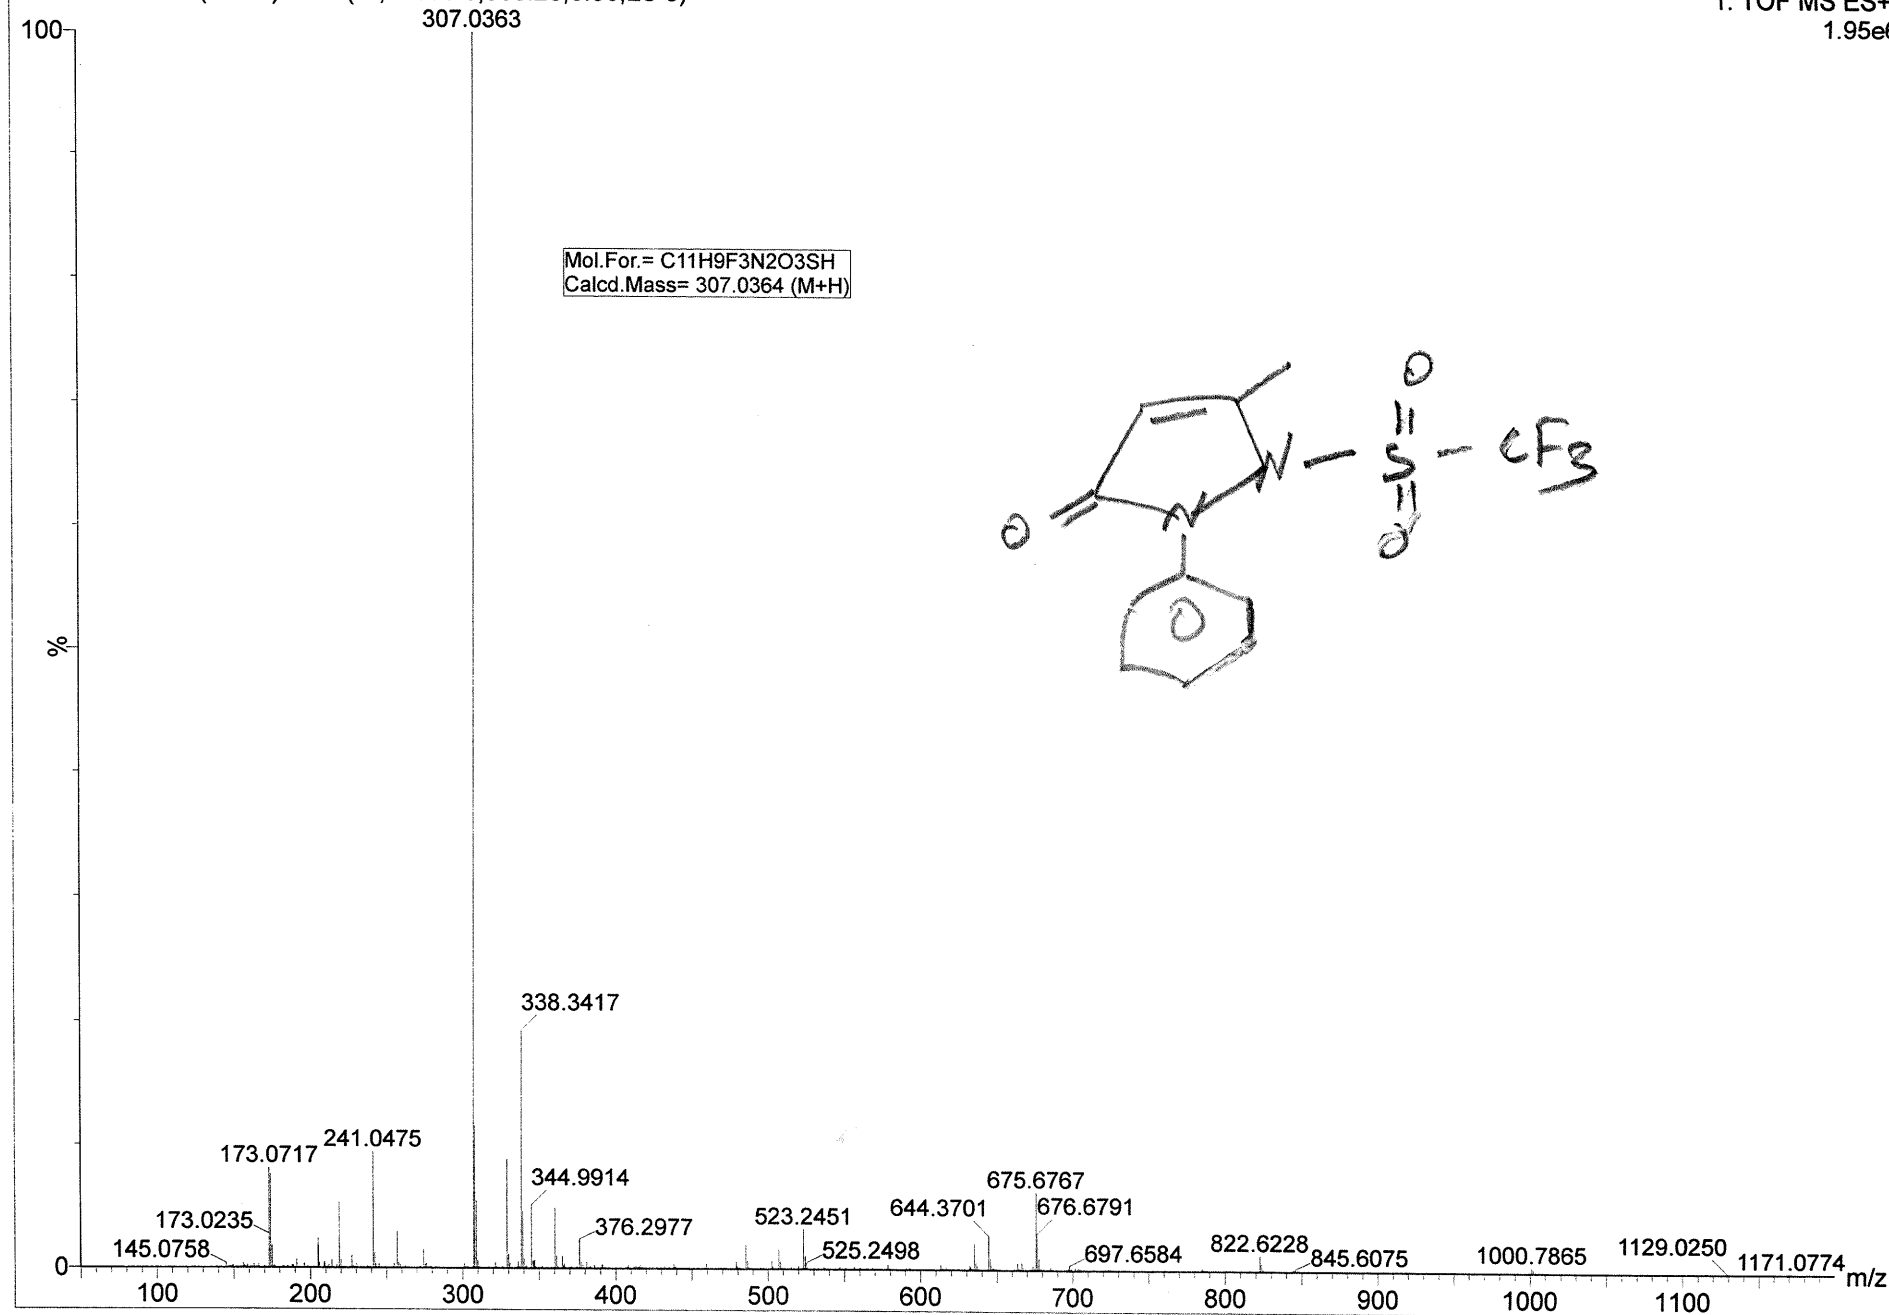

AP-NM-200

27102020\_21 74 (0.691) AM2 (Ar,22000.0,556.28,0.00,LS 3); Cm (74-(1:39+218:436))

IISc Organic Chemistry

27-Oct-2020

1: TOF MS ES+

1.27e5

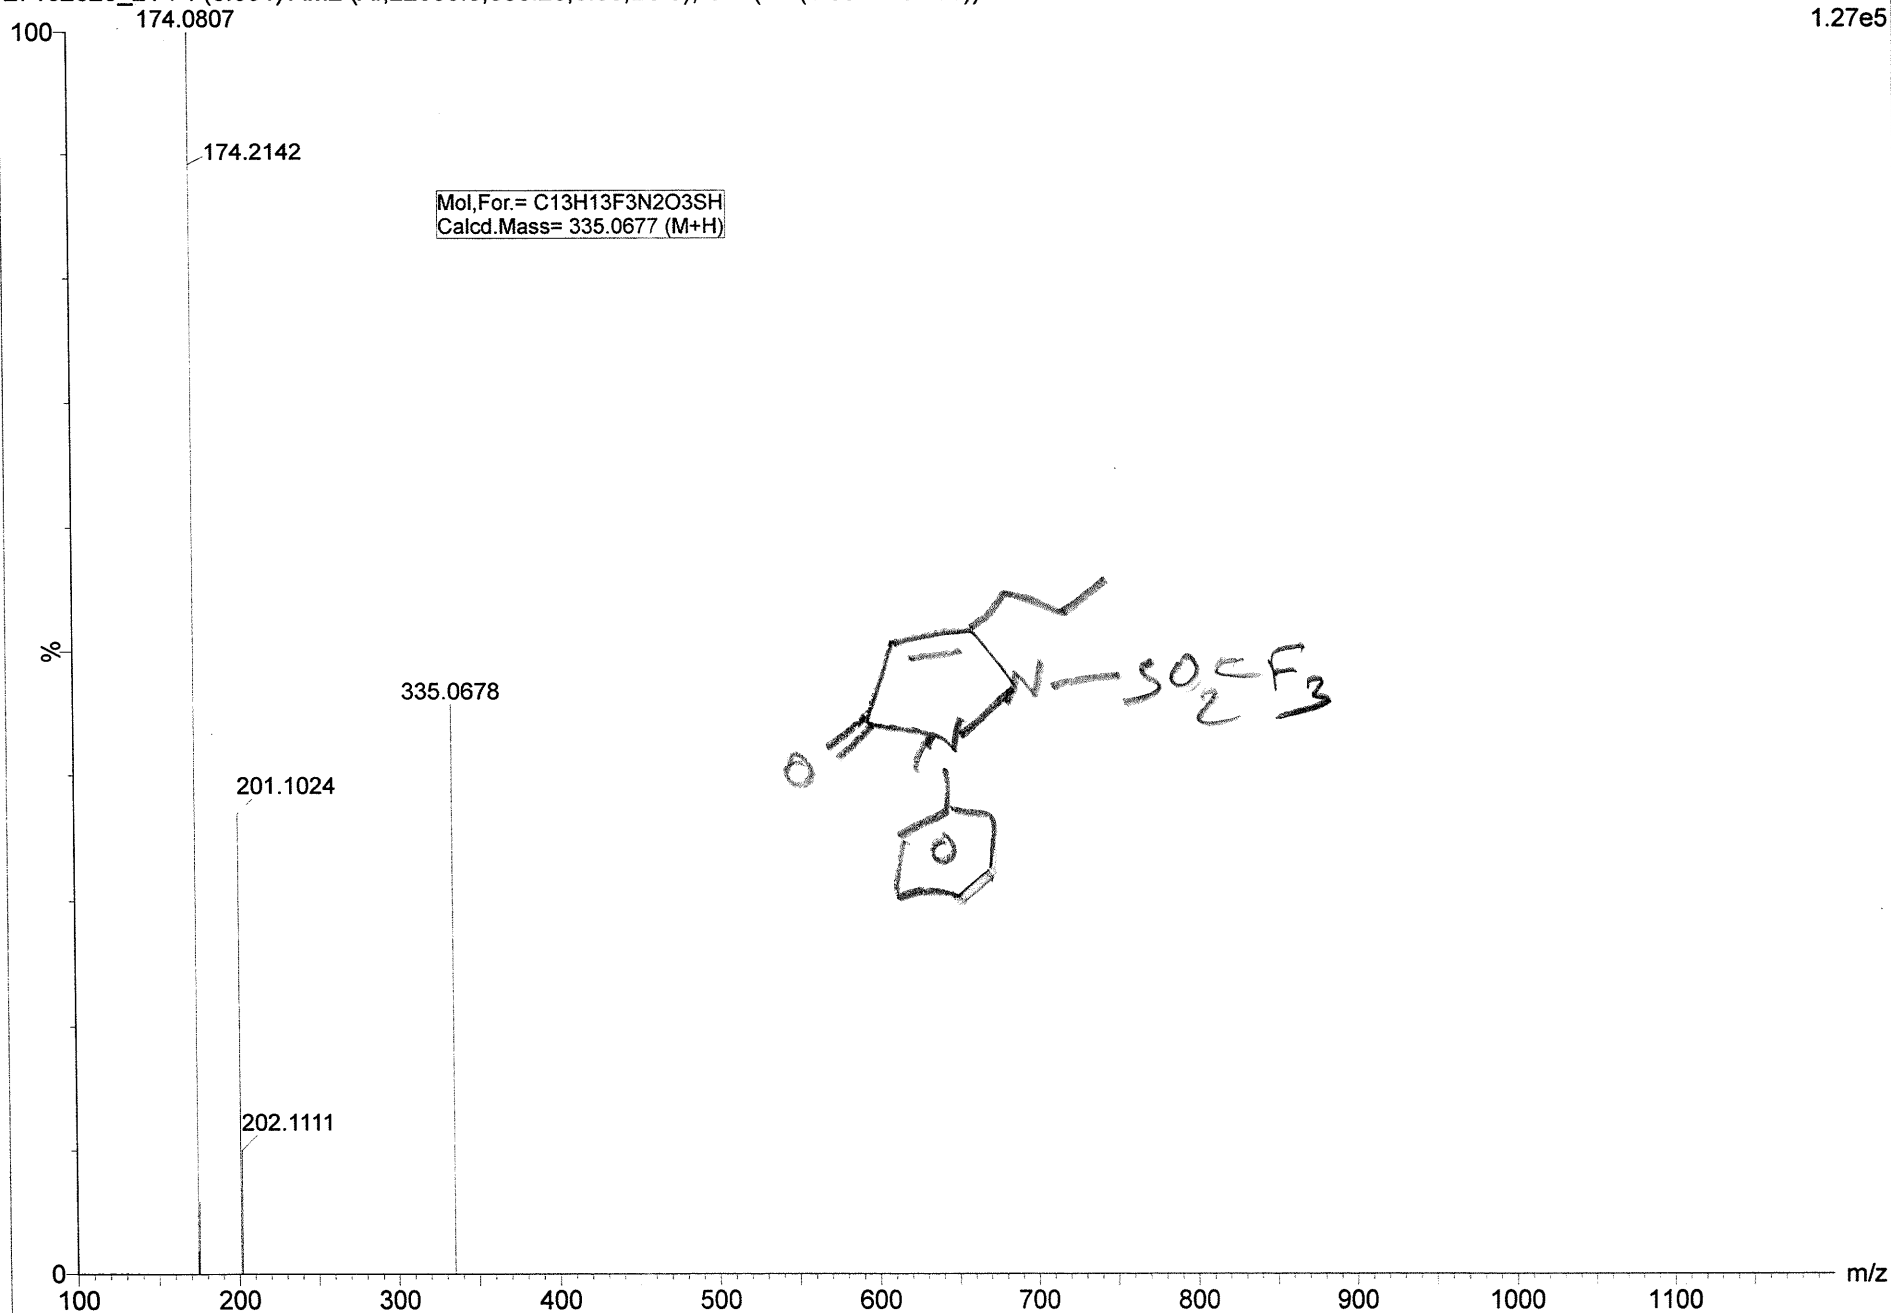

AP-NM-21

15102020\_20 62 (0.588) AM2 (Ar,22000.0,556.28,0.00,LS 3); Cm (62-(1:37+107:298))

IISc Organic Chemistry

15-Oct-2020

1: TOF MS ES+

6.84e5

100

201.1032

Mol. For= C<sub>13</sub>H<sub>13</sub>F<sub>3</sub>N<sub>2</sub>O<sub>3</sub>SH  
Calcd. Mass=335.0677(M+H)

335.0674

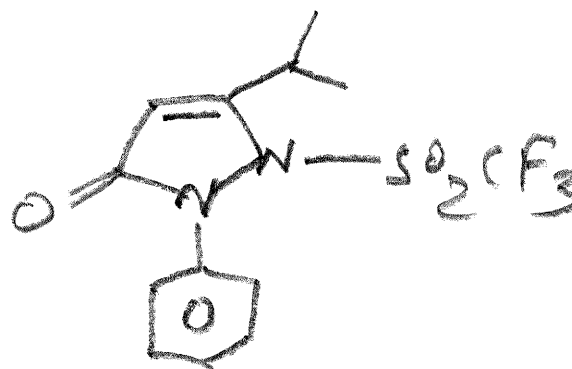

%

162.9745

202.1087

343.0437

345.0418

100.0579

208.3502

357.0464

593.2762

1184.7435  
m/z

100

200

300

400

500

600

700

800

900

1000

1100

AP-NM-25

IISc Organic Chemistry

27-Oct-2020

27102020\_20 81 (0.771) AM2 (Ar,22000.0,556.28,0.00,LS 3); Cm (81-(1:37+206:436))

1: TOF MS ES+  
7.89e6

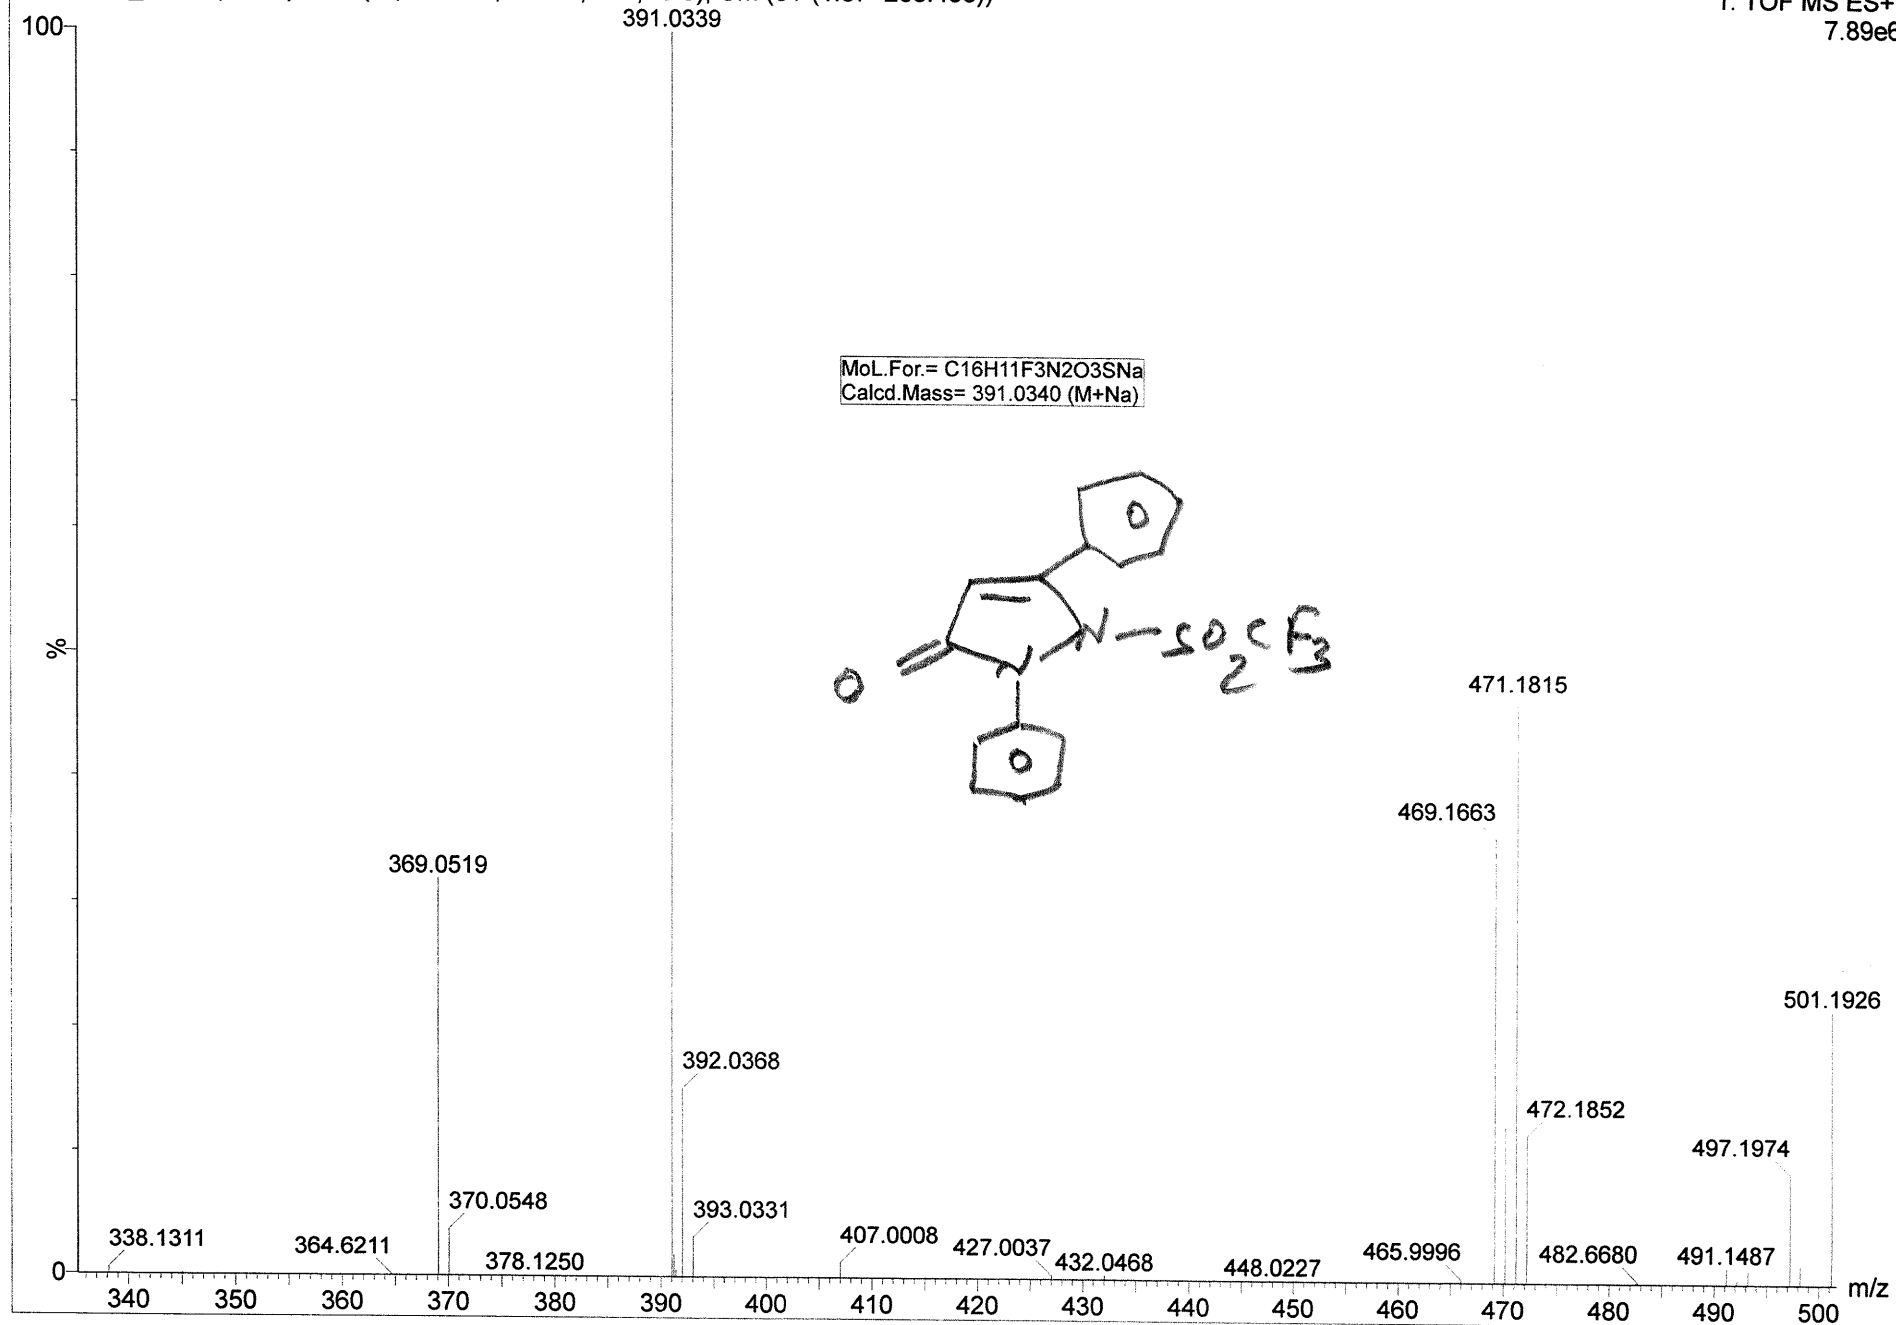

AP-NM-19

IISc Organic Chemistry

07-Oct-2020

07102020\_02 73 (0.682) AM2 (Ar,22000.0,556.28,0.00,LS 3); Cm (73-(1:38+160:418))

1: TOF MS ES+

3.46e6

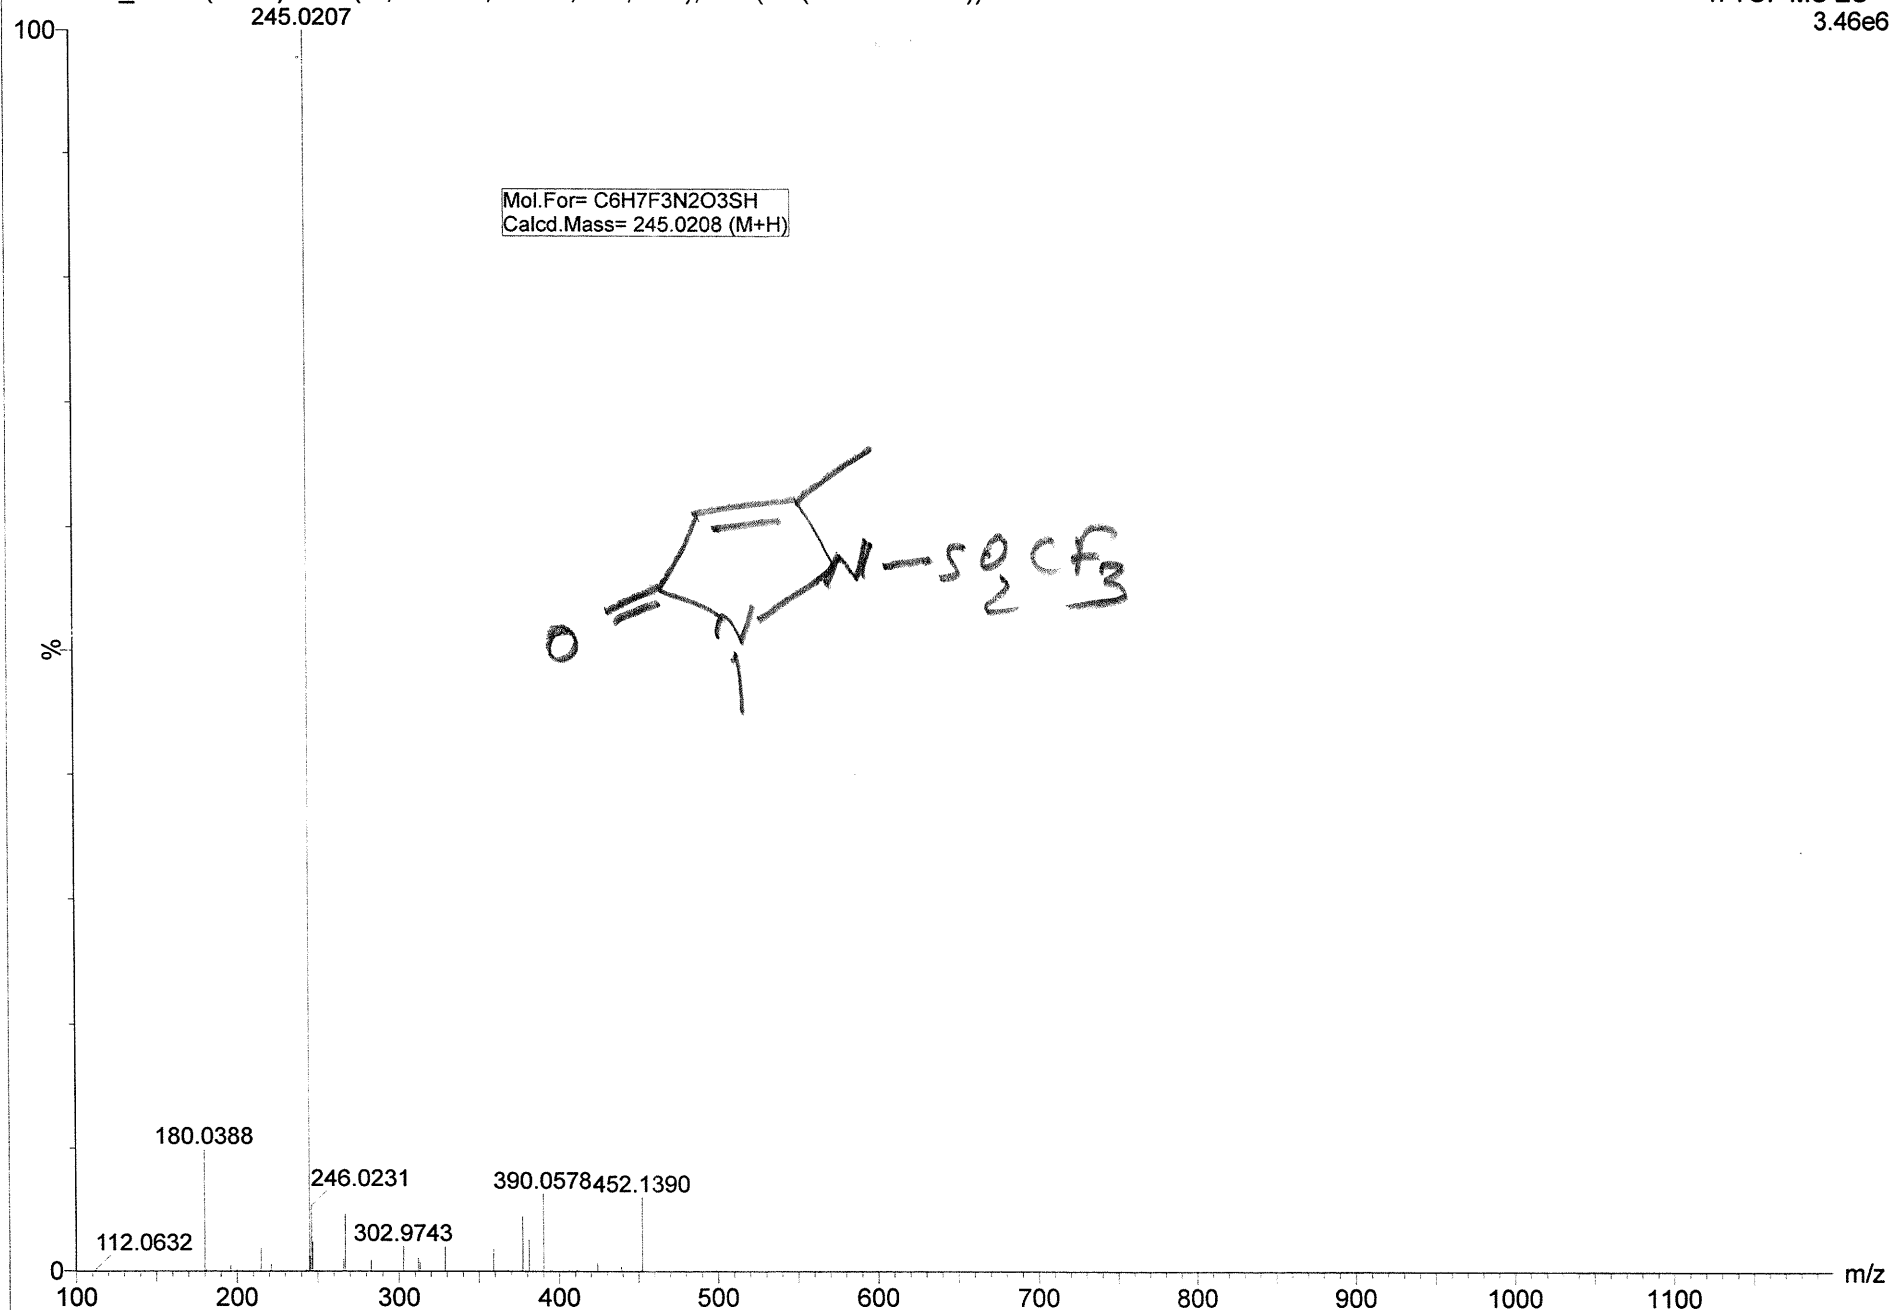

AP-NM-13

IISc Organic Chemistry

06-Oct-2020

06102020\_38 64 (0.605) AM2 (Ar,22000.0,556.28,0.00,LS 3); Cm (64-(1:11+195:220))

1: TOF MS ES+  
444.8985 1.71e5

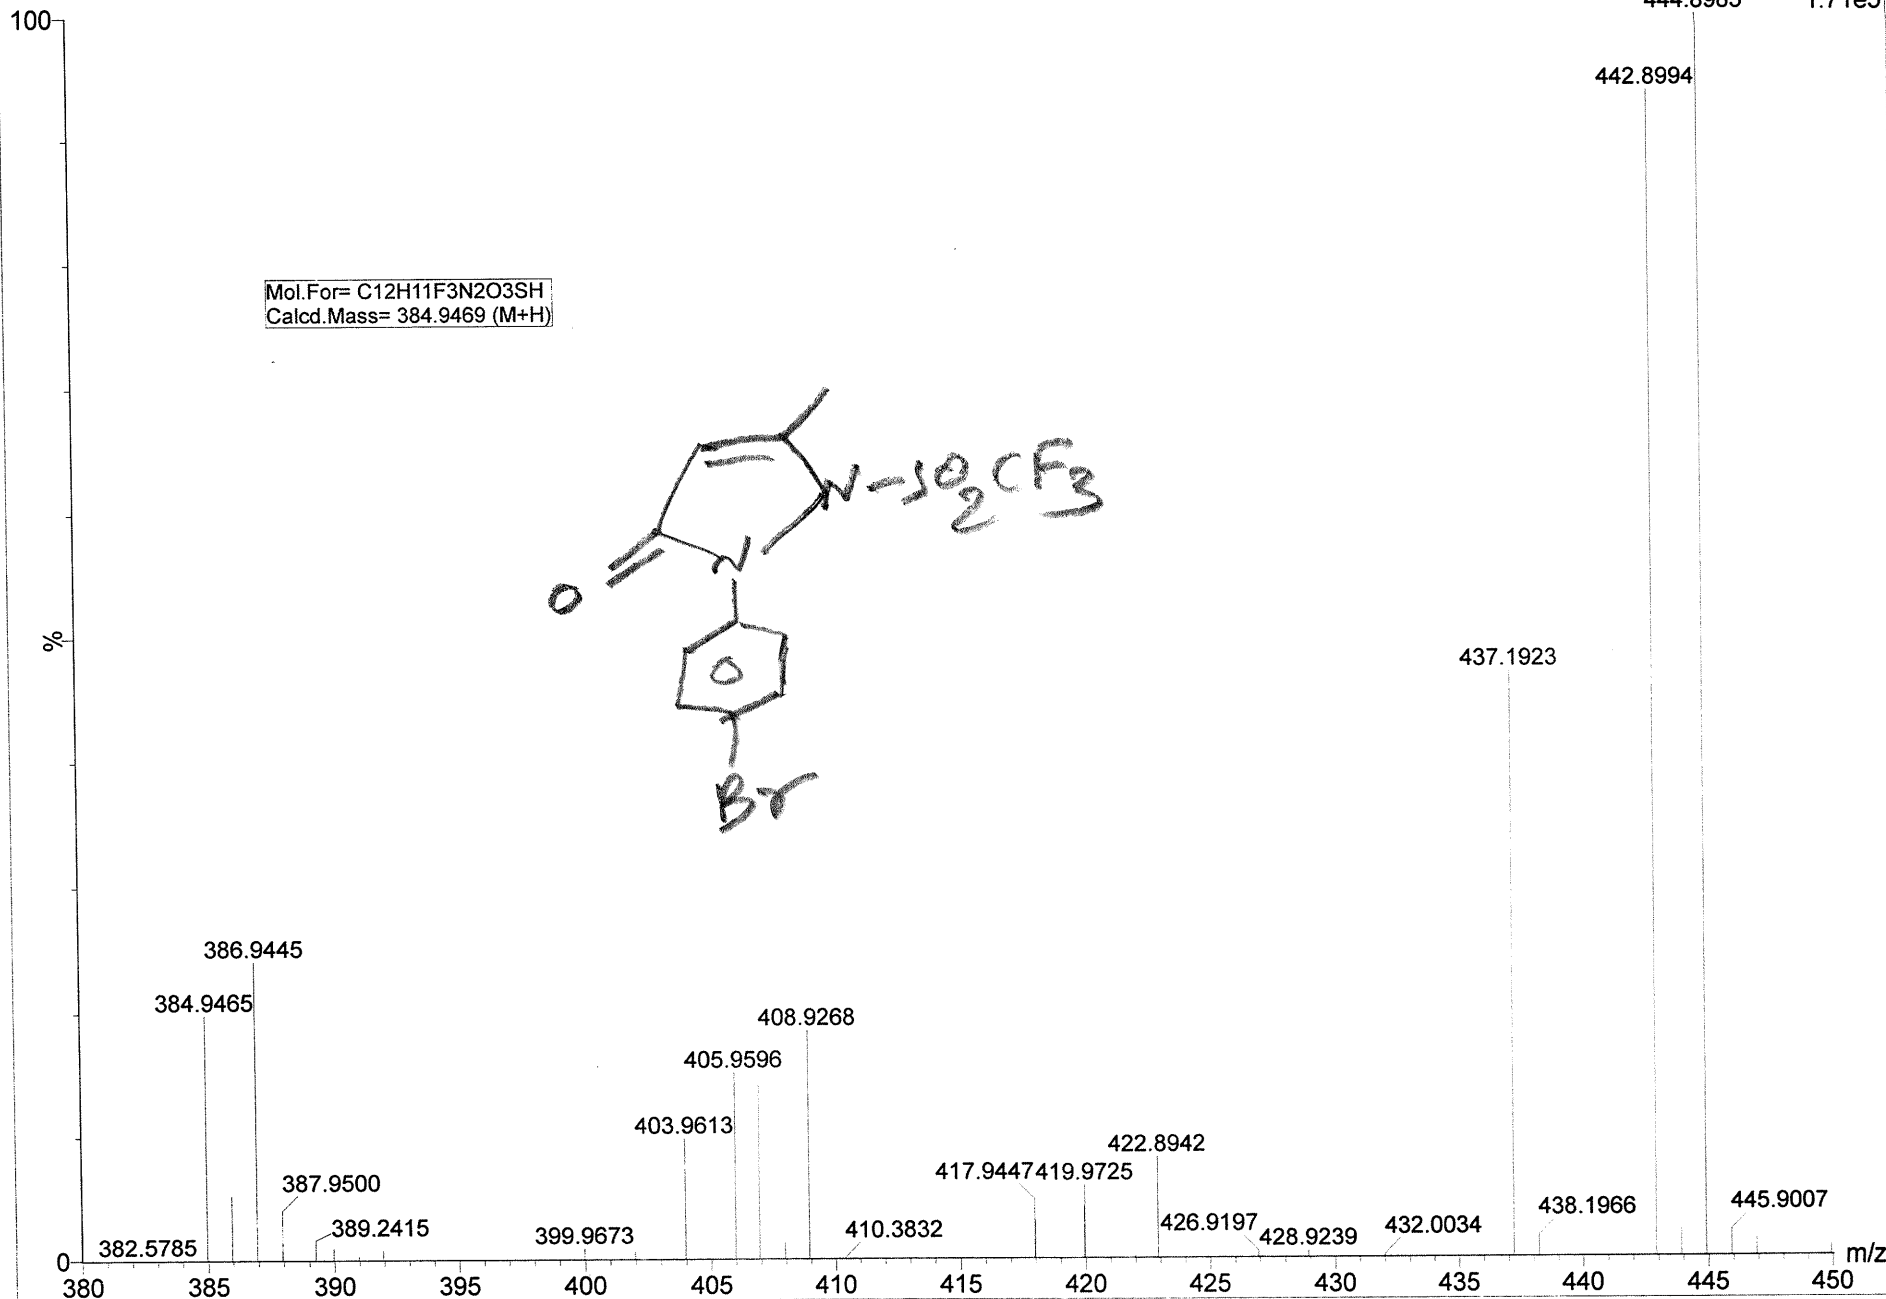

AP-NM-16

IISc Organic Chemistry

06-Oct-2020

06102020\_41 65 (0.614) AM2 (Ar,22000.0,556.28,0.00,LS 3); Cm (65-(1:10+213:242))

1: TOF MS ES+  
4.67e5

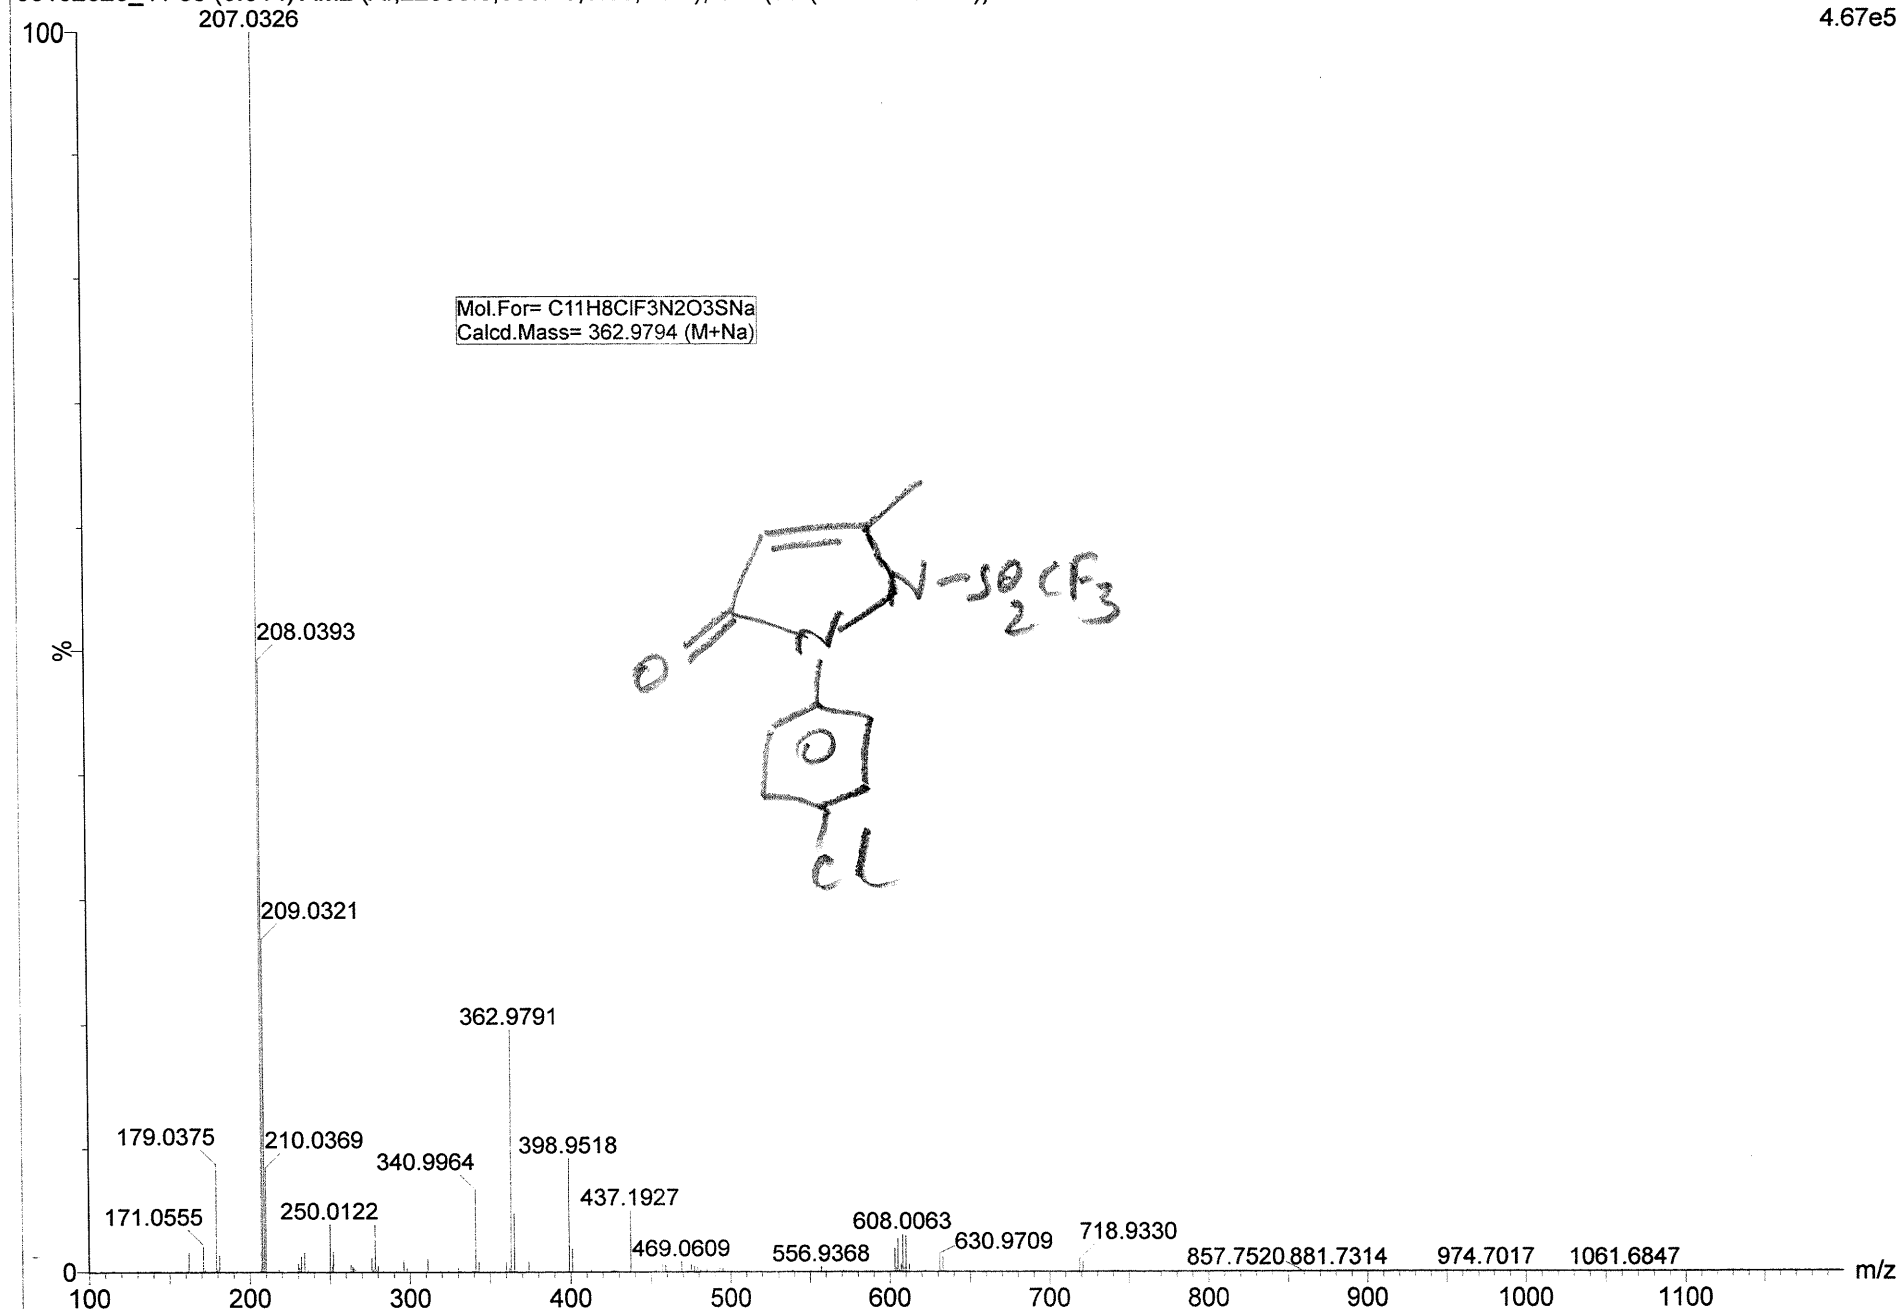

AP-NM-18

IISc Organic Chemistry

07-Oct-2020

07102020\_01 94 (0.882) AM2 (Ar,22000.0,556.28,0.00,LS 3); Cm (94-(1:41+245:436))

1: TOF MS ES+  
2.65e6

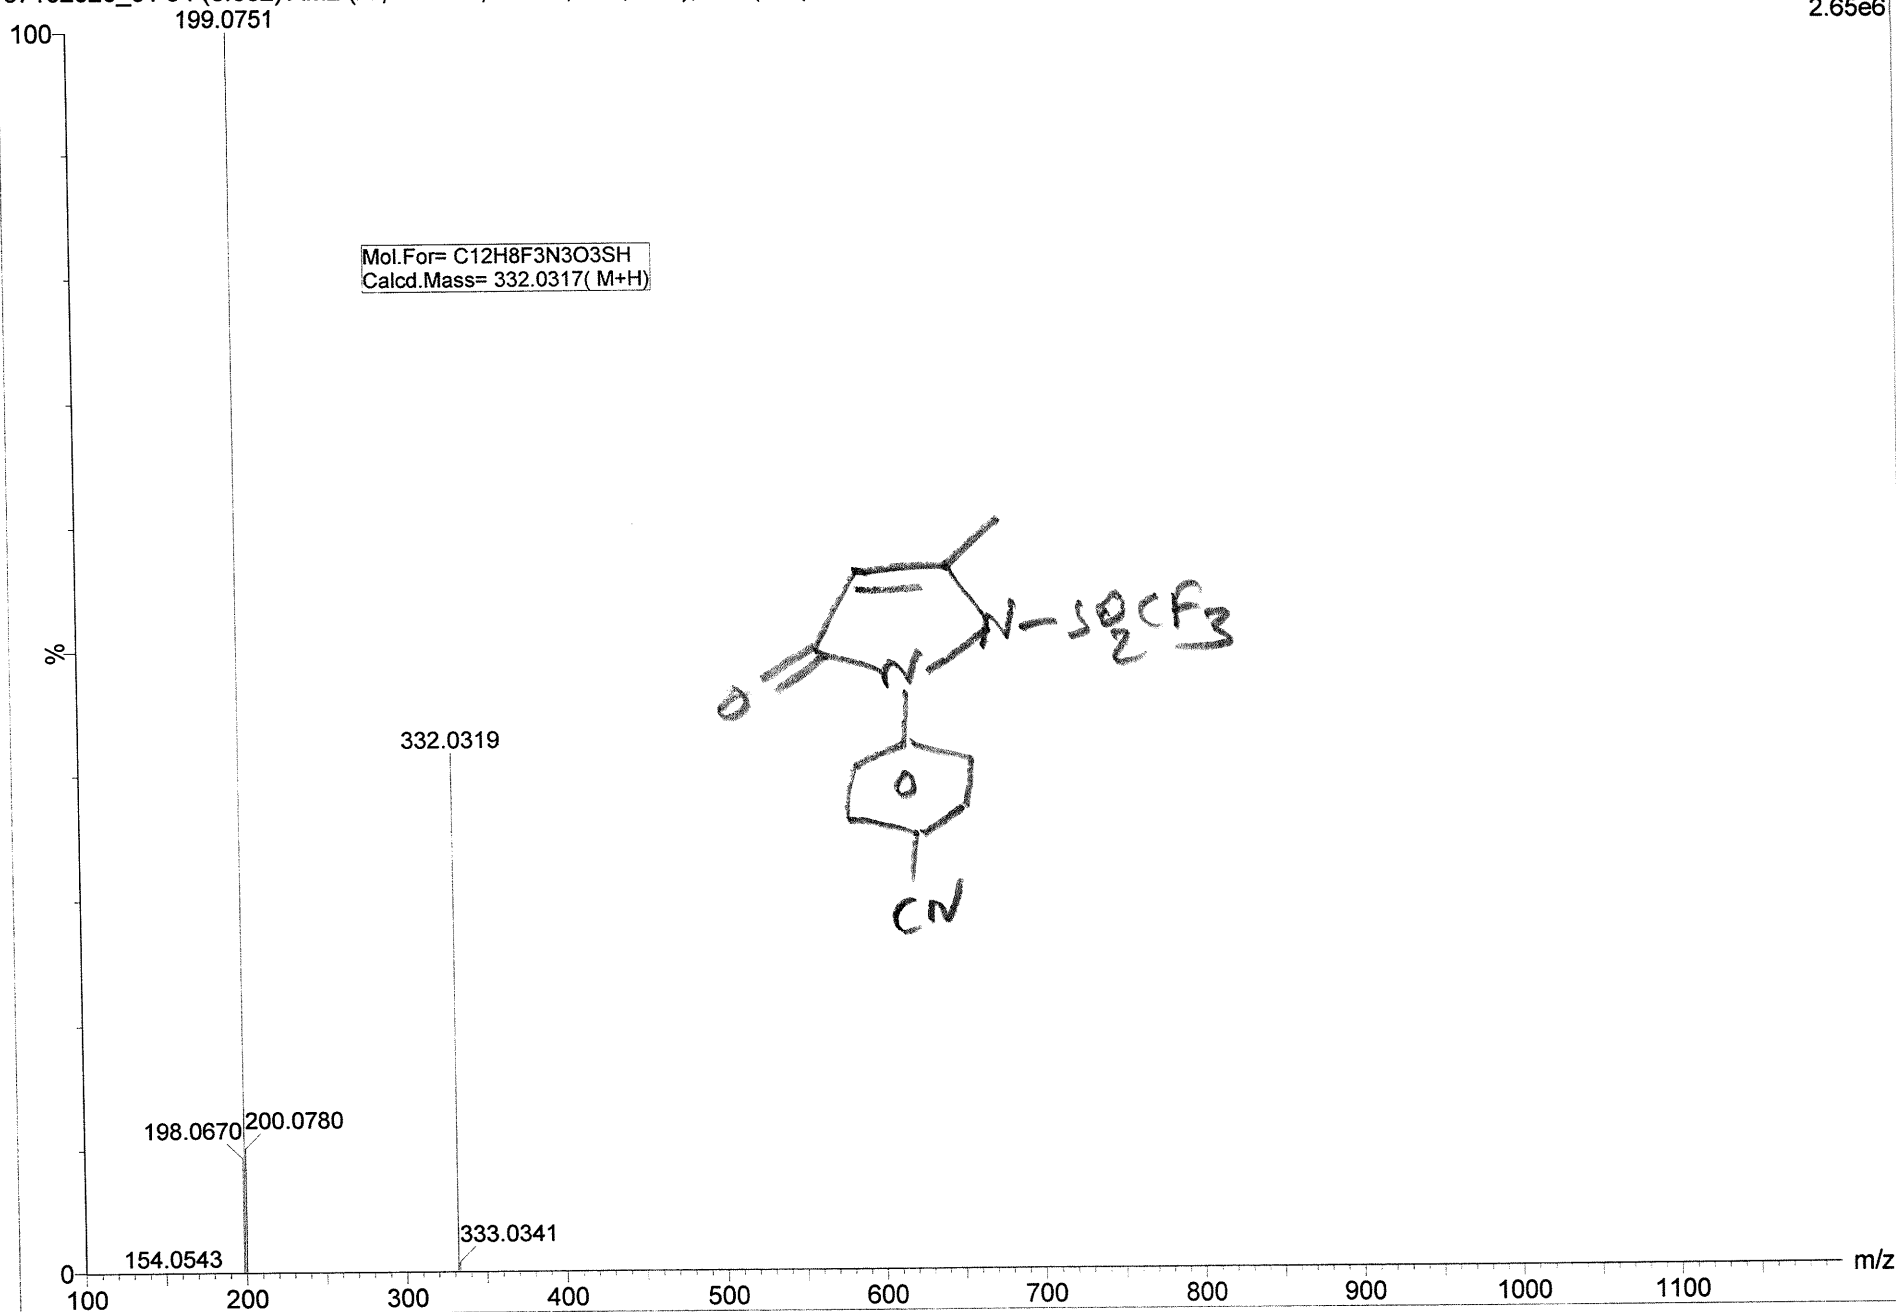



AP-NM-15

IISc Organic Chemistry

06-Oct-2020

06102020\_40 47 (0.459) AM2 (Ar,22000.0,556.28,0.00,LS 3); Cm (47-(1:13+320:429))

1: TOF MS ES+  
4.73e5

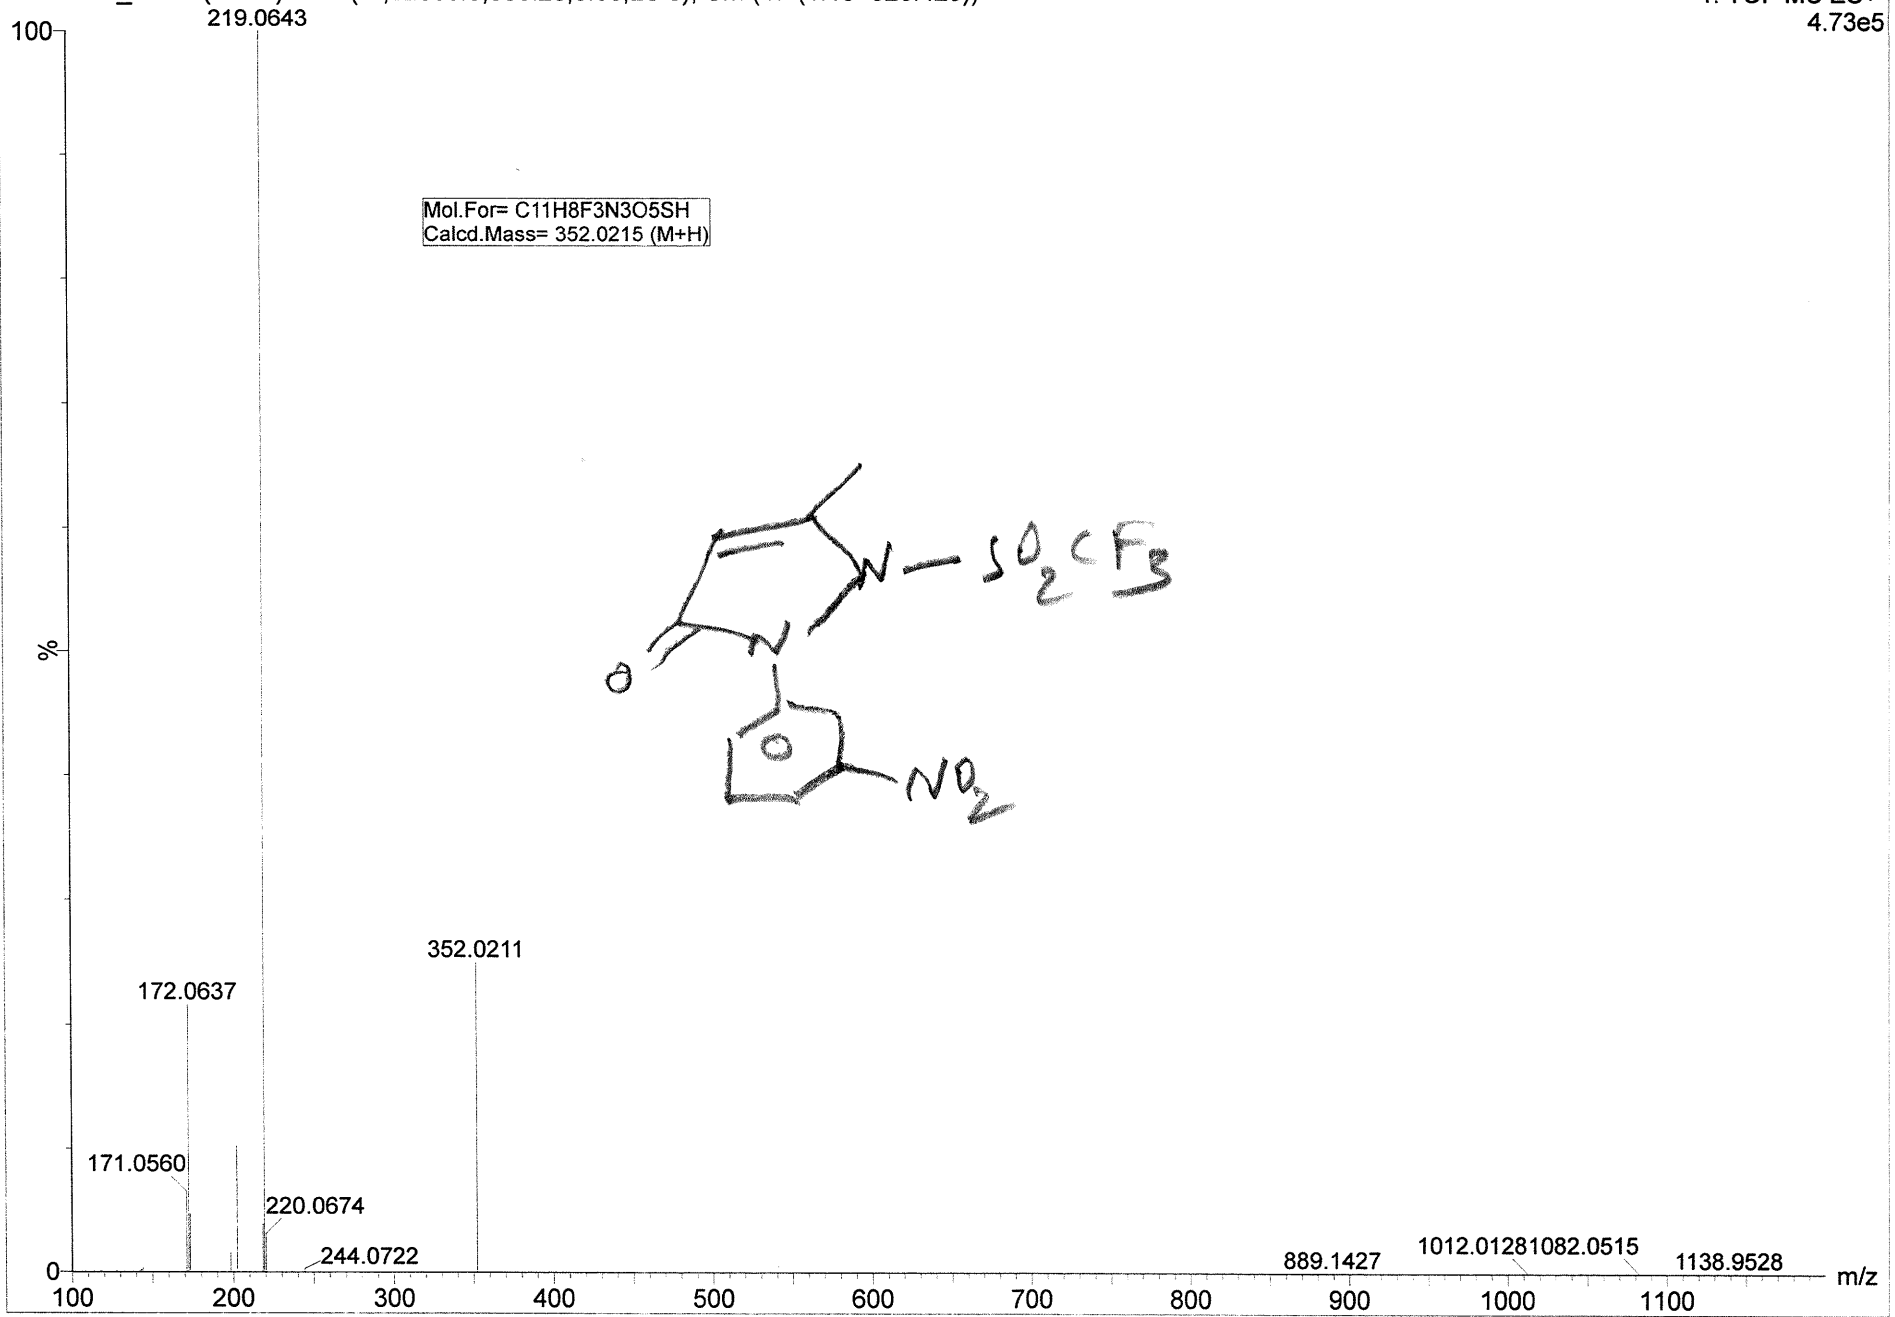

AP-NM-14

IISc Organic Chemistry

06-Oct-2020

06102020\_39 59 (0.562) AM2 (Ar,22000.0,556.28,0.00,LS 3); Cm (59-(1:11+156:351))

1: TOF MS ES+

561.1034

5.17e6

Mol.For= C<sub>12</sub>H<sub>11</sub>F<sub>3</sub>N<sub>2</sub>O<sub>4</sub>SNa  
Calcd.Mass= 359.0289 (M+Na)

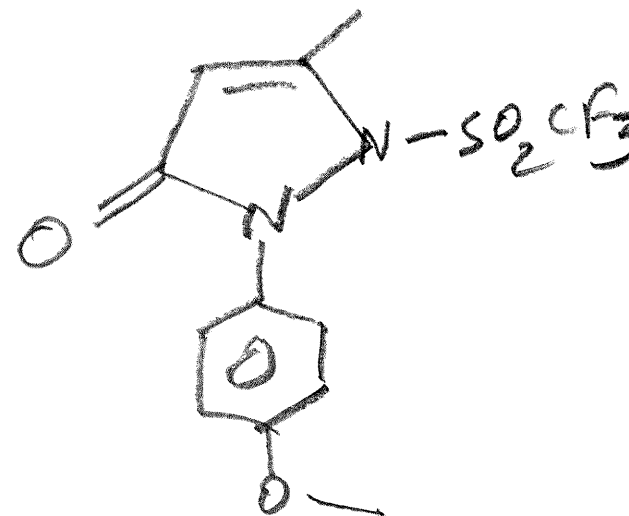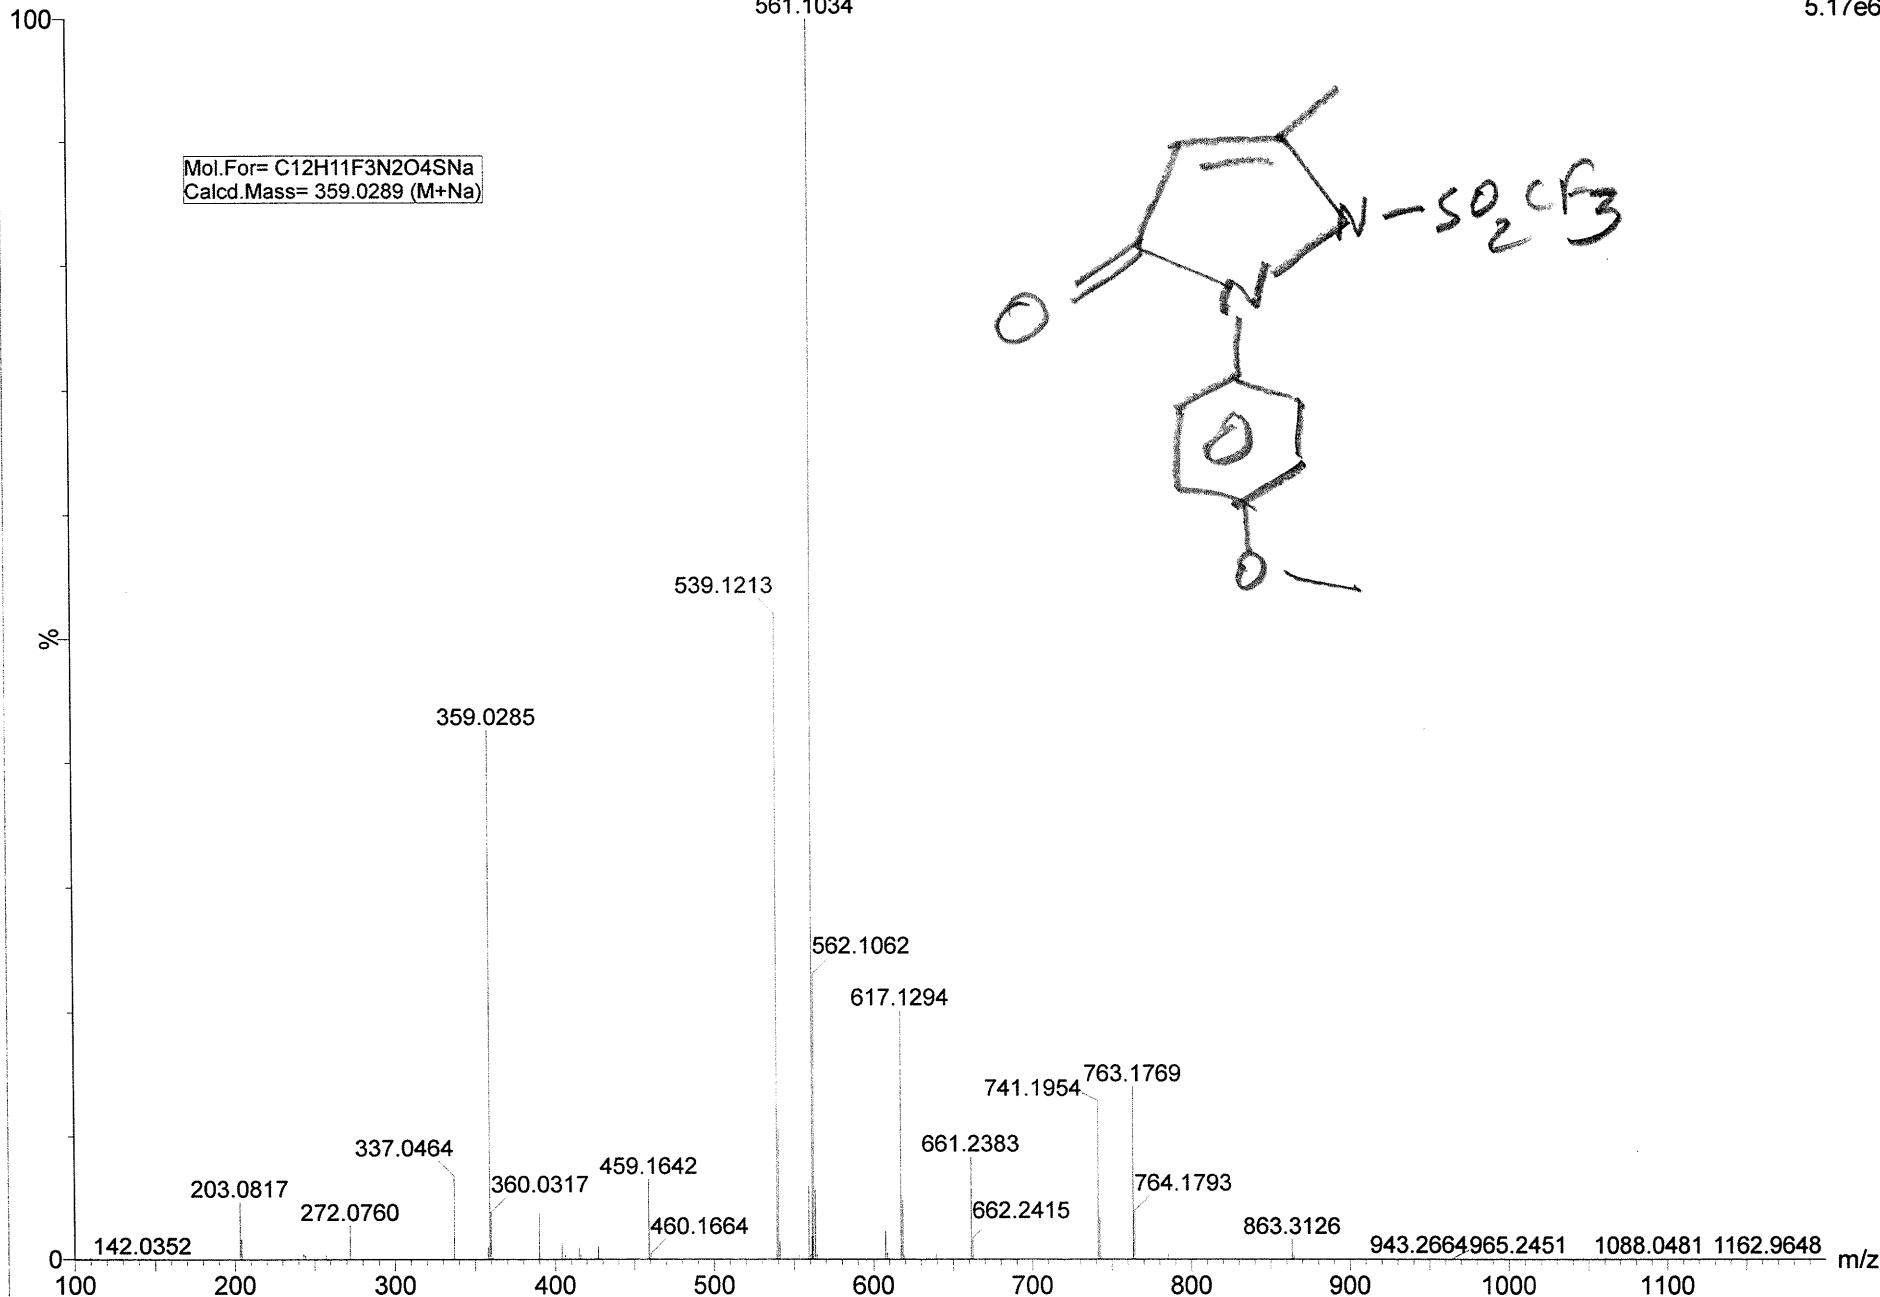

AP-NM-17

IISc Organic Chemistry

06-Oct-2020

06102020\_42 65 (0.614) AM2 (Ar,22000.0,556.28,0.00,LS 3); Cm (65-318:411)

1: TOF MS ES+

8.14e5

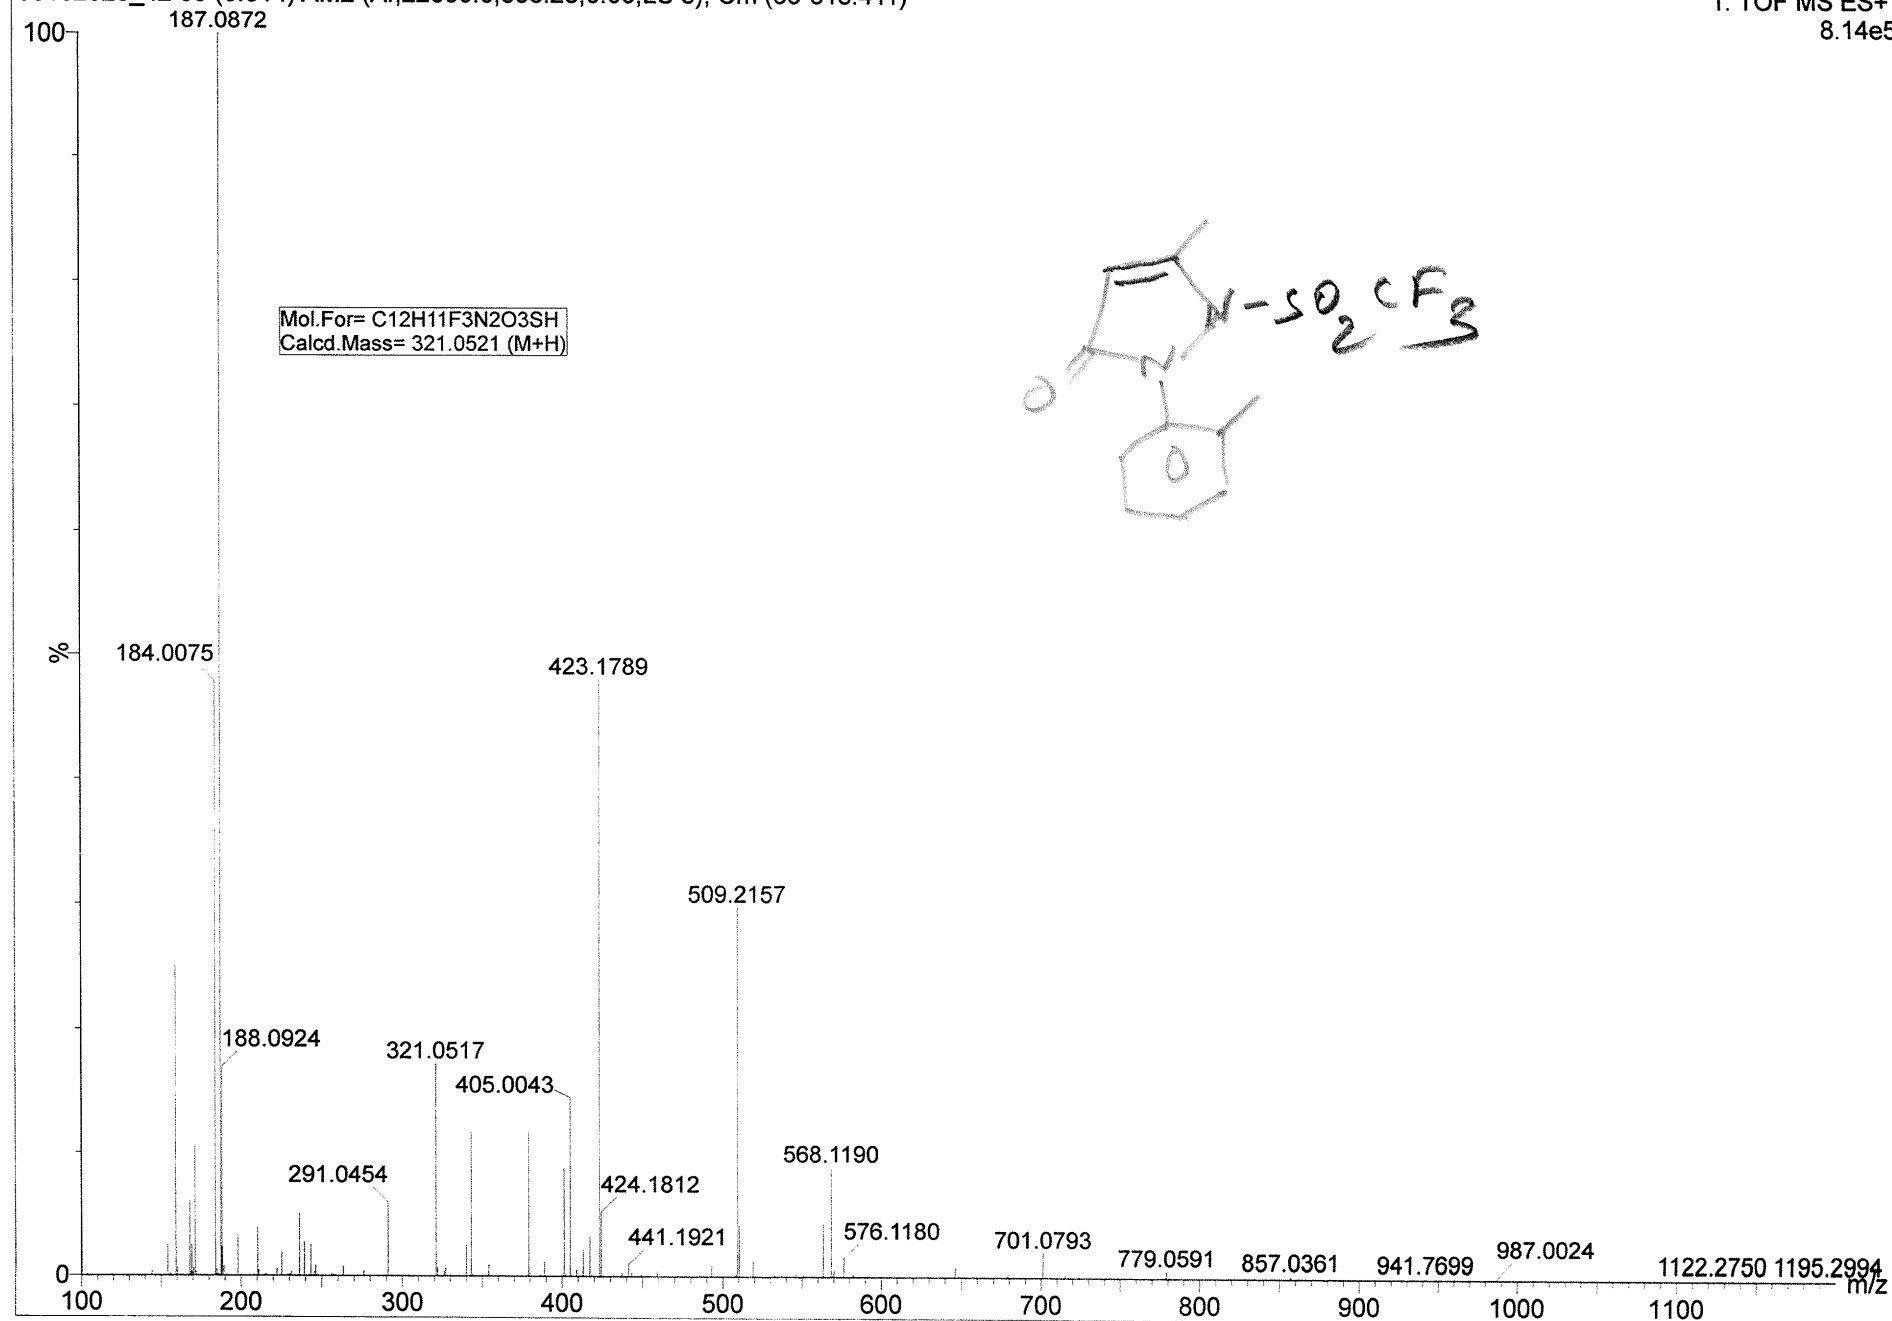

AP-NM-12

IISc Organic Chemistry

06-Oct-2020

06102020\_36 61 (0.579) AM2 (Ar,22000.0,556.28,0.00,LS 3); Cm (61-(1:6+190:222))

1: TOF MS ES+

2.38e6

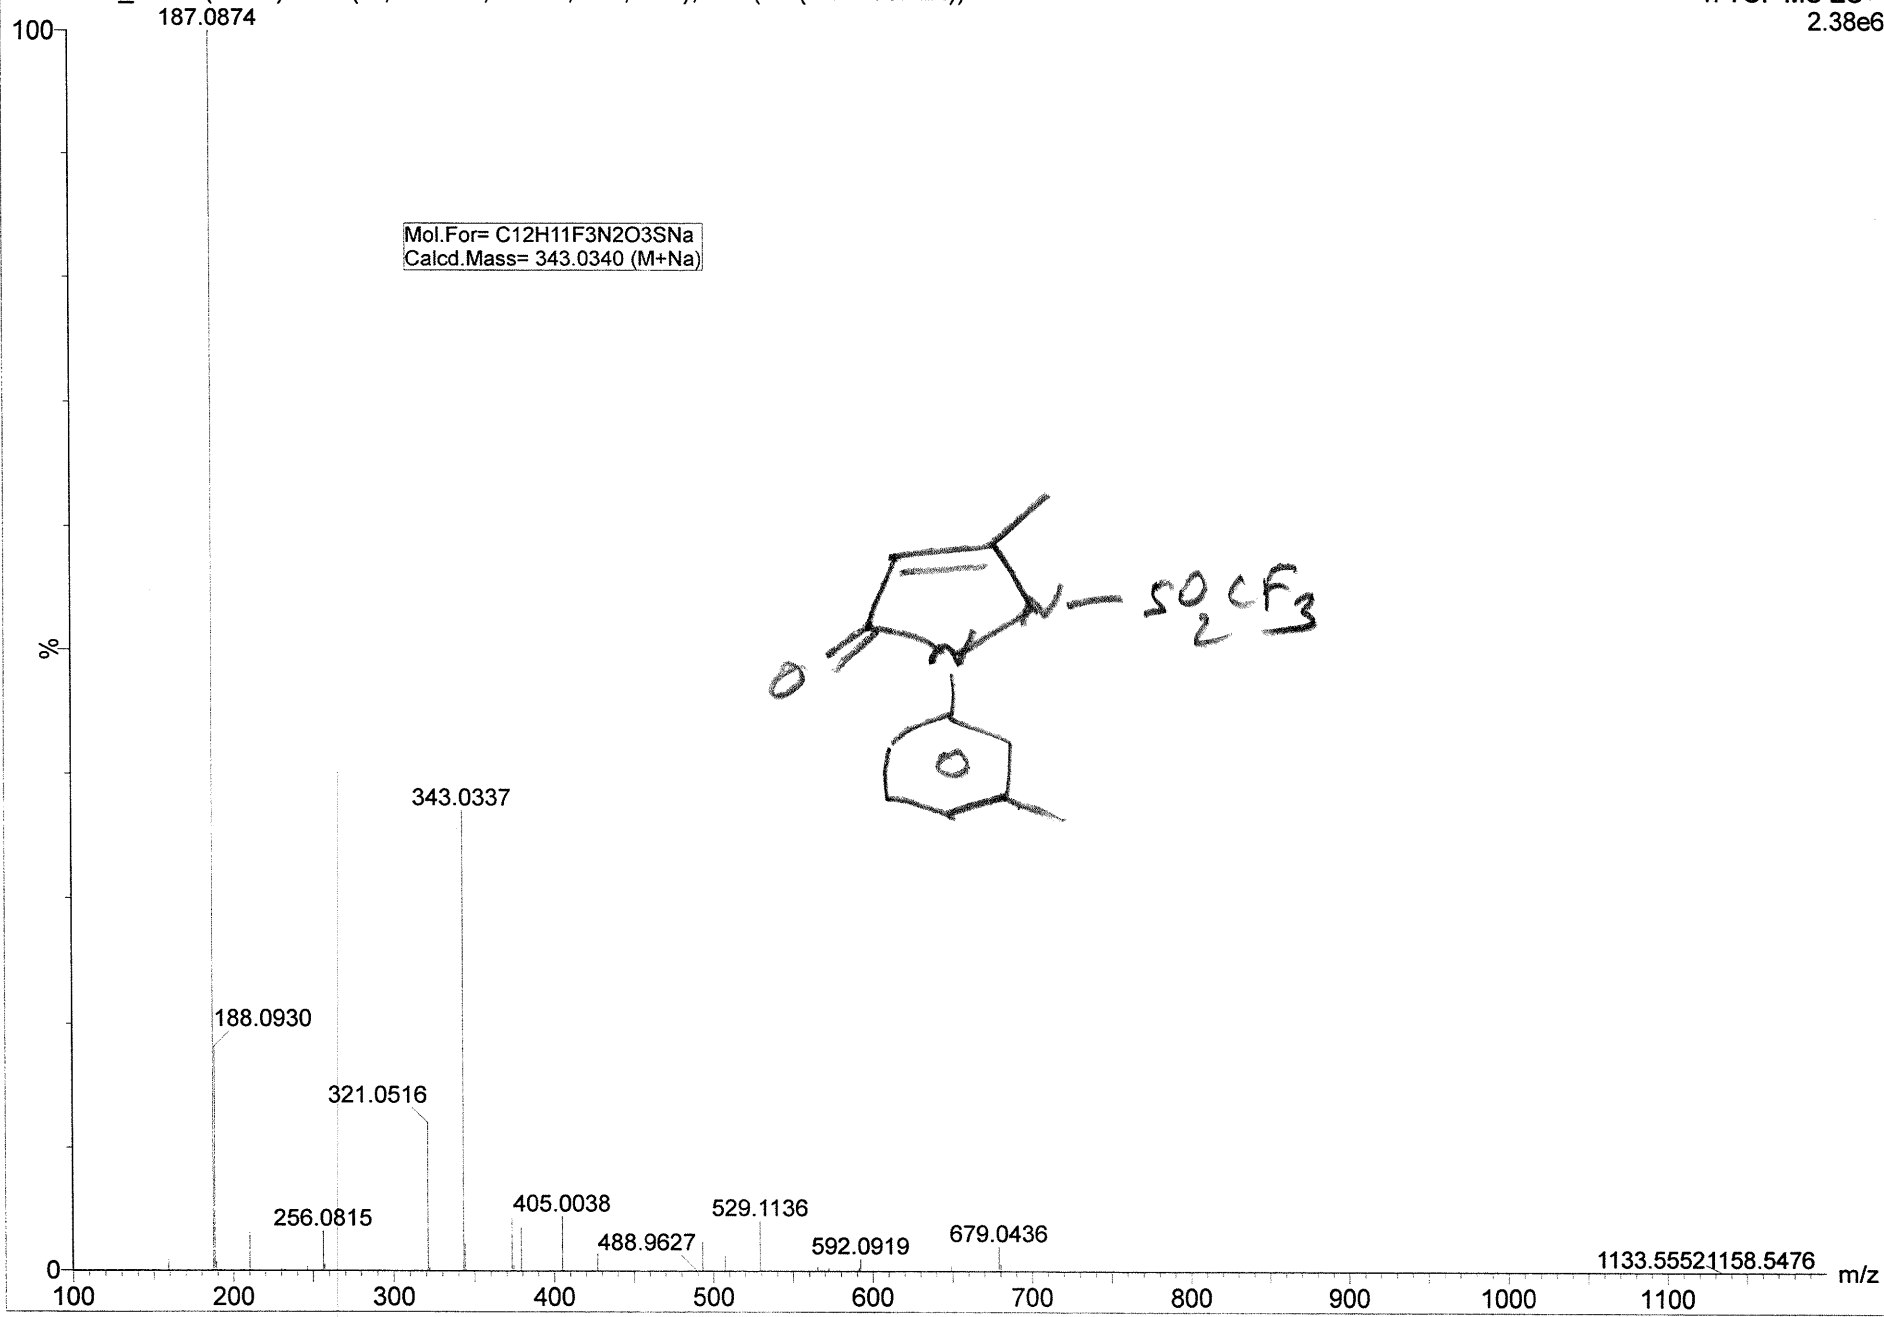

Mol.For= C12H11F3N2O3SNa  
Calcd.Mass= 343.0340 (M+Na)

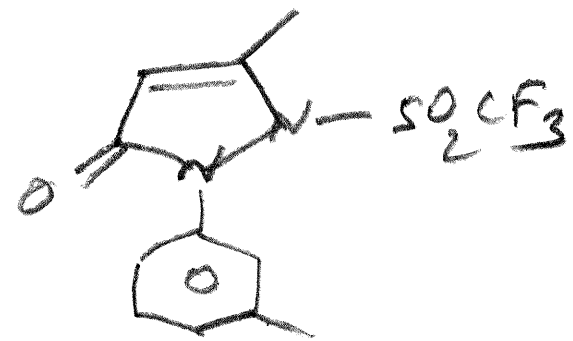

AP-NM-22

IISc Organic Chemistry

27-Oct-2020

27102020\_22 68 (0.639) AM2 (Ar,22000.0,556.28,0.00,LS 3); Cm (68-(18:32+384:435))

1: TOF MS ES+  
2.43e5

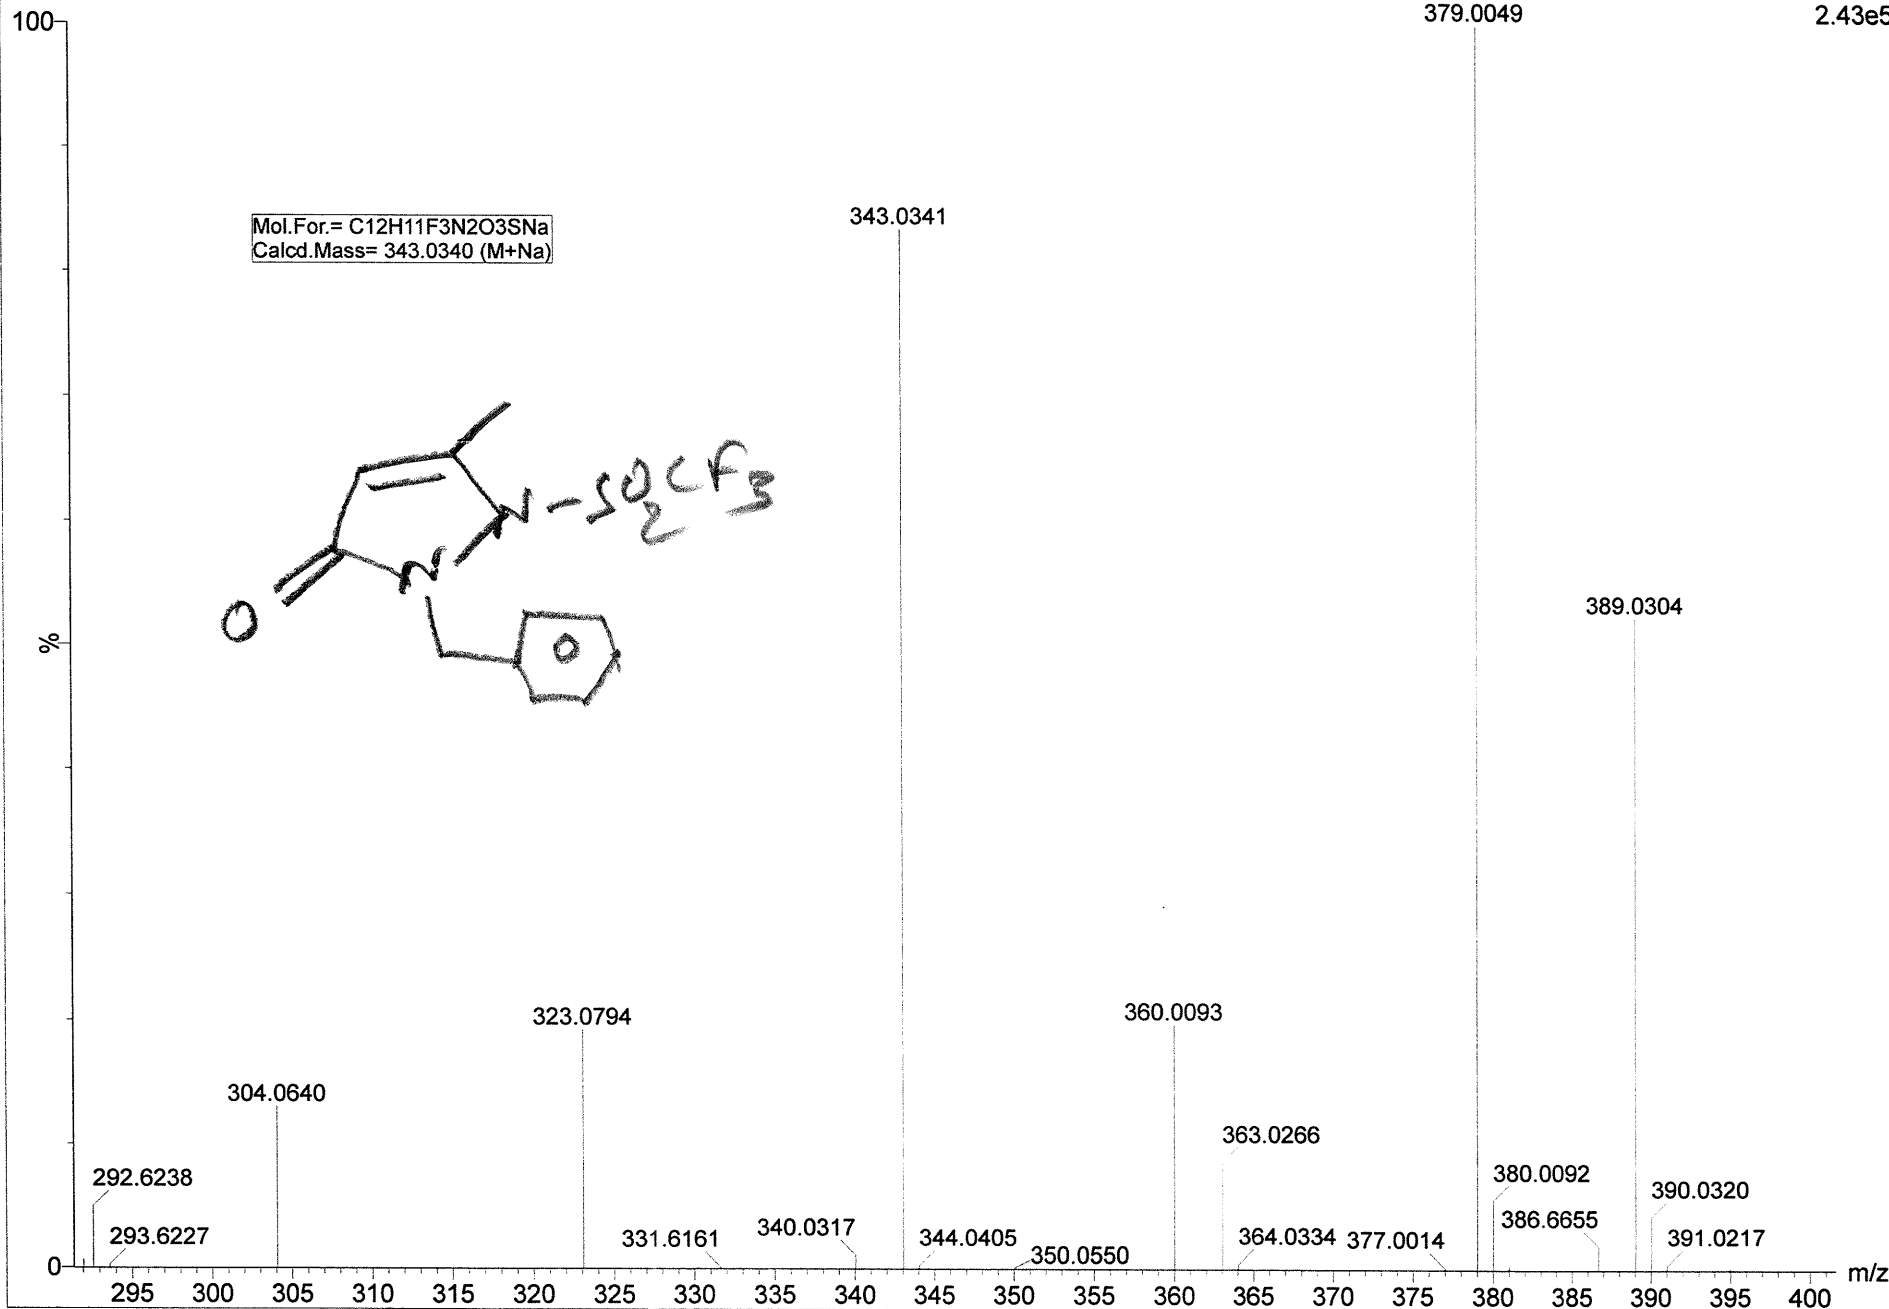

AP-NM-28

04112020\_31 58 (0.554) AM2 (Ar,22000.0,556.28,0.00,LS 3); Cm (58-(1:19+229:323))

IISc Organic Chemistry

04-Nov-2020

1: TOF MS ES+

1.75e6

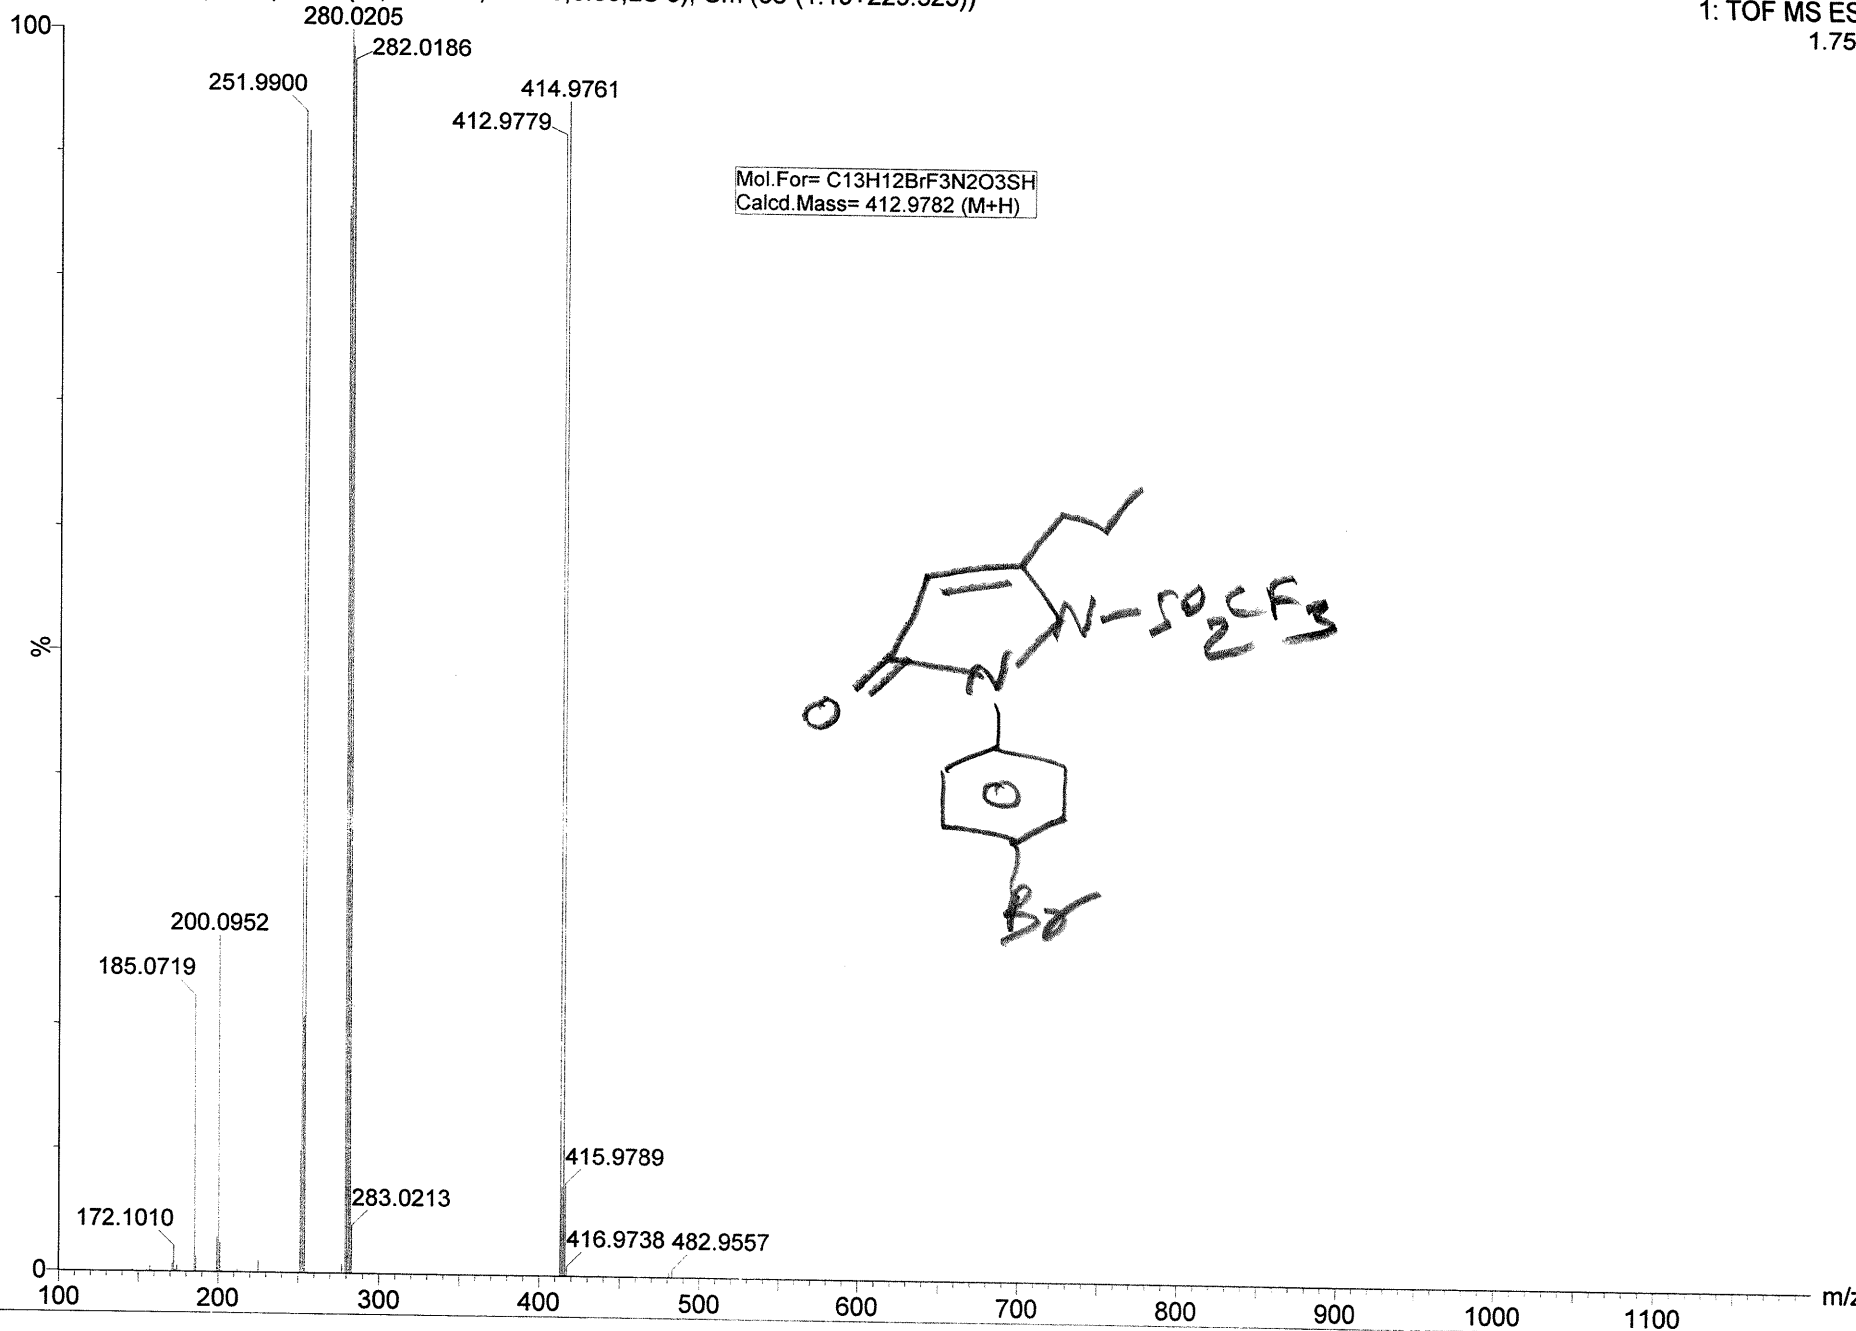

AP-NM-31

04112020\_36 77 (0.736) AM2 (Ar,22000.0,556.28,0.00,LS 3); Cm (77-(1:16+274:310))

IISc Organic Chemistry

04-Nov-2020

1: TOF MS ES+

2.45e6

100

199.0748

Mol. For= C<sub>14</sub>H<sub>12</sub>F<sub>3</sub>N<sub>3</sub>O<sub>3</sub>SH  
Calcd. Mass= 360.0630 (M+H)

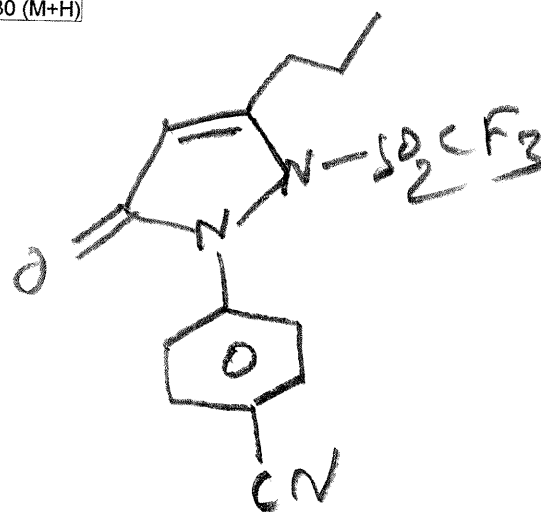

%

0

198.0678

200.0779

277.1144

278.1184

360.0627

361.0667

100

200

300

400

500

600

700

800

900

1000

1100

m/z

AP-NM-33

04112020\_34 70 (0.657) AM2 (Ar,22000.0,556.28,0.00,LS 3); Cm (70-(1:34+195:351))

IISc Organic Chemistry

04-Nov-2020

1: TOF MS ES+

9.78e6

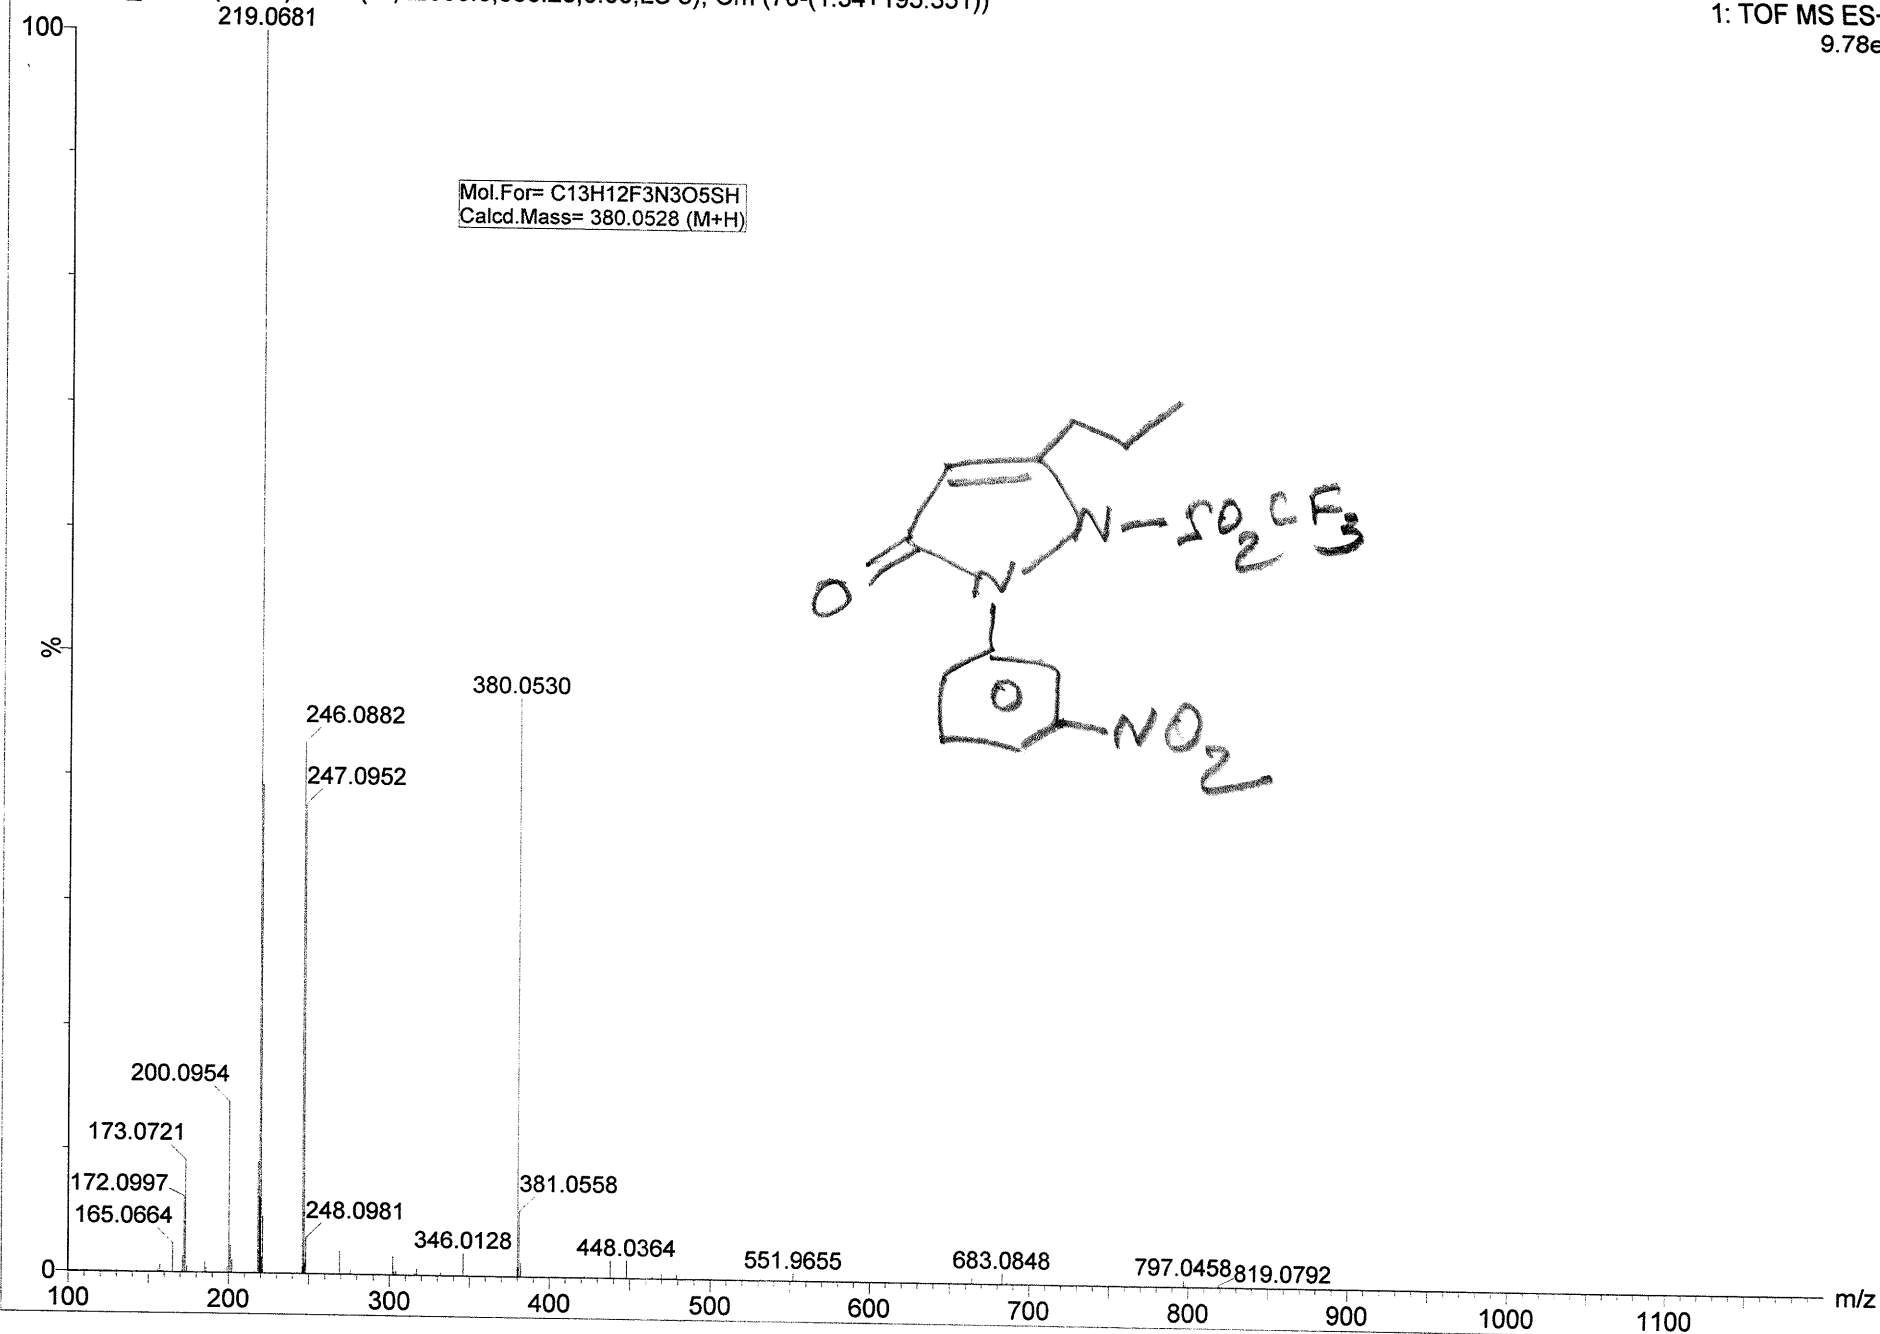



AP-NM-27

04112020\_28 73 (0.682) AM2 (Ar,22000.0,556.28,0.00,LS 3); Cm (73-(1:6+168:179))

IISc Organic Chemistry

04-Nov-2020

1: TOF MS ES+

1.72e6

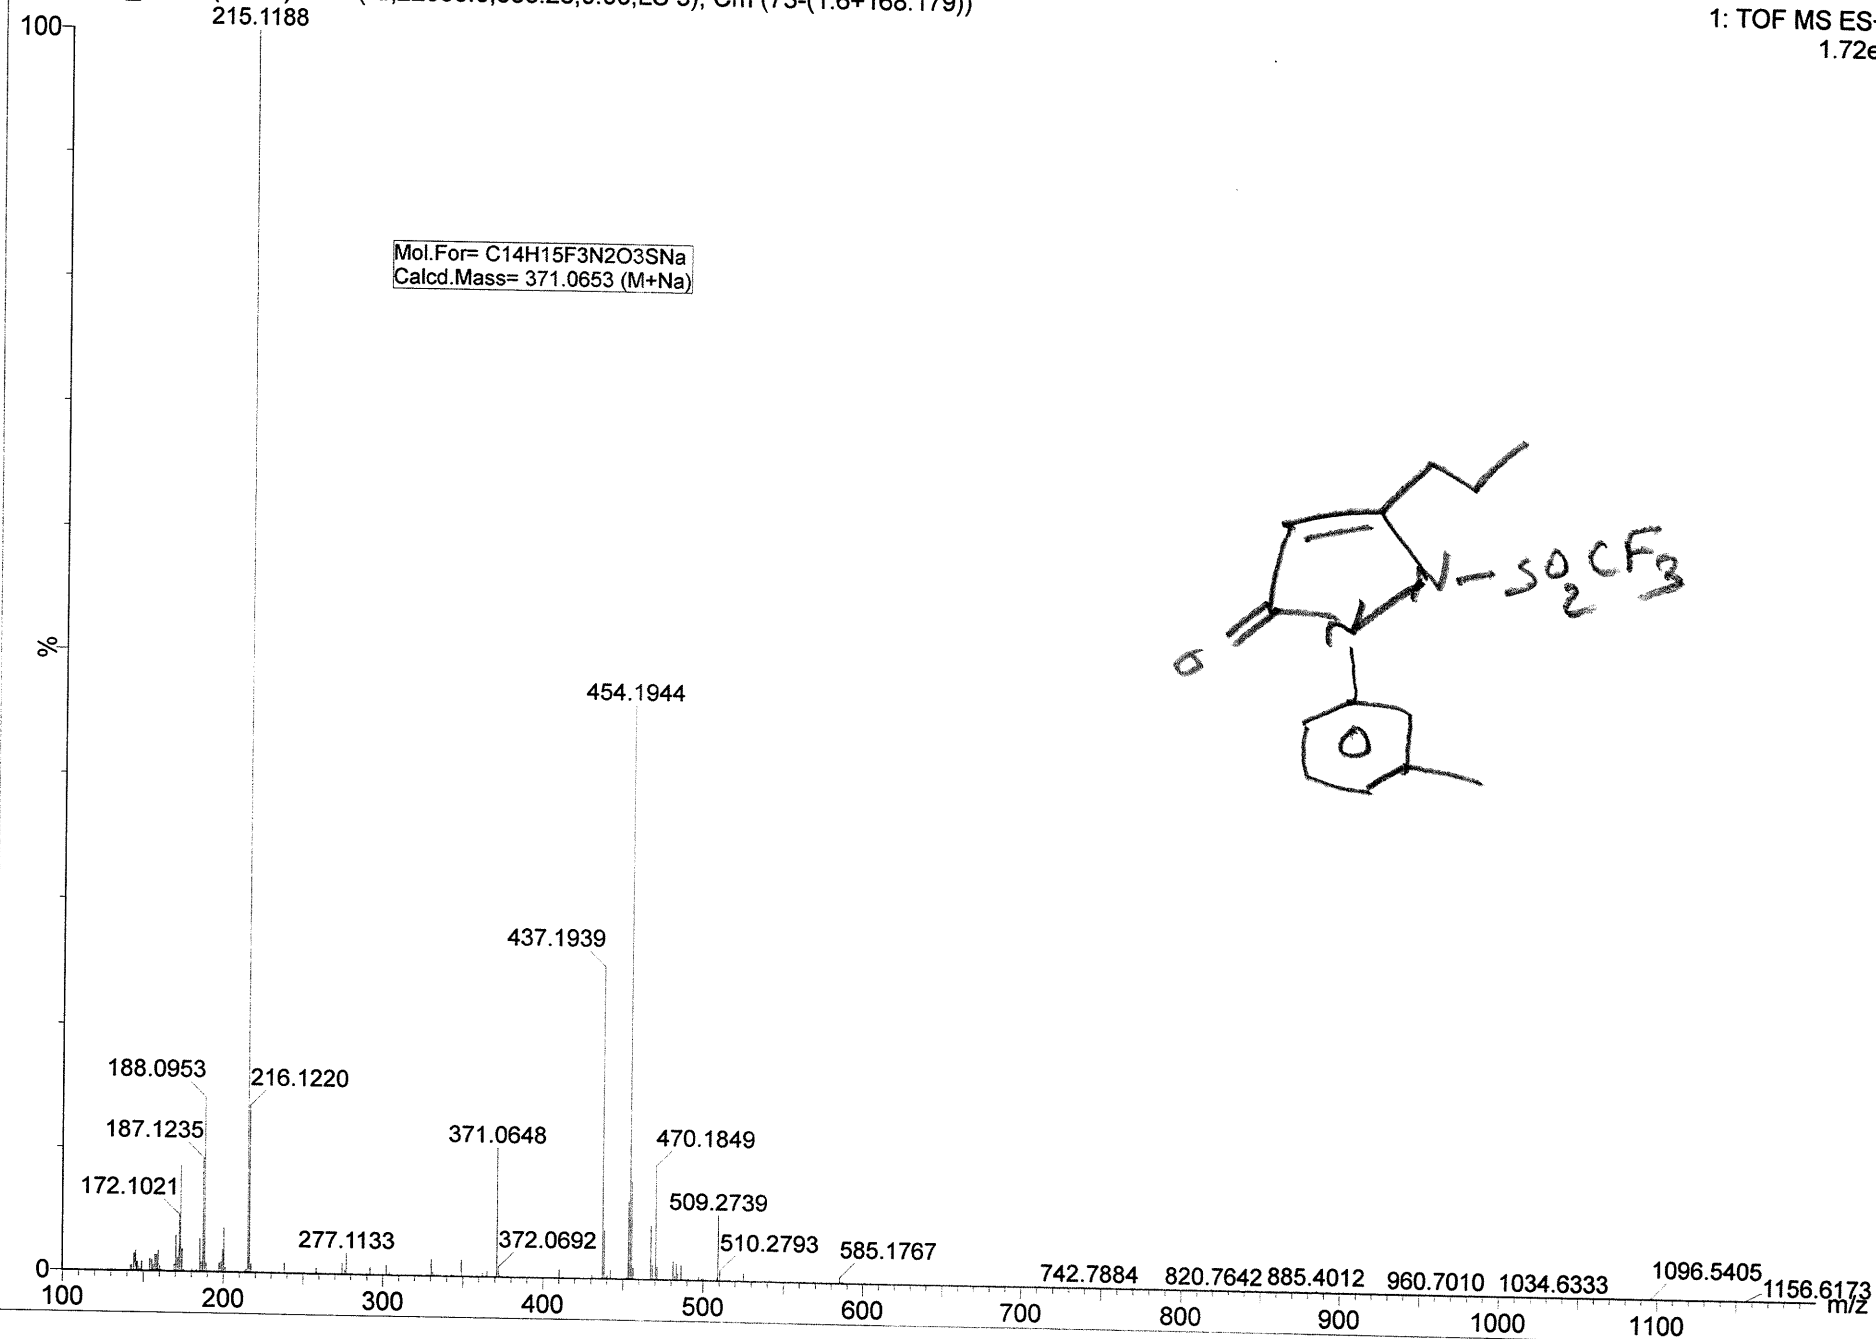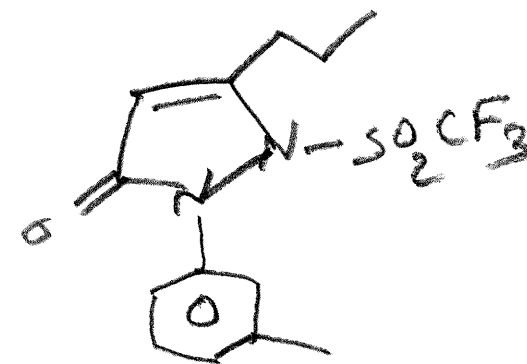

AP-NM-23

27102020\_18 73 (0.682) AM2 (Ar,22000.0,556.28,0.00,LS 3); Cm (73-(1:37+191:436))

IISc Organic Chemistry

27-Oct-2020

1: TOF MS ES+  
6.00e6

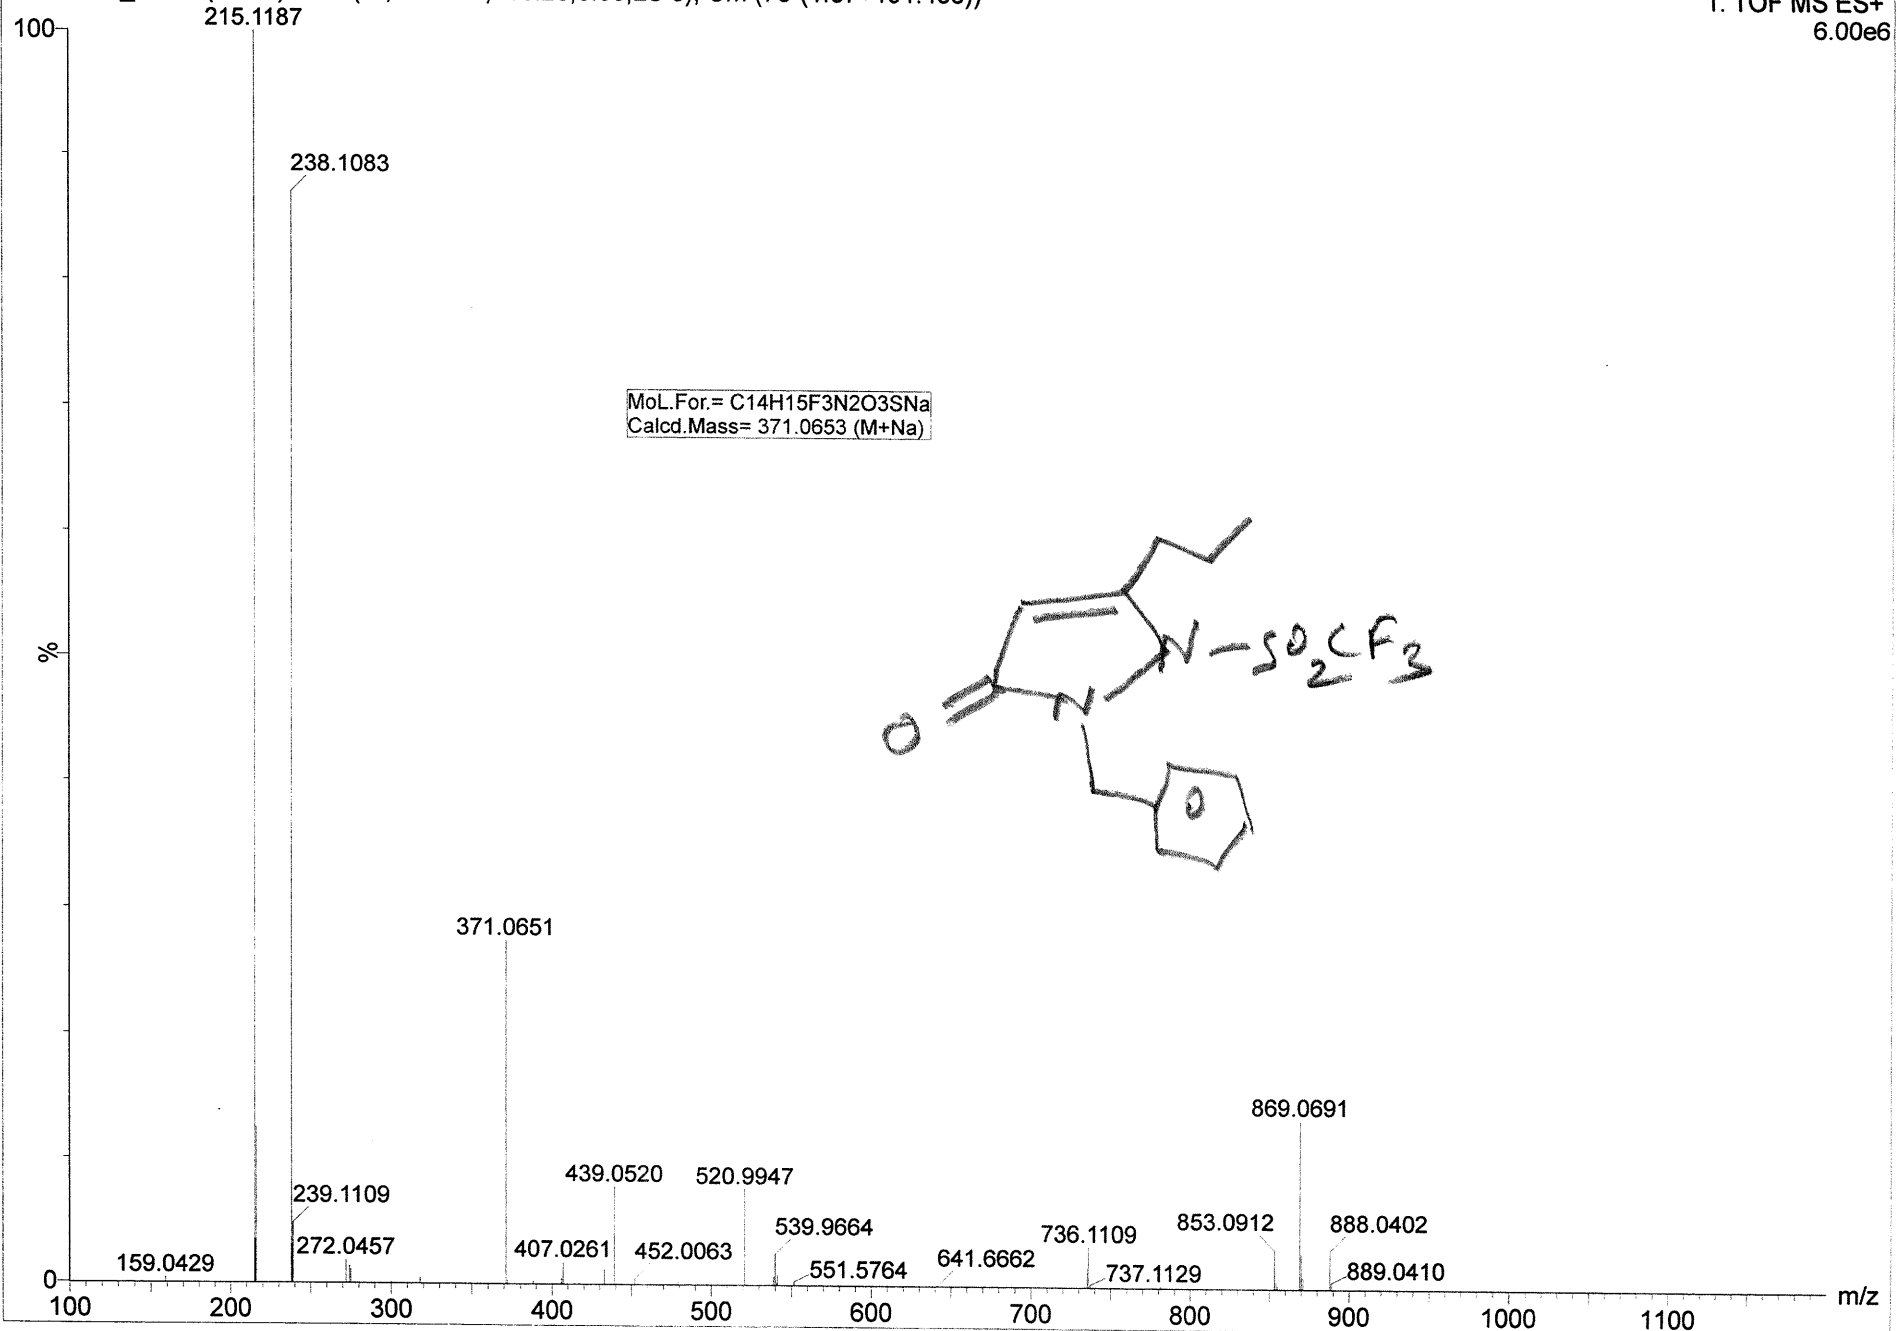

AP-NM-29

IISc Organic Chemistry

04-Nov-2020

04112020\_32 80 (0.762) AM2 (Ar,22000.0,556.28,0.00,LS 3); Cm (80-(1:16+174:197))

1: TOF MS ES+  
8.79e5

100

Mol. For= C<sub>13</sub>H<sub>12</sub>BrF<sub>3</sub>N<sub>2</sub>O<sub>3</sub>S  
Calcd. Mass= 412.9782 (M+H)

412.9779

414.9762

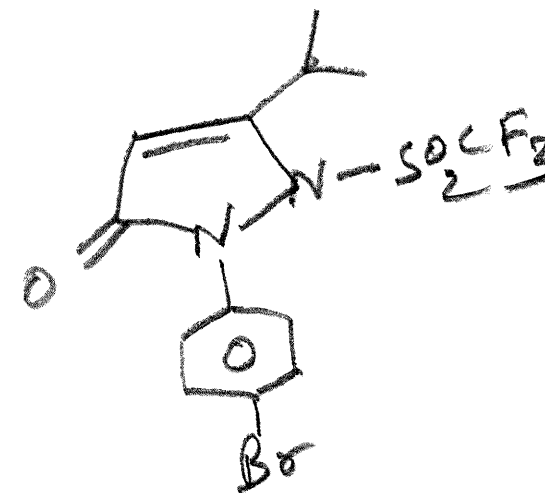

%

415.9792

416.9740

0

396 398 400 402 404 406 408 410 412 414 416 418 420 422 424 426 428 430 m/z

AP-NM-30

04112020\_35 67 (0.631) AM2 (Ar,22000.0,556.28,0.00,LS 3); Cm (67-(1:21+172:254))

IISc Organic Chemistry

04-Nov-2020

1: TOF MS ES+

6.09e6

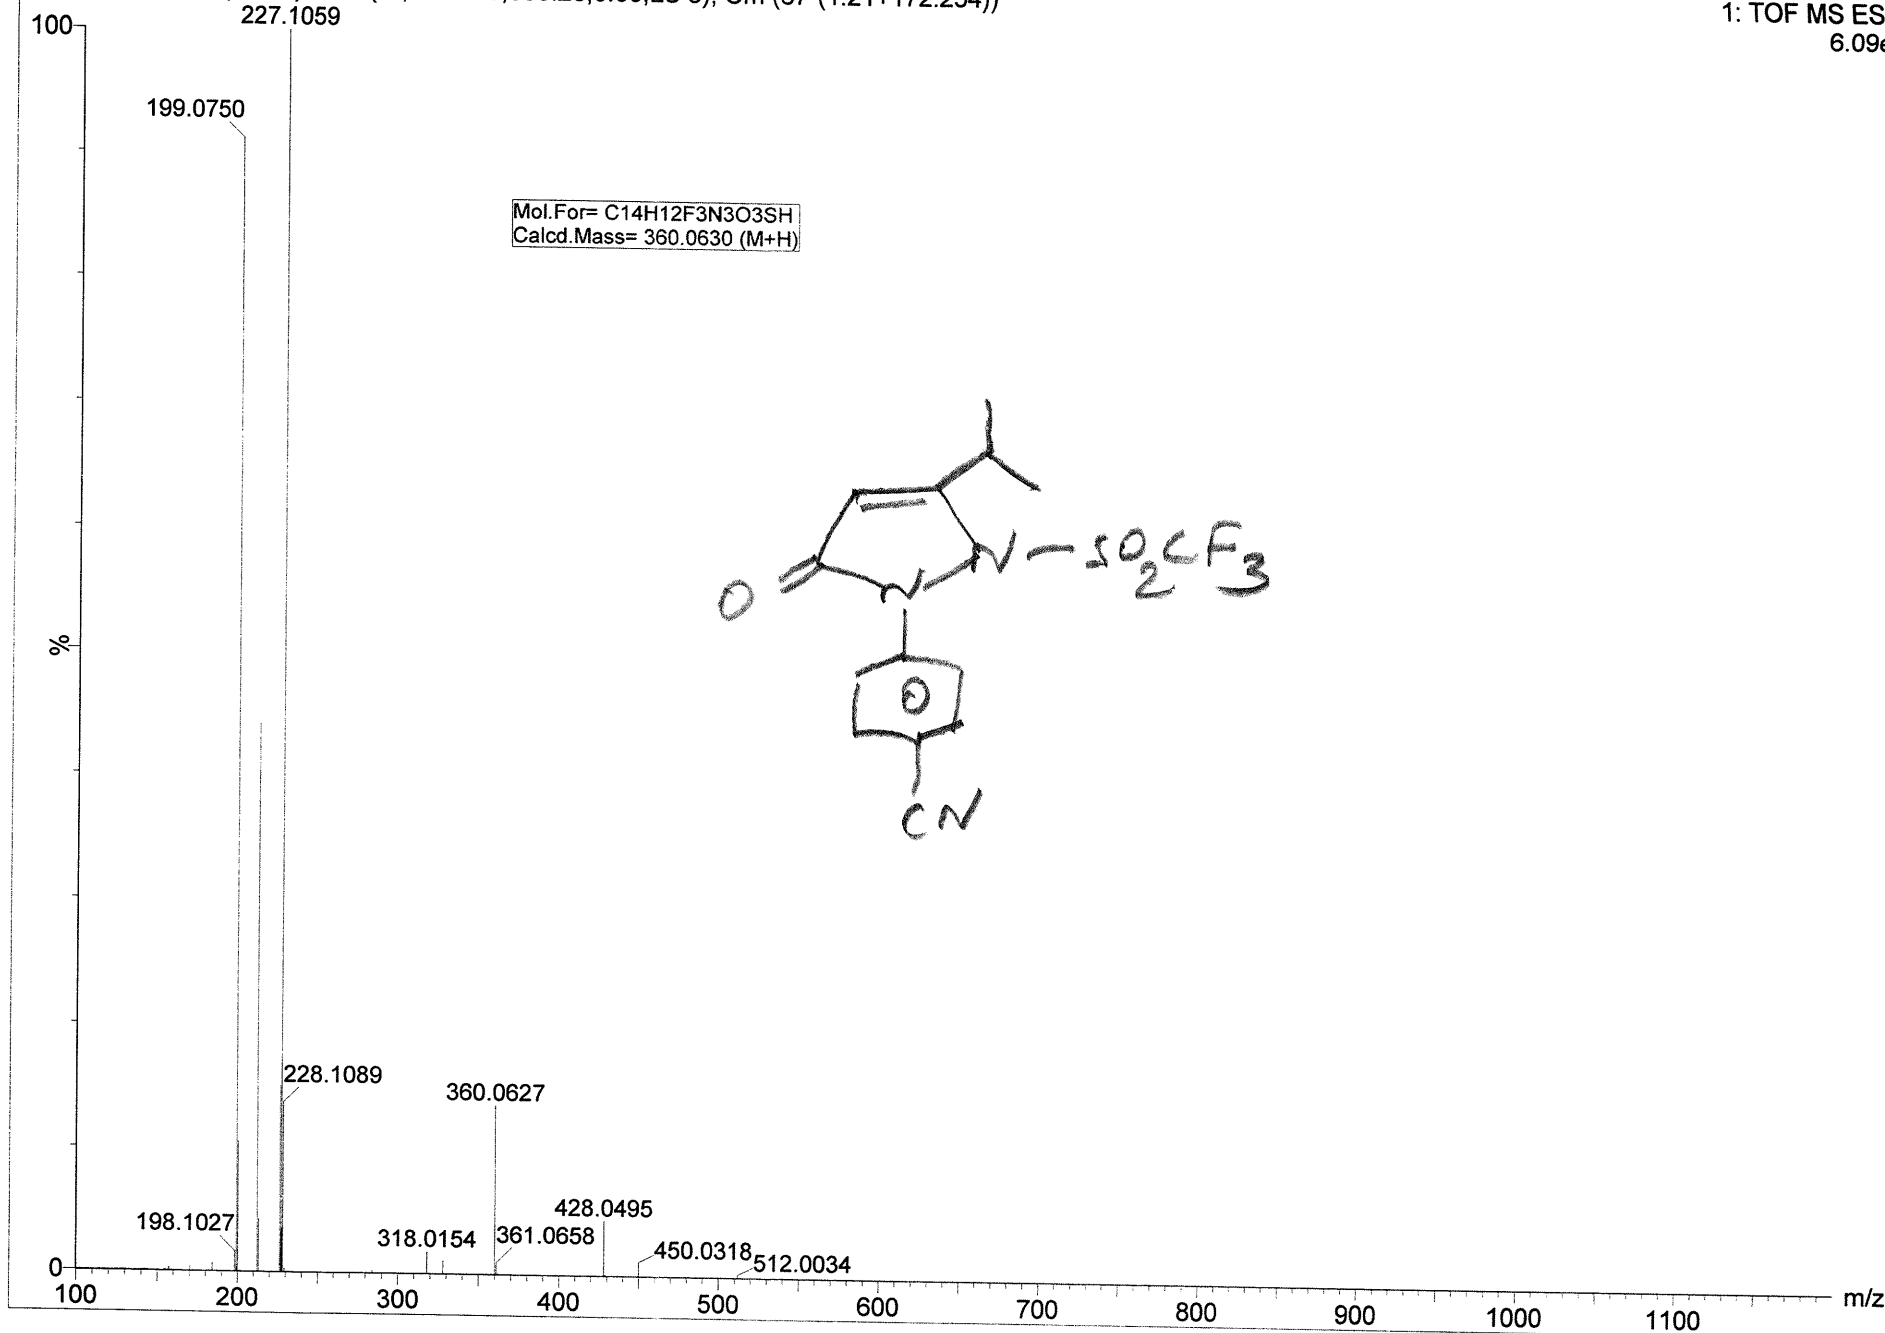

Mol. For= C<sub>14</sub>H<sub>12</sub>F<sub>3</sub>N<sub>3</sub>O<sub>3</sub>SH  
Calcd. Mass= 360.0630 (M+H)

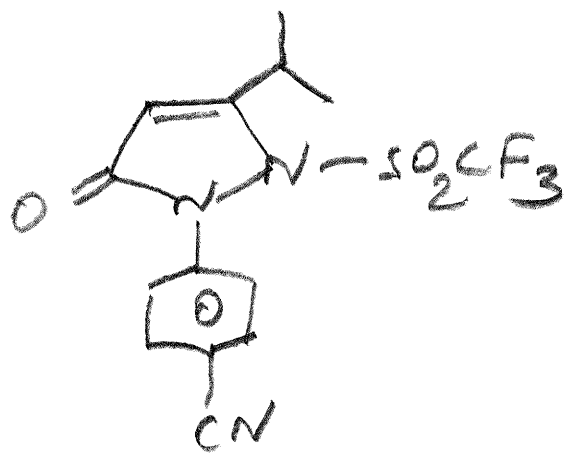

AP-NM-32

IISc Organic Chemistry

04-Nov-2020

04112020\_33 75 (0.719) AM2 (Ar,22000.0,556.28,0.00,LS 3); Cm (75-231:315)

1: TOF MS ES+  
3.72e6

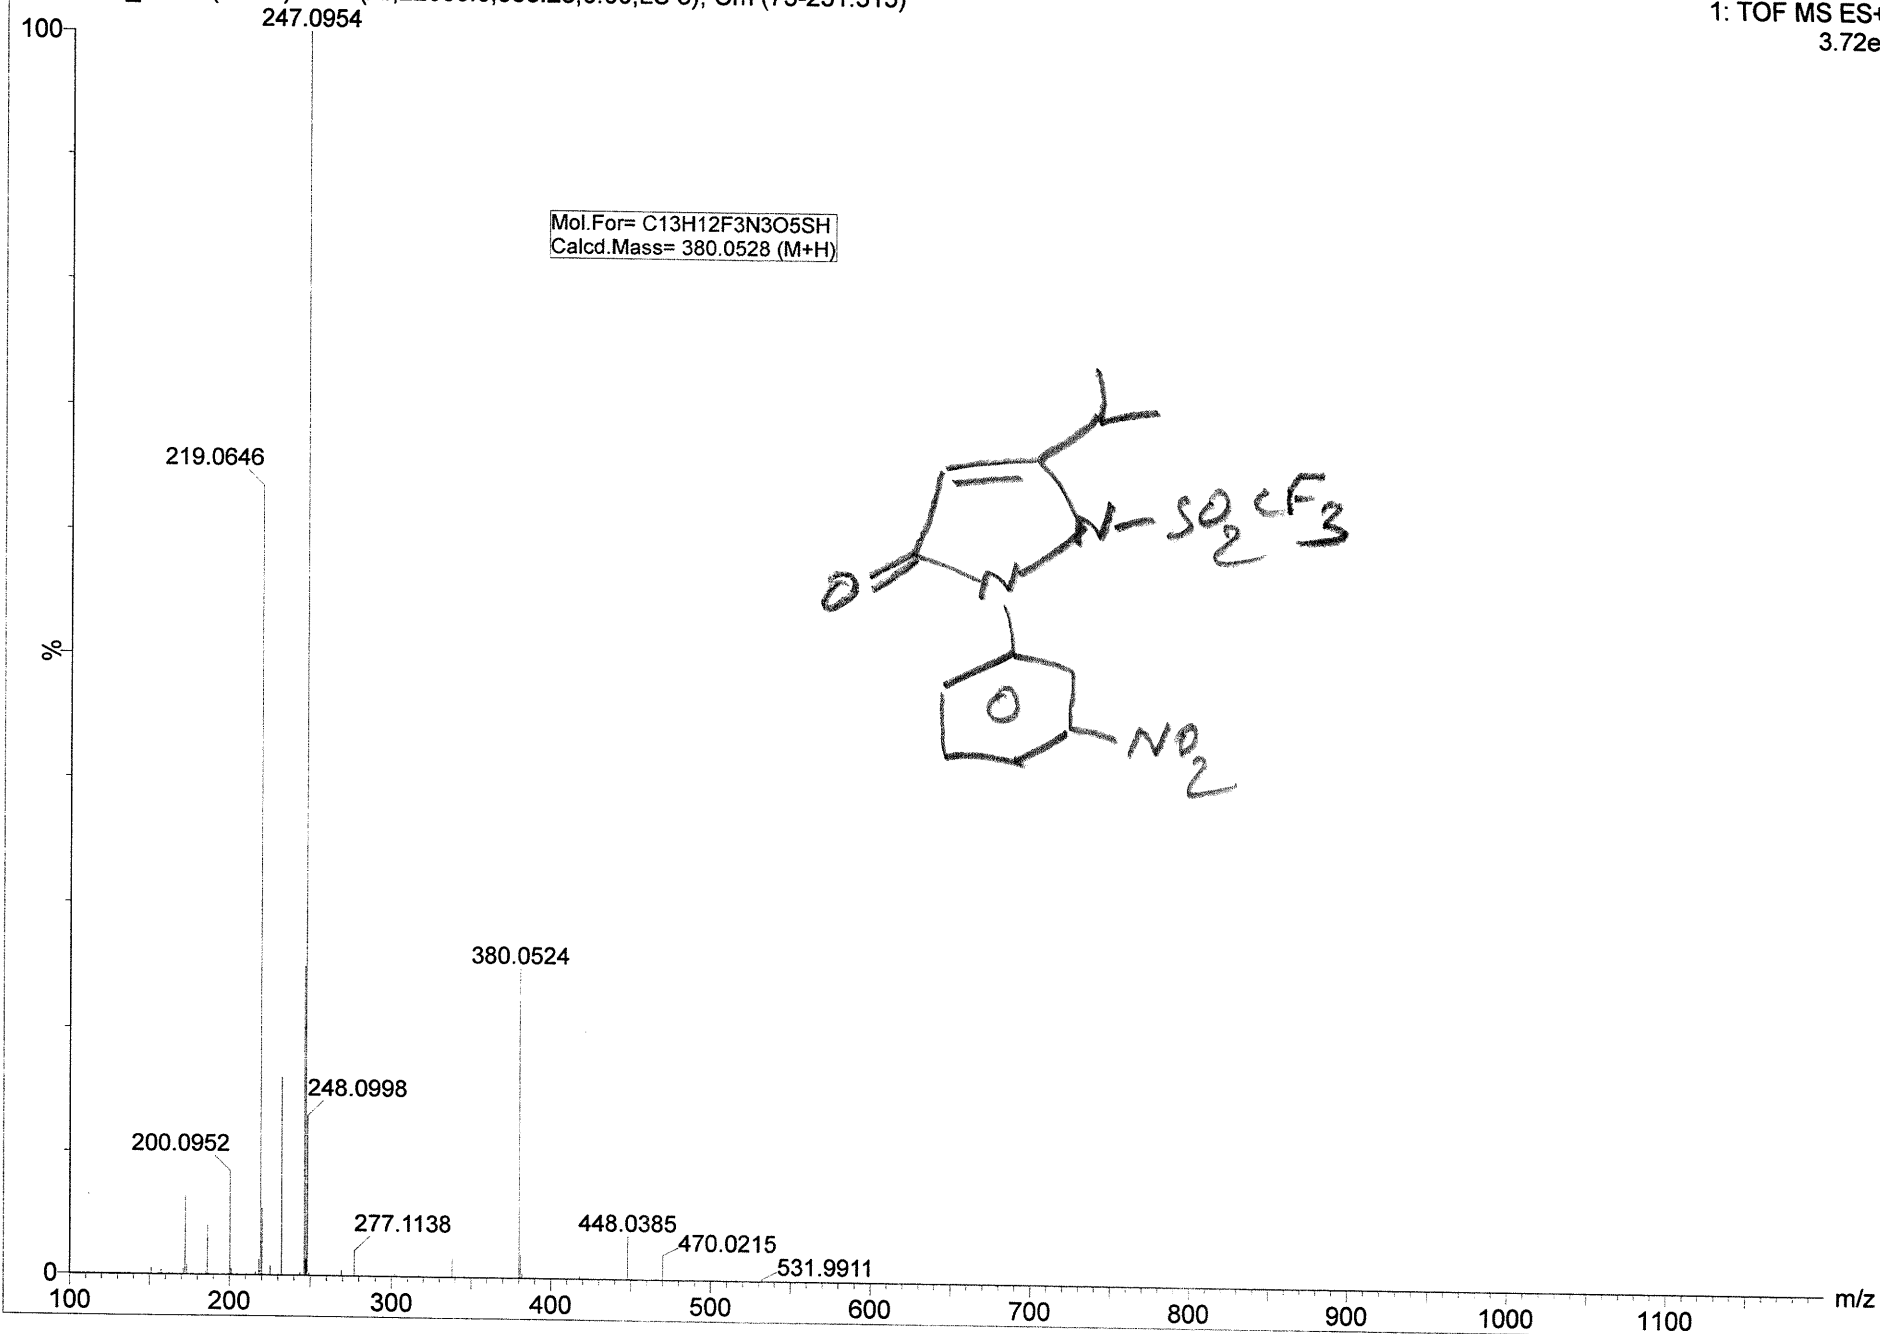

AP-NM-26

04112020\_27 71 (0.665) AM2 (Ar,22000.0,556.28,0.00,LS 3); Cm (71-(1:12+229:339))

IISc Organic Chemistry

04-Nov-2020

1: TOF MS ES+

1.63e6

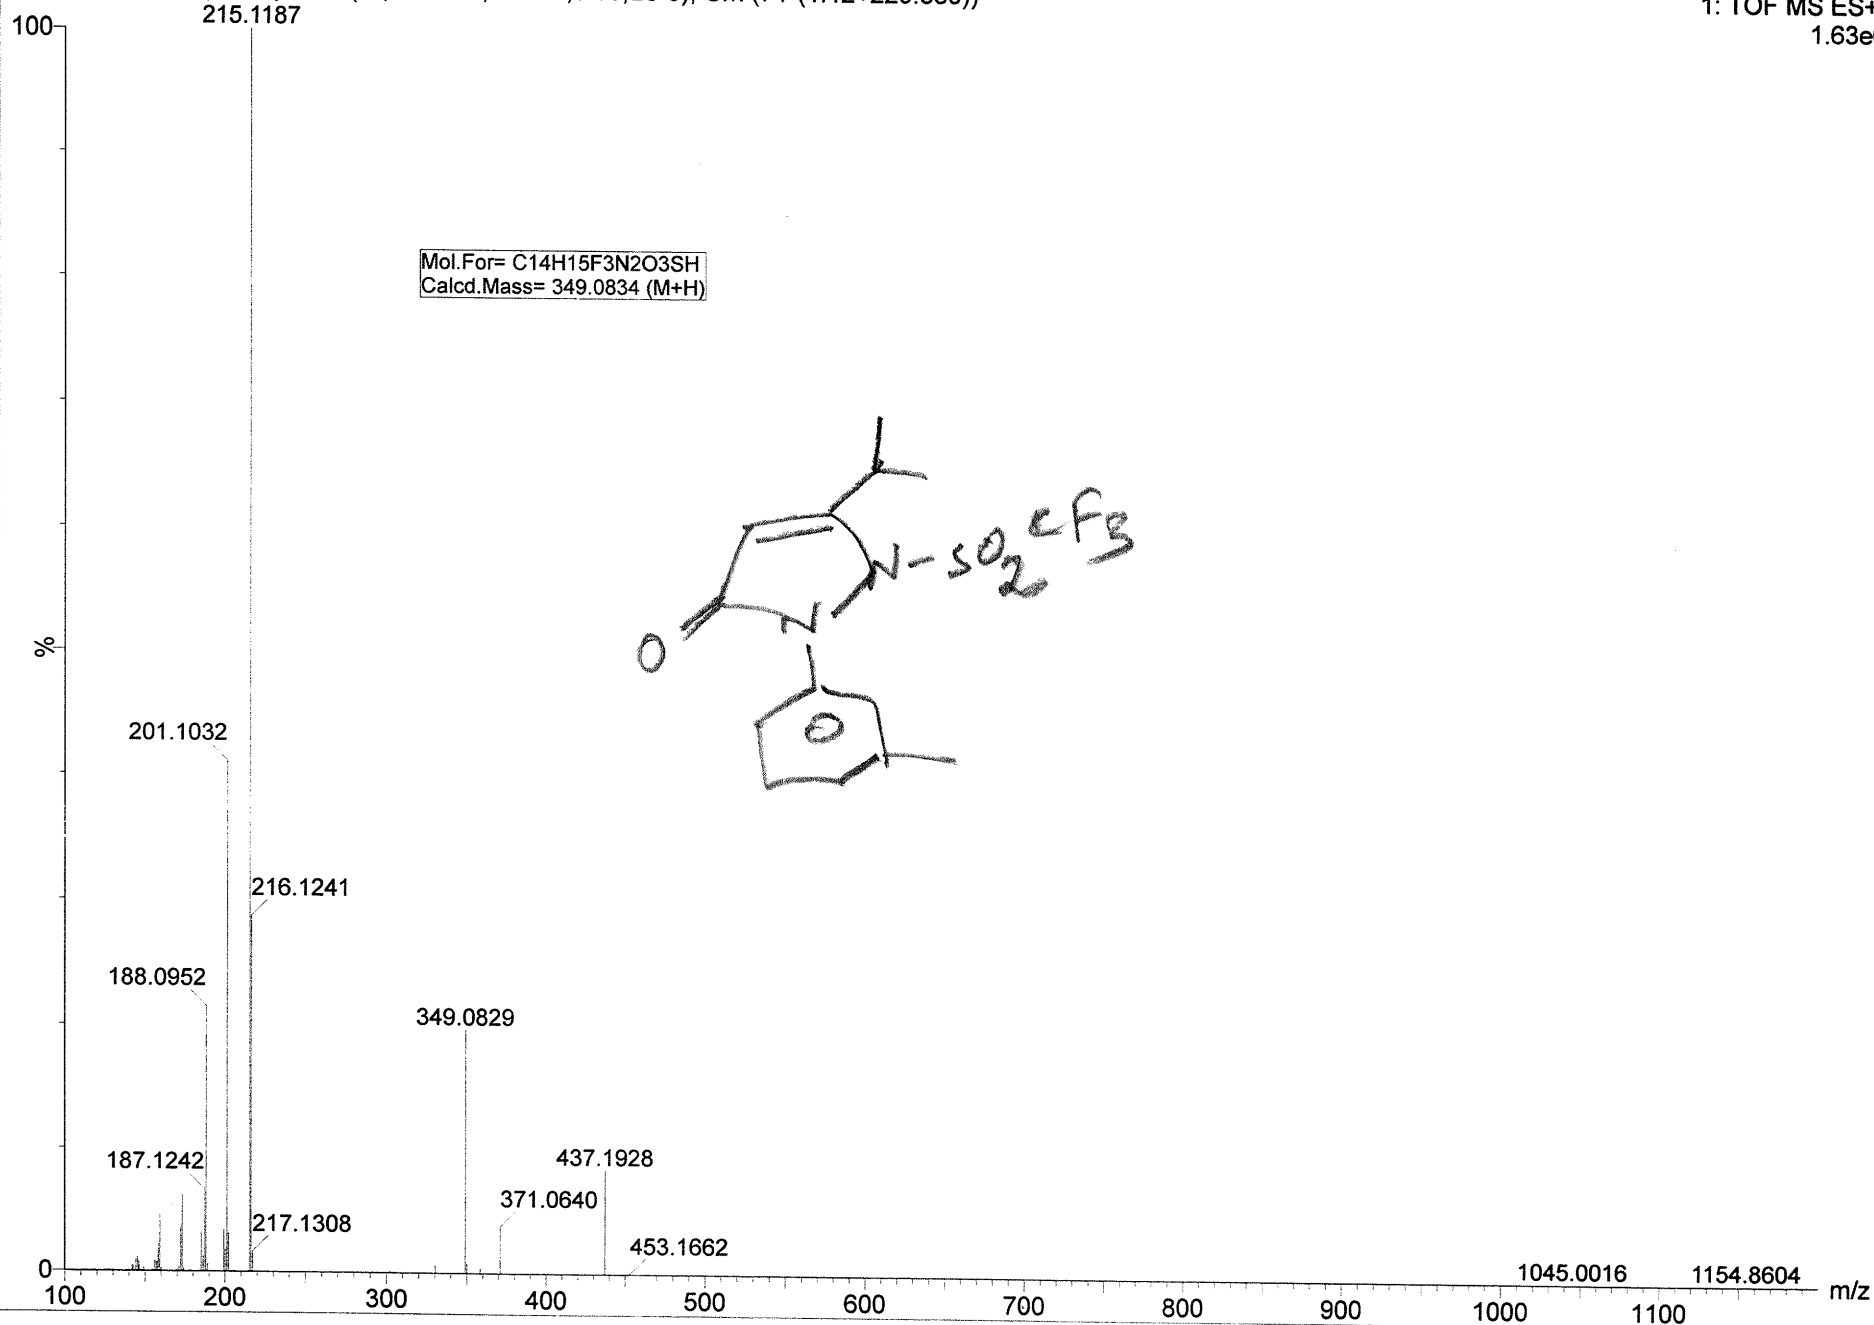

AP-NM-24

IISc Organic Chemistry

27-Oct-2020

27102020\_23 70 (0.657) AM2 (Ar,22000.0,556.28,0.00,LS 3); Cm (70-(18:37+263:266))

1: TOF MS ES+

8.21e5

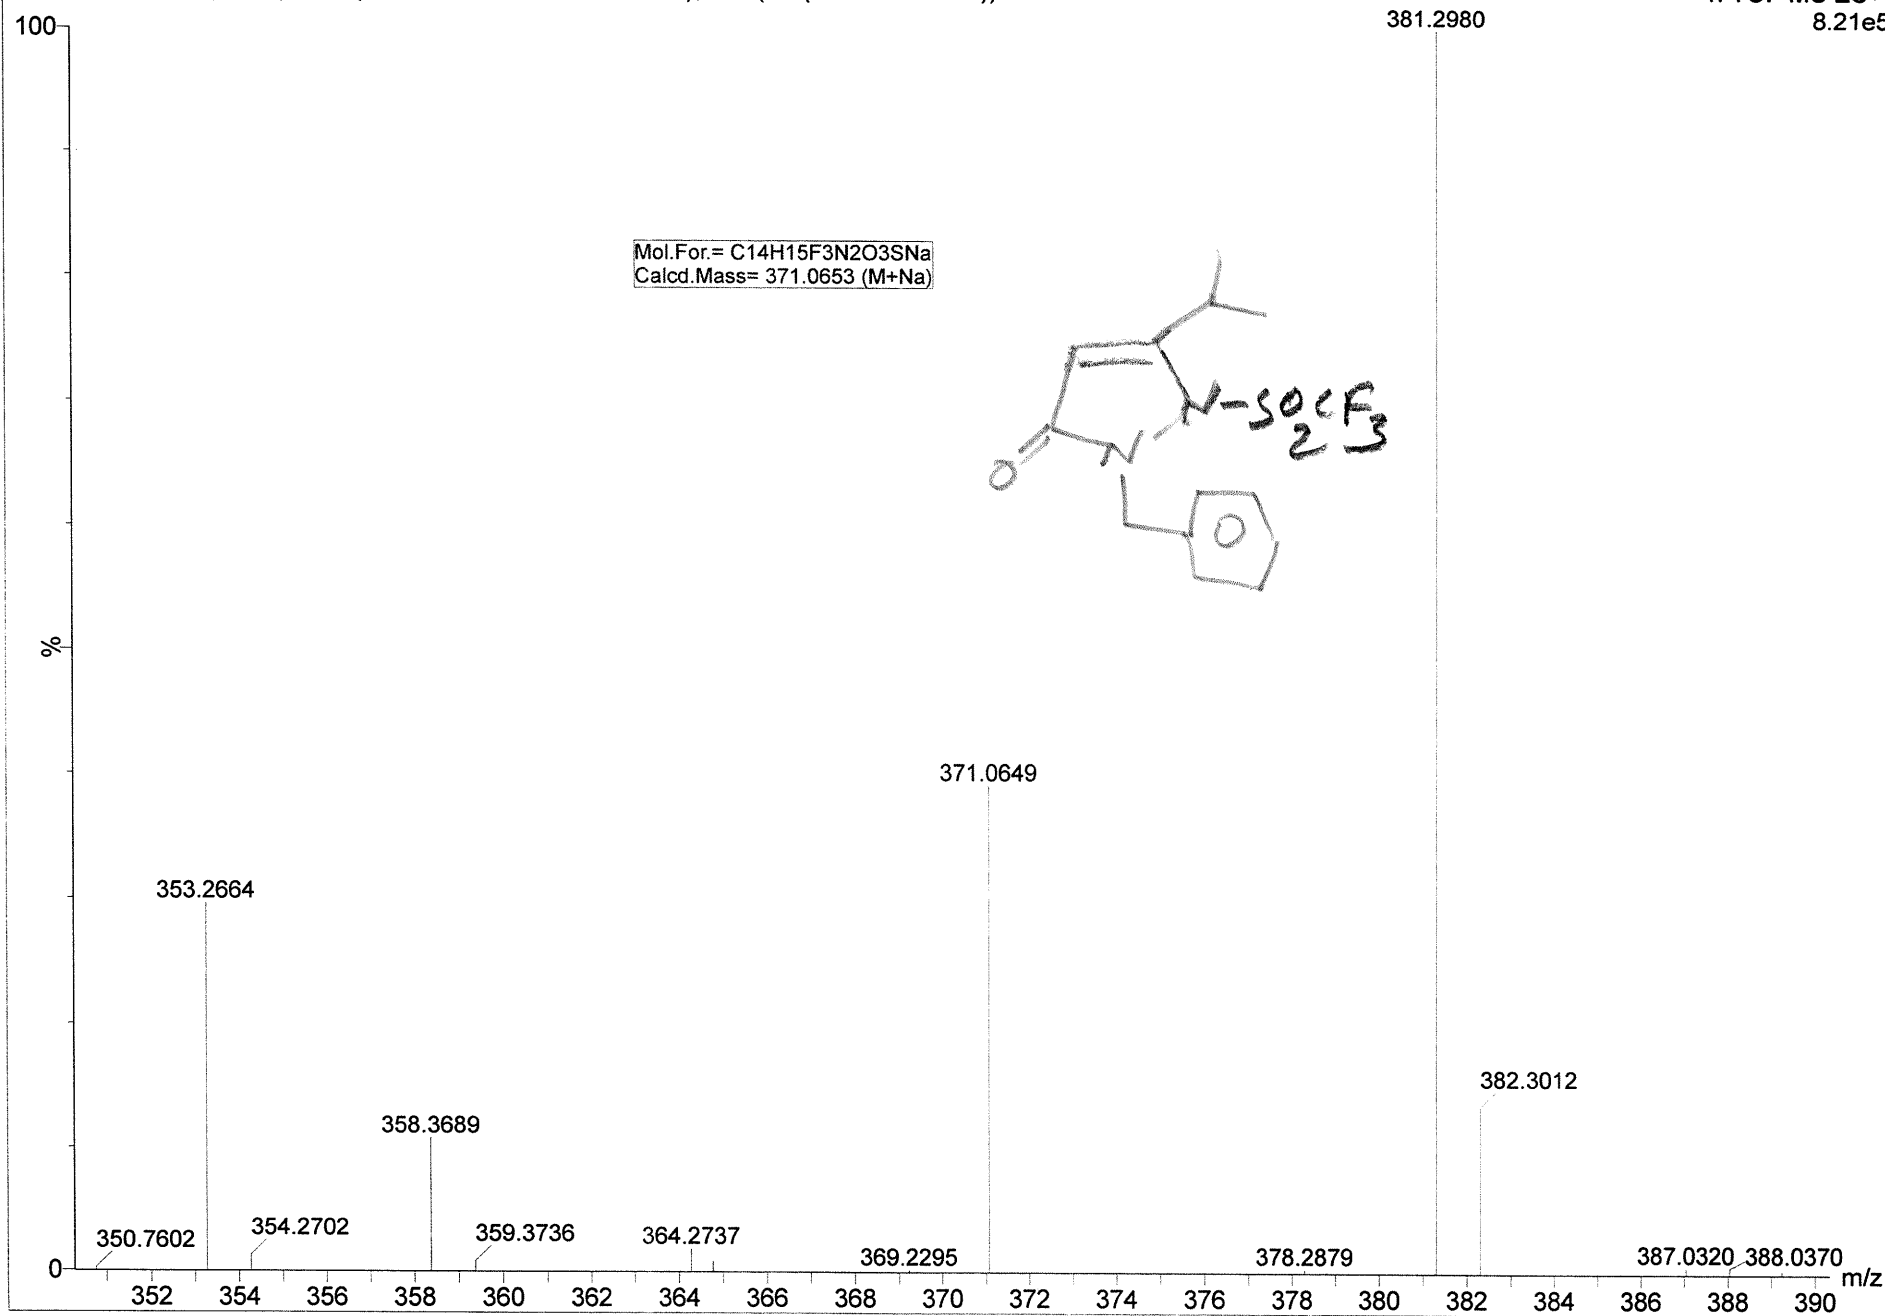

AP-NP-Br

08122020\_01 95 (0.891) AM2 (Ar,22000.0,556.28,0.00,LS 3); Cm (95-1:73)

IISc Organic Chemistry

08-Dec-2020

1: TOF MS ES+  
9.89e6

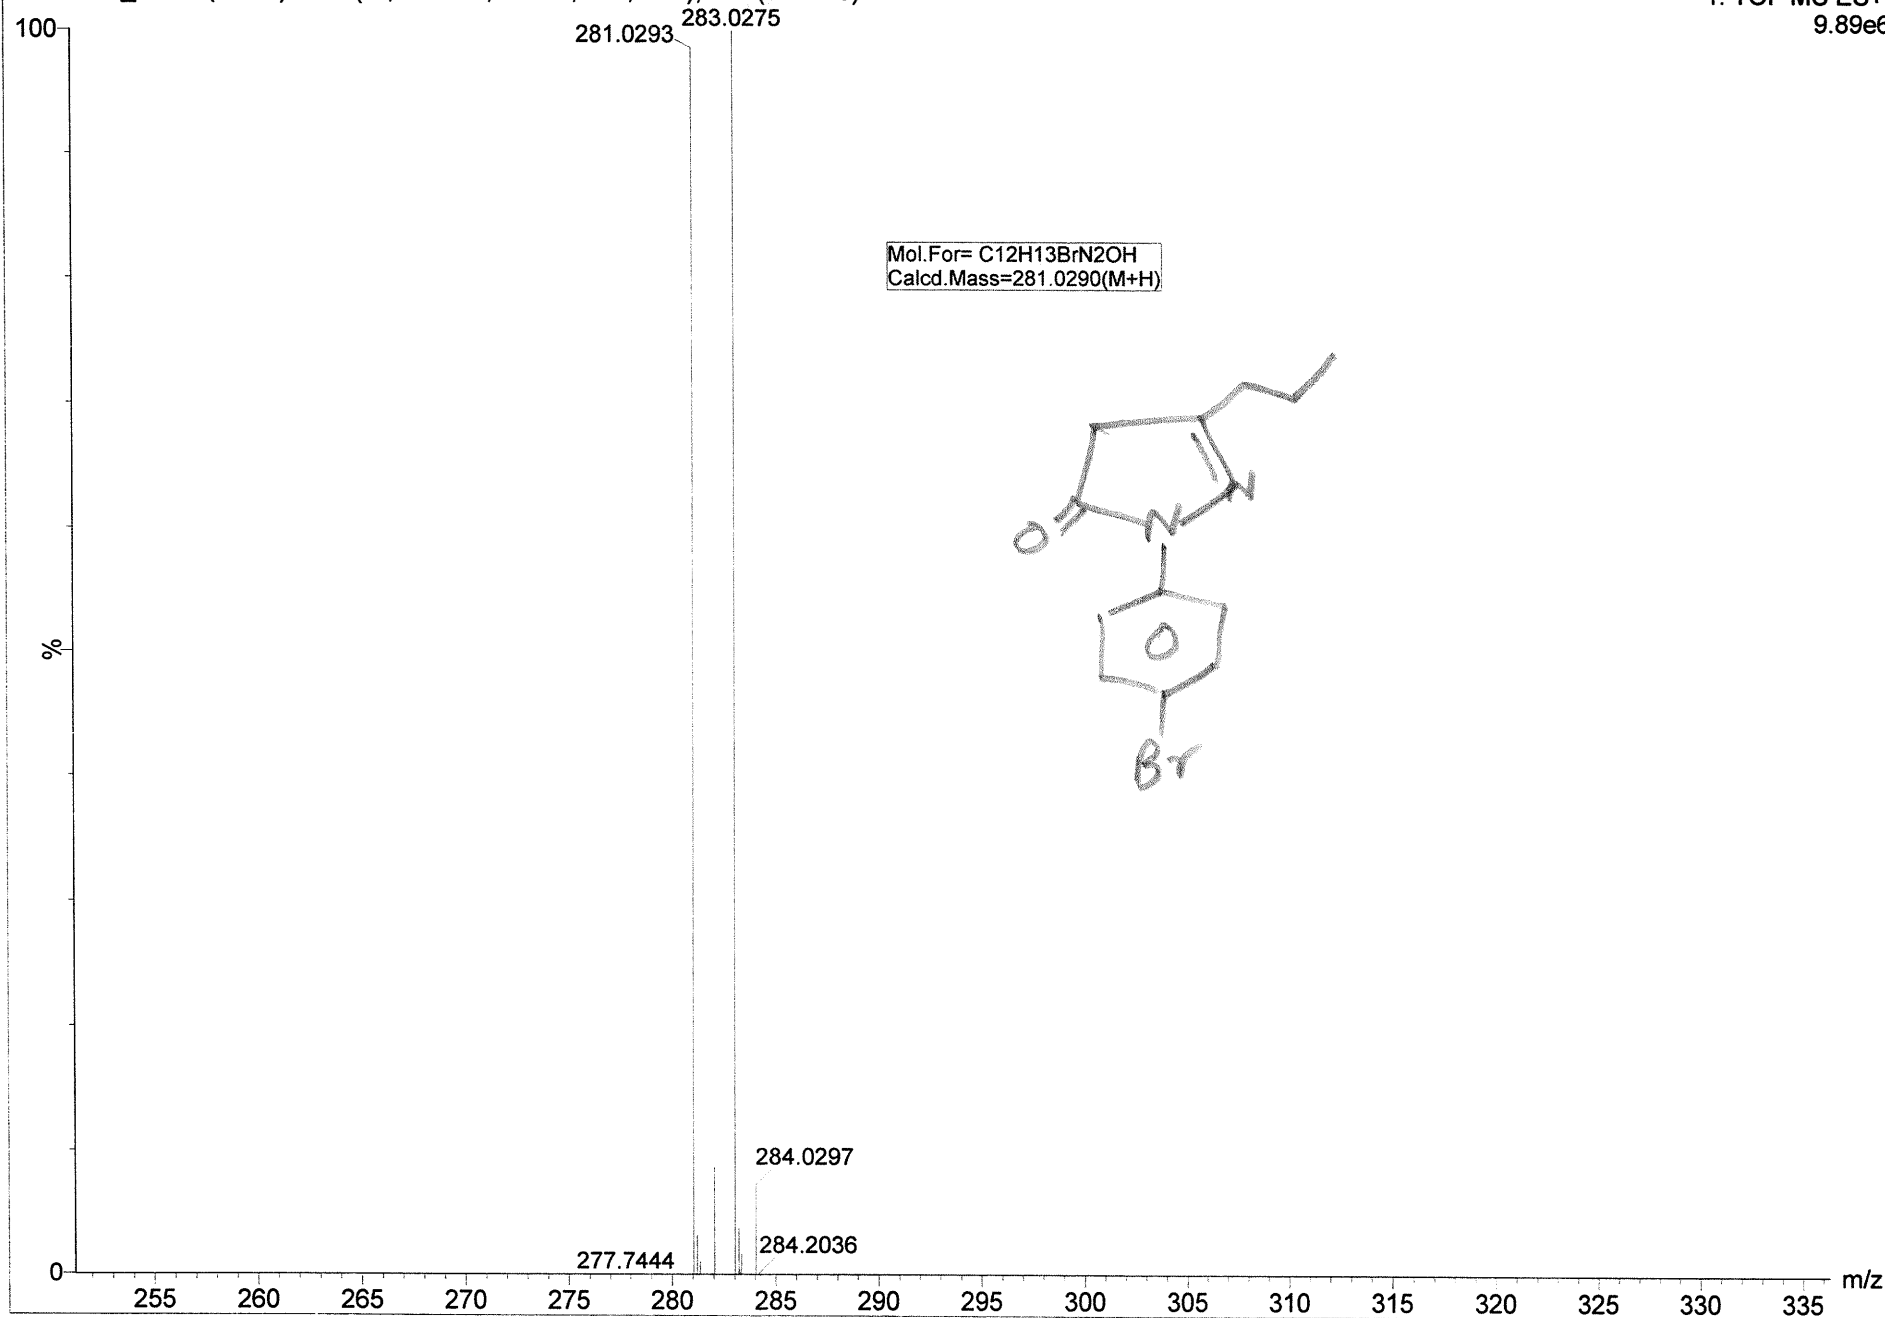

Mol. For= C<sub>12</sub>H<sub>13</sub>BrN<sub>2</sub>OH  
Calcd. Mass=281.0290(M+H)

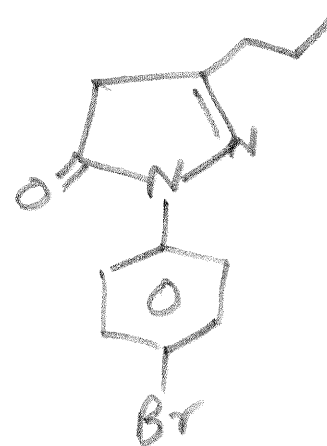



AP-NP-CN

08122020\_03 154 (1.436) AM2 (Ar,22000.0,556.28,0.00,LS 3); Cm (154-(1:71+336:403))

IISc Organic Chemistry

08-Dec-2020

1: TOF MS ES+

3.04e5

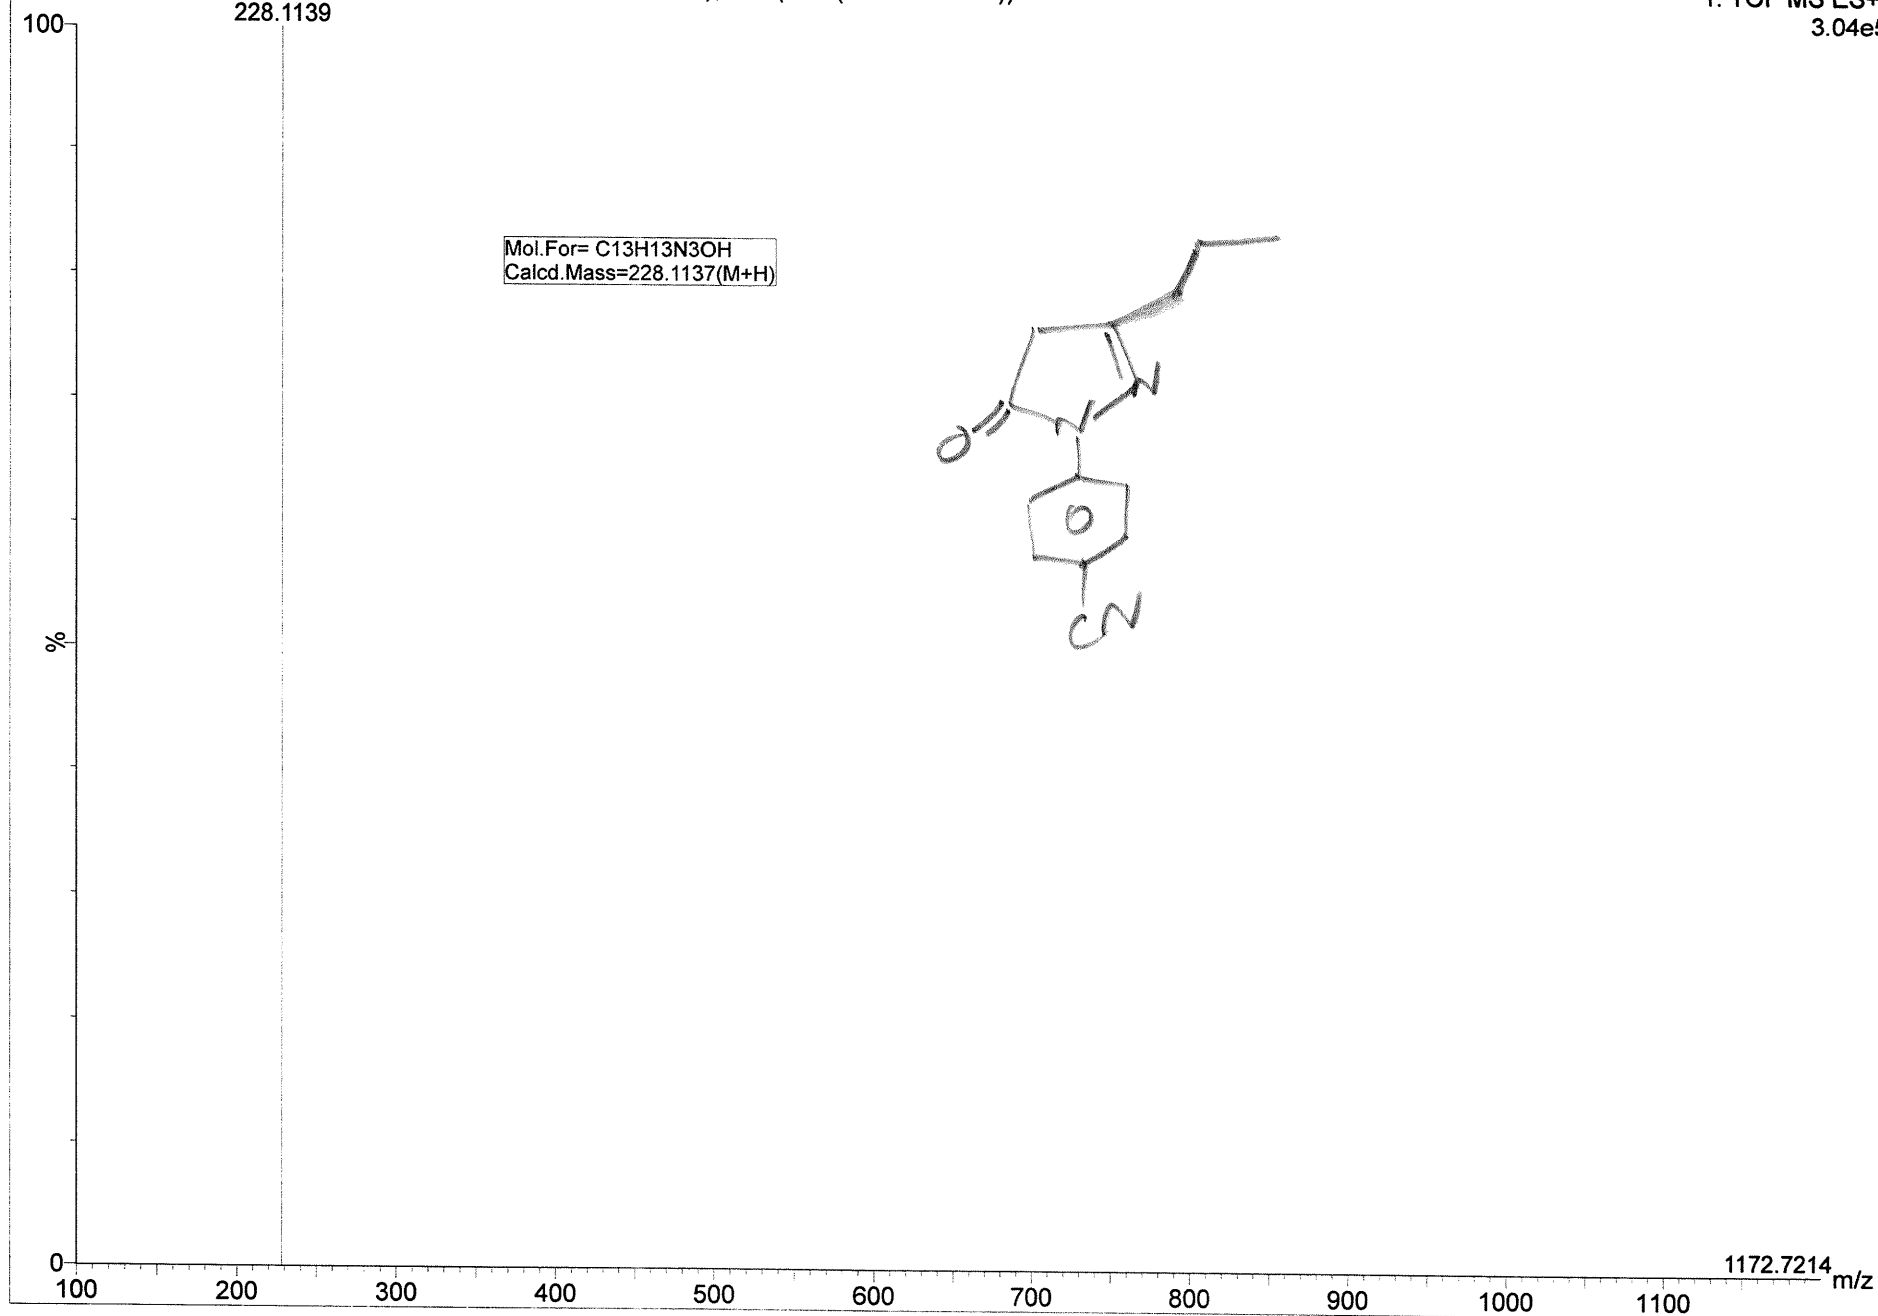

AP-NP-NO2

IISc Organic Chemistry

08-Dec-2020

08122020\_04 173 (1.599) AM2 (Ar,22000.0,556.28,0.00,LS 3); Cm (173-1:72)

1: TOF MS ES+

1.81e6

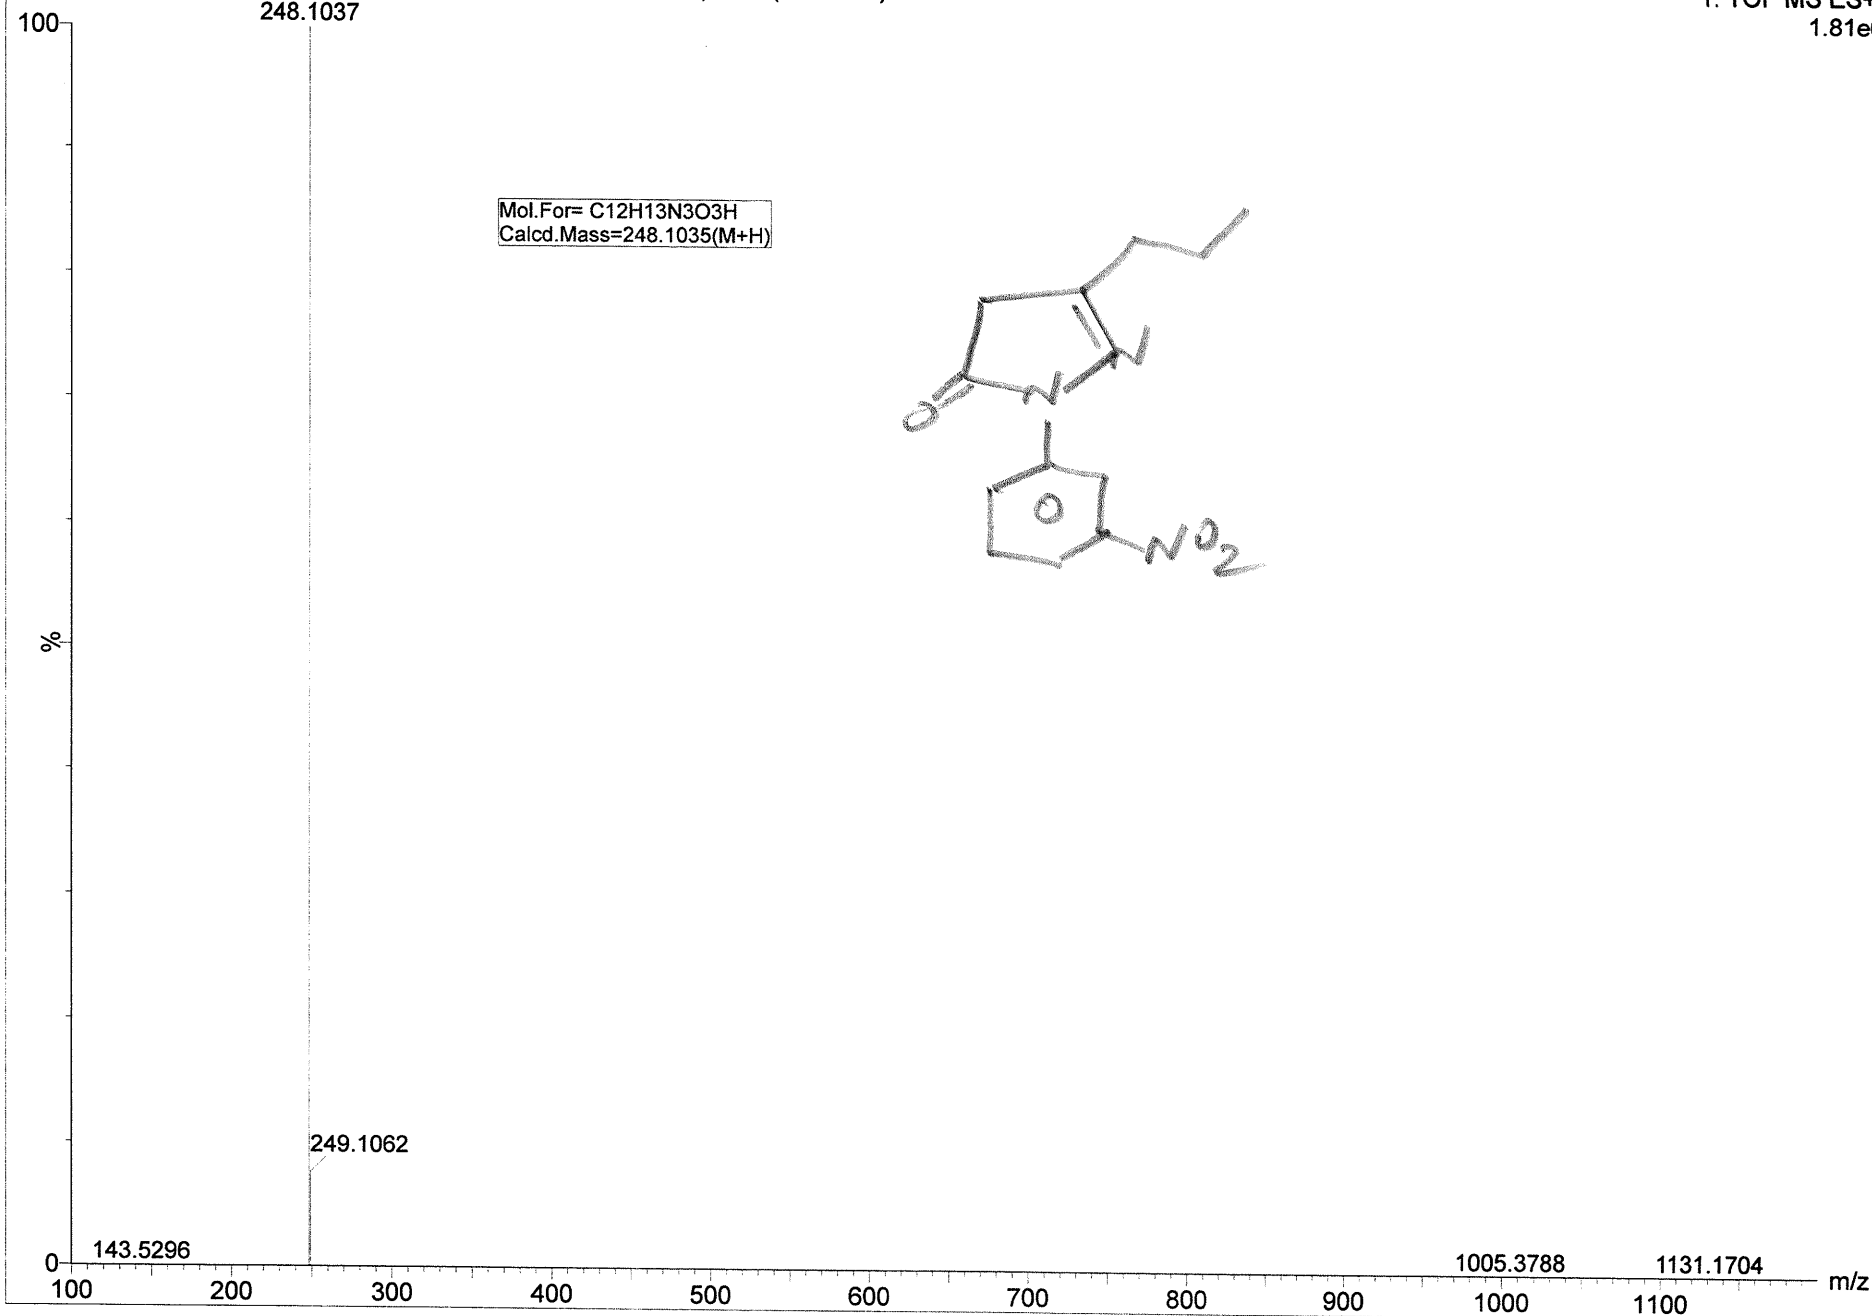

Mol. For= C<sub>12</sub>H<sub>13</sub>N<sub>3</sub>O<sub>3</sub>H  
Calcd. Mass=248.1035(M+H)

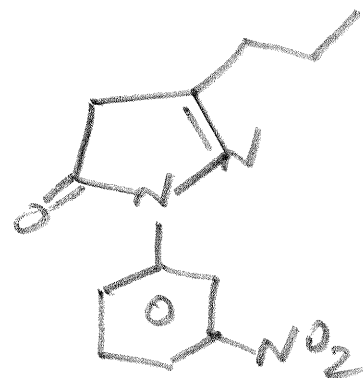

AP-NP-3Me

08122020\_02 202 (1.868) AM2 (Ar,22000.0,556.28,0.00,LS 3); Cm (202-1:67)

IISc Organic Chemistry

08-Dec-2020

1: TOF MS ES+

1.26e6

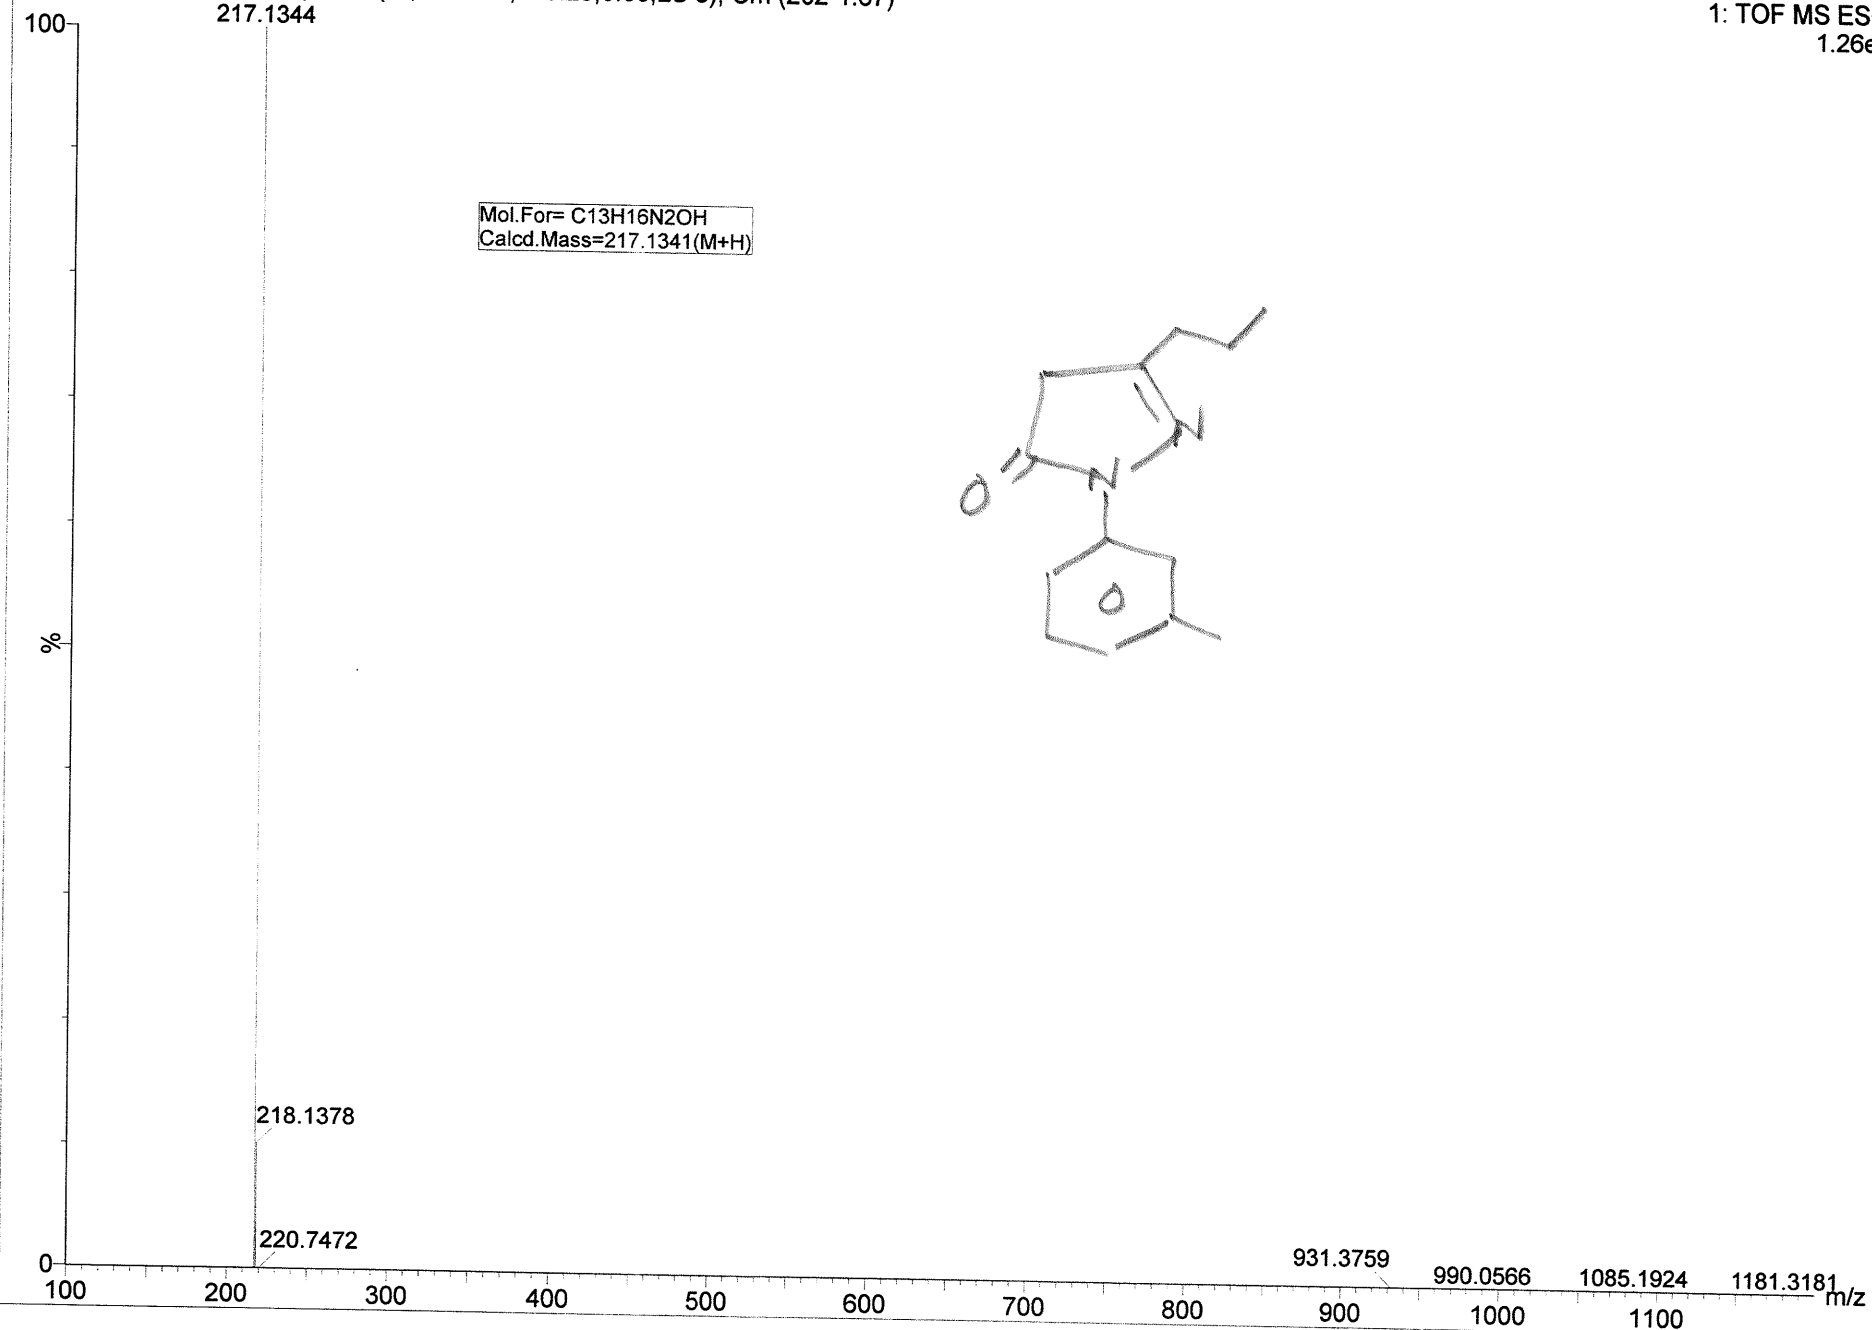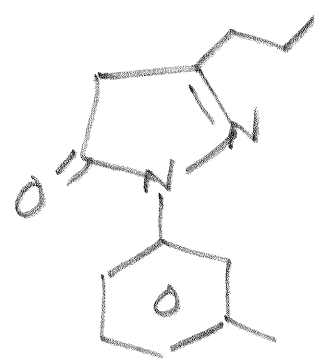

AP-NP-BN

IISc Organic Chemistry

08-Dec-2020

08122020\_05 124 (1.159) AM2 (Ar,22000.0,556.28,0.00,LS 3); Cm (124-205:435)

1: TOF MS ES+  
3.01e6

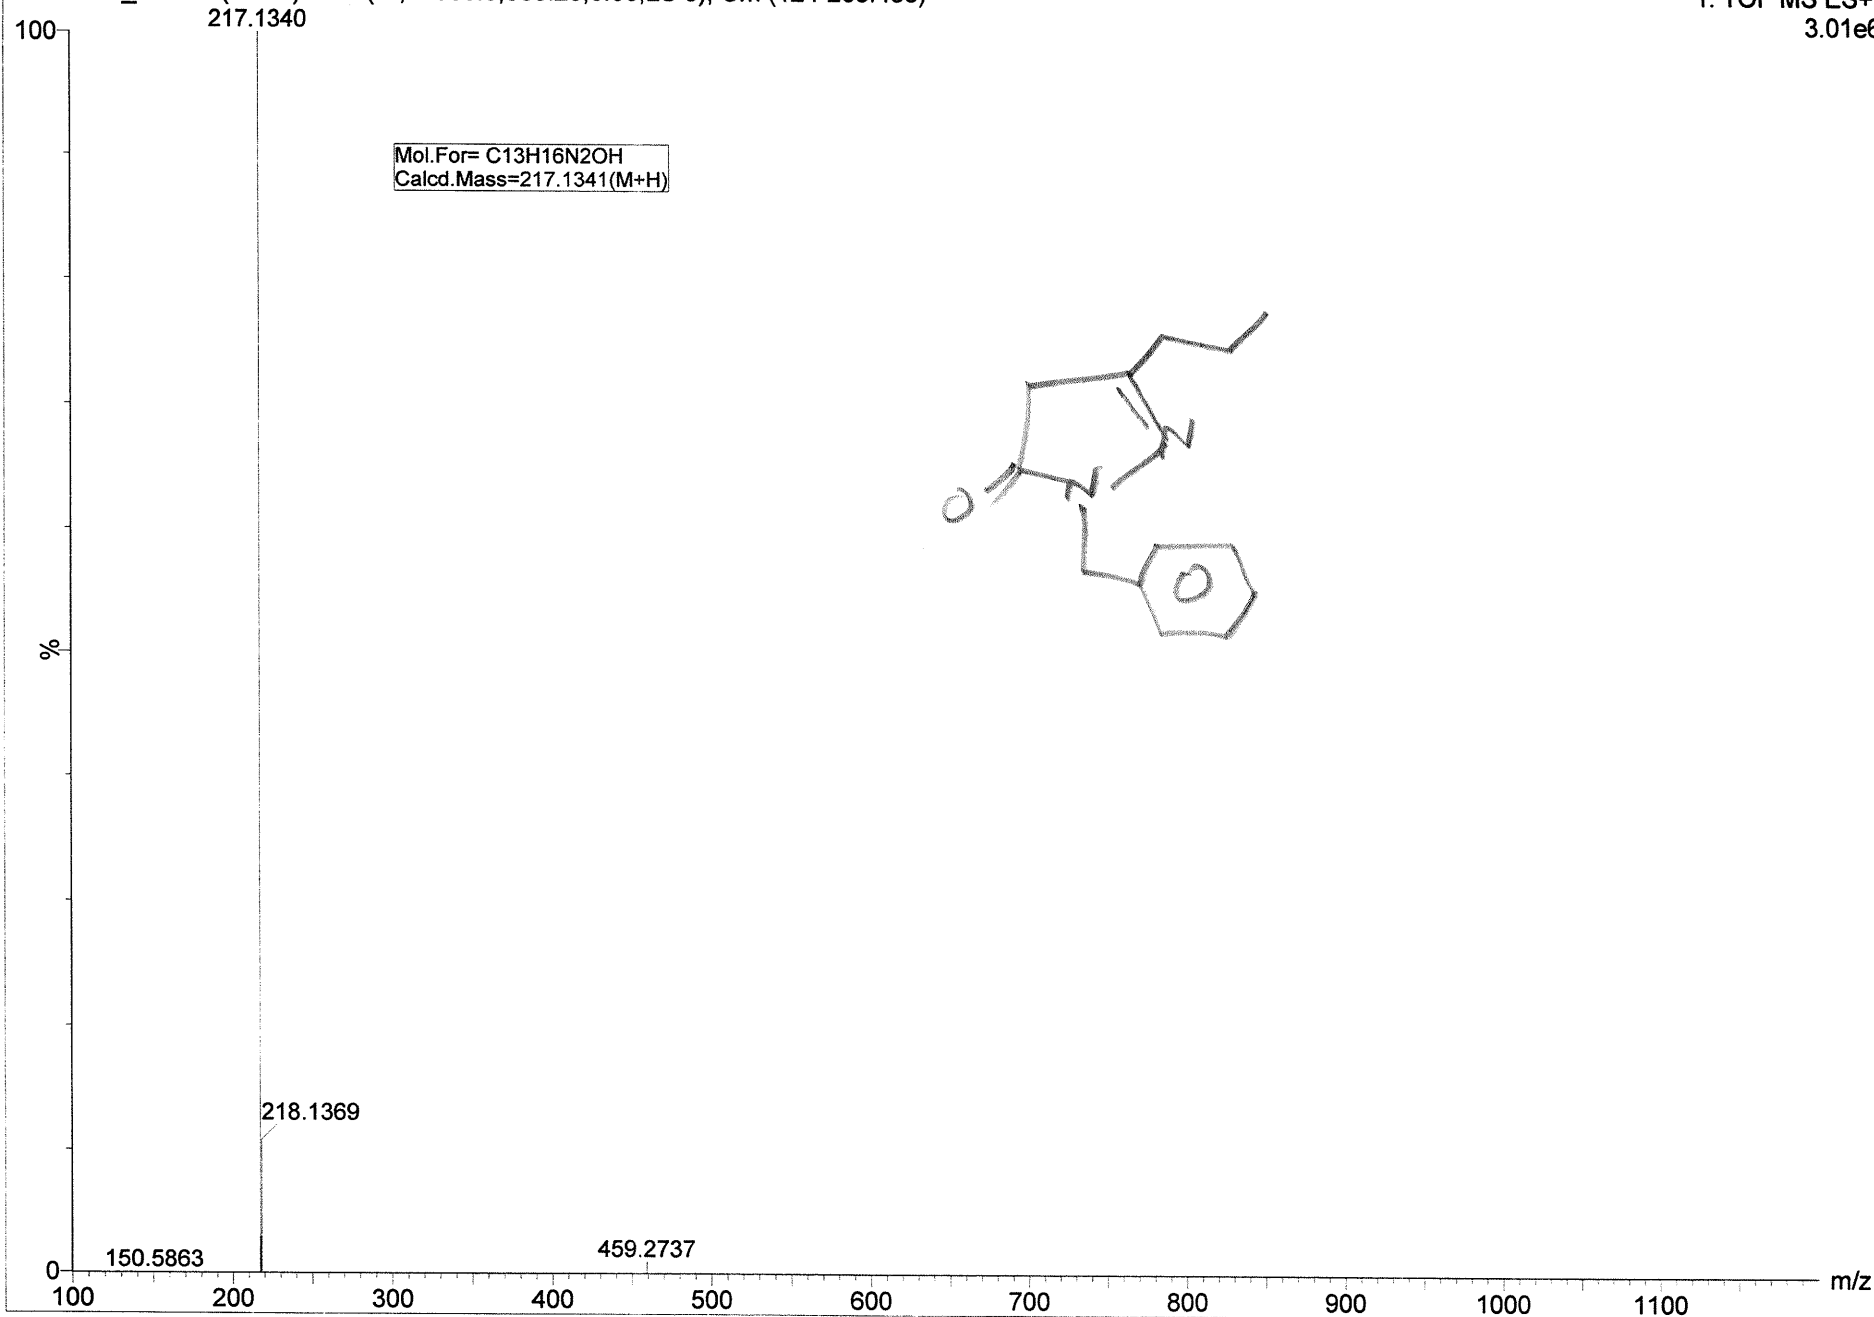

AP-IP-Br

IISc Organic Chemistry

08-Dec-2020

08122020\_06 70 (0.657) AM2 (Ar,22000.0,556.28,0.00,LS 3); Cm (70-6:55)

1: TOF MS ES+

8.00e6

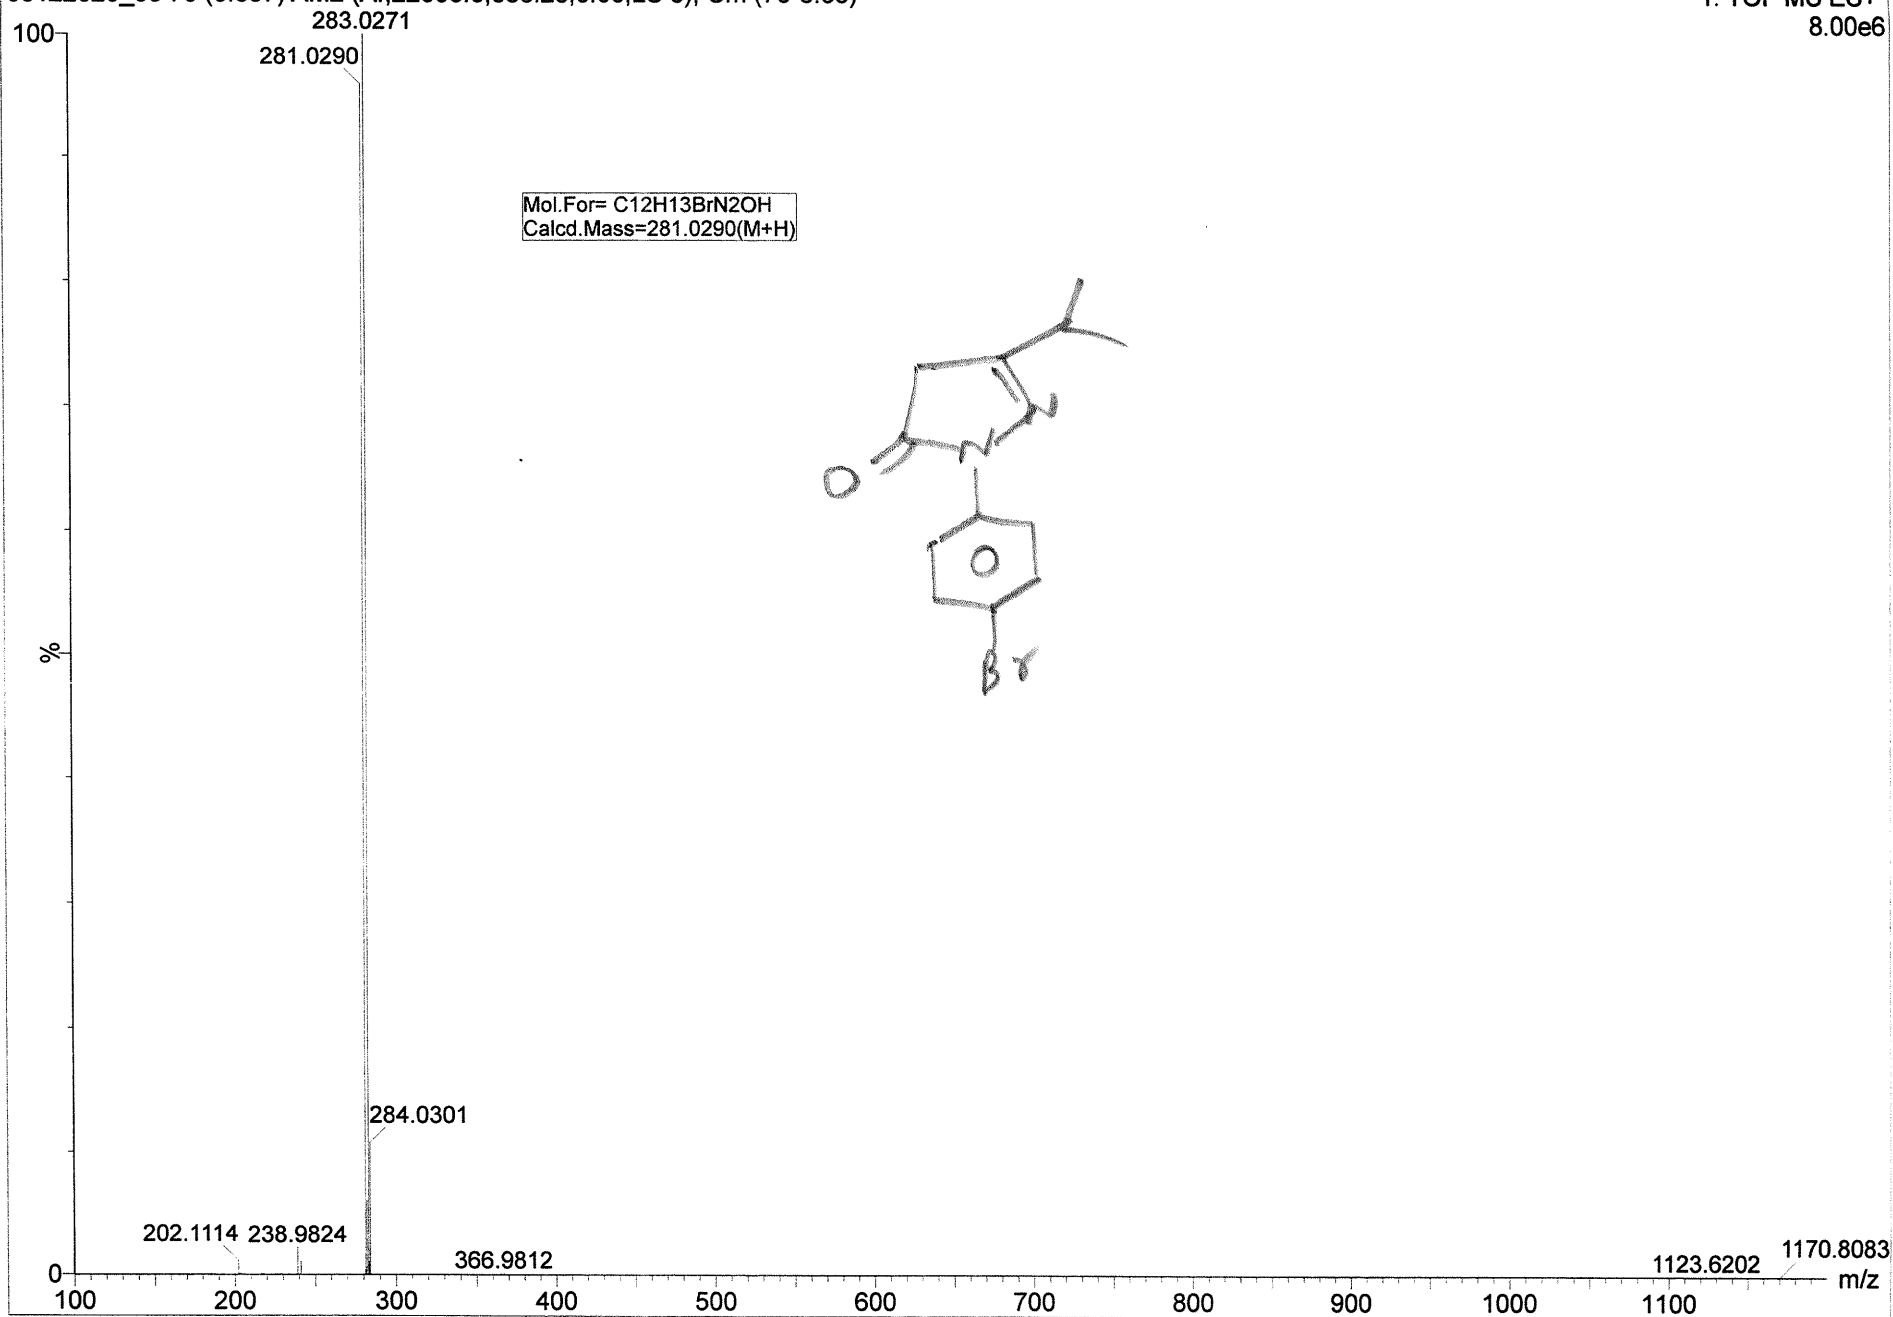

AP-IP-CN

08122020\_07 153 (1.428) AM2 (Ar,22000.0,556.28,0.00,LS 3); Cm (153-3:57)

IISc Organic Chemistry

08-Dec-2020

1: TOF MS ES+

1.02e6

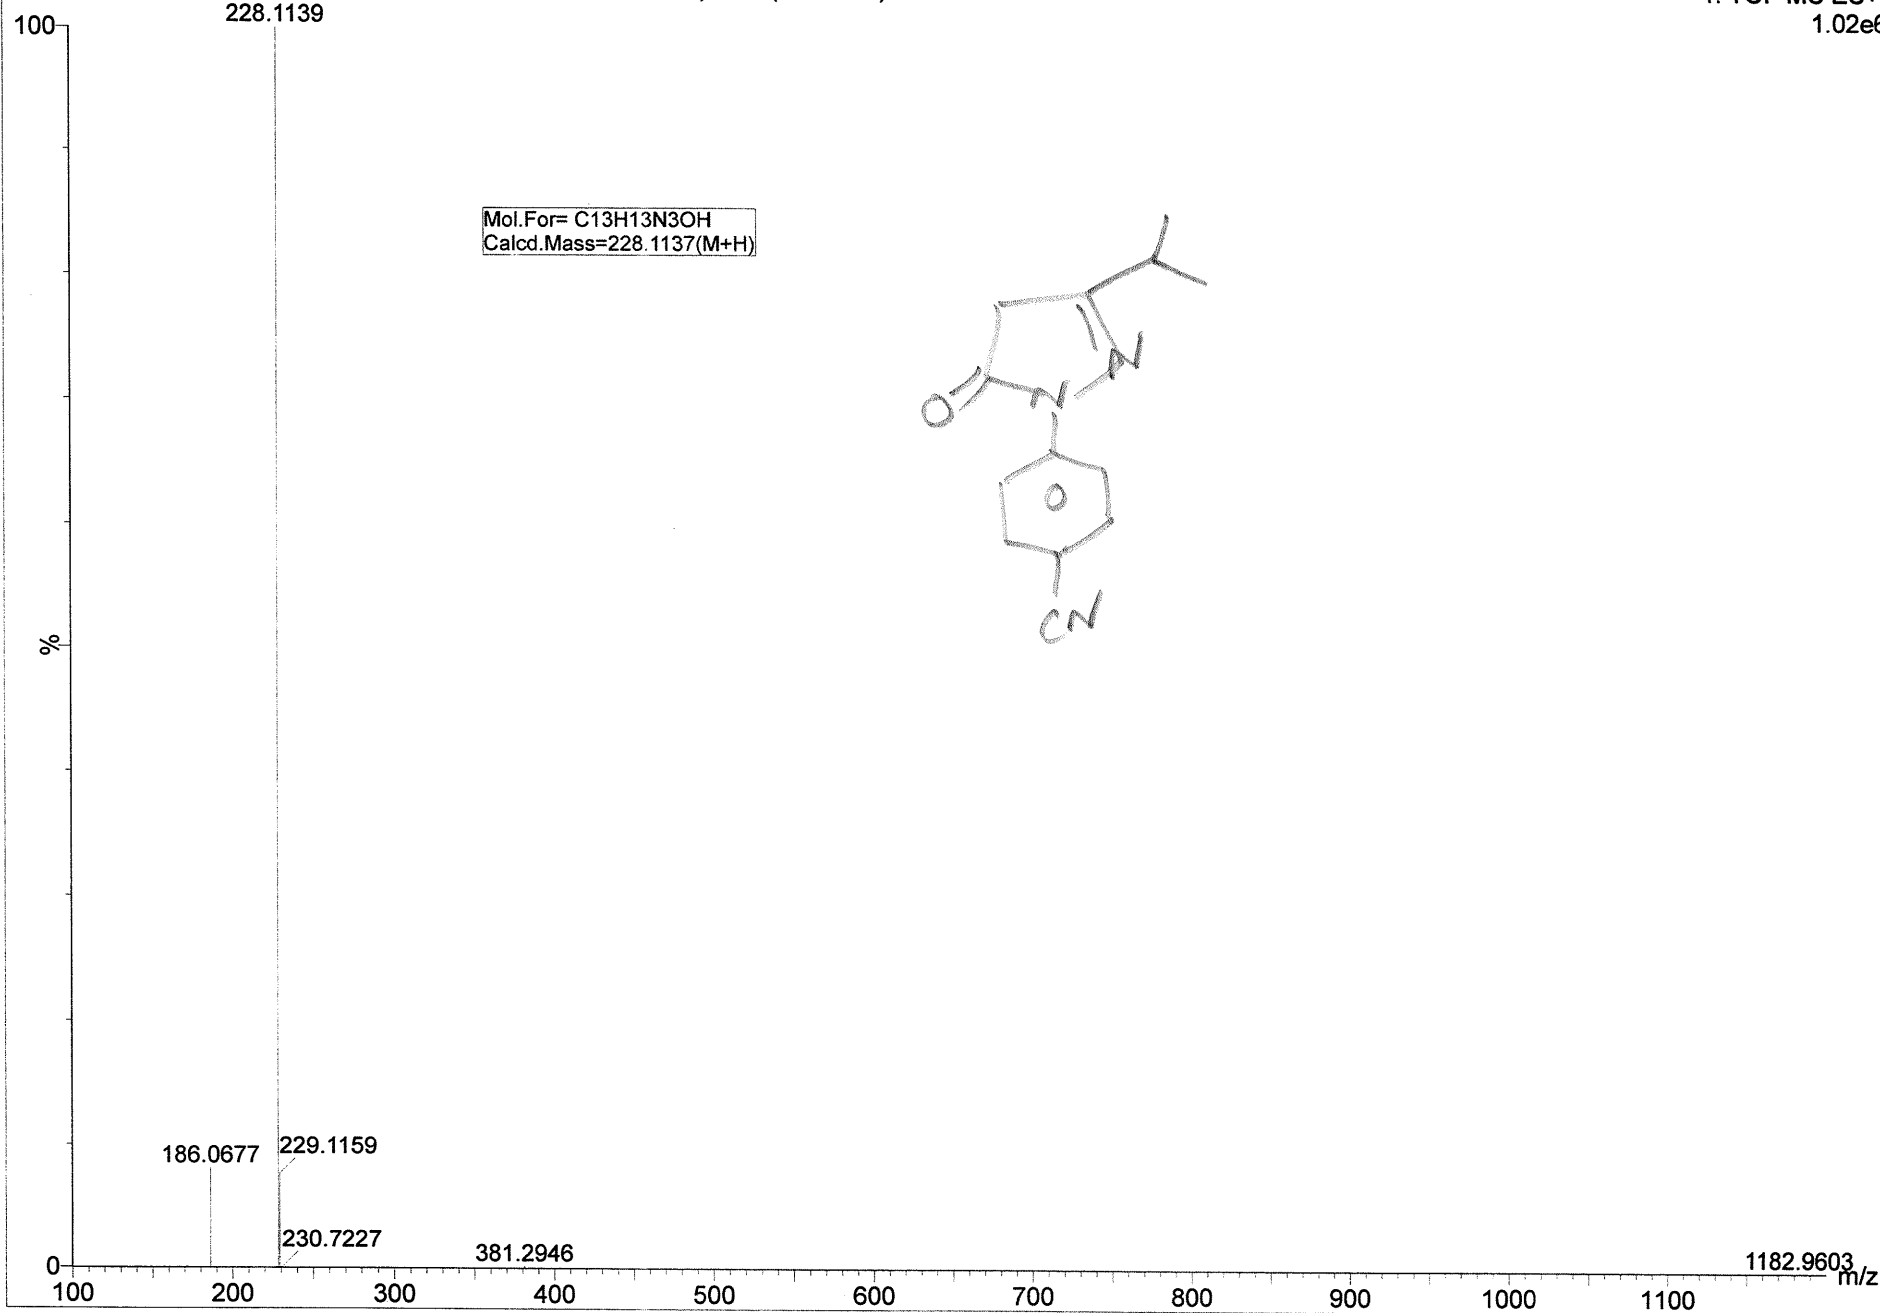

Mol. For= C<sub>13</sub>H<sub>13</sub>N<sub>3</sub>OH  
Calcd. Mass=228.1137(M+H)

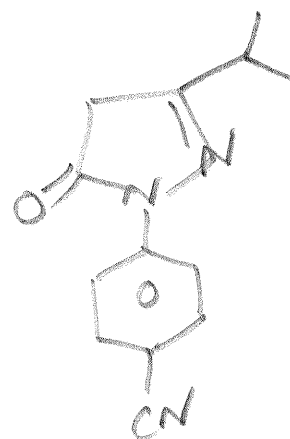

AP-IP-NO2

08122020\_09 138 (1.279) AM2 (Ar,22000.0,556.28,0.00,LS 3); Cm (138-1:52)

IISc Organic Chemistry

08-Dec-2020

1: TOF MS ES+

2.77e6

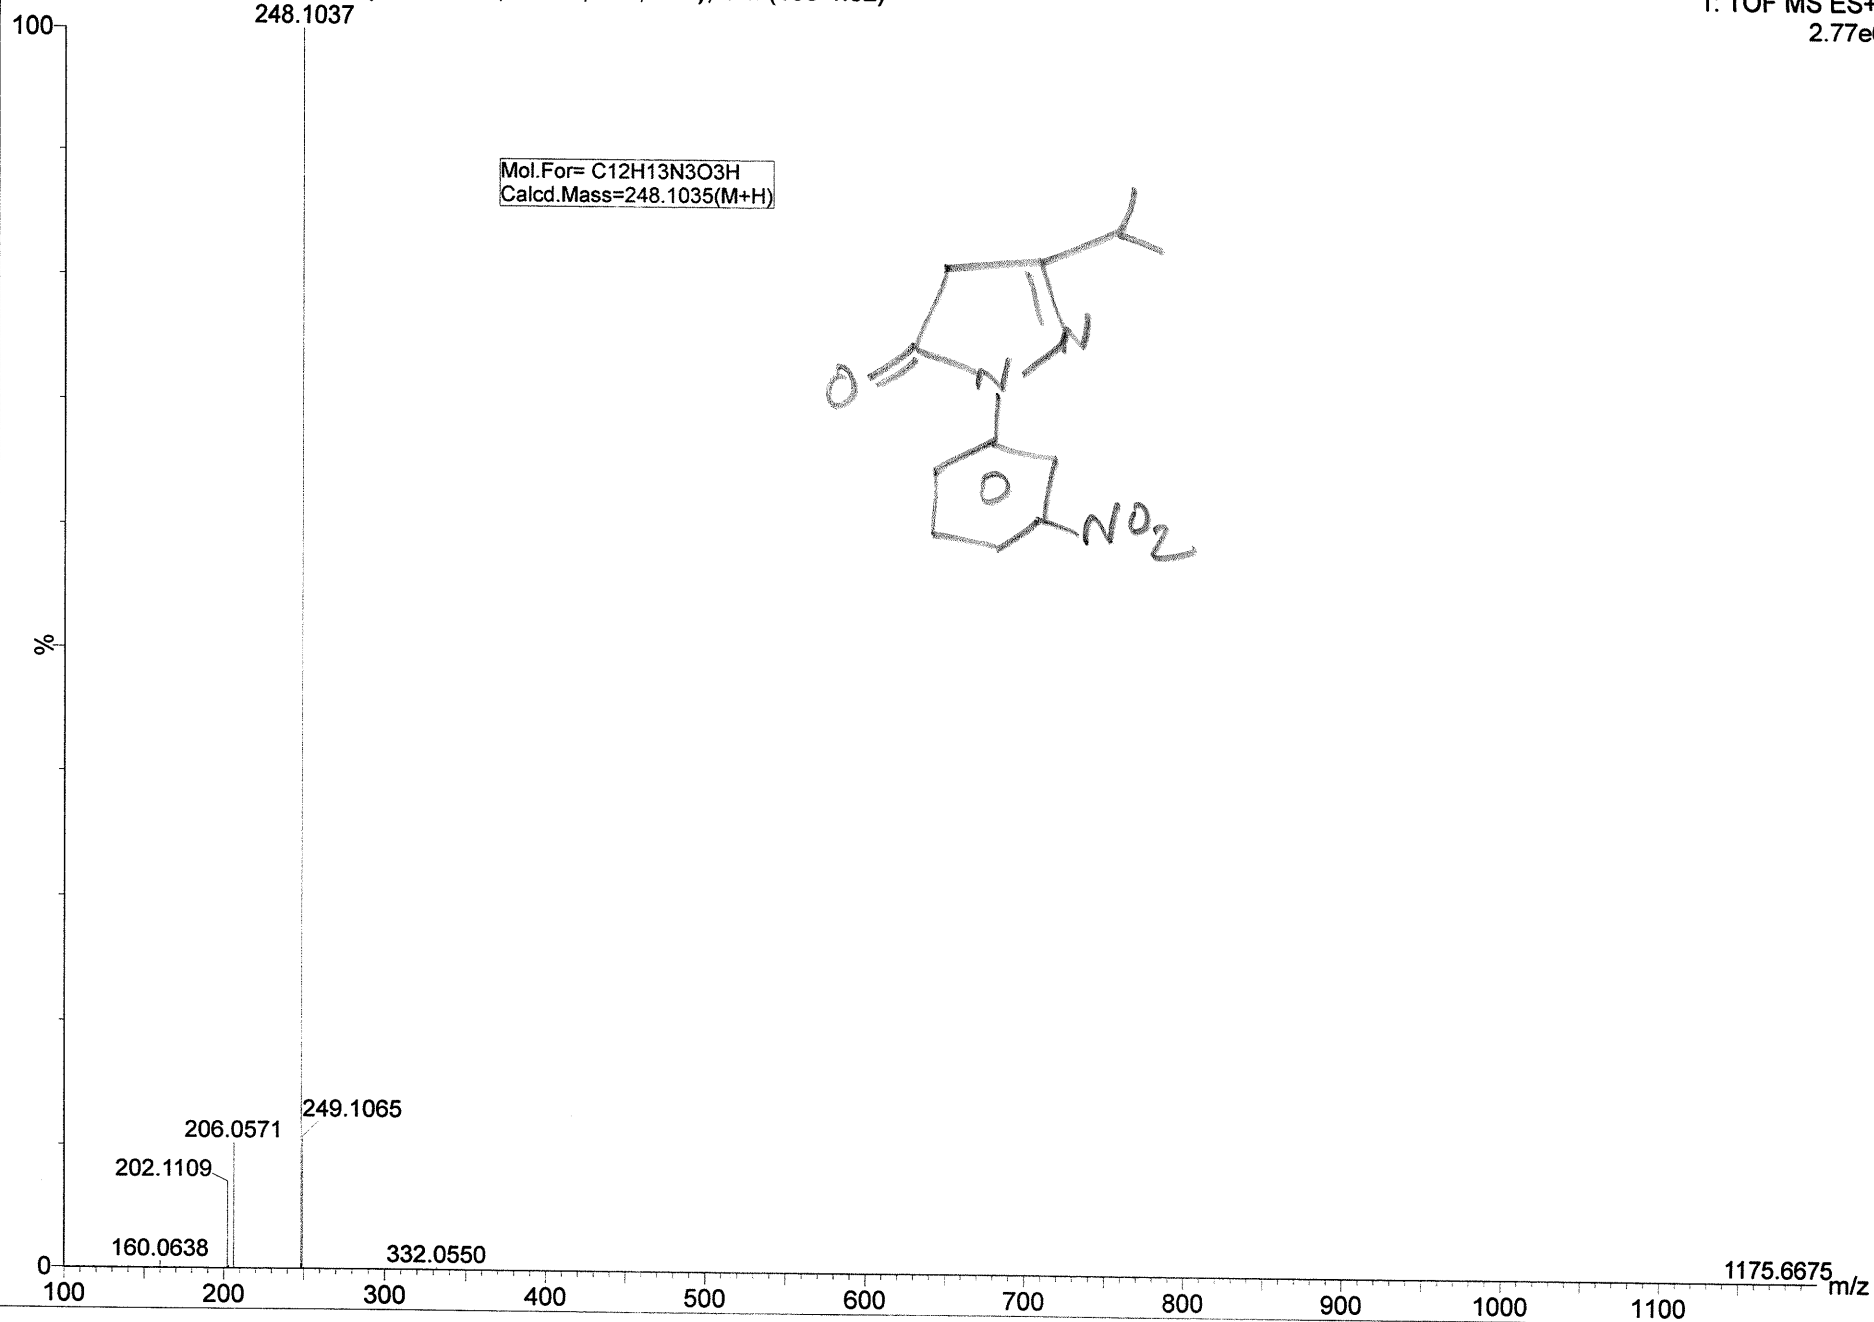

Mol. For= C<sub>12</sub>H<sub>13</sub>N<sub>3</sub>O<sub>3</sub>H  
Calcd. Mass=248.1035(M+H)

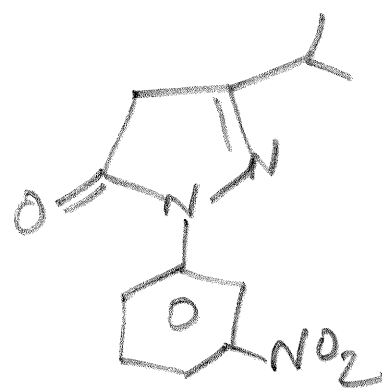

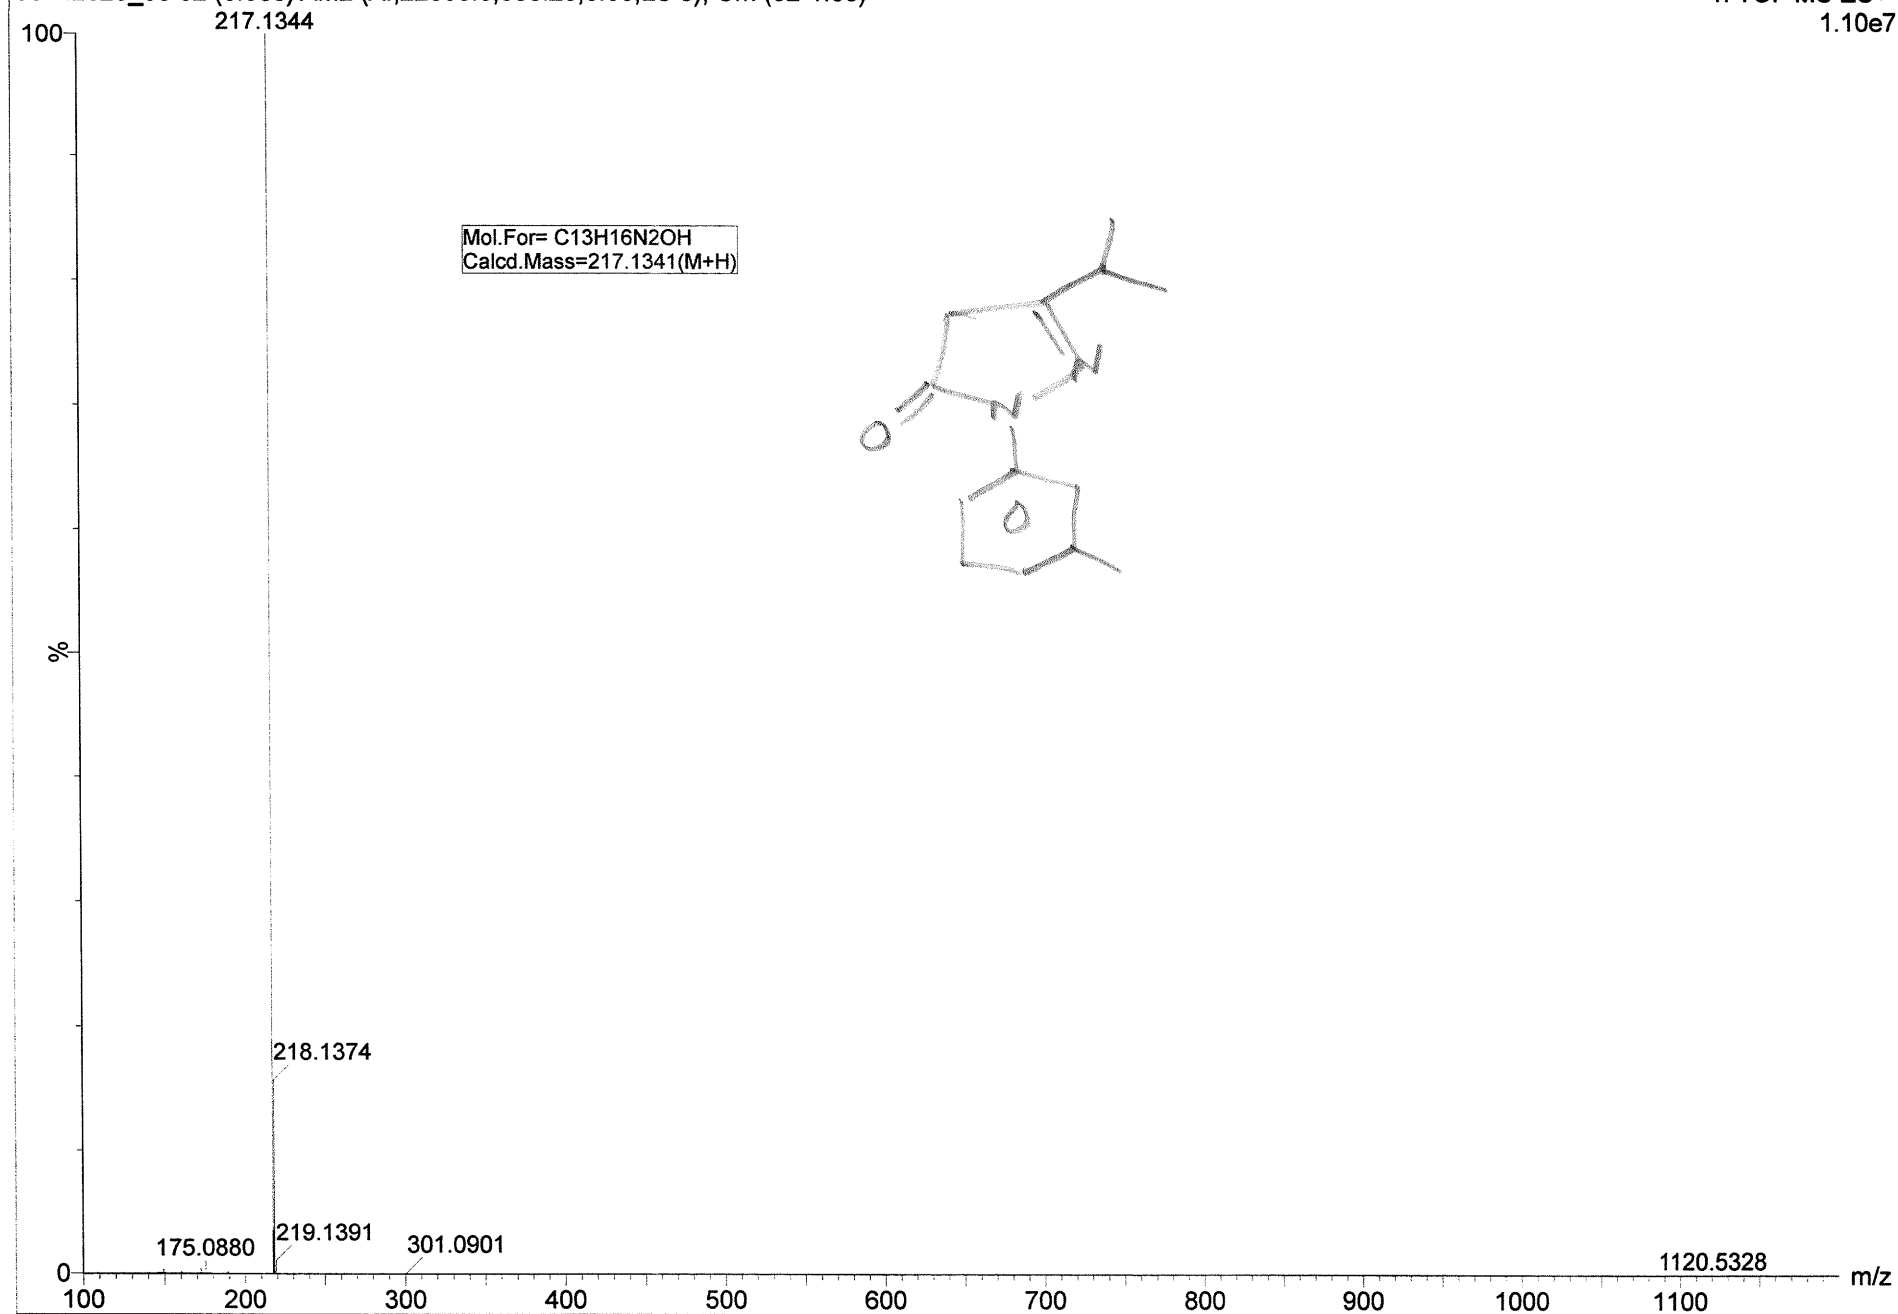

Supplement: d1ob00862e2.pdf [file d1ob00862e2.pdf]
